# Supplementary material for: D-Dimer Combined with Fibrinogen Predicts the Risk of Venous Thrombosis in Fracture Patients
Source: Emerg Med Int. 2020 Sep 23;2020:1930405. doi: 10.1155/2020/1930405 (PMC7530481; doi:10.1155/2020/1930405)
Supplement: Supplementary Materials — Data of all included patients. [file 1930405.f1.xlsx]

## Sheet: d220170607
	住院号	1	A检查结果	A单位	A取值范围	A是否正常	A结果时间	2	B检查结果	B单位	B取值范围	B是否正常	B结果时间	3	N检查结果	N单位	N取值范围	N是否正常	N结果时间	4	D检查结果	D单位	D取值范围	D是否正常	D结果时间	5	E检查结果	E单位	E取值范围	E是否正常	E结果时间	6	F检查结果	F单位	F取值范围	F是否正常	F结果时间	7	G检查结果	G单位	G取值范围	G是否正常	G结果时间	8	H检查结果	H单位	H取值范围	H是否正常	H结果时间
1	1000004668002	凝血酶原国际比值	1.02		0.7-1.3	M	2016-01-20 11:13:18	低密度脂蛋白	2.64	mmol/l	健康人群:1.8-3.36;心脑血管疾病危险人群:<2.59	M	2016-01-20 11:32:00	部分凝血活酶时间	26.5	S	22-45	M	2016-01-20 11:13:18	*总胆固醇	5.51	mmol/l	3.6-5.17	H	2016-01-20 11:32:00	D二聚体	90	ng/ml	0-115	M	2016-01-20 11:13:18	*葡萄糖	4.25	mmol/l	3.89-6.11	M	2016-01-20 11:32:00	C反应蛋白	4.13	mg/l	0-8	M	2016-01-20 11:32:00	凝血酶原时间(PT)	11.7	S	42992	M	2016-01-20 11:13:18
2	1000016548002	凝血酶原国际比值	1.03		0.7-1.3	M	2014-09-04 11:31:46	低密度脂蛋白	2.03	mmol/l	健康人群:1.8-3.36;心脑血管疾病危险人群:<2.59	M	2014-09-04 11:38:26	部分凝血活酶时间	31.2	S	22-45	M	2014-09-04 11:31:46	*总胆固醇	3.51	mmol/l	3.6-5.17	L	2014-09-04 11:38:26	D二聚体	520	ng/ml	0-115	H	2014-09-04 11:31:46	*葡萄糖	5.15	mmol/l	3.89-6.11	M	2014-09-04 11:38:26	C反应蛋白	22.99	mg/l	0-8	H	2014-09-04 11:37:56	凝血酶原时间(PT)	11.9	S	42992	M	2014-09-04 11:31:46
3	1000020371003	凝血酶原国际比值	1.07		0.72-1.29	M	2011-09-20 10:28:16	低密度脂蛋白	2.57	mmol/l	2.7-3.36	L	2011-09-20 09:37:49	部分凝血活酶时间	31.3	S	22-45	M	2011-09-20 10:28:16	*总胆固醇	5.4	mmol/l	42800	M	2011-09-20 09:37:49	D二聚体	313	ng/ml	0-256	H	2011-10-26 14:09:41	*葡萄糖	5.22	mmol/l	3-6.1	M	2011-09-20 09:37:49	C反应蛋白	7.2	mg/l	0-8	M	2011-09-20 09:10:13	凝血酶原时间(PT)	12.3	S	42991	M	2011-09-20 10:28:16
4	1000027983002	凝血酶原国际比值	1.01		0.72-1.29	M	2011-06-21 09:39:39	低密度脂蛋白	3.56	mmol/l	2.7-3.36	H	2011-06-21 11:16:19	部分凝血活酶时间	25.4	S	22-45	M	2011-06-21 09:39:39	*总胆固醇	5.12	mmol/l	42800	M	2011-06-21 11:16:19	D二聚体	253	ng/ml	0-500	M	2011-07-04 08:49:28	*葡萄糖	4.31	mmol/l	3-6.1	M	2011-06-21 11:16:19	C反应蛋白	2.9	mg/l	0-8	M	2011-06-21 11:21:40	凝血酶原时间(PT)	11.6	S	42991	M	2011-06-21 09:39:39
5	1000030386002	凝血酶原国际比值	0.98		0.72-1.29	M	2011-08-09 09:10:02	低密度脂蛋白	3.23	mmol/l	2.7-3.36	M	2011-08-09 09:41:32	部分凝血活酶时间	25.6	S	22-45	M	2011-08-09 09:10:02	*总胆固醇	5.27	mmol/l	42800	M	2011-08-09 09:41:32	D二聚体	148	ng/ml	0-256	M	2011-08-09 09:10:02	*葡萄糖	5.72	mmol/l	3-6.1	M	2011-08-09 09:41:32	C反应蛋白	2.6	mg/l	0-8	M	2011-08-09 09:41:32	凝血酶原时间(PT)	11.3	S	42991	M	2011-08-09 09:10:02
6	1000032987002	凝血酶原国际比值	1.04		0.72-1.29	M	2011-06-14 09:14:20	低密度脂蛋白	2.23	mmol/l	2.7-3.36	L	2011-06-18 11:44:27	部分凝血活酶时间	34.9	S	22-45	M	2011-06-14 09:14:20	*总胆固醇	3.4	mmol/l	42800	M	2011-06-18 11:44:27	D二聚体	643	ng/ml	0-500	H	2011-06-18 09:29:42	*葡萄糖	11.76	mmol/l	3-6.1	H	2011-06-18 11:44:27	C反应蛋白	67.4	mg/l	0-8	H	2011-06-14 09:49:43	凝血酶原时间(PT)	12	S	42991	M	2011-06-14 09:14:20
7	1000039617003	凝血酶原国际比值	0.94		0.72-1.29	M	2011-07-08 09:52:54	低密度脂蛋白	1.83	mmol/l	2.7-3.36	L	2011-07-12 18:34:31	部分凝血活酶时间	25.2	S	22-45	M	2011-07-08 09:52:54	*总胆固醇	3	mmol/l	42800	M	2011-07-12 18:34:31	D二聚体	484	ng/ml	0-256	H	2011-07-08 10:01:05	*葡萄糖	7.52	mmol/l	3-6.1	H	2011-07-09 09:10:27	C反应蛋白	2.4	mg/l	0-8	M	2011-07-08 10:21:43	凝血酶原时间(PT)	10.8	S	42991	M	2011-07-08 09:52:54
8	1000039729002	凝血酶原国际比值	0.95		0.72-1.29	M	2011-03-22 11:14:26	低密度脂蛋白	2.18	mmol/l	2.7-3.36	L	2011-03-22 10:06:57	部分凝血活酶时间	23.9	S	22-45	M	2011-03-22 11:14:26	*总胆固醇	3.52	mmol/l	42800	M	2011-03-22 10:06:57	D二聚体	1043	ng/ml	0-500	H	2011-03-29 11:48:12	*葡萄糖	4.72	mmol/l	3-6.1	M	2011-03-22 10:06:57	C反应蛋白	12.7	mg/l	0-8	H	2011-03-22 12:15:07	凝血酶原时间(PT)	10.9	S	42991	M	2011-03-22 11:14:26
9	1000039729003	凝血酶原国际比值	1.04		0.72-1.29	M	2011-05-14 08:43:05	低密度脂蛋白	2	mmol/l	2.7-3.36	L	2011-05-14 09:51:15	部分凝血活酶时间	23.5	S	22-45	M	2011-05-14 08:43:05	*总胆固醇	3.67	mmol/l	42800	M	2011-05-14 09:51:15	D二聚体	292	ng/ml	0-500	M	2011-05-14 08:43:05	*葡萄糖	4.17	mmol/l	3-6.1	M	2011-05-14 09:51:15	C反应蛋白	8.1	mg/l	0-8	H	2011-05-14 10:22:52	凝血酶原时间(PT)	12	S	42991	M	2011-05-14 08:43:05
10	1000042381002	凝血酶原国际比值	0.87		0.7-1.3	M	2016-09-20 11:34:34	低密度脂蛋白	3.13	mmol/l	健康人群:1.8-3.36;心脑血管疾病危险人群:<2.59	M	2016-09-20 11:49:23	部分凝血活酶时间	26.9	S	20-40	M	2016-09-20 11:34:34	*总胆固醇	4.92	mmol/l	3.6-5.17	M	2016-09-20 11:49:23	D二聚体	170	ng/ml	0-115	H	2016-09-20 11:34:34	*葡萄糖	4.2	mmol/l	3.89-6.11	M	2016-09-20 11:49:23	C反应蛋白	0.97	mg/l	0-8	M	2016-09-20 11:49:23	凝血酶原时间(PT)	10	S	42992	M	2016-09-20 11:34:34
11	1000042724005	凝血酶原国际比值	1.12		0.7-1.3	M	2017-01-07 11:27:58	低密度脂蛋白	2.58	mmol/l	健康人群:1.8-3.36;心脑血管疾病危险人群:<2.59	M	2017-01-07 10:27:23	部分凝血活酶时间	26	S	20-40	M	2017-01-07 11:27:58	*总胆固醇	5.21	mmol/l	3.6-5.17	H	2017-01-07 10:27:23	D二聚体	100	ng/ml	0-115	M	2017-01-07 11:27:58	*葡萄糖	7.46	mmol/l	3.89-6.11	H	2017-01-07 10:27:23	C反应蛋白	32.47	mg/l	0-8	H	2017-01-18 12:49:37	凝血酶原时间(PT)	12.8	S	42992	M	2017-01-07 11:27:58
12	1000045397002	凝血酶原国际比值	1.02		0.7-1.3	M	2016-07-05 11:01:29	低密度脂蛋白	3	mmol/l	健康人群:1.8-3.36;心脑血管疾病危险人群:<2.59	M	2016-07-05 10:32:46	部分凝血活酶时间	28.7	S	20-40	M	2016-07-05 11:01:29	*总胆固醇	5.15	mmol/l	3.6-5.17	M	2016-07-05 10:32:46	D二聚体	760	ng/ml	0-115	H	2016-07-05 11:01:29	*葡萄糖	4.28	mmol/l	3.89-6.11	M	2016-07-05 10:32:46	C反应蛋白	8.78	mg/l	0-8	H	2016-07-05 10:32:46	凝血酶原时间(PT)	11.7	S	42992	M	2016-07-05 11:01:29
13	1000047260002	凝血酶原国际比值	1.07		0.72-1.29	M	2011-06-14 09:05:41	低密度脂蛋白	3.92	mmol/l	2.7-3.36	H	2011-06-14 09:44:25	部分凝血活酶时间	32.8	S	22-45	M	2011-06-14 09:05:41	*总胆固醇	5.37	mmol/l	42800	M	2011-06-14 09:44:25	D二聚体	1157	ng/ml	0-500	H	2011-06-14 10:43:32	*葡萄糖	3.89	mmol/l	3-6.1	M	2011-06-14 09:44:25	C反应蛋白	36.4	mg/l	0-8	H	2011-06-14 09:26:11	凝血酶原时间(PT)	12.3	S	42991	M	2011-06-14 09:05:41
14	1000048842002	凝血酶原国际比值	1.03		0.72-1.29	M	2011-08-09 09:25:13	低密度脂蛋白	1.27	mmol/l	2.7-3.36	L	2011-08-09 09:39:05	部分凝血活酶时间	30.5	S	22-45	M	2011-08-09 09:25:13	*总胆固醇	2.81	mmol/l	42800	L	2011-08-09 09:39:05	D二聚体	241	ng/ml	0-256	M	2011-08-12 07:25:53	*葡萄糖	9.21	mmol/l	3-6.1	H	2011-08-09 09:39:05	C反应蛋白	43.8	mg/l	0-8	H	2011-08-09 09:39:05	凝血酶原时间(PT)	11.9	S	42991	M	2011-08-09 09:25:13
15	1000057656002	凝血酶原国际比值	1.04		0.7-1.3	M	2015-07-07 11:42:12	低密度脂蛋白	2.39	mmol/l	健康人群:1.8-3.36;心脑血管疾病危险人群:<2.59	M	2015-07-07 10:58:37	部分凝血活酶时间	24	S	22-45	M	2015-07-07 11:42:12	*总胆固醇	3.8	mmol/l	3.6-5.17	M	2015-07-07 10:58:37	D二聚体	60	ng/ml	0-115	M	2015-07-07 11:55:41	*葡萄糖	7.07	mmol/l	3.89-6.11	H	2015-07-07 10:58:37	C反应蛋白	3	mg/l	0-8	M	2015-07-07 11:27:15	凝血酶原时间(PT)	12	S	42992	M	2015-07-07 11:42:12
16	1000059759003	凝血酶原国际比值	0.95		0.7-1.3	M	2015-03-10 12:00:30	低密度脂蛋白	3.01	mmol/l	健康人群:1.8-3.36;心脑血管疾病危险人群:<2.59	M	2015-03-10 11:35:36	部分凝血活酶时间	27.5	S	22-45	M	2015-03-10 12:00:30	*总胆固醇	5.56	mmol/l	3.6-5.17	H	2015-03-10 11:35:36	D二聚体	140	ng/ml	0-115	H	2015-03-10 12:13:11	*葡萄糖	5.65	mmol/l	3.89-6.11	M	2015-03-10 11:35:36	C反应蛋白	0.37	mg/l	0-8	M	2015-03-10 11:40:29	凝血酶原时间(PT)	10.9	S	42992	M	2015-03-10 12:00:30
17	1000060188004	凝血酶原国际比值	0.99		0.7-1.3	M	2016-06-15 13:06:03	低密度脂蛋白	3.64	mmol/l	健康人群:1.8-3.36;心脑血管疾病危险人群:<2.59	M	2016-06-15 13:21:34	部分凝血活酶时间	28.9	S	20-40	M	2016-06-15 13:06:03	*总胆固醇	5.91	mmol/l	3.6-5.17	H	2016-06-15 13:21:34	D二聚体	40	ng/ml	0-115	M	2016-06-15 13:06:03	*葡萄糖	4.93	mmol/l	3.89-6.11	M	2016-06-15 13:21:34	C反应蛋白	1.64	mg/l	0-8	M	2016-06-15 13:21:59	凝血酶原时间(PT)	11.4	S	42992	M	2016-06-15 13:06:03
18	1000062098002	凝血酶原国际比值	1.03		0.72-1.29	M	2011-06-08 09:32:04	低密度脂蛋白	4.02	mmol/l	2.7-3.36	H	2011-06-08 09:31:47	部分凝血活酶时间	31.6	S	22-45	M	2011-06-08 09:32:04	*总胆固醇	4.84	mmol/l	42800	M	2011-06-08 09:31:47	D二聚体	188	ng/ml	0-500	M	2011-06-08 09:32:04	*葡萄糖	4.39	mmol/l	3-6.1	M	2011-06-08 09:31:47	C反应蛋白	3.6	mg/l	0-8	M	2011-06-08 09:33:54	凝血酶原时间(PT)	11.9	S	42991	M	2011-06-08 09:32:04
19	1000065253001	凝血酶原国际比值	0.98		0.72-1.29	M	2010-12-20 10:31:06	低密度脂蛋白	3.44	mmol/l	2.7-3.36	H	2010-12-20 10:07:03	部分凝血活酶时间	27	S	22-45	M	2010-12-20 09:34:19	*总胆固醇	5.35	mmol/l	42800	M	2010-12-20 10:07:03	D二聚体	363	ng/ml	0-500	M	2010-12-20 09:58:54	*葡萄糖	5.69	mmol/l	3-6.1	M	2010-12-20 10:07:03	C反应蛋白	6.71	mg/l	0-8	M	2010-12-20 09:27:02	凝血酶原时间(PT)	11.3	S	42991	M	2010-12-20 10:31:06
20	1000065835001	凝血酶原国际比值	0.95		0.72-1.29	M	2010-12-24 11:30:23	低密度脂蛋白	4.4	mmol/l	2.7-3.36	H	2010-12-24 11:46:23	部分凝血活酶时间	22.7	S	22-45	M	2010-12-24 11:30:23	*总胆固醇	6.54	mmol/l	42800	H	2010-12-24 11:46:23	D二聚体	219	ng/ml	0-500	M	2010-12-24 11:32:18	*葡萄糖	5.54	mmol/l	3-6.1	M	2010-12-24 11:46:23	C反应蛋白	1.49	mg/l	0-8	M	2010-12-24 15:27:44	凝血酶原时间(PT)	10.9	S	42991	M	2010-12-24 11:30:23
21	1000065971001	凝血酶原国际比值	0.91		0.72-1.29	M	2010-12-27 09:30:49	低密度脂蛋白	4.35	mmol/l	2.7-3.36	H	2010-12-27 10:10:39	部分凝血活酶时间	24.4	S	22-45	M	2010-12-27 09:30:49	*总胆固醇	5.69	mmol/l	42800	M	2010-12-27 10:10:39	D二聚体	408	ng/ml	0-500	M	2010-12-27 08:55:04	*葡萄糖	6.11	mmol/l	3-6.1	H	2010-12-27 10:10:39	C反应蛋白	29.5	mg/l	0-8	H	2010-12-27 09:23:17	凝血酶原时间(PT)	10.5	S	42991	M	2010-12-27 09:30:49
22	1000066148001	凝血酶原国际比值	1.03		0.72-1.29	M	2010-12-29 09:46:11	低密度脂蛋白	2.67	mmol/l	2.7-3.36	L	2010-12-29 09:21:22	部分凝血活酶时间	28.2	S	22-45	M	2010-12-29 09:46:11	*总胆固醇	4.21	mmol/l	42800	M	2010-12-29 09:21:22	D二聚体	821	ng/ml	0-500	H	2010-12-29 10:18:13	*葡萄糖	6.12	mmol/l	3-6.1	H	2010-12-29 09:21:22	C反应蛋白	94	mg/l	0-8	H	2010-12-29 10:30:34	凝血酶原时间(PT)	11.8	S	42991	M	2010-12-29 09:46:11
23	1000066298004	凝血酶原国际比值	1.04		0.7-1.3	M	2014-10-10 12:02:59	低密度脂蛋白	3.49	mmol/l	健康人群:1.8-3.36;心脑血管疾病危险人群:<2.59	M	2014-10-10 10:13:18	部分凝血活酶时间	31.7	S	22-45	M	2014-10-10 12:02:59	*总胆固醇	6.89	mmol/l	3.6-5.17	H	2014-10-10 10:13:18	D二聚体	60	ng/ml	0-115	M	2014-10-10 12:02:59	*葡萄糖	4.2	mmol/l	3.89-6.11	M	2014-10-10 10:13:18	C反应蛋白	2.1	mg/l	0-8	M	2014-10-10 10:13:18	凝血酶原时间(PT)	12	S	42992	M	2014-10-10 12:02:59
24	1000066341001	凝血酶原国际比值	1.17		0.72-1.29	M	2010-12-31 09:08:26	低密度脂蛋白	1.45	mmol/l	2.7-3.36	L	2010-12-31 09:12:51	部分凝血活酶时间	31.6	S	22-45	M	2010-12-31 09:08:26	*总胆固醇	3.01	mmol/l	42800	M	2010-12-31 09:12:51	D二聚体	525	ng/ml	0-500	H	2010-12-31 09:15:16	*葡萄糖	4.53	mmol/l	3-6.1	M	2010-12-31 09:12:51	C反应蛋白	68.1	mg/l	0-8	H	2010-12-31 14:40:06	凝血酶原时间(PT)	13.4	S	42991	H	2010-12-31 09:08:26
25	1000066367001	凝血酶原国际比值	0.97		0.72-1.29	M	2010-12-31 13:49:03	低密度脂蛋白	3.08	mmol/l	2.7-3.36	M	2011-01-05 09:46:13	部分凝血活酶时间	22.9	S	22-45	M	2010-12-31 13:49:03	*总胆固醇	4.39	mmol/l	42800	M	2011-01-05 09:46:13	D二聚体	430	ng/ml	0-500	M	2011-01-11 13:08:56	*葡萄糖	5.9	mmol/l	3-6.1	M	2011-01-05 09:46:13	C反应蛋白	3.37	mg/l	0-8	M	2010-12-31 15:43:40	凝血酶原时间(PT)	11.1	S	42991	M	2010-12-31 13:49:03
26	1000066549001	凝血酶原国际比值	1		0.72-1.29	M	2011-01-03 10:35:55	低密度脂蛋白	3.41	mmol/l	2.7-3.36	H	2011-01-03 10:05:34	部分凝血活酶时间	22.8	S	22-45	M	2011-01-03 10:35:55	*总胆固醇	5.01	mmol/l	42800	M	2011-01-03 10:05:34	D二聚体	529	ng/ml	0-500	H	2011-01-03 10:23:22	*葡萄糖	5.27	mmol/l	3-6.1	M	2011-01-03 10:05:34	C反应蛋白	6.38	mg/l	0-8	M	2011-01-03 10:09:03	凝血酶原时间(PT)	11.5	S	42991	M	2011-01-03 10:35:55
27	1000066798001	凝血酶原国际比值	0.96		0.72-1.29	M	2011-01-05 13:33:45	低密度脂蛋白	4.35	mmol/l	2.7-3.36	H	2011-01-05 13:26:31	部分凝血活酶时间	21.5	S	22-45	L	2011-01-05 13:33:45	*总胆固醇	6.05	mmol/l	42800	H	2011-01-05 13:26:31	D二聚体	31	ng/ml	0-500	M	2011-01-05 13:29:39	*葡萄糖	7.52	mmol/l	3-6.1	H	2011-01-05 13:26:31	C反应蛋白	7.01	mg/l	0-8	M	2011-01-05 15:29:29	凝血酶原时间(PT)	11	S	42991	M	2011-01-05 13:33:45
28	1000066966001	凝血酶原国际比值	1.06		0.72-1.29	M	2011-01-08 09:47:38	低密度脂蛋白	1.28	mmol/l	2.7-3.36	L	2011-01-08 09:50:08	部分凝血活酶时间	31.2	S	22-45	M	2011-01-08 09:47:38	*总胆固醇	3.34	mmol/l	42800	M	2011-01-08 09:50:08	D二聚体	344	ng/ml	0-500	M	2011-01-08 09:19:06	*葡萄糖	4.9	mmol/l	3-6.1	M	2011-01-08 09:50:08	C反应蛋白	37.4	mg/l	0-8	H	2011-01-08 10:12:15	凝血酶原时间(PT)	12.2	S	42991	M	2011-01-08 09:47:38
29	1000067216002	凝血酶原国际比值	0.9		0.72-1.29	M	2011-08-30 09:57:39	低密度脂蛋白	2.81	mmol/l	2.7-3.36	M	2011-08-30 09:19:01	部分凝血活酶时间	33.7	S	22-45	M	2011-08-30 09:57:39	*总胆固醇	4.94	mmol/l	42800	M	2011-08-30 09:19:01	D二聚体	43	ng/ml	0-256	M	2011-09-06 07:36:42	*葡萄糖	4.42	mmol/l	3-6.1	M	2011-08-30 09:19:01	C反应蛋白	7.1	mg/l	0-8	M	2011-08-30 09:19:01	凝血酶原时间(PT)	10.4	S	42991	M	2011-08-30 09:57:39
30	1000067366002	凝血酶原国际比值	0.99		0.72-1.29	M	2011-01-24 08:59:13	低密度脂蛋白	3.82	mmol/l	2.7-3.36	H	2011-01-24 09:37:30	部分凝血活酶时间	25.4	S	22-45	M	2011-01-24 08:59:13	*总胆固醇	5.31	mmol/l	42800	M	2011-01-24 09:37:30	D二聚体	150	ng/ml	0-500	M	2011-06-20 13:51:02	*葡萄糖	5.18	mmol/l	3-6.1	M	2011-01-24 09:37:30	C反应蛋白	6.95	mg/l	0-8	M	2011-01-24 09:41:43	凝血酶原时间(PT)	11.4	S	42991	M	2011-01-24 08:59:13
31	1000067796001	凝血酶原国际比值	1.09		0.72-1.29	M	2011-01-18 10:20:34	低密度脂蛋白	3.94	mmol/l	2.7-3.36	H	2011-01-18 10:01:25	部分凝血活酶时间	28.9	S	22-45	M	2011-01-18 10:20:34	*总胆固醇	5.89	mmol/l	42800	M	2011-01-18 10:01:25	D二聚体	257	ng/ml	0-500	M	2011-01-26 10:12:48	*葡萄糖	5.71	mmol/l	3-6.1	M	2011-01-18 10:01:25	C反应蛋白	36.5	mg/l	0-8	H	2011-01-19 09:26:22	凝血酶原时间(PT)	12.5	S	42991	M	2011-01-18 10:20:34
32	1000067977001	凝血酶原国际比值	0.95		0.72-1.29	M	2011-01-20 09:59:22	低密度脂蛋白	3.41	mmol/l	2.7-3.36	H	2011-01-20 09:41:45	部分凝血活酶时间	23.6	S	22-45	M	2011-01-20 09:59:22	*总胆固醇	5.47	mmol/l	42800	M	2011-01-20 09:41:45	D二聚体	905	ng/ml	0-500	H	2011-01-20 10:22:16	*葡萄糖	6.43	mmol/l	3-6.1	H	2011-01-20 09:41:45	C反应蛋白	20.4	mg/l	0-8	H	2011-01-20 09:35:44	凝血酶原时间(PT)	10.9	S	42991	M	2011-01-20 09:59:22
33	1000068002001	凝血酶原国际比值	0.99		0.72-1.29	M	2011-01-21 07:46:33	低密度脂蛋白	4.33	mmol/l	2.7-3.36	H	2011-01-21 08:05:53	部分凝血活酶时间	23.7	S	22-45	M	2011-01-21 07:46:33	*总胆固醇	5.96	mmol/l	42800	M	2011-01-21 08:05:53	D二聚体	408	ng/ml	0-500	M	2011-01-21 08:29:08	*葡萄糖	7.53	mmol/l	3-6.1	H	2011-01-21 08:05:53	C反应蛋白	97.7	mg/l	0-8	H	2011-01-21 10:02:44	凝血酶原时间(PT)	11.4	S	42991	M	2011-01-21 07:46:33
34	1000068413002	凝血酶原国际比值	1.05		0.7-1.3	M	2016-07-16 10:49:40	低密度脂蛋白	2.61	mmol/l	健康人群:1.8-3.36;心脑血管疾病危险人群:<2.59	M	2016-07-16 10:13:37	部分凝血活酶时间	32.3	S	22-45	M	2016-07-16 10:04:43	*总胆固醇	4.66	mmol/l	3.6-5.17	M	2016-07-16 10:13:37	D二聚体	32	ng/ml	0-115	M	2016-07-16 10:09:25	*葡萄糖	6.13	mmol/l	3.89-6.11	H	2016-07-16 10:13:37	C反应蛋白	8.93	mg/l	0-8	H	2016-08-01 09:32:12	凝血酶原时间(PT)	13	S	43023	M	2016-07-16 10:49:40
35	1000069147001	凝血酶原国际比值	0.94		0.72-1.29	M	2011-02-09 09:27:12	低密度脂蛋白	3.42	mmol/l	2.7-3.36	H	2011-02-09 09:37:38	部分凝血活酶时间	22.6	S	22-45	M	2011-02-09 09:27:12	*总胆固醇	5.56	mmol/l	42800	M	2011-02-09 09:37:38	D二聚体	642	ng/ml	0-500	H	2011-02-09 09:22:57	*葡萄糖	6.06	mmol/l	3-6.1	M	2011-02-09 09:37:38	C反应蛋白	6.77	mg/l	0-8	M	2011-02-09 12:49:57	凝血酶原时间(PT)	10.8	S	42991	M	2011-02-09 09:27:12
36	1000069307001	凝血酶原国际比值	0.89		0.72-1.29	M	2011-02-10 11:44:11	低密度脂蛋白	6.25	mmol/l	2.7-3.36	H	2011-02-10 11:10:05	部分凝血活酶时间	19.4	S	22-45	L	2011-02-10 14:05:17	*总胆固醇	8.21	mmol/l	42800	H	2011-02-10 11:10:05	D二聚体	136	ng/ml	0-500	M	2011-02-15 09:12:59	*葡萄糖	10.89	mmol/l	3-6.1	H	2011-02-10 11:10:05	C反应蛋白	2.89	mg/l	0-8	M	2011-02-11 11:17:20	凝血酶原时间(PT)	10.2	S	42991	M	2011-02-10 11:44:11
37	1000069315001	凝血酶原国际比值	1.01		0.72-1.29	M	2011-02-11 10:28:23	低密度脂蛋白	3.62	mmol/l	2.7-3.36	H	2011-02-11 09:53:22	部分凝血活酶时间	25	S	22-45	M	2011-02-11 10:28:23	*总胆固醇	5.01	mmol/l	42800	M	2011-02-11 09:53:22	D二聚体	279	ng/ml	0-500	M	2011-02-11 10:04:04	*葡萄糖	4.74	mmol/l	3-6.1	M	2011-02-11 09:53:22	C反应蛋白	5.76	mg/l	0-8	M	2011-02-11 11:37:43	凝血酶原时间(PT)	11.6	S	42991	M	2011-02-11 10:28:23
38	1000069581001	凝血酶原国际比值	1.03		0.72-1.29	M	2011-02-15 08:40:34	低密度脂蛋白	3.68	mmol/l	2.7-3.36	H	2011-02-15 10:33:38	部分凝血活酶时间	26	S	22-45	M	2011-02-15 08:40:34	*总胆固醇	5.8	mmol/l	42800	M	2011-02-15 10:33:38	D二聚体	992	ng/ml	0-500	H	2011-02-15 10:02:55	*葡萄糖	9.38	mmol/l	3-6.1	H	2011-02-15 10:33:38	C反应蛋白	30.5	mg/l	0-8	H	2011-02-15 10:34:44	凝血酶原时间(PT)	11.9	S	42991	M	2011-02-15 08:40:34
39	1000069615001	凝血酶原国际比值	0.9		0.72-1.29	M	2011-02-15 10:01:50	低密度脂蛋白	4.66	mmol/l	2.7-3.36	H	2011-02-15 10:43:43	部分凝血活酶时间	21.7	S	22-45	L	2011-02-15 10:01:50	*总胆固醇	6.7	mmol/l	42800	H	2011-02-15 10:43:43	D二聚体	981	ng/ml	0-500	H	2011-02-24 07:42:02	*葡萄糖	11.33	mmol/l	3-6.1	H	2011-02-15 10:43:43	C反应蛋白	5.43	mg/l	0-8	M	2011-02-21 16:24:52	凝血酶原时间(PT)	10.4	S	42991	M	2011-02-15 10:01:50
40	1000069926001	凝血酶原国际比值	0.99		0.72-1.29	M	2011-02-19 10:46:14	低密度脂蛋白	3.38	mmol/l	2.7-3.36	H	2011-02-19 10:05:49	部分凝血活酶时间	25.5	S	22-45	M	2011-02-19 10:46:14	*总胆固醇	5.09	mmol/l	42800	M	2011-02-19 10:05:49	D二聚体	448	ng/ml	0-500	M	2011-02-19 10:52:43	*葡萄糖	5.05	mmol/l	3-6.1	M	2011-02-19 10:05:49	C反应蛋白	52.2	mg/l	0-8	H	2011-02-19 10:44:29	凝血酶原时间(PT)	11.4	S	42991	M	2011-02-19 10:46:14
41	1000069928001	凝血酶原国际比值	0.99		0.72-1.29	M	2011-02-19 10:29:08	低密度脂蛋白	3.47	mmol/l	2.7-3.36	H	2011-02-19 10:05:44	部分凝血活酶时间	28.7	S	22-45	M	2011-02-19 10:29:08	*总胆固醇	5.38	mmol/l	42800	M	2011-02-19 10:05:44	D二聚体	230	ng/ml	0-500	M	2011-02-19 10:05:18	*葡萄糖	3.35	mmol/l	3-6.1	M	2011-02-19 10:05:44	C反应蛋白	3.23	mg/l	0-8	M	2011-02-19 10:43:19	凝血酶原时间(PT)	11.4	S	42991	M	2011-02-19 10:29:08
42	1000069932001	凝血酶原国际比值	1.01		0.72-1.29	M	2011-02-19 09:23:38	低密度脂蛋白	4.16	mmol/l	2.7-3.36	H	2011-02-19 09:49:56	部分凝血活酶时间	27	S	22-45	M	2011-02-19 09:23:38	*总胆固醇	6.24	mmol/l	42800	H	2011-02-19 09:49:57	D二聚体	1067	ng/ml	0-500	H	2011-02-19 10:06:53	*葡萄糖	6.33	mmol/l	3-6.1	H	2011-02-19 09:49:56	C反应蛋白	26	mg/l	0-8	H	2011-02-19 10:48:36	凝血酶原时间(PT)	11.6	S	42991	M	2011-02-19 09:23:38
43	1000069935001	凝血酶原国际比值	1.03		0.72-1.29	M	2011-02-19 09:19:38	低密度脂蛋白	3.16	mmol/l	2.7-3.36	M	2011-02-19 09:59:42	部分凝血活酶时间	20.8	S	22-45	L	2011-02-19 09:19:38	*总胆固醇	4.88	mmol/l	42800	M	2011-02-19 09:59:42	D二聚体	924	ng/ml	0-500	H	2011-02-19 11:11:39	*葡萄糖	7.42	mmol/l	3-6.1	H	2011-02-19 09:59:42	C反应蛋白	54.8	mg/l	0-8	H	2011-02-19 10:49:27	凝血酶原时间(PT)	11.9	S	42991	M	2011-02-19 09:19:38
44	1000070119001	凝血酶原国际比值	0.97		0.72-1.29	M	2011-02-22 09:43:24	低密度脂蛋白	3.03	mmol/l	2.7-3.36	M	2011-02-22 10:44:08	部分凝血活酶时间	31.7	S	22-45	M	2011-02-22 09:43:24	*总胆固醇	4.52	mmol/l	42800	M	2011-02-22 10:44:08	D二聚体	213	ng/ml	0-500	M	2011-02-22 09:26:10	*葡萄糖	5.15	mmol/l	3-6.1	M	2011-02-22 10:44:08	C反应蛋白	115	mg/l	0-8	H	2011-02-22 10:32:46	凝血酶原时间(PT)	11.1	S	42991	M	2011-02-22 09:43:24
45	1000070123001	凝血酶原国际比值	0.92		0.72-1.29	M	2011-02-21 12:08:28	低密度脂蛋白	1.18	mmol/l	2.7-3.36	L	2011-02-21 11:57:28	部分凝血活酶时间	21.6	S	22-45	L	2011-02-21 12:08:28	*总胆固醇	4.19	mmol/l	42800	M	2011-02-21 11:57:28	D二聚体	450	ng/ml	0-500	M	2011-02-24 07:47:03	*葡萄糖	5.13	mmol/l	3-6.1	M	2011-02-21 11:57:28	C反应蛋白	2.69	mg/l	0-8	M	2011-02-23 08:40:03	凝血酶原时间(PT)	10.6	S	42991	M	2011-02-21 12:08:28
46	1000070256001	凝血酶原国际比值	0.91		0.72-1.29	M	2011-02-23 12:03:22	低密度脂蛋白	4.85	mmol/l	2.7-3.36	H	2011-02-23 09:20:23	部分凝血活酶时间	24.5	S	22-45	M	2011-02-23 12:59:08	*总胆固醇	6.71	mmol/l	42800	H	2011-02-23 09:20:23	D二聚体	1380	ng/ml	0-500	H	2011-02-26 09:24:53	*葡萄糖	4.5	mmol/l	3-6.1	M	2011-02-23 09:20:23	C反应蛋白	3.87	mg/l	0-8	M	2011-02-23 09:29:59	凝血酶原时间(PT)	10.5	S	42991	M	2011-02-23 12:03:22
47	1000070256002	凝血酶原国际比值	1.02		0.72-1.29	M	2011-05-17 09:35:54	低密度脂蛋白	4.38	mmol/l	2.7-3.36	H	2011-05-17 09:17:22	部分凝血活酶时间	26.1	S	22-45	M	2011-05-17 09:35:54	*总胆固醇	5.94	mmol/l	42800	M	2011-05-17 09:17:22	D二聚体	0	ng/ml	0-500	M	2011-05-19 07:09:07	*葡萄糖	5.25	mmol/l	3-6.1	M	2011-05-17 09:17:22	C反应蛋白	4.1	mg/l	0-8	M	2011-05-18 08:42:24	凝血酶原时间(PT)	11.7	S	42991	M	2011-05-17 09:35:54
48	1000070387001	凝血酶原国际比值	0.9		0.72-1.29	M	2011-02-24 09:57:19	低密度脂蛋白	4.47	mmol/l	2.7-3.36	H	2011-02-24 09:55:22	部分凝血活酶时间	22.9	S	22-45	M	2011-02-24 09:57:19	*总胆固醇	6.24	mmol/l	42800	H	2011-02-24 09:55:22	D二聚体	351	ng/ml	0-500	M	2011-02-24 10:25:26	*葡萄糖	5.49	mmol/l	3-6.1	M	2011-02-24 09:55:22	C反应蛋白	5	mg/l	0-8	M	2011-02-24 10:06:20	凝血酶原时间(PT)	10.4	S	42991	M	2011-02-24 09:57:19
49	1000070447004	凝血酶原国际比值	0.92		0.7-1.3	M	2016-07-12 09:54:43	低密度脂蛋白	3.41	mmol/l	健康人群:1.8-3.36;心脑血管疾病危险人群:<2.59	M	2016-07-12 10:15:01	部分凝血活酶时间	21.6	S	20-40	M	2016-07-12 10:32:01	*总胆固醇	5.46	mmol/l	3.6-5.17	H	2016-07-12 10:15:01	D二聚体	1580	ng/ml	0-115	H	2016-07-12 10:32:01	*葡萄糖	5.61	mmol/l	3.89-6.11	M	2016-07-12 10:15:01	C反应蛋白	119.7	mg/l	0-8	H	2016-07-17 09:57:30	凝血酶原时间(PT)	10.6	S	42992	M	2016-07-12 09:54:43
50	1000070475002	凝血酶原国际比值	1.1		0.72-1.29	M	2011-07-30 09:23:50	低密度脂蛋白	1.94	mmol/l	2.7-3.36	L	2011-07-30 08:55:59	部分凝血活酶时间	30.3	S	22-45	M	2011-07-30 09:23:50	*总胆固醇	3.48	mmol/l	42800	M	2011-07-30 08:55:59	D二聚体	372	ng/ml	0-256	H	2011-08-06 07:41:34	*葡萄糖	4.86	mmol/l	3-6.1	M	2011-07-30 08:55:59	C反应蛋白	84.8	mg/l	0-8	H	2011-07-30 09:08:28	凝血酶原时间(PT)	12.6	S	42991	M	2011-07-30 09:23:50
51	1000070763001	凝血酶原国际比值	1.08		0.72-1.29	M	2011-02-27 09:18:37	低密度脂蛋白	2.6	mmol/l	2.7-3.36	L	2011-02-27 09:30:42	部分凝血活酶时间	24.9	S	22-45	M	2011-02-27 09:18:37	*总胆固醇	4.5	mmol/l	42800	M	2011-02-27 09:30:42	D二聚体	540	ng/ml	0-500	H	2011-02-27 09:19:21	*葡萄糖	4.96	mmol/l	3-6.1	M	2011-02-27 09:30:42	C反应蛋白	9.5	mg/l	0-8	H	2011-02-27 11:43:19	凝血酶原时间(PT)	12.4	S	42991	M	2011-02-27 09:18:37
52	1000070871001	凝血酶原国际比值	0.91		0.72-1.29	M	2011-03-01 10:33:46	低密度脂蛋白	3.26	mmol/l	2.7-3.36	M	2011-03-01 10:25:17	部分凝血活酶时间	23.4	S	22-45	M	2011-03-01 10:33:46	*总胆固醇	5.11	mmol/l	42800	M	2011-03-01 10:25:17	D二聚体	729	ng/ml	0-500	H	2011-03-04 07:33:50	*葡萄糖	4.71	mmol/l	3-6.1	M	2011-03-01 10:25:17	C反应蛋白	2.17	mg/l	0-8	M	2011-03-02 16:14:38	凝血酶原时间(PT)	10.5	S	42991	M	2011-03-01 10:33:46
53	1000071503001	凝血酶原国际比值	0.92		0.72-1.29	M	2011-03-08 10:07:09	低密度脂蛋白	3.74	mmol/l	2.7-3.36	H	2011-03-08 09:54:25	部分凝血活酶时间	26.8	S	22-45	M	2011-03-08 10:07:09	*总胆固醇	5.53	mmol/l	42800	M	2011-03-08 09:54:25	D二聚体	523	ng/ml	0-500	H	2011-03-11 07:34:29	*葡萄糖	4.37	mmol/l	3-6.1	M	2011-03-08 09:54:25	C反应蛋白	3.88	mg/l	0-8	M	2011-03-08 09:57:28	凝血酶原时间(PT)	10.6	S	42991	M	2011-03-08 10:07:09
54	1000071529001	凝血酶原国际比值	0.9		0.72-1.29	M	2011-03-09 09:59:09	低密度脂蛋白	3.03	mmol/l	2.7-3.36	M	2011-03-09 10:22:30	部分凝血活酶时间	22.9	S	22-45	M	2011-03-09 09:59:09	*总胆固醇	4.91	mmol/l	42800	M	2011-03-09 10:22:30	D二聚体	7550	ng/ml	0-500	H	2011-03-15 08:14:04	*葡萄糖	6.36	mmol/l	3-6.1	H	2011-03-09 10:22:30	C反应蛋白	61.1	mg/l	0-8	H	2011-03-09 10:41:37	凝血酶原时间(PT)	10.4	S	42991	M	2011-03-09 09:59:09
55	1000071696001	凝血酶原国际比值	0.87		0.72-1.29	M	2011-03-09 12:17:08	低密度脂蛋白	3.34	mmol/l	2.7-3.36	M	2011-03-09 12:50:12	部分凝血活酶时间	23.3	S	22-45	M	2011-03-09 12:17:08	*总胆固醇	5.67	mmol/l	42800	M	2011-03-09 12:50:12	D二聚体	980	ng/ml	0-500	H	2011-03-15 07:17:13	*葡萄糖	4.54	mmol/l	3-6.1	M	2011-03-09 12:50:12	C反应蛋白	3.27	mg/l	0-8	M	2011-03-10 09:53:16	凝血酶原时间(PT)	10	S	42991	M	2011-03-09 12:17:08
56	1000071767001	凝血酶原国际比值	1.11		0.72-1.29	M	2011-03-10 09:14:05	低密度脂蛋白	2.72	mmol/l	2.7-3.36	M	2011-03-10 09:09:44	部分凝血活酶时间	28.5	S	22-45	M	2011-03-10 09:14:05	*总胆固醇	4.38	mmol/l	42800	M	2011-03-10 09:09:44	D二聚体	1154	ng/ml	0-500	H	2011-03-10 09:31:50	*葡萄糖	8.11	mmol/l	3-6.1	H	2011-03-10 09:09:44	C反应蛋白	2.93	mg/l	0-8	M	2011-03-10 10:02:52	凝血酶原时间(PT)	12.8	S	42991	M	2011-03-10 09:14:05
57	1000071913001	凝血酶原国际比值	1.03		0.72-1.29	M	2011-03-12 10:20:14	低密度脂蛋白	2.34	mmol/l	2.7-3.36	L	2011-03-12 08:58:33	部分凝血活酶时间	24.1	S	22-45	M	2011-03-12 10:20:14	*总胆固醇	4	mmol/l	42800	M	2011-03-12 08:58:33	D二聚体	450	ng/ml	0-500	M	2011-03-12 10:26:19	*葡萄糖	6.89	mmol/l	3-6.1	H	2011-03-12 08:58:33	C反应蛋白	27.7	mg/l	0-8	H	2011-03-12 09:49:49	凝血酶原时间(PT)	11.8	S	42991	M	2011-03-12 10:20:14
58	1000072171001	凝血酶原国际比值	0.95		0.72-1.29	M	2011-03-15 11:39:40	低密度脂蛋白	4.65	mmol/l	2.7-3.36	H	2011-03-15 11:00:27	部分凝血活酶时间	23.3	S	22-45	M	2011-03-15 11:39:40	*总胆固醇	6.8	mmol/l	42800	H	2011-03-15 11:00:27	D二聚体	240	ng/ml	0-500	M	2011-03-20 21:26:06	*葡萄糖	5.69	mmol/l	3-6.1	M	2011-03-15 11:00:27	C反应蛋白	3.85	mg/l	0-8	M	2011-03-16 11:00:25	凝血酶原时间(PT)	10.9	S	42991	M	2011-03-15 11:39:40
59	1000072250001	凝血酶原国际比值	0.98		0.72-1.29	M	2011-03-16 10:11:47	低密度脂蛋白	7.84	mmol/l	2.7-3.36	H	2011-03-16 10:12:00	部分凝血活酶时间	22.3	S	22-45	M	2011-03-16 11:46:11	*总胆固醇	9.77	mmol/l	42800	H	2011-03-16 10:12:00	D二聚体	243	ng/ml	0-500	M	2011-03-16 11:16:34	*葡萄糖	4.32	mmol/l	3-6.1	M	2011-03-16 10:12:00	C反应蛋白	1.89	mg/l	0-8	M	2011-03-16 10:46:55	凝血酶原时间(PT)	11.3	S	42991	M	2011-03-16 10:11:47
60	1000072373001	凝血酶原国际比值	1.04		0.72-1.29	M	2011-03-17 09:19:29	低密度脂蛋白	3.4	mmol/l	2.7-3.36	H	2011-03-17 09:44:40	部分凝血活酶时间	24.4	S	22-45	M	2011-03-17 09:19:29	*总胆固醇	5.39	mmol/l	42800	M	2011-03-17 09:44:40	D二聚体	6489	ng/ml	0-500	H	2011-03-17 10:54:58	*葡萄糖	5.78	mmol/l	3-6.1	M	2011-03-17 09:44:40	C反应蛋白	28	mg/l	0-8	H	2011-03-17 10:30:53	凝血酶原时间(PT)	12	S	42991	M	2011-03-17 09:19:29
61	1000072472001	凝血酶原国际比值	1.03		0.72-1.29	M	2011-03-18 09:09:51	低密度脂蛋白	4.08	mmol/l	2.7-3.36	H	2011-03-18 09:08:09	部分凝血活酶时间	26.6	S	22-45	M	2011-03-18 09:09:51	*总胆固醇	6.16	mmol/l	42800	H	2011-03-18 09:08:09	D二聚体	597	ng/ml	0-500	H	2011-03-18 09:35:02	*葡萄糖	5.65	mmol/l	3-6.1	M	2011-03-18 09:08:09	C反应蛋白	126	mg/l	0-8	H	2011-03-18 12:15:30	凝血酶原时间(PT)	11.8	S	42991	M	2011-03-18 09:09:51
62	1000072472002	凝血酶原国际比值	1.02		0.72-1.29	M	2011-04-23 09:11:01	低密度脂蛋白	3.01	mmol/l	2.7-3.36	M	2011-04-21 19:26:48	部分凝血活酶时间	32.7	S	22-45	M	2011-04-23 09:11:01	*总胆固醇	4.5	mmol/l	42800	M	2011-04-21 19:26:48	D二聚体	292	ng/ml	0-500	M	2011-04-21 19:21:02	*葡萄糖	5.15	mmol/l	3-6.1	M	2011-04-21 19:26:48	C反应蛋白	76.3	mg/l	0-8	H	2011-04-21 19:28:03	凝血酶原时间(PT)	11.7	S	42991	M	2011-04-23 09:11:01
63	1000072685001	凝血酶原国际比值	0.92		0.72-1.29	M	2011-03-21 09:26:13	低密度脂蛋白	4.62	mmol/l	2.7-3.36	H	2011-03-21 09:53:28	部分凝血活酶时间	22.5	S	22-45	M	2011-03-21 09:26:13	*总胆固醇	5.81	mmol/l	42800	M	2011-03-21 09:53:28	D二聚体	339	ng/ml	0-500	M	2011-03-23 20:06:31	*葡萄糖	6.47	mmol/l	3-6.1	H	2011-03-21 09:53:28	C反应蛋白	33.8	mg/l	0-8	H	2011-03-21 10:29:23	凝血酶原时间(PT)	10.6	S	42991	M	2011-03-21 09:26:13
64	1000072761001	凝血酶原国际比值	0.93		0.72-1.29	M	2011-03-22 08:54:46	低密度脂蛋白	3.34	mmol/l	2.7-3.36	M	2011-03-22 10:03:55	部分凝血活酶时间	25.2	S	22-45	M	2011-03-22 08:54:46	*总胆固醇	4.91	mmol/l	42800	M	2011-03-22 10:03:55	D二聚体	282	ng/ml	0-500	M	2011-03-22 10:17:33	*葡萄糖	5.11	mmol/l	3-6.1	M	2011-03-22 10:03:55	C反应蛋白	4.74	mg/l	0-8	M	2011-03-22 12:26:39	凝血酶原时间(PT)	10.7	S	42991	M	2011-03-22 08:54:46
65	1000072792001	凝血酶原国际比值	0.94		0.72-1.29	M	2011-03-22 10:38:35	低密度脂蛋白	6.05	mmol/l	2.7-3.36	H	2011-03-22 10:01:28	部分凝血活酶时间	25.1	S	22-45	M	2011-03-22 10:38:35	*总胆固醇	7.43	mmol/l	42800	H	2011-03-22 10:01:28	D二聚体	254	ng/ml	0-500	M	2011-03-29 07:44:50	*葡萄糖	4.89	mmol/l	3-6.1	M	2011-03-22 10:01:28	C反应蛋白	134	mg/l	0-8	H	2011-03-23 11:20:10	凝血酶原时间(PT)	10.8	S	42991	M	2011-03-22 10:38:35
66	1000072820001	凝血酶原国际比值	0.94		0.72-1.29	M	2011-03-22 10:38:50	低密度脂蛋白	3.72	mmol/l	2.7-3.36	H	2011-03-22 09:54:48	部分凝血活酶时间	22.2	S	22-45	M	2011-03-22 10:38:50	*总胆固醇	5.24	mmol/l	42800	M	2011-03-22 09:54:48	D二聚体	5051	ng/ml	0-500	H	2011-03-24 08:34:36	*葡萄糖	4.63	mmol/l	3-6.1	M	2011-03-22 09:54:48	C反应蛋白	3.65	mg/l	0-8	M	2011-03-23 11:34:45	凝血酶原时间(PT)	10.8	S	42991	M	2011-03-22 10:38:50
67	1000073173001	凝血酶原国际比值	0.99		0.72-1.29	M	2011-03-26 09:05:05	低密度脂蛋白	2.88	mmol/l	2.7-3.36	M	2011-03-26 09:50:54	部分凝血活酶时间	33.6	S	22-45	M	2011-03-26 09:05:05	*总胆固醇	4.41	mmol/l	42800	M	2011-03-26 09:50:54	D二聚体	575	ng/ml	0-500	H	2011-03-26 09:06:54	*葡萄糖	5.41	mmol/l	3-6.1	M	2011-03-26 09:50:54	C反应蛋白	34.8	mg/l	0-8	H	2011-03-26 10:04:04	凝血酶原时间(PT)	11.4	S	42991	M	2011-03-26 09:05:05
68	1000073315001	凝血酶原国际比值	0.96		0.72-1.29	M	2011-03-27 08:59:08	低密度脂蛋白	4.36	mmol/l	2.7-3.36	H	2011-03-27 09:25:55	部分凝血活酶时间	25.9	S	22-45	M	2011-03-27 08:59:08	*总胆固醇	5.84	mmol/l	42800	M	2011-03-27 09:25:55	D二聚体	929	ng/ml	0-500	H	2011-03-27 09:31:24	*葡萄糖	5.11	mmol/l	3-6.1	M	2011-03-27 09:25:55	C反应蛋白	47.1	mg/l	0-8	H	2011-03-27 10:03:46	凝血酶原时间(PT)	11	S	42991	M	2011-03-27 08:59:08
69	1000073676001	凝血酶原国际比值	0.96		0.72-1.29	M	2011-03-31 09:59:07	低密度脂蛋白	5.55	mmol/l	2.7-3.36	H	2011-03-31 09:37:24	部分凝血活酶时间	18.1	S	22-45	L	2011-03-31 09:59:07	*总胆固醇	8.04	mmol/l	42800	H	2011-03-31 09:37:24	D二聚体	811	ng/ml	0-500	H	2011-04-12 13:09:33	*葡萄糖	5.39	mmol/l	3-6.1	M	2011-03-31 09:37:24	C反应蛋白	3.08	mg/l	0-8	M	2011-03-31 10:39:25	凝血酶原时间(PT)	11	S	42991	M	2011-03-31 09:59:07
70	1000073700001	凝血酶原国际比值	1.08		0.72-1.29	M	2011-03-31 10:25:17	低密度脂蛋白	3.4	mmol/l	2.7-3.36	H	2011-03-31 10:00:40	部分凝血活酶时间	22.7	S	22-45	M	2011-03-31 10:25:17	*总胆固醇	4.7	mmol/l	42800	M	2011-03-31 10:00:40	D二聚体	286	ng/ml	0-500	M	2011-03-31 11:01:02	*葡萄糖	4.77	mmol/l	3-6.1	M	2011-03-31 10:00:40	C反应蛋白	1.04	mg/l	0-8	M	2011-03-31 10:40:11	凝血酶原时间(PT)	12.4	S	42991	M	2011-03-31 10:25:17
71	1000073953001	凝血酶原国际比值	0.99		0.72-1.29	M	2011-04-03 09:11:51	低密度脂蛋白	2.29	mmol/l	2.7-3.36	L	2011-04-03 09:33:36	部分凝血活酶时间	24.4	S	22-45	M	2011-04-03 09:11:51	*总胆固醇	3.84	mmol/l	42800	M	2011-04-03 09:33:36	D二聚体	856	ng/ml	0-500	H	2011-04-03 09:36:51	*葡萄糖	5.4	mmol/l	3-6.1	M	2011-04-03 09:33:36	C反应蛋白	13.5	mg/l	0-8	H	2011-04-03 11:28:23	凝血酶原时间(PT)	11.4	S	42991	M	2011-04-03 09:11:51
72	1000073975001	凝血酶原国际比值	0.95		0.72-1.29	M	2011-04-03 09:13:51	低密度脂蛋白	4.39	mmol/l	2.7-3.36	H	2011-04-03 09:30:22	部分凝血活酶时间	27.5	S	22-45	M	2011-04-03 09:13:51	*总胆固醇	6.39	mmol/l	42800	H	2011-04-03 09:30:22	D二聚体	1152	ng/ml	0-500	H	2011-04-03 09:40:06	*葡萄糖	5.02	mmol/l	3-6.1	M	2011-04-03 09:30:22	C反应蛋白	28.4	mg/l	0-8	H	2011-04-03 11:26:52	凝血酶原时间(PT)	10.9	S	42991	M	2011-04-03 09:13:51
73	1000074251001	凝血酶原国际比值	1.02		0.72-1.29	M	2011-04-07 11:23:13	低密度脂蛋白	4.05	mmol/l	2.7-3.36	H	2011-04-07 09:24:16	部分凝血活酶时间	26	S	22-45	M	2011-04-07 11:23:13	*总胆固醇	6.74	mmol/l	42800	H	2011-04-07 09:24:16	D二聚体	227	ng/ml	0-500	M	2011-04-07 11:27:41	*葡萄糖	5.7	mmol/l	3-6.1	M	2011-04-07 09:24:16	C反应蛋白	101.7	mg/l	0-8	H	2011-04-18 17:29:39	凝血酶原时间(PT)	11.7	S	42991	M	2011-04-07 11:23:13
74	1000074283001	凝血酶原国际比值	0.9		0.72-1.29	M	2011-04-07 09:12:35	低密度脂蛋白	3.72	mmol/l	2.7-3.36	H	2011-04-07 09:57:57	部分凝血活酶时间	22.4	S	22-45	M	2011-04-07 09:12:35	*总胆固醇	5.42	mmol/l	42800	M	2011-04-07 09:57:57	D二聚体	2333	ng/ml	0-500	H	2011-04-12 09:10:31	*葡萄糖	10.38	mmol/l	3-6.1	H	2011-04-07 09:57:57	C反应蛋白	3.97	mg/l	0-8	M	2011-04-07 09:55:52	凝血酶原时间(PT)	10.4	S	42991	M	2011-04-07 09:12:35
75	1000074351001	凝血酶原国际比值	0.94		0.72-1.29	M	2011-04-08 09:24:47	低密度脂蛋白	4.01	mmol/l	2.7-3.36	H	2011-04-08 09:13:02	部分凝血活酶时间	24.4	S	22-45	M	2011-04-08 09:24:47	*总胆固醇	5.62	mmol/l	42800	M	2011-04-08 09:13:02	D二聚体	1161	ng/ml	0-500	H	2011-04-08 13:35:58	*葡萄糖	5.01	mmol/l	3-6.1	M	2011-04-08 09:13:02	C反应蛋白	7.7	mg/l	0-8	M	2011-04-08 10:18:44	凝血酶原时间(PT)	10.8	S	42991	M	2011-04-08 09:24:47
76	1000074448001	凝血酶原国际比值	0.99		0.72-1.29	M	2011-04-08 11:34:03	低密度脂蛋白	5.54	mmol/l	2.7-3.36	H	2011-04-08 10:54:44	部分凝血活酶时间	21.4	S	22-45	L	2011-04-08 11:34:03	*总胆固醇	7.24	mmol/l	42800	H	2011-04-08 10:54:44	D二聚体	9140	ng/ml	0-500	H	2011-04-12 09:08:56	*葡萄糖	4.56	mmol/l	3-6.1	M	2011-04-08 10:54:44	C反应蛋白	3.48	mg/l	0-8	M	2011-04-08 16:43:19	凝血酶原时间(PT)	11.4	S	42991	M	2011-04-08 11:34:03
77	1000074470001	凝血酶原国际比值	1.01		0.72-1.29	M	2011-04-09 09:51:45	低密度脂蛋白	3.71	mmol/l	2.7-3.36	H	2011-04-09 09:33:53	部分凝血活酶时间	21.9	S	22-45	L	2011-04-09 09:51:45	*总胆固醇	5	mmol/l	42800	M	2011-04-09 09:33:53	D二聚体	896	ng/ml	0-500	H	2011-04-13 07:29:42	*葡萄糖	7.49	mmol/l	3-6.1	H	2011-04-09 09:33:53	C反应蛋白	11.5	mg/l	0-8	H	2011-04-09 11:27:05	凝血酶原时间(PT)	11.6	S	42991	M	2011-04-09 09:51:45
78	1000074576001	凝血酶原国际比值	0.9		0.72-1.29	M	2011-04-09 11:24:19	低密度脂蛋白	2.78	mmol/l	2.7-3.36	M	2011-04-09 11:46:40	部分凝血活酶时间	19.1	S	22-45	L	2011-04-09 11:24:19	*总胆固醇	4.58	mmol/l	42800	M	2011-04-09 11:46:40	D二聚体	43	ng/ml	0-500	M	2011-04-09 11:18:26	*葡萄糖	4.32	mmol/l	3-6.1	M	2011-04-09 11:46:40	C反应蛋白	2.39	mg/l	0-8	M	2011-04-09 18:02:17	凝血酶原时间(PT)	10.4	S	42991	M	2011-04-09 11:24:19
79	1000074599001	凝血酶原国际比值	1.06		0.72-1.29	M	2011-04-10 10:12:22	低密度脂蛋白	1.86	mmol/l	2.7-3.36	L	2011-04-10 10:01:20	部分凝血活酶时间	29.8	S	22-45	M	2011-04-10 10:12:22	*总胆固醇	3.97	mmol/l	42800	M	2011-04-10 10:01:20	D二聚体	1250	ng/ml	0-500	H	2011-04-12 14:42:48	*葡萄糖	6.33	mmol/l	3-6.1	H	2011-04-10 10:01:20	C反应蛋白	17.2	mg/l	0-8	H	2011-04-10 09:46:23	凝血酶原时间(PT)	12.2	S	42991	M	2011-04-10 10:12:22
80	1000074716002	凝血酶原国际比值	0.89		0.7-1.3	M	2014-09-15 10:29:20	低密度脂蛋白	2.64	mmol/l	健康人群:1.8-3.36;心脑血管疾病危险人群:<2.59	M	2014-09-15 08:49:54	部分凝血活酶时间	28.6	S	22-45	M	2014-09-15 10:34:18	*总胆固醇	4.8	mmol/l	3.6-5.17	M	2014-09-15 08:49:54	D二聚体	163	ng/ml	0-115	H	2014-09-15 09:52:51	*葡萄糖	5.19	mmol/l	3.89-6.11	M	2014-09-15 08:49:54	C反应蛋白	2.04	mg/l	0-8	M	2014-09-15 08:49:54	凝血酶原时间(PT)	11.8	S	43023	M	2014-09-15 10:29:20
81	1000074788001	凝血酶原国际比值	1.05		0.72-1.29	M	2011-04-12 10:26:31	低密度脂蛋白	2.49	mmol/l	2.7-3.36	L	2011-04-12 10:02:34	部分凝血活酶时间	23.2	S	22-45	M	2011-04-12 10:26:31	*总胆固醇	5.43	mmol/l	42800	M	2011-04-12 10:02:34	D二聚体	1265	ng/ml	0-500	H	2011-04-15 07:59:48	*葡萄糖	5.35	mmol/l	3-6.1	M	2011-04-12 10:02:34	C反应蛋白	5.56	mg/l	0-8	M	2011-04-12 10:36:52	凝血酶原时间(PT)	12.1	S	42991	M	2011-04-12 10:26:31
82	1000074869001	凝血酶原国际比值	0.86		0.72-1.29	M	2011-04-13 09:52:04	低密度脂蛋白	5.88	mmol/l	2.7-3.36	H	2011-04-13 09:40:56	部分凝血活酶时间	19	S	22-45	L	2011-04-13 09:52:04	*总胆固醇	7.99	mmol/l	42800	H	2011-04-13 09:40:56	D二聚体	261	ng/ml	0-500	M	2011-04-13 08:42:23	*葡萄糖	4.61	mmol/l	3-6.1	M	2011-04-13 09:40:56	C反应蛋白	2.7	mg/l	0-8	M	2011-04-13 11:52:47	凝血酶原时间(PT)	9.9	S	42991	M	2011-04-13 09:52:04
83	1000074968001	凝血酶原国际比值	0.92		0.72-1.29	M	2011-04-14 09:18:04	低密度脂蛋白	4.74	mmol/l	2.7-3.36	H	2011-04-14 09:30:03	部分凝血活酶时间	23.6	S	22-45	M	2011-04-14 10:14:05	*总胆固醇	6.89	mmol/l	42800	H	2011-04-14 09:30:03	D二聚体	278	ng/ml	0-500	M	2011-04-19 07:54:16	*葡萄糖	4.9	mmol/l	3-6.1	M	2011-04-14 09:30:03	C反应蛋白	5.1	mg/l	0-8	M	2011-04-14 10:29:20	凝血酶原时间(PT)	10.6	S	42991	M	2011-04-14 09:18:04
84	1000074970001	凝血酶原国际比值	0.98		0.72-1.29	M	2011-04-13 12:25:32	低密度脂蛋白	4.87	mmol/l	2.7-3.36	H	2011-04-13 13:16:52	部分凝血活酶时间	18.8	S	22-45	L	2011-04-13 12:25:32	*总胆固醇	6.88	mmol/l	42800	H	2011-04-13 13:16:52	D二聚体	228	ng/ml	0-500	M	2011-04-13 12:40:57	*葡萄糖	6.45	mmol/l	3-6.1	H	2011-04-13 13:16:52	C反应蛋白	16.7	mg/l	0-8	H	2011-04-13 13:16:41	凝血酶原时间(PT)	11.3	S	42991	M	2011-04-13 12:25:32
85	1000074988001	凝血酶原国际比值	0.95		0.72-1.29	M	2011-04-14 10:03:05	低密度脂蛋白	3.84	mmol/l	2.7-3.36	H	2011-04-14 09:08:24	部分凝血活酶时间	22.6	S	22-45	M	2011-04-14 10:03:05	*总胆固醇	5.77	mmol/l	42800	M	2011-04-14 09:08:24	D二聚体	130	ng/ml	0-500	M	2011-04-14 09:23:55	*葡萄糖	4.82	mmol/l	3-6.1	M	2011-04-14 09:08:24	C反应蛋白	4.5	mg/l	0-8	M	2011-04-14 10:29:15	凝血酶原时间(PT)	10.9	S	42991	M	2011-04-14 10:03:05
86	1000075034002	凝血酶原国际比值	1.08		0.7-1.3	M	2016-12-02 10:43:44	低密度脂蛋白	2.56	mmol/l	健康人群:1.8-3.36;心脑血管疾病危险人群:<2.59	M	2016-12-02 09:24:25	部分凝血活酶时间	29	S	20-40	M	2016-12-02 10:43:44	*总胆固醇	4.56	mmol/l	3.6-5.17	M	2016-12-02 09:24:25	D二聚体	700	ng/ml	0-115	H	2016-12-02 10:43:44	*葡萄糖	5.61	mmol/l	3.89-6.11	M	2016-12-02 09:24:25	C反应蛋白	73.28	mg/l	0-8	H	2016-12-02 09:24:25	凝血酶原时间(PT)	12.4	S	42992	M	2016-12-02 10:43:44
87	1000075233002	凝血酶原国际比值	0.9		0.72-1.29	M	2011-09-03 10:38:39	低密度脂蛋白	3.11	mmol/l	2.7-3.36	M	2011-09-03 12:08:02	部分凝血活酶时间	28.3	S	22-45	M	2011-09-03 10:38:39	*总胆固醇	5	mmol/l	42800	M	2011-09-03 12:08:02	D二聚体	493	ng/ml	0-256	H	2011-09-10 20:35:11	*葡萄糖	5	mmol/l	3-6.1	M	2011-09-03 12:08:02	C反应蛋白	8.3	mg/l	0-8	H	2011-09-05 17:16:28	凝血酶原时间(PT)	10.3	S	42991	M	2011-09-03 10:38:39
88	1000075309001	凝血酶原国际比值	0.96		0.72-1.29	M	2011-04-18 09:32:41	低密度脂蛋白	4.46	mmol/l	2.7-3.36	H	2011-04-18 09:21:09	部分凝血活酶时间	25.3	S	22-45	M	2011-04-18 09:32:41	*总胆固醇	6.73	mmol/l	42800	H	2011-04-18 09:21:09	D二聚体	310	ng/ml	0-500	M	2011-04-24 13:09:53	*葡萄糖	4.51	mmol/l	3-6.1	M	2011-04-18 09:21:09	C反应蛋白	3.4	mg/l	0-8	M	2011-04-18 11:47:33	凝血酶原时间(PT)	11	S	42991	M	2011-04-18 09:32:41
89	1000075451001	凝血酶原国际比值	0.99		0.72-1.29	M	2011-04-19 10:23:27	低密度脂蛋白	2.81	mmol/l	2.7-3.36	M	2011-04-19 09:15:04	部分凝血活酶时间	33.9	S	22-45	M	2011-04-19 10:23:27	*总胆固醇	4.27	mmol/l	42800	M	2011-04-19 09:15:04	D二聚体	97	ng/ml	0-500	M	2011-04-19 11:19:22	*葡萄糖	5.56	mmol/l	3-6.1	M	2011-04-19 09:15:04	C反应蛋白	28.4	mg/l	0-8	H	2011-04-19 11:25:43	凝血酶原时间(PT)	11.4	S	42991	M	2011-04-19 10:23:27
90	1000075535001	凝血酶原国际比值	1.03		0.72-1.29	M	2011-04-25 12:26:37	低密度脂蛋白	4.2	mmol/l	2.7-3.36	H	2011-04-20 09:43:07	部分凝血活酶时间	34.2	S	22-45	M	2011-04-25 12:26:37	*总胆固醇	6.95	mmol/l	42800	H	2011-04-20 09:43:07	D二聚体	1797	ng/ml	0-500	H	2011-04-22 07:09:03	*葡萄糖	5.06	mmol/l	3-6.1	M	2011-04-20 09:43:07	C反应蛋白	4.7	mg/l	0-8	M	2011-04-21 10:07:56	凝血酶原时间(PT)	11.9	S	42991	M	2011-04-25 12:26:37
91	1000075598001	凝血酶原国际比值	1.03		0.72-1.29	M	2011-04-20 10:13:24	低密度脂蛋白	3.54	mmol/l	2.7-3.36	H	2011-04-20 09:55:58	部分凝血活酶时间	30.5	S	22-45	M	2011-04-20 10:13:24	*总胆固醇	5.51	mmol/l	42800	M	2011-04-20 09:55:58	D二聚体	867	ng/ml	0-500	H	2011-04-20 09:53:54	*葡萄糖	6.13	mmol/l	3-6.1	H	2011-04-20 09:55:58	C反应蛋白	8.2	mg/l	0-8	H	2011-04-20 10:13:53	凝血酶原时间(PT)	11.8	S	42991	M	2011-04-20 10:13:24
92	1000075623001	凝血酶原国际比值	0.95		0.72-1.29	M	2011-04-21 10:17:47	低密度脂蛋白	1.82	mmol/l	2.7-3.36	L	2011-04-21 09:26:14	部分凝血活酶时间	30	S	22-45	M	2011-04-21 10:17:47	*总胆固醇	3.78	mmol/l	42800	M	2011-04-21 09:26:14	D二聚体	451	ng/ml	0-500	M	2011-04-23 11:29:29	*葡萄糖	6.16	mmol/l	3-6.1	H	2011-04-21 09:26:14	C反应蛋白	108.7	mg/l	0-8	H	2011-04-23 10:01:07	凝血酶原时间(PT)	10.9	S	42991	M	2011-04-21 10:17:47
93	1000075843001	凝血酶原国际比值	1.07		0.72-1.29	M	2011-04-30 07:33:21	低密度脂蛋白	2.58	mmol/l	2.7-3.36	L	2011-04-23 09:57:32	部分凝血活酶时间	28.2	S	22-45	M	2011-04-30 07:33:21	*总胆固醇	4.09	mmol/l	42800	M	2011-04-23 09:57:32	D二聚体	2637	ng/ml	0-500	H	2011-04-30 07:49:01	*葡萄糖	4.06	mmol/l	3-6.1	M	2011-04-23 09:57:32	C反应蛋白	3.6	mg/l	0-8	M	2011-04-26 14:47:09	凝血酶原时间(PT)	12.3	S	42991	M	2011-04-30 07:33:21
94	1000075868001	凝血酶原国际比值	0.97		0.72-1.29	M	2011-04-23 10:57:39	低密度脂蛋白	1.89	mmol/l	2.7-3.36	L	2011-04-23 09:58:23	部分凝血活酶时间	24.6	S	22-45	M	2011-04-23 10:57:39	*总胆固醇	3.44	mmol/l	42800	M	2011-04-23 09:58:23	D二聚体	220	ng/ml	0-500	M	2011-04-23 11:28:03	*葡萄糖	4.62	mmol/l	3-6.1	M	2011-04-23 09:58:23	C反应蛋白	3.1	mg/l	0-8	M	2011-04-23 12:24:17	凝血酶原时间(PT)	11.1	S	42991	M	2011-04-23 10:57:39
95	1000076297001	凝血酶原国际比值	0.97		0.72-1.29	M	2011-04-27 09:42:46	低密度脂蛋白	1.99	mmol/l	2.7-3.36	L	2011-04-27 19:44:11	部分凝血活酶时间	24.2	S	22-45	M	2011-04-27 09:42:46	*总胆固醇	4.2	mmol/l	42800	M	2011-04-27 19:44:11	D二聚体	520	ng/ml	0-500	H	2011-04-27 10:24:07	*葡萄糖	7.5	mmol/l	3-6.1	H	2011-04-27 19:44:11	C反应蛋白	16.4	mg/l	0-8	H	2011-04-27 10:58:47	凝血酶原时间(PT)	11.1	S	42991	M	2011-04-27 09:42:46
96	1000076306001	凝血酶原国际比值	1.06		0.72-1.29	M	2011-04-27 10:56:15	低密度脂蛋白	3.06	mmol/l	2.7-3.36	M	2011-04-27 10:22:56	部分凝血活酶时间	26.5	S	22-45	M	2011-04-27 10:56:15	*总胆固醇	4.14	mmol/l	42800	M	2011-04-27 10:22:56	D二聚体	2376	ng/ml	0-500	H	2011-04-27 10:47:27	*葡萄糖	7.91	mmol/l	3-6.1	H	2011-04-27 10:22:56	C反应蛋白	7.9	mg/l	0-8	M	2011-04-27 15:33:50	凝血酶原时间(PT)	12.2	S	42991	M	2011-04-27 10:56:15
97	1000076651001	凝血酶原国际比值	1.05		0.72-1.29	M	2011-04-30 09:52:36	低密度脂蛋白	2.73	mmol/l	2.7-3.36	M	2011-04-30 09:46:53	部分凝血活酶时间	33.5	S	22-45	M	2011-04-30 09:52:36	*总胆固醇	4.13	mmol/l	42800	M	2011-04-30 09:46:53	D二聚体	2114	ng/ml	0-500	H	2011-04-30 09:10:02	*葡萄糖	6.43	mmol/l	3-6.1	H	2011-04-30 09:46:53	C反应蛋白	9.9	mg/l	0-8	H	2011-04-30 10:02:57	凝血酶原时间(PT)	12.1	S	42991	M	2011-04-30 09:52:36
98	1000076836001	凝血酶原国际比值	0.99		0.72-1.29	M	2011-05-04 10:06:09	低密度脂蛋白	2.29	mmol/l	2.7-3.36	L	2011-05-04 09:30:58	部分凝血活酶时间	28	S	22-45	M	2011-05-04 10:06:09	*总胆固醇	3.98	mmol/l	42800	M	2011-05-04 09:30:58	D二聚体	1220	ng/ml	0-500	H	2011-05-07 11:26:30	*葡萄糖	6.87	mmol/l	3-6.1	H	2011-05-04 09:30:58	C反应蛋白	4.6	mg/l	0-8	M	2011-05-04 10:47:34	凝血酶原时间(PT)	11.4	S	42991	M	2011-05-04 10:06:09
99	1000076958001	凝血酶原国际比值	1.03		0.72-1.29	M	2011-05-04 11:17:40	低密度脂蛋白	4.3	mmol/l	2.7-3.36	H	2011-05-04 11:09:49	部分凝血活酶时间	27.8	S	22-45	M	2011-05-04 11:17:40	*总胆固醇	5.74	mmol/l	42800	M	2011-05-04 11:09:49	D二聚体	74	ng/ml	0-500	M	2011-05-04 11:41:55	*葡萄糖	4.7	mmol/l	3-6.1	M	2011-05-04 11:09:49	C反应蛋白	9.2	mg/l	0-8	H	2011-05-04 17:09:08	凝血酶原时间(PT)	11.9	S	42991	M	2011-05-04 11:17:40
100	1000077368001	凝血酶原国际比值	1.03		0.72-1.29	M	2011-05-10 08:45:54	低密度脂蛋白	2.56	mmol/l	2.7-3.36	L	2011-05-10 09:22:09	部分凝血活酶时间	26	S	22-45	M	2011-05-10 08:45:54	*总胆固醇	4.27	mmol/l	42800	M	2011-05-10 09:22:09	D二聚体	109	ng/ml	0-500	M	2011-05-10 12:29:28	*葡萄糖	4.42	mmol/l	3-6.1	M	2011-05-10 09:22:09	C反应蛋白	8.6	mg/l	0-8	H	2011-05-10 10:13:02	凝血酶原时间(PT)	11.8	S	42991	M	2011-05-10 08:45:54
101	1000077534002	凝血酶原国际比值	1.09		0.7-1.3	M	2016-12-02 12:49:40	低密度脂蛋白	2.93	mmol/l	健康人群:1.8-3.36;心脑血管疾病危险人群:<2.59	M	2016-12-02 13:00:26	部分凝血活酶时间	33.3	S	20-40	M	2016-12-02 12:49:40	*总胆固醇	5.05	mmol/l	3.6-5.17	M	2016-12-02 13:00:26	D二聚体	130	ng/ml	0-115	H	2016-12-02 12:49:40	*葡萄糖	6.79	mmol/l	3.89-6.11	H	2016-12-02 13:00:26	C反应蛋白	73.12	mg/l	0-8	H	2016-12-02 13:00:26	凝血酶原时间(PT)	12.5	S	42992	M	2016-12-02 12:49:40
102	1000077536002	凝血酶原国际比值	0.83		0.7-1.3	M	2015-06-06 10:35:32	低密度脂蛋白	2.77	mmol/l	健康人群:1.8-3.36;心脑血管疾病危险人群:<2.59	M	2015-06-06 09:21:51	部分凝血活酶时间	23.3	S	22-45	M	2015-06-06 10:35:32	*总胆固醇	5.35	mmol/l	3.6-5.17	H	2015-06-06 09:21:51	D二聚体	40	ng/ml	0-115	M	2015-06-06 10:35:32	*葡萄糖	7.02	mmol/l	3.89-6.11	H	2015-06-06 09:21:51	C反应蛋白	2.09	mg/l	0-8	M	2015-06-06 09:21:51	凝血酶原时间(PT)	9.5	S	42992	M	2015-06-06 10:35:32
103	1000077536003	凝血酶原国际比值	0.8		0.7-1.3	M	2015-09-07 10:39:56	低密度脂蛋白	2.1	mmol/l	健康人群:1.8-3.36;心脑血管疾病危险人群:<2.59	M	2015-09-07 11:07:50	部分凝血活酶时间	26.1	S	22-45	M	2015-09-07 10:39:56	*总胆固醇	4.62	mmol/l	3.6-5.17	M	2015-09-07 11:07:50	D二聚体	40	ng/ml	0-115	M	2015-09-07 10:39:56	*葡萄糖	6.24	mmol/l	3.89-6.11	H	2015-09-07 11:07:50	C反应蛋白	2.81	mg/l	0-8	M	2015-09-07 11:07:50	凝血酶原时间(PT)	9.2	S	42992	M	2015-09-07 10:39:56
104	1000077734001	凝血酶原国际比值	1.07		0.72-1.29	M	2011-05-13 09:33:41	低密度脂蛋白	3.1	mmol/l	2.7-3.36	M	2011-05-13 09:31:34	部分凝血活酶时间	29.7	S	22-45	M	2011-05-13 09:33:41	*总胆固醇	4.41	mmol/l	42800	M	2011-05-13 09:31:34	D二聚体	186	ng/ml	0-500	M	2011-05-13 10:46:00	*葡萄糖	5.13	mmol/l	3-6.1	M	2011-05-13 09:31:34	C反应蛋白	5.1	mg/l	0-8	M	2011-05-13 09:43:31	凝血酶原时间(PT)	12.3	S	42991	M	2011-05-13 09:33:41
105	1000077760001	凝血酶原国际比值	0.99		0.72-1.29	M	2011-05-13 09:53:11	低密度脂蛋白	4.72	mmol/l	2.7-3.36	H	2011-05-13 09:41:23	部分凝血活酶时间	25.2	S	22-45	M	2011-05-13 09:53:11	*总胆固醇	6.04	mmol/l	42800	H	2011-05-13 09:41:23	D二聚体	305	ng/ml	0-500	M	2011-05-13 09:35:55	*葡萄糖	6.09	mmol/l	3-6.1	M	2011-05-13 09:41:23	C反应蛋白	5.6	mg/l	0-8	M	2011-05-13 10:38:03	凝血酶原时间(PT)	11.4	S	42991	M	2011-05-13 09:53:11
106	1000077785001	凝血酶原国际比值	1.08		0.72-1.29	M	2011-05-13 09:26:59	低密度脂蛋白	2.98	mmol/l	2.7-3.36	M	2011-05-13 09:25:24	部分凝血活酶时间	24.6	S	22-45	M	2011-05-13 09:26:59	*总胆固醇	4.14	mmol/l	42800	M	2011-05-13 09:25:24	D二聚体	1177	ng/ml	0-500	H	2011-05-19 20:12:57	*葡萄糖	5.26	mmol/l	3-6.1	M	2011-05-13 09:25:24	C反应蛋白	151.8	mg/l	0-8	H	2011-05-25 12:56:54	凝血酶原时间(PT)	12.4	S	42991	M	2011-05-13 09:26:59
107	1000077870001	凝血酶原国际比值	1.02		0.72-1.29	M	2011-05-14 09:06:46	低密度脂蛋白	3.05	mmol/l	2.7-3.36	M	2011-05-14 10:18:16	部分凝血活酶时间	28	S	22-45	M	2011-05-14 09:06:46	*总胆固醇	4.33	mmol/l	42800	M	2011-05-14 10:18:16	D二聚体	1232	ng/ml	0-500	H	2011-05-14 09:24:39	*葡萄糖	6.1	mmol/l	3-6.1	M	2011-05-14 10:18:16	C反应蛋白	7.8	mg/l	0-8	M	2011-05-14 10:23:03	凝血酶原时间(PT)	11.7	S	42991	M	2011-05-14 09:06:46
108	1000077952001	凝血酶原国际比值	0.97		0.72-1.29	M	2011-05-16 09:00:35	低密度脂蛋白	2.86	mmol/l	2.7-3.36	M	2011-05-16 09:07:01	部分凝血活酶时间	25.5	S	22-45	M	2011-05-16 09:00:35	*总胆固醇	4.46	mmol/l	42800	M	2011-05-16 09:07:01	D二聚体	83	ng/ml	0-500	M	2011-05-20 09:50:37	*葡萄糖	5.64	mmol/l	3-6.1	M	2011-05-16 09:07:01	C反应蛋白	1.6	mg/l	0-8	M	2011-05-16 09:42:26	凝血酶原时间(PT)	11.2	S	42991	M	2011-05-16 09:00:35
109	1000078239001	凝血酶原国际比值	0.99		0.72-1.29	M	2011-05-19 08:57:18	低密度脂蛋白	2.7	mmol/l	2.7-3.36	M	2011-05-19 08:53:36	部分凝血活酶时间	23.2	S	22-45	M	2011-05-19 08:57:18	*总胆固醇	4.23	mmol/l	42800	M	2011-05-19 08:53:36	D二聚体	1632	ng/ml	0-500	H	2011-05-24 08:04:51	*葡萄糖	3.69	mmol/l	3-6.1	M	2011-05-19 08:53:36	C反应蛋白	1.4	mg/l	0-8	M	2011-05-19 09:20:19	凝血酶原时间(PT)	11.4	S	42991	M	2011-05-19 08:57:18
110	1000078389001	凝血酶原国际比值	1.08		0.72-1.29	M	2011-05-20 07:45:59	低密度脂蛋白	2.66	mmol/l	2.7-3.36	L	2011-05-20 07:43:20	部分凝血活酶时间	24.9	S	22-45	M	2011-05-20 07:45:59	*总胆固醇	4.6	mmol/l	42800	M	2011-05-20 07:43:20	D二聚体	436	ng/ml	0-500	M	2011-06-08 11:09:04	*葡萄糖	5.4	mmol/l	3-6.1	M	2011-05-20 07:43:20	C反应蛋白	2.3	mg/l	0-8	M	2011-06-13 09:19:14	凝血酶原时间(PT)	12.4	S	42991	M	2011-05-20 07:45:59
111	1000078403001	凝血酶原国际比值	1.08		0.72-1.29	M	2011-05-20 09:12:45	低密度脂蛋白	2.41	mmol/l	2.7-3.36	L	2011-05-20 09:22:48	部分凝血活酶时间	29.2	S	22-45	M	2011-05-20 09:12:45	*总胆固醇	4.43	mmol/l	42800	M	2011-05-20 09:22:48	D二聚体	105	ng/ml	0-500	M	2011-05-20 10:16:24	*葡萄糖	3.98	mmol/l	3-6.1	M	2011-05-20 09:22:48	C反应蛋白	1.6	mg/l	0-8	M	2011-05-20 09:37:40	凝血酶原时间(PT)	12.4	S	42991	M	2011-05-20 09:12:45
112	1000078412001	凝血酶原国际比值	1.03		0.72-1.29	M	2011-05-20 09:35:27	低密度脂蛋白	4.01	mmol/l	2.7-3.36	H	2011-05-20 09:28:11	部分凝血活酶时间	29.8	S	22-45	M	2011-05-20 09:35:27	*总胆固醇	5.61	mmol/l	42800	M	2011-05-20 09:28:11	D二聚体	1190	ng/ml	0-500	H	2011-05-20 09:08:32	*葡萄糖	5.94	mmol/l	3-6.1	M	2011-05-20 09:28:11	C反应蛋白	23.2	mg/l	0-8	H	2011-05-20 09:35:38	凝血酶原时间(PT)	11.9	S	42991	M	2011-05-20 09:35:27
113	1000078497001	凝血酶原国际比值	1.08		0.72-1.29	M	2011-05-21 09:08:53	低密度脂蛋白	2.17	mmol/l	2.7-3.36	L	2011-05-21 09:38:19	部分凝血活酶时间	32	S	22-45	M	2011-05-21 09:08:53	*总胆固醇	3.35	mmol/l	42800	M	2011-05-21 09:38:19	D二聚体	531	ng/ml	0-500	H	2011-05-21 11:34:09	*葡萄糖	4.66	mmol/l	3-6.1	M	2011-05-21 09:38:19	C反应蛋白	22.3	mg/l	0-8	H	2011-05-21 09:40:56	凝血酶原时间(PT)	12.4	S	42991	M	2011-05-21 09:08:53
114	1000078764001	凝血酶原国际比值	1.03		0.72-1.29	M	2011-05-24 09:09:36	低密度脂蛋白	4.33	mmol/l	2.7-3.36	H	2011-05-24 09:38:25	部分凝血活酶时间	31.4	S	22-45	M	2011-05-24 09:09:36	*总胆固醇	5.65	mmol/l	42800	M	2011-05-24 09:38:25	D二聚体	1009	ng/ml	0-500	H	2011-05-28 09:28:02	*葡萄糖	4.53	mmol/l	3-6.1	M	2011-05-24 09:38:25	C反应蛋白	4.2	mg/l	0-8	M	2011-05-25 10:47:29	凝血酶原时间(PT)	11.9	S	42991	M	2011-05-24 09:09:36
115	1000078865001	凝血酶原国际比值	0.91		0.72-1.29	M	2011-05-25 08:44:23	低密度脂蛋白	2.86	mmol/l	2.7-3.36	M	2011-05-25 10:41:52	部分凝血活酶时间	22	S	22-45	M	2011-05-25 08:44:23	*总胆固醇	4.68	mmol/l	42800	M	2011-05-25 10:41:52	D二聚体	2820	ng/ml	0-500	H	2011-06-03 09:22:02	*葡萄糖	14	mmol/l	3-6.1	H	2011-05-25 10:41:52	C反应蛋白	3.2	mg/l	0-8	M	2011-05-25 10:47:34	凝血酶原时间(PT)	10.5	S	42991	M	2011-05-25 08:44:23
116	1000078893001	凝血酶原国际比值	1.01		0.72-1.29	M	2011-05-25 08:53:25	低密度脂蛋白	3.33	mmol/l	2.7-3.36	M	2011-05-25 10:43:21	部分凝血活酶时间	29.6	S	22-45	M	2011-05-25 08:53:25	*总胆固醇	4.97	mmol/l	42800	M	2011-05-25 10:43:21	D二聚体	244	ng/ml	0-500	M	2011-06-10 11:26:09	*葡萄糖	4.12	mmol/l	3-6.1	M	2011-05-25 10:43:21	C反应蛋白	6.7	mg/l	0-8	M	2011-05-25 14:23:19	凝血酶原时间(PT)	11.6	S	42991	M	2011-05-25 08:53:25
117	1000078998001	凝血酶原国际比值	0.92		0.72-1.29	M	2011-05-26 09:58:02	低密度脂蛋白	4.29	mmol/l	2.7-3.36	H	2011-05-26 09:44:21	部分凝血活酶时间	24.9	S	22-45	M	2011-05-26 09:58:02	*总胆固醇	5.84	mmol/l	42800	M	2011-05-26 09:44:21	D二聚体	0	ng/ml	0-500	M	2011-05-26 08:46:45	*葡萄糖	4.1	mmol/l	3-6.1	M	2011-05-26 09:44:21	C反应蛋白	1.9	mg/l	0-8	M	2011-05-26 10:20:17	凝血酶原时间(PT)	10.6	S	42991	M	2011-05-26 09:58:02
118	1000079420001	凝血酶原国际比值	1.1		0.72-1.29	M	2011-05-30 09:48:31	低密度脂蛋白	3.89	mmol/l	2.7-3.36	H	2011-05-30 10:33:55	部分凝血活酶时间	29.7	S	22-45	M	2011-05-30 09:48:31	*总胆固醇	5.1	mmol/l	42800	M	2011-05-30 10:33:55	D二聚体	5958	ng/ml	0-500	H	2011-05-30 10:31:58	*葡萄糖	5.91	mmol/l	3-6.1	M	2011-05-30 10:33:55	C反应蛋白	12.8	mg/l	0-8	H	2011-05-30 10:33:55	凝血酶原时间(PT)	12.6	S	42991	M	2011-05-30 09:48:31
119	1000079566001	凝血酶原国际比值	0.96		0.72-1.29	M	2011-06-01 08:39:06	低密度脂蛋白	3.56	mmol/l	2.7-3.36	H	2011-06-01 09:51:30	部分凝血活酶时间	24.4	S	22-45	M	2011-06-01 08:39:06	*总胆固醇	5.65	mmol/l	42800	M	2011-06-01 09:51:30	D二聚体	1000	ng/ml	0-500	H	2011-06-04 08:14:44	*葡萄糖	4.78	mmol/l	3-6.1	M	2011-06-01 09:51:30	C反应蛋白	2.8	mg/l	0-8	M	2011-06-02 10:51:15	凝血酶原时间(PT)	11	S	42991	M	2011-06-01 08:39:06
120	1000079760001	凝血酶原国际比值	0.99		0.72-1.29	M	2011-06-03 09:00:17	低密度脂蛋白	2.5	mmol/l	2.7-3.36	L	2011-06-03 09:45:51	部分凝血活酶时间	27.3	S	22-45	M	2011-06-03 09:00:17	*总胆固醇	3.77	mmol/l	42800	M	2011-06-03 09:45:51	D二聚体	541	ng/ml	0-500	H	2011-06-04 09:44:12	*葡萄糖	5.25	mmol/l	3-6.1	M	2011-06-03 09:45:51	C反应蛋白	23.8	mg/l	0-8	H	2011-06-03 09:43:58	凝血酶原时间(PT)	11.4	S	42991	M	2011-06-03 09:00:17
121	1000080117001	凝血酶原国际比值	1.02		0.72-1.29	M	2011-06-08 10:35:50	低密度脂蛋白	3.73	mmol/l	2.7-3.36	H	2011-06-08 11:59:49	部分凝血活酶时间	29	S	22-45	M	2011-06-08 10:35:50	*总胆固醇	5.39	mmol/l	42800	M	2011-06-08 11:59:49	D二聚体	123	ng/ml	0-500	M	2011-06-08 10:40:28	*葡萄糖	4.47	mmol/l	3-6.1	M	2011-06-08 11:59:49	C反应蛋白	8.6	mg/l	0-8	H	2011-06-08 11:59:38	凝血酶原时间(PT)	11.7	S	42991	M	2011-06-08 10:35:50
122	1000080154001	凝血酶原国际比值	0.99		0.72-1.29	M	2011-06-08 10:00:34	低密度脂蛋白	3.85	mmol/l	2.7-3.36	H	2011-06-08 12:00:19	部分凝血活酶时间	24.1	S	22-45	M	2011-06-08 10:00:34	*总胆固醇	5.77	mmol/l	42800	M	2011-06-08 12:00:19	D二聚体	83	ng/ml	0-500	M	2011-06-08 09:13:03	*葡萄糖	3.98	mmol/l	3-6.1	M	2011-06-08 12:00:19	C反应蛋白	3.6	mg/l	0-8	M	2011-06-08 12:00:20	凝血酶原时间(PT)	11.4	S	42991	M	2011-06-08 10:00:34
123	1000080257001	凝血酶原国际比值	1.1		0.72-1.29	M	2011-06-09 09:25:12	低密度脂蛋白	2.83	mmol/l	2.7-3.36	M	2011-06-09 09:25:49	部分凝血活酶时间	29.3	S	22-45	M	2011-06-09 09:25:12	*总胆固醇	3.98	mmol/l	42800	M	2011-06-09 09:25:49	D二聚体	448	ng/ml	0-500	M	2011-07-01 07:08:21	*葡萄糖	4.71	mmol/l	3-6.1	M	2011-06-09 09:25:49	C反应蛋白	21.7	mg/l	0-8	H	2011-06-12 10:01:33	凝血酶原时间(PT)	12.6	S	42991	M	2011-06-09 09:25:12
124	1000080406001	凝血酶原国际比值	0.96		0.72-1.29	M	2011-06-11 09:51:04	低密度脂蛋白	3.72	mmol/l	2.7-3.36	H	2011-06-11 09:39:08	部分凝血活酶时间	22.8	S	22-45	M	2011-06-11 09:51:04	*总胆固醇	5.7	mmol/l	42800	M	2011-06-11 09:39:08	D二聚体	743	ng/ml	0-500	H	2011-06-16 08:54:44	*葡萄糖	6.48	mmol/l	3-6.1	H	2011-06-11 09:39:08	C反应蛋白	4	mg/l	0-8	M	2011-06-11 09:42:04	凝血酶原时间(PT)	11	S	42991	M	2011-06-11 09:51:04
125	1000080460001	凝血酶原国际比值	1.05		0.72-1.29	M	2011-06-11 09:46:32	低密度脂蛋白	3.98	mmol/l	2.7-3.36	H	2011-06-11 09:01:01	部分凝血活酶时间	29	S	22-45	M	2011-06-11 09:46:32	*总胆固醇	5.2	mmol/l	42800	M	2011-06-11 09:01:01	D二聚体	198	ng/ml	0-500	M	2011-06-11 10:19:40	*葡萄糖	4.42	mmol/l	3-6.1	M	2011-06-11 09:01:01	C反应蛋白	77.4	mg/l	0-8	H	2011-06-11 09:10:07	凝血酶原时间(PT)	12.1	S	42991	M	2011-06-11 09:46:32
126	1000080646001	凝血酶原国际比值	1.03		0.72-1.29	M	2011-06-13 12:47:06	低密度脂蛋白	2.55	mmol/l	2.7-3.36	L	2011-06-16 09:05:35	部分凝血活酶时间	27.8	S	22-45	M	2011-06-13 12:47:06	*总胆固醇	4.16	mmol/l	42800	M	2011-06-16 09:05:35	D二聚体	81	ng/ml	0-500	M	2011-06-13 12:48:16	*葡萄糖	4.42	mmol/l	3-6.1	M	2011-06-16 09:05:35	C反应蛋白	10.3	mg/l	0-8	H	2011-06-21 11:12:20	凝血酶原时间(PT)	11.8	S	42991	M	2011-06-13 12:47:06
127	1000080772001	凝血酶原国际比值	1.02		0.72-1.29	M	2011-06-15 09:28:26	低密度脂蛋白	2.78	mmol/l	2.7-3.36	M	2011-06-15 09:01:13	部分凝血活酶时间	26.5	S	22-45	M	2011-06-15 09:28:26	*总胆固醇	4.32	mmol/l	42800	M	2011-06-15 09:01:13	D二聚体	725	ng/ml	0-500	H	2011-06-18 11:31:53	*葡萄糖	4.47	mmol/l	3-6.1	M	2011-06-15 09:01:13	C反应蛋白	1.8	mg/l	0-8	M	2011-06-15 09:44:03	凝血酶原时间(PT)	11.7	S	42991	M	2011-06-15 09:28:26
128	1000080785001	凝血酶原国际比值	0.98		0.72-1.29	M	2011-06-15 08:53:46	低密度脂蛋白	5.9	mmol/l	2.7-3.36	H	2011-06-15 09:42:11	部分凝血活酶时间	29.8	S	22-45	M	2011-06-15 08:53:46	*总胆固醇	7.25	mmol/l	42800	H	2011-06-15 09:42:11	D二聚体	0	ng/ml	0-500	M	2011-06-15 08:57:56	*葡萄糖	4.3	mmol/l	3-6.1	M	2011-06-15 09:42:11	C反应蛋白	2	mg/l	0-8	M	2011-06-15 09:11:22	凝血酶原时间(PT)	11.3	S	42991	M	2011-06-15 08:53:46
129	1000080871002	凝血酶原国际比值	0.92		0.7-1.3	M	2016-03-15 15:48:57	低密度脂蛋白	2.61	mmol/l	健康人群:1.8-3.36;心脑血管疾病危险人群:<2.59	M	2016-03-15 12:41:39	部分凝血活酶时间	29.2	S	22-45	M	2016-03-15 15:48:57	*总胆固醇	5	mmol/l	3.6-5.17	M	2016-03-15 12:41:39	D二聚体	30	ng/ml	0-115	M	2016-03-15 15:48:57	*葡萄糖	5.1	mmol/l	3.89-6.11	M	2016-03-15 12:41:39	C反应蛋白	0.3	mg/l	0-8	M	2016-03-15 12:41:39	凝血酶原时间(PT)	10.6	S	42992	M	2016-03-15 15:48:57
130	1000080937001	凝血酶原国际比值	1		0.72-1.29	M	2011-06-16 10:45:21	低密度脂蛋白	2.06	mmol/l	2.7-3.36	L	2011-06-16 10:42:54	部分凝血活酶时间	26.4	S	22-45	M	2011-06-16 10:45:21	*总胆固醇	4.19	mmol/l	42800	M	2011-06-16 10:42:54	D二聚体	311	ng/ml	0-500	M	2011-06-16 10:39:21	*葡萄糖	4.65	mmol/l	3-6.1	M	2011-06-16 10:42:54	C反应蛋白	3.6	mg/l	0-8	M	2011-06-16 10:44:07	凝血酶原时间(PT)	11.5	S	42991	M	2011-06-16 10:45:21
131	1000081240001	凝血酶原国际比值	0.97		0.72-1.29	M	2011-06-20 09:26:22	低密度脂蛋白	3.58	mmol/l	2.7-3.36	H	2011-06-20 09:24:26	部分凝血活酶时间	22.6	S	22-45	M	2011-06-20 09:26:22	*总胆固醇	6.08	mmol/l	42800	H	2011-06-20 09:24:26	D二聚体	1321	ng/ml	0-500	H	2011-06-22 09:20:51	*葡萄糖	4.52	mmol/l	3-6.1	M	2011-06-20 09:24:26	C反应蛋白	3.4	mg/l	0-8	M	2011-06-20 09:33:22	凝血酶原时间(PT)	11.1	S	42991	M	2011-06-20 09:26:22
132	1000081303001	凝血酶原国际比值	1.03		0.72-1.29	M	2011-06-21 10:03:51	低密度脂蛋白	3.65	mmol/l	2.7-3.36	H	2011-06-21 11:12:26	部分凝血活酶时间	31.7	S	22-45	M	2011-06-21 10:03:51	*总胆固醇	5.77	mmol/l	42800	M	2011-06-21 11:12:26	D二聚体	637	ng/ml	0-500	H	2011-06-23 07:22:29	*葡萄糖	3.62	mmol/l	3-6.1	M	2011-06-21 11:12:26	C反应蛋白	6.2	mg/l	0-8	M	2011-06-21 10:52:35	凝血酶原时间(PT)	11.8	S	42991	M	2011-06-21 10:03:51
133	1000081309001	凝血酶原国际比值	0.95		0.72-1.29	M	2011-06-21 10:01:38	低密度脂蛋白	3.21	mmol/l	2.7-3.36	M	2011-06-21 11:11:53	部分凝血活酶时间	21.3	S	22-45	L	2011-06-21 10:01:38	*总胆固醇	5.5	mmol/l	42800	M	2011-06-21 11:11:53	D二聚体	1018	ng/ml	0-500	H	2011-06-24 06:54:22	*葡萄糖	5.31	mmol/l	3-6.1	M	2011-06-21 11:11:53	C反应蛋白	6.4	mg/l	0-8	M	2011-06-21 10:54:01	凝血酶原时间(PT)	10.9	S	42991	M	2011-06-21 10:01:38
134	1000081342001	凝血酶原国际比值	0.97		0.72-1.29	M	2011-06-21 09:37:11	低密度脂蛋白	2.91	mmol/l	2.7-3.36	M	2011-06-21 11:18:45	部分凝血活酶时间	24.4	S	22-45	M	2011-06-21 09:37:11	*总胆固醇	5.68	mmol/l	42800	M	2011-06-21 11:18:45	D二聚体	439	ng/ml	0-500	M	2011-06-29 10:13:51	*葡萄糖	5.12	mmol/l	3-6.1	M	2011-06-21 11:18:45	C反应蛋白	6.8	mg/l	0-8	M	2011-06-21 10:53:56	凝血酶原时间(PT)	11.2	S	42991	M	2011-06-21 09:37:11
135	1000081885002	凝血酶原国际比值	0.9		0.7-1.3	M	2015-02-26 09:39:40	低密度脂蛋白	2.06	mmol/l	健康人群:1.8-3.36;心脑血管疾病危险人群:<2.59	M	2015-02-26 09:40:28	部分凝血活酶时间	34.4	S	22-45	M	2015-02-26 09:49:12	*总胆固醇	4.35	mmol/l	3.6-5.17	M	2015-02-26 09:40:28	D二聚体	62	ng/ml	0-115	M	2015-02-26 09:22:09	*葡萄糖	4.89	mmol/l	3.89-6.11	M	2015-02-26 09:40:28	C反应蛋白	2.3	mg/l	0-8	M	2015-02-26 09:43:47	凝血酶原时间(PT)	11.9	S	43023	M	2015-02-26 09:39:40
136	1000082300001	凝血酶原国际比值	1.06		0.72-1.29	M	2011-07-01 09:49:58	低密度脂蛋白	2.28	mmol/l	2.7-3.36	L	2011-07-01 09:38:44	部分凝血活酶时间	35.2	S	22-45	M	2011-07-01 09:49:58	*总胆固醇	5.12	mmol/l	42800	M	2011-07-01 09:23:01	D二聚体	9100	ng/ml	0-256	H	2011-07-08 23:33:32	*葡萄糖	4.87	mmol/l	3-6.1	M	2011-07-01 09:23:01	C反应蛋白	8.3	mg/l	0-8	H	2011-07-01 09:12:25	凝血酶原时间(PT)	12.2	S	42991	M	2011-07-01 09:49:58
137	1000082521001	凝血酶原国际比值	1.2		0.72-1.29	M	2011-07-05 09:04:05	低密度脂蛋白	1.49	mmol/l	2.7-3.36	L	2011-07-05 09:44:08	部分凝血活酶时间	30.1	S	22-45	M	2011-07-05 09:04:05	*总胆固醇	4.45	mmol/l	42800	M	2011-07-05 09:44:08	D二聚体	207	ng/ml	0-256	M	2011-07-08 07:33:13	*葡萄糖	5.42	mmol/l	3-6.1	M	2011-07-05 09:44:07	C反应蛋白	5.2	mg/l	0-8	M	2011-07-06 11:14:39	凝血酶原时间(PT)	13.8	S	42991	H	2011-07-05 09:04:05
138	1000082616001	凝血酶原国际比值	1.03		0.72-1.29	M	2011-07-06 09:00:50	低密度脂蛋白	0.91	mmol/l	2.7-3.36	L	2011-07-06 08:54:33	部分凝血活酶时间	29.6	S	22-45	M	2011-07-06 09:00:50	*总胆固醇	3.02	mmol/l	42800	M	2011-07-06 08:54:33	D二聚体	6663	ng/ml	0-256	H	2011-07-14 20:56:29	*葡萄糖	4.82	mmol/l	3-6.1	M	2011-07-06 08:54:33	C反应蛋白	10.2	mg/l	0-8	H	2011-07-06 08:54:33	凝血酶原时间(PT)	11.9	S	42991	M	2011-07-06 09:00:50
139	1000082671001	凝血酶原国际比值	0.89		0.72-1.29	M	2011-07-06 09:34:11	低密度脂蛋白	3.01	mmol/l	2.7-3.36	M	2011-07-06 08:56:40	部分凝血活酶时间	27.4	S	22-45	M	2011-07-06 09:34:11	*总胆固醇	6.61	mmol/l	42800	H	2011-07-06 08:56:40	D二聚体	147	ng/ml	0-256	M	2011-07-23 12:47:19	*葡萄糖	4.45	mmol/l	3-6.1	M	2011-07-06 08:56:40	C反应蛋白	8.9	mg/l	0-8	H	2011-07-06 09:17:45	凝血酶原时间(PT)	10.2	S	42991	M	2011-07-06 09:34:11
140	1000082734002	凝血酶原国际比值	0.87		0.7-1.3	M	2015-07-18 10:10:13	低密度脂蛋白	3.65	mmol/l	健康人群:1.8-3.36;心脑血管疾病危险人群:<2.59	M	2015-07-18 09:35:30	部分凝血活酶时间	30	S	22-45	M	2015-07-18 10:10:13	*总胆固醇	6.16	mmol/l	3.6-5.17	H	2015-07-18 09:35:30	D二聚体	70	ng/ml	0-115	M	2015-07-18 10:45:22	*葡萄糖	5.08	mmol/l	3.89-6.11	M	2015-07-18 09:35:30	C反应蛋白	0.18	mg/l	0-8	M	2015-07-18 09:20:49	凝血酶原时间(PT)	10	S	42992	M	2015-07-18 10:10:13
141	1000083546001	凝血酶原国际比值	0.97		0.72-1.29	M	2011-07-16 08:29:50	低密度脂蛋白	2.23	mmol/l	2.7-3.36	L	2011-07-16 09:12:34	部分凝血活酶时间	29.3	S	22-45	M	2011-07-16 08:29:50	*总胆固醇	3.91	mmol/l	42800	M	2011-07-16 09:12:34	D二聚体	1905	ng/ml	0-256	H	2011-07-30 07:53:58	*葡萄糖	5.69	mmol/l	3-6.1	M	2011-07-16 09:12:34	C反应蛋白	15	mg/l	0-8	H	2011-07-16 09:12:34	凝血酶原时间(PT)	11.1	S	42991	M	2011-07-16 08:29:50
142	1000084014001	凝血酶原国际比值	0.87		0.72-1.29	M	2011-07-21 10:40:46	低密度脂蛋白	2.26	mmol/l	2.7-3.36	L	2011-07-21 09:49:02	部分凝血活酶时间	25.6	S	22-45	M	2011-07-21 10:40:46	*总胆固醇	4.12	mmol/l	42800	M	2011-07-21 09:49:02	D二聚体	219	ng/ml	0-256	M	2011-07-21 13:05:08	*葡萄糖	4.53	mmol/l	3-6.1	M	2011-07-21 09:49:02	C反应蛋白	10.2	mg/l	0-8	H	2011-07-21 09:49:02	凝血酶原时间(PT)	10	S	42991	M	2011-07-21 10:40:46
143	1000084107001	凝血酶原国际比值	1.05		0.72-1.29	M	2011-07-22 09:15:31	低密度脂蛋白	4	mmol/l	2.7-3.36	H	2011-07-22 09:18:42	部分凝血活酶时间	31	S	22-45	M	2011-07-22 09:15:31	*总胆固醇	5.47	mmol/l	42800	M	2011-07-22 09:18:42	D二聚体	49	ng/ml	0-256	M	2011-08-16 08:45:05	*葡萄糖	4.98	mmol/l	3-6.1	M	2011-07-22 09:18:42	C反应蛋白	2.6	mg/l	0-8	M	2011-07-22 09:21:51	凝血酶原时间(PT)	12.1	S	42991	M	2011-07-22 09:15:31
144	1000084289001	凝血酶原国际比值	1.06		0.72-1.29	M	2011-07-25 08:51:18	低密度脂蛋白	3.68	mmol/l	2.7-3.36	H	2011-07-25 09:34:33	部分凝血活酶时间	27.8	S	22-45	M	2011-07-25 08:51:18	*总胆固醇	5.99	mmol/l	42800	M	2011-07-25 09:34:33	D二聚体	1958	ng/ml	0-256	H	2011-07-25 15:01:16	*葡萄糖	6.4	mmol/l	3-6.1	H	2011-07-25 09:34:33	C反应蛋白	9.3	mg/l	0-8	H	2011-07-27 09:33:18	凝血酶原时间(PT)	12.2	S	42991	M	2011-07-25 08:51:18
145	1000084395001	凝血酶原国际比值	1.02		0.72-1.29	M	2011-07-25 11:57:52	低密度脂蛋白	3.91	mmol/l	2.7-3.36	H	2011-07-25 11:37:23	部分凝血活酶时间	23.2	S	22-45	M	2011-07-25 11:57:52	*总胆固醇	5.85	mmol/l	42800	M	2011-07-25 11:37:23	D二聚体	6895	ng/ml	0-256	H	2011-07-28 17:31:42	*葡萄糖	5.15	mmol/l	3-6.1	M	2011-07-25 11:37:23	C反应蛋白	6.6	mg/l	0-8	M	2011-07-25 11:37:23	凝血酶原时间(PT)	11.7	S	42991	M	2011-07-25 11:57:52
146	1000084495001	凝血酶原国际比值	0.95		0.72-1.29	M	2011-07-27 09:26:49	低密度脂蛋白	2.8	mmol/l	2.7-3.36	M	2011-07-27 09:03:32	部分凝血活酶时间	22.9	S	22-45	M	2011-07-27 09:26:49	*总胆固醇	5.18	mmol/l	42800	M	2011-07-27 09:03:32	D二聚体	1933	ng/ml	0-256	H	2011-08-02 10:00:47	*葡萄糖	7.96	mmol/l	3-6.1	H	2011-07-27 09:03:32	C反应蛋白	10	mg/l	0-8	H	2011-07-27 09:18:42	凝血酶原时间(PT)	10.9	S	42991	M	2011-07-27 09:26:49
147	1000084589002	凝血酶原国际比值	0.99		0.72-1.29	M	2011-08-25 09:16:29	低密度脂蛋白	2.03	mmol/l	2.7-3.36	L	2011-08-29 07:33:49	部分凝血活酶时间	26.2	S	22-45	M	2011-08-25 09:16:29	*总胆固醇	3.5	mmol/l	42800	M	2011-08-29 07:33:49	D二聚体	634	ng/ml	0-256	H	2011-08-29 08:04:27	*葡萄糖	4.3	mmol/l	3-6.1	M	2011-08-29 07:33:49	C反应蛋白	19.3	mg/l	0-8	H	2011-08-25 09:19:10	凝血酶原时间(PT)	11.4	S	42991	M	2011-08-25 09:16:29
148	1000084589003	凝血酶原国际比值	0.99		0.72-1.29	M	2011-10-13 10:16:39	低密度脂蛋白	2.77	mmol/l	2.7-3.36	M	2011-10-13 10:07:44	部分凝血活酶时间	27.9	S	22-45	M	2011-10-13 10:16:39	*总胆固醇	3.63	mmol/l	42800	M	2011-10-13 09:41:10	D二聚体	326	ng/ml	0-256	H	2011-10-13 10:16:39	*葡萄糖	4.81	mmol/l	3-6.1	M	2011-10-13 09:41:10	C反应蛋白	52.8	mg/l	0-8	H	2011-10-13 09:41:10	凝血酶原时间(PT)	11.4	S	42991	M	2011-10-13 10:16:39
149	1000084695001	凝血酶原国际比值	0.9		0.72-1.29	M	2011-07-28 11:09:01	低密度脂蛋白	3.89	mmol/l	2.7-3.36	H	2011-07-28 11:42:41	部分凝血活酶时间	19.8	S	22-45	L	2011-07-28 11:09:01	*总胆固醇	5.85	mmol/l	42800	M	2011-07-28 11:42:41	D二聚体	171	ng/ml	0-256	M	2011-07-28 11:09:01	*葡萄糖	6.3	mmol/l	3-6.1	H	2011-07-28 11:42:41	C反应蛋白	6.4	mg/l	0-8	M	2011-07-28 11:42:41	凝血酶原时间(PT)	10.4	S	42991	M	2011-07-28 11:09:01
150	1000084696001	凝血酶原国际比值	0.88		0.72-1.29	M	2011-07-28 11:04:22	低密度脂蛋白	2.48	mmol/l	2.7-3.36	L	2011-07-28 11:41:20	部分凝血活酶时间	20.9	S	22-45	L	2011-07-28 11:04:22	*总胆固醇	4.4	mmol/l	42800	M	2011-07-28 11:41:20	D二聚体	120	ng/ml	0-256	M	2011-08-01 10:07:36	*葡萄糖	6.54	mmol/l	3-6.1	H	2011-07-28 11:41:20	C反应蛋白	4.7	mg/l	0-8	M	2011-07-28 11:39:07	凝血酶原时间(PT)	10.1	S	42991	M	2011-07-28 11:04:22
151	1000084775001	凝血酶原国际比值	0.98		0.72-1.29	M	2011-07-29 09:38:48	低密度脂蛋白	1.85	mmol/l	2.7-3.36	L	2011-07-29 09:27:47	部分凝血活酶时间	27	S	22-45	M	2011-07-29 09:38:48	*总胆固醇	3.1	mmol/l	42800	M	2011-07-29 09:27:47	D二聚体	2122	ng/ml	0-256	H	2011-07-29 10:17:08	*葡萄糖	5.93	mmol/l	3-6.1	M	2011-07-29 09:27:47	C反应蛋白	3.4	mg/l	0-8	M	2011-07-29 09:27:47	凝血酶原时间(PT)	11.3	S	42991	M	2011-07-29 09:38:48
152	1000084852001	凝血酶原国际比值	0.99		0.72-1.29	M	2011-07-30 09:27:40	低密度脂蛋白	2.5	mmol/l	2.7-3.36	L	2011-07-30 09:08:30	部分凝血活酶时间	29	S	22-45	M	2011-07-30 09:27:40	*总胆固醇	3.77	mmol/l	42800	M	2011-07-30 09:08:30	D二聚体	67	ng/ml	0-256	M	2011-08-03 07:16:32	*葡萄糖	5.81	mmol/l	3-6.1	M	2011-07-30 09:08:30	C反应蛋白	4.3	mg/l	0-8	M	2011-07-30 08:55:41	凝血酶原时间(PT)	11.4	S	42991	M	2011-07-30 09:27:40
153	1000085065001	凝血酶原国际比值	0.97		0.72-1.29	M	2011-08-02 10:05:03	低密度脂蛋白	3.17	mmol/l	2.7-3.36	M	2011-08-02 10:25:01	部分凝血活酶时间	26.9	S	22-45	M	2011-08-02 10:05:03	*总胆固醇	5.3	mmol/l	42800	M	2011-08-02 10:25:01	D二聚体	268	ng/ml	0-256	H	2011-08-16 08:50:19	*葡萄糖	4.87	mmol/l	3-6.1	M	2011-08-02 10:25:01	C反应蛋白	3.6	mg/l	0-8	M	2011-08-02 09:26:13	凝血酶原时间(PT)	11.2	S	42991	M	2011-08-02 10:05:03
154	1000085222001	凝血酶原国际比值	1.02		0.72-1.29	M	2011-08-04 10:42:24	低密度脂蛋白	1.02	mmol/l	2.7-3.36	L	2011-08-04 09:28:24	部分凝血活酶时间	38	S	22-45	M	2011-08-04 10:42:24	*总胆固醇	2.55	mmol/l	42800	L	2011-08-04 09:28:24	D二聚体	404	ng/ml	0-256	H	2011-08-04 10:42:24	*葡萄糖	6.24	mmol/l	3-6.1	H	2011-08-04 09:28:24	C反应蛋白	161.4	mg/l	0-8	H	2011-08-04 09:28:24	凝血酶原时间(PT)	11.7	S	42991	M	2011-08-04 10:42:24
155	1000085238001	凝血酶原国际比值	0.96		0.72-1.29	M	2011-08-04 09:36:16	低密度脂蛋白	2.42	mmol/l	2.7-3.36	L	2011-08-04 09:28:58	部分凝血活酶时间	23.6	S	22-45	M	2011-08-04 09:36:16	*总胆固醇	4.01	mmol/l	42800	M	2011-08-04 09:28:58	D二聚体	309	ng/ml	0-256	H	2011-08-04 09:36:16	*葡萄糖	5.09	mmol/l	3-6.1	M	2011-08-04 09:28:58	C反应蛋白	64.9	mg/l	0-8	H	2011-08-04 09:28:58	凝血酶原时间(PT)	11	S	42991	M	2011-08-04 09:36:16
156	1000085246001	凝血酶原国际比值	0.9		0.72-1.29	M	2011-08-04 10:11:17	低密度脂蛋白	2.55	mmol/l	2.7-3.36	L	2011-08-04 09:25:32	部分凝血活酶时间	21.1	S	22-45	L	2011-08-04 10:11:17	*总胆固醇	4.48	mmol/l	42800	M	2011-08-04 09:25:32	D二聚体	297	ng/ml	0-256	H	2011-08-04 10:11:17	*葡萄糖	6.6	mmol/l	3-6.1	H	2011-08-04 09:25:32	C反应蛋白	10.5	mg/l	0-8	H	2011-08-04 09:12:06	凝血酶原时间(PT)	10.4	S	42991	M	2011-08-04 10:11:17
157	1000085307001	凝血酶原国际比值	1.02		0.72-1.29	M	2011-08-05 10:10:06	低密度脂蛋白	1.73	mmol/l	2.7-3.36	L	2011-08-05 09:24:53	部分凝血活酶时间	39.4	S	22-45	M	2011-08-05 10:10:06	*总胆固醇	3.58	mmol/l	42800	M	2011-08-05 09:24:53	D二聚体	268	ng/ml	0-256	H	2011-09-06 09:57:02	*葡萄糖	4.88	mmol/l	3-6.1	M	2011-08-05 09:24:53	C反应蛋白	86.4	mg/l	0-8	H	2011-08-05 09:29:10	凝血酶原时间(PT)	11.7	S	42991	M	2011-08-05 10:10:06
158	1000085329001	凝血酶原国际比值	0.84		0.72-1.29	M	2011-08-05 10:27:16	低密度脂蛋白	1.95	mmol/l	2.7-3.36	L	2011-08-05 10:04:31	部分凝血活酶时间	23.6	S	22-45	M	2011-08-05 10:27:16	*总胆固醇	3.75	mmol/l	42800	M	2011-08-05 10:04:31	D二聚体	301	ng/ml	0-256	H	2011-08-05 10:27:16	*葡萄糖	3.79	mmol/l	3-6.1	M	2011-08-05 10:04:31	C反应蛋白	12.4	mg/l	0-8	H	2011-08-05 10:04:31	凝血酶原时间(PT)	9.7	S	42991	M	2011-08-05 10:27:16
159	1000085630001	凝血酶原国际比值	1.03		0.72-1.29	M	2011-08-09 09:50:43	低密度脂蛋白	1.95	mmol/l	2.7-3.36	L	2011-08-09 09:34:45	部分凝血活酶时间	33.4	S	22-45	M	2011-08-09 09:50:43	*总胆固醇	3.36	mmol/l	42800	M	2011-08-09 09:34:45	D二聚体	1455	ng/ml	0-256	H	2011-09-07 07:53:08	*葡萄糖	4.7	mmol/l	3-6.1	M	2011-08-09 09:34:45	C反应蛋白	80.6	mg/l	0-8	H	2011-08-09 09:34:45	凝血酶原时间(PT)	11.9	S	42991	M	2011-08-09 09:50:43
160	1000085688001	凝血酶原国际比值	1		0.72-1.29	M	2011-08-09 09:12:12	低密度脂蛋白	2.63	mmol/l	2.7-3.36	L	2011-08-09 09:37:39	部分凝血活酶时间	26.1	S	22-45	M	2011-08-09 09:12:12	*总胆固醇	3.57	mmol/l	42800	M	2011-08-09 09:03:54	D二聚体	252	ng/ml	0-256	M	2011-08-16 08:40:02	*葡萄糖	5.84	mmol/l	3-6.1	M	2011-08-09 09:03:54	C反应蛋白	10.1	mg/l	0-8	H	2011-08-12 09:29:09	凝血酶原时间(PT)	11.5	S	42991	M	2011-08-09 09:12:12
161	1000085775001	凝血酶原国际比值	1.02		0.72-1.29	M	2011-08-10 10:27:12	低密度脂蛋白	3.09	mmol/l	2.7-3.36	M	2011-08-10 09:07:52	部分凝血活酶时间	28.9	S	22-45	M	2011-08-10 10:27:12	*总胆固醇	4.83	mmol/l	42800	M	2011-08-10 09:07:52	D二聚体	956	ng/ml	0-256	H	2011-08-13 07:18:48	*葡萄糖	4.9	mmol/l	3-6.1	M	2011-08-10 09:07:52	C反应蛋白	7.4	mg/l	0-8	M	2011-08-10 09:04:50	凝血酶原时间(PT)	11.7	S	42991	M	2011-08-10 10:27:12
162	1000085840001	凝血酶原国际比值	0.88		0.72-1.29	M	2011-08-11 09:43:32	低密度脂蛋白	4	mmol/l	2.7-3.36	H	2011-08-11 09:35:56	部分凝血活酶时间	24.2	S	22-45	M	2011-08-11 09:43:32	*总胆固醇	6.24	mmol/l	42800	H	2011-08-11 09:35:56	D二聚体	766	ng/ml	0-256	H	2011-08-17 08:55:33	*葡萄糖	4.74	mmol/l	3-6.1	M	2011-08-11 09:35:56	C反应蛋白	17.7	mg/l	0-8	H	2011-08-11 09:35:56	凝血酶原时间(PT)	10.1	S	42991	M	2011-08-11 09:43:32
163	1000085892001	凝血酶原国际比值	1		0.72-1.29	M	2011-08-11 10:04:49	低密度脂蛋白	2.83	mmol/l	2.7-3.36	M	2011-08-11 09:16:12	部分凝血活酶时间	26	S	22-45	M	2011-08-11 10:04:49	*总胆固醇	4.82	mmol/l	42800	M	2011-08-11 09:16:12	D二聚体	478	ng/ml	0-256	H	2011-08-17 11:42:30	*葡萄糖	4.7	mmol/l	3-6.1	M	2011-08-11 09:16:12	C反应蛋白	6.3	mg/l	0-8	M	2011-08-11 09:16:12	凝血酶原时间(PT)	11.5	S	42991	M	2011-08-11 10:04:49
164	1000085949001	凝血酶原国际比值	0.78		0.72-1.29	M	2011-08-12 10:20:57	低密度脂蛋白	4.04	mmol/l	2.7-3.36	H	2011-08-12 09:40:32	部分凝血活酶时间	21.1	S	22-45	L	2011-08-12 10:20:57	*总胆固醇	6.35	mmol/l	42800	H	2011-08-12 09:40:32	D二聚体	56	ng/ml	0-256	M	2011-08-19 11:43:49	*葡萄糖	5.43	mmol/l	3-6.1	M	2011-08-12 09:40:32	C反应蛋白	3.9	mg/l	0-8	M	2011-08-12 09:40:32	凝血酶原时间(PT)	9	S	42991	M	2011-08-12 10:20:57
165	1000085988001	凝血酶原国际比值	1		0.72-1.29	M	2011-08-12 10:07:35	低密度脂蛋白	2.48	mmol/l	2.7-3.36	L	2011-08-12 09:40:34	部分凝血活酶时间	28.9	S	22-45	M	2011-08-12 10:07:35	*总胆固醇	4.52	mmol/l	42800	M	2011-08-12 09:40:34	D二聚体	649	ng/ml	0-256	H	2011-08-17 08:52:19	*葡萄糖	4.05	mmol/l	3-6.1	M	2011-08-12 09:40:34	C反应蛋白	3.4	mg/l	0-8	M	2011-08-12 09:40:34	凝血酶原时间(PT)	11.5	S	42991	M	2011-08-12 10:07:35
166	1000086026001	凝血酶原国际比值	0.98		0.72-1.29	M	2011-08-13 10:48:54	低密度脂蛋白	2.92	mmol/l	2.7-3.36	M	2011-08-13 10:51:25	部分凝血活酶时间	31.4	S	22-45	M	2011-08-13 10:48:54	*总胆固醇	4.8	mmol/l	42800	M	2011-08-13 10:51:25	D二聚体	164	ng/ml	0-256	M	2011-08-13 10:48:54	*葡萄糖	4.51	mmol/l	3-6.1	M	2011-08-13 10:51:25	C反应蛋白	1.9	mg/l	0-8	M	2011-08-13 10:51:25	凝血酶原时间(PT)	11.3	S	42991	M	2011-08-13 10:48:54
167	1000086034001	凝血酶原国际比值	1.03		0.72-1.29	M	2011-08-13 08:43:43	低密度脂蛋白	3.43	mmol/l	2.7-3.36	H	2011-08-13 09:25:53	部分凝血活酶时间	27.3	S	22-45	M	2011-08-13 08:43:43	*总胆固醇	6.29	mmol/l	42800	H	2011-08-13 09:25:53	D二聚体	3004	ng/ml	0-256	H	2011-08-18 07:24:40	*葡萄糖	5.01	mmol/l	3-6.1	M	2011-08-13 09:25:53	C反应蛋白	2.7	mg/l	0-8	M	2011-08-13 09:12:04	凝血酶原时间(PT)	11.8	S	42991	M	2011-08-13 08:43:43
168	1000086089001	凝血酶原国际比值	0.98		0.72-1.29	M	2011-08-13 09:50:04	低密度脂蛋白	1.6	mmol/l	2.7-3.36	L	2011-08-13 09:12:17	部分凝血活酶时间	25.2	S	22-45	M	2011-08-13 09:50:04	*总胆固醇	3.84	mmol/l	42800	M	2011-08-13 09:12:17	D二聚体	937	ng/ml	0-256	H	2011-08-18 18:24:53	*葡萄糖	5.79	mmol/l	3-6.1	M	2011-08-13 09:12:17	C反应蛋白	187.7	mg/l	0-8	H	2011-08-24 07:08:52	凝血酶原时间(PT)	11.3	S	42991	M	2011-08-13 09:50:04
169	1000086309001	凝血酶原国际比值	1.02		0.72-1.29	M	2011-08-16 11:08:16	低密度脂蛋白	2.86	mmol/l	2.7-3.36	M	2011-08-16 09:52:25	部分凝血活酶时间	29	S	22-45	M	2011-08-16 11:08:16	*总胆固醇	5.45	mmol/l	42800	M	2011-08-16 09:52:25	D二聚体	345	ng/ml	0-256	H	2011-08-16 11:08:16	*葡萄糖	6.12	mmol/l	3-6.1	H	2011-08-16 09:52:25	C反应蛋白	84	mg/l	0-8	H	2011-08-16 09:52:25	凝血酶原时间(PT)	11.7	S	42991	M	2011-08-16 11:08:16
170	1000086324001	凝血酶原国际比值	0.93		0.72-1.29	M	2011-08-16 10:35:05	低密度脂蛋白	2.91	mmol/l	2.7-3.36	M	2011-08-16 09:50:56	部分凝血活酶时间	25.3	S	22-45	M	2011-08-16 10:35:05	*总胆固醇	5.61	mmol/l	42800	M	2011-08-16 09:50:56	D二聚体	1911	ng/ml	0-256	H	2011-08-25 08:14:47	*葡萄糖	4.48	mmol/l	3-6.1	M	2011-08-16 09:50:56	C反应蛋白	10.5	mg/l	0-8	H	2011-08-16 09:50:56	凝血酶原时间(PT)	10.7	S	42991	M	2011-08-16 10:35:05
171	1000086367001	凝血酶原国际比值	0.88		0.72-1.29	M	2011-08-17 09:49:49	低密度脂蛋白	1.71	mmol/l	2.7-3.36	L	2011-08-17 09:10:34	部分凝血活酶时间	24.1	S	22-45	M	2011-08-17 09:49:49	*总胆固醇	3.86	mmol/l	42800	M	2011-08-17 09:10:34	D二聚体	154	ng/ml	0-256	M	2011-08-17 09:07:59	*葡萄糖	5.35	mmol/l	3-6.1	M	2011-08-17 09:10:34	C反应蛋白	5.4	mg/l	0-8	M	2011-08-17 09:10:18	凝血酶原时间(PT)	10.1	S	42991	M	2011-08-17 09:49:49
172	1000086403001	凝血酶原国际比值	0.9		0.72-1.29	M	2011-08-17 10:05:39	低密度脂蛋白	3.02	mmol/l	2.7-3.36	M	2011-08-17 09:10:00	部分凝血活酶时间	26.7	S	22-45	M	2011-08-17 10:05:39	*总胆固醇	5.05	mmol/l	42800	M	2011-08-17 09:10:00	D二聚体	154	ng/ml	0-256	M	2011-08-25 07:20:34	*葡萄糖	4.83	mmol/l	3-6.1	M	2011-08-17 09:10:00	C反应蛋白	2.5	mg/l	0-8	M	2011-08-17 09:10:00	凝血酶原时间(PT)	10.4	S	42991	M	2011-08-17 10:05:39
173	1000086478001	凝血酶原国际比值	0.95		0.72-1.29	M	2011-08-18 11:08:27	低密度脂蛋白	2.8	mmol/l	2.7-3.36	M	2011-08-18 11:21:00	部分凝血活酶时间	29.7	S	22-45	M	2011-08-18 11:08:27	*总胆固醇	4.95	mmol/l	42800	M	2011-08-18 11:21:00	D二聚体	298	ng/ml	0-256	H	2011-08-25 07:25:29	*葡萄糖	4.27	mmol/l	3-6.1	M	2011-08-18 11:21:00	C反应蛋白	7.3	mg/l	0-8	M	2011-08-18 11:25:16	凝血酶原时间(PT)	10.9	S	42991	M	2011-08-18 11:08:27
174	1000086494001	凝血酶原国际比值	0.9		0.72-1.29	M	2011-08-18 09:19:48	低密度脂蛋白	2.41	mmol/l	2.7-3.36	L	2011-08-18 09:45:43	部分凝血活酶时间	23.5	S	22-45	M	2011-08-18 09:19:48	*总胆固醇	4.92	mmol/l	42800	M	2011-08-18 09:45:43	D二聚体	14	ng/ml	0-256	M	2011-08-26 07:14:07	*葡萄糖	4.47	mmol/l	3-6.1	M	2011-08-18 09:45:43	C反应蛋白	4.9	mg/l	0-8	M	2011-08-18 09:45:43	凝血酶原时间(PT)	10.4	S	42991	M	2011-08-18 09:19:48
175	1000086572001	凝血酶原国际比值	0.94		0.72-1.29	M	2011-08-19 08:42:48	低密度脂蛋白	2.72	mmol/l	2.7-3.36	M	2011-08-19 09:06:15	部分凝血活酶时间	28.1	S	22-45	M	2011-08-19 08:42:48	*总胆固醇	5.15	mmol/l	42800	M	2011-08-19 09:06:15	D二聚体	1208	ng/ml	0-256	H	2011-08-31 09:03:24	*葡萄糖	5.18	mmol/l	3-6.1	M	2011-08-19 09:06:15	C反应蛋白	4.5	mg/l	0-8	M	2011-08-20 11:00:52	凝血酶原时间(PT)	10.8	S	42991	M	2011-08-19 08:42:48
176	1000086580002	凝血酶原国际比值	1		0.7-1.3	M	2016-06-25 09:45:07	低密度脂蛋白	3.86	mmol/l	健康人群:1.8-3.36;心脑血管疾病危险人群:<2.59	M	2016-06-25 10:04:46	部分凝血活酶时间	26.4	S	20-40	M	2016-06-25 10:19:04	*总胆固醇	5.88	mmol/l	3.6-5.17	H	2016-06-25 10:04:46	D二聚体	100	ng/ml	0-115	M	2016-06-25 10:19:04	*葡萄糖	6.97	mmol/l	3.89-6.11	H	2016-06-25 10:04:46	C反应蛋白	1	mg/l	0-8	M	2016-06-25 10:04:46	凝血酶原时间(PT)	11.5	S	42992	M	2016-06-25 09:45:07
177	1000086668001	凝血酶原国际比值	1.08		0.72-1.29	M	2011-09-07 07:28:19	低密度脂蛋白	2.28	mmol/l	2.7-3.36	L	2011-09-07 07:35:56	部分凝血活酶时间	37.5	S	22-45	M	2011-09-07 07:28:19	*总胆固醇	3.5	mmol/l	42800	M	2011-09-07 07:35:56	D二聚体	919	ng/ml	0-256	H	2011-09-07 07:28:19	*葡萄糖	6.6	mmol/l	3-6.1	H	2011-09-07 07:35:56	C反应蛋白	43.8	mg/l	0-8	H	2011-09-01 08:46:04	凝血酶原时间(PT)	12.4	S	42991	M	2011-09-07 07:28:19
178	1000086688001	凝血酶原国际比值	0.88		0.72-1.29	M	2011-08-20 08:51:48	低密度脂蛋白	5.08	mmol/l	2.7-3.36	H	2011-08-20 09:11:45	部分凝血活酶时间	19.4	S	22-45	L	2011-08-20 08:51:48	*总胆固醇	9.04	mmol/l	42800	H	2011-08-20 09:11:45	D二聚体	291	ng/ml	0-256	H	2011-08-20 08:51:48	*葡萄糖	11.81	mmol/l	3-6.1	H	2011-08-20 09:11:45	C反应蛋白	71.9	mg/l	0-8	H	2011-08-20 09:11:45	凝血酶原时间(PT)	10.1	S	42991	M	2011-08-20 08:51:48
179	1000086722001	凝血酶原国际比值	0.94		0.72-1.29	M	2011-08-20 09:04:27	低密度脂蛋白	2.7	mmol/l	2.7-3.36	M	2011-08-20 09:10:58	部分凝血活酶时间	28.5	S	22-45	M	2011-08-20 09:04:27	*总胆固醇	5	mmol/l	42800	M	2011-08-20 09:10:58	D二聚体	209	ng/ml	0-256	M	2011-09-24 11:03:59	*葡萄糖	6.31	mmol/l	3-6.1	H	2011-08-20 09:10:58	C反应蛋白	13.7	mg/l	0-8	H	2011-08-25 11:20:29	凝血酶原时间(PT)	10.8	S	42991	M	2011-08-20 09:04:27
180	1000086825001	凝血酶原国际比值	1.02		0.72-1.29	M	2011-08-22 09:15:34	低密度脂蛋白	2.44	mmol/l	2.7-3.36	L	2011-08-22 08:53:01	部分凝血活酶时间	32.2	S	22-45	M	2011-08-22 09:15:34	*总胆固醇	4.19	mmol/l	42800	M	2011-08-22 08:53:01	D二聚体	211	ng/ml	0-256	M	2011-08-24 09:49:28	*葡萄糖	4.46	mmol/l	3-6.1	M	2011-08-22 08:53:01	C反应蛋白	52.3	mg/l	0-8	H	2011-08-22 08:54:39	凝血酶原时间(PT)	11.7	S	42991	M	2011-08-22 09:15:34
181	1000086877001	凝血酶原国际比值	1.14		0.72-1.29	M	2011-08-23 10:49:44	低密度脂蛋白	2.71	mmol/l	2.7-3.36	M	2011-08-23 09:31:51	部分凝血活酶时间	28.1	S	22-45	M	2011-08-23 10:49:44	*总胆固醇	5.31	mmol/l	42800	M	2011-08-23 09:31:51	D二聚体	726	ng/ml	0-256	H	2011-08-23 10:49:44	*葡萄糖	4.82	mmol/l	3-6.1	M	2011-08-23 09:31:51	C反应蛋白	30.9	mg/l	0-8	H	2011-08-23 09:31:51	凝血酶原时间(PT)	13.1	S	42991	H	2011-08-23 10:59:16
182	1000086907001	凝血酶原国际比值	0.87		0.72-1.29	M	2011-08-23 10:53:29	低密度脂蛋白	3.57	mmol/l	2.7-3.36	H	2011-08-23 09:36:00	部分凝血活酶时间	23.6	S	22-45	M	2011-08-23 10:53:29	*总胆固醇	5.94	mmol/l	42800	M	2011-08-23 09:36:00	D二聚体	245	ng/ml	0-256	M	2011-08-23 10:53:29	*葡萄糖	4.75	mmol/l	3-6.1	M	2011-08-23 09:36:00	C反应蛋白	4.6	mg/l	0-8	M	2011-08-23 09:36:00	凝血酶原时间(PT)	10	S	42991	M	2011-08-23 10:53:29
183	1000087040001	凝血酶原国际比值	0.87		0.72-1.29	M	2011-08-23 14:41:16	低密度脂蛋白	3.72	mmol/l	2.7-3.36	H	2011-08-23 14:18:43	部分凝血活酶时间	23.2	S	22-45	M	2011-08-23 14:41:16	*总胆固醇	6	mmol/l	42800	M	2011-08-23 14:18:43	D二聚体	371	ng/ml	0-256	H	2011-08-30 07:51:56	*葡萄糖	4.5	mmol/l	3-6.1	M	2011-08-23 14:18:43	C反应蛋白	4.7	mg/l	0-8	M	2011-08-23 14:13:11	凝血酶原时间(PT)	10	S	42991	M	2011-08-23 14:41:16
184	1000087076001	凝血酶原国际比值	1.07		0.72-1.29	M	2011-08-24 09:25:40	低密度脂蛋白	1.91	mmol/l	2.7-3.36	L	2011-08-24 08:53:38	部分凝血活酶时间	48.2	S	22-45	H	2011-08-24 09:25:40	*总胆固醇	3.82	mmol/l	42800	M	2011-08-24 08:53:39	D二聚体	1527	ng/ml	0-256	H	2011-08-27 10:24:18	*葡萄糖	5.06	mmol/l	3-6.1	M	2011-08-24 08:53:38	C反应蛋白	101.9	mg/l	0-8	H	2011-08-25 09:34:11	凝血酶原时间(PT)	12.3	S	42991	M	2011-08-24 09:25:40
185	1000087084001	凝血酶原国际比值	0.97		0.72-1.29	M	2011-08-24 08:40:18	低密度脂蛋白	2.16	mmol/l	2.7-3.36	L	2011-08-24 08:51:35	部分凝血活酶时间	23.5	S	22-45	M	2011-08-24 08:40:18	*总胆固醇	4.05	mmol/l	42800	M	2011-08-24 08:51:35	D二聚体	236	ng/ml	0-256	M	2011-09-01 07:15:21	*葡萄糖	7.52	mmol/l	3-6.1	H	2011-08-24 08:51:35	C反应蛋白	3.4	mg/l	0-8	M	2011-08-24 08:51:35	凝血酶原时间(PT)	11.2	S	42991	M	2011-08-24 08:40:18
186	1000087286001	凝血酶原国际比值	0.92		0.72-1.29	M	2011-08-26 09:40:56	低密度脂蛋白	2.92	mmol/l	2.7-3.36	M	2011-08-26 09:37:20	部分凝血活酶时间	25.6	S	22-45	M	2011-08-26 09:40:56	*总胆固醇	5.85	mmol/l	42800	M	2011-08-26 09:37:20	D二聚体	807	ng/ml	0-256	H	2011-09-01 07:20:36	*葡萄糖	4.32	mmol/l	3-6.1	M	2011-08-26 09:37:20	C反应蛋白	3.9	mg/l	0-8	M	2011-08-26 09:37:20	凝血酶原时间(PT)	10.6	S	42991	M	2011-08-26 09:40:56
187	1000087509001	凝血酶原国际比值	0.98		0.72-1.29	M	2011-08-29 10:41:16	低密度脂蛋白	2.23	mmol/l	2.7-3.36	L	2011-08-29 10:21:46	部分凝血活酶时间	26.1	S	22-45	M	2011-08-29 10:41:16	*总胆固醇	5.05	mmol/l	42800	M	2011-08-29 10:21:46	D二聚体	142	ng/ml	0-256	M	2011-08-29 11:25:02	*葡萄糖	5.38	mmol/l	3-6.1	M	2011-08-29 10:21:46	C反应蛋白	51	mg/l	0-8	H	2011-08-29 10:21:46	凝血酶原时间(PT)	11.3	S	42991	M	2011-08-29 10:41:16
188	1000087582001	凝血酶原国际比值	0.89		0.72-1.29	M	2011-08-30 08:43:15	低密度脂蛋白	2.97	mmol/l	2.7-3.36	M	2011-08-30 09:18:33	部分凝血活酶时间	28.5	S	22-45	M	2011-08-30 08:43:15	*总胆固醇	4.81	mmol/l	42800	M	2011-08-30 09:18:33	D二聚体	232	ng/ml	0-256	M	2011-09-06 07:31:41	*葡萄糖	4.75	mmol/l	3-6.1	M	2011-08-30 09:18:33	C反应蛋白	46.4	mg/l	0-8	H	2011-08-30 09:18:34	凝血酶原时间(PT)	10.2	S	42991	M	2011-08-30 08:43:15
189	1000087629001	凝血酶原国际比值	0.98		0.72-1.29	M	2011-10-22 07:12:52	低密度脂蛋白	2.61	mmol/l	2.7-3.36	L	2011-10-14 09:24:48	部分凝血活酶时间	29.9	S	22-45	M	2011-10-22 07:12:52	*总胆固醇	4.87	mmol/l	42800	M	2011-10-14 09:24:48	D二聚体	303	ng/ml	0-256	H	2011-10-22 07:12:52	*葡萄糖	5.8	mmol/l	3-6.1	M	2011-10-14 09:24:48	C反应蛋白	38.8	mg/l	0-8	H	2011-10-14 09:24:48	凝血酶原时间(PT)	11.3	S	42991	M	2011-10-22 07:12:52
190	1000087670001	凝血酶原国际比值	0.94		0.72-1.29	M	2011-08-31 09:42:44	低密度脂蛋白	4.79	mmol/l	2.7-3.36	H	2011-08-31 09:03:52	部分凝血活酶时间	25.6	S	22-45	M	2011-08-31 09:42:44	*总胆固醇	7.84	mmol/l	42800	H	2011-08-31 09:03:52	D二聚体	960	ng/ml	0-256	H	2011-09-07 07:21:38	*葡萄糖	6.71	mmol/l	3-6.1	H	2011-08-31 09:03:52	C反应蛋白	3.6	mg/l	0-8	M	2011-08-31 09:03:52	凝血酶原时间(PT)	10.8	S	42991	M	2011-08-31 09:42:44
191	1000088071001	凝血酶原国际比值	1.04		0.72-1.29	M	2011-09-05 09:23:30	低密度脂蛋白	2.23	mmol/l	2.7-3.36	L	2011-09-05 09:33:25	部分凝血活酶时间	33.7	S	22-45	M	2011-09-05 09:23:30	*总胆固醇	4.98	mmol/l	42800	M	2011-09-05 09:33:25	D二聚体	1782	ng/ml	0-256	H	2011-09-20 12:10:12	*葡萄糖	5.32	mmol/l	3-6.1	M	2011-09-05 09:33:25	C反应蛋白	12.4	mg/l	0-8	H	2011-09-05 11:00:19	凝血酶原时间(PT)	12	S	42991	M	2011-09-05 09:23:30
192	1000088100001	凝血酶原国际比值	0.87		0.72-1.29	M	2011-09-05 11:43:09	低密度脂蛋白	3.2	mmol/l	2.7-3.36	M	2011-09-05 13:24:42	部分凝血活酶时间	23.5	S	22-45	M	2011-09-05 11:43:09	*总胆固醇	6.36	mmol/l	42800	H	2011-09-05 13:24:42	D二聚体	155	ng/ml	0-256	M	2011-09-05 11:43:09	*葡萄糖	4.5	mmol/l	3-6.1	M	2011-09-05 13:24:42	C反应蛋白	3.5	mg/l	0-8	M	2011-09-05 13:24:42	凝血酶原时间(PT)	10	S	42991	M	2011-09-05 11:43:09
193	1000088128001	凝血酶原国际比值	0.97		0.72-1.29	M	2011-09-06 10:32:03	低密度脂蛋白	3.14	mmol/l	2.7-3.36	M	2011-09-06 09:30:26	部分凝血活酶时间	23.4	S	22-45	M	2011-09-06 10:32:03	*总胆固醇	5.63	mmol/l	42800	M	2011-09-06 09:30:26	D二聚体	58	ng/ml	0-256	M	2011-09-06 10:32:03	*葡萄糖	4.06	mmol/l	3-6.1	M	2011-09-06 09:30:26	C反应蛋白	3.1	mg/l	0-8	M	2011-09-06 09:30:26	凝血酶原时间(PT)	11.2	S	42991	M	2011-09-06 10:32:03
194	1000088163001	凝血酶原国际比值	0.97		0.72-1.29	M	2011-09-06 08:47:52	低密度脂蛋白	2.06	mmol/l	2.7-3.36	L	2011-09-06 09:04:02	部分凝血活酶时间	33.7	S	22-45	M	2011-09-06 08:47:52	*总胆固醇	4.07	mmol/l	42800	M	2011-09-06 09:04:02	D二聚体	343	ng/ml	0-256	H	2011-09-15 09:29:01	*葡萄糖	4.71	mmol/l	3-6.1	M	2011-09-06 09:04:02	C反应蛋白	74.8	mg/l	0-8	H	2011-09-06 09:39:21	凝血酶原时间(PT)	11.1	S	42991	M	2011-09-06 08:47:52
195	1000088232001	凝血酶原国际比值	0.9		0.72-1.29	M	2011-09-07 08:53:49	低密度脂蛋白	2.55	mmol/l	2.7-3.36	L	2011-09-07 09:08:21	部分凝血活酶时间	27.3	S	22-45	M	2011-09-07 08:53:49	*总胆固醇	4.61	mmol/l	42800	M	2011-09-07 09:08:21	D二聚体	81	ng/ml	0-256	M	2011-09-07 10:11:39	*葡萄糖	4.78	mmol/l	3-6.1	M	2011-09-07 09:08:21	C反应蛋白	11.4	mg/l	0-8	H	2011-09-07 09:08:21	凝血酶原时间(PT)	10.4	S	42991	M	2011-09-07 08:53:49
196	1000088268001	凝血酶原国际比值	0.9		0.72-1.29	M	2011-09-07 08:55:49	低密度脂蛋白	2.62	mmol/l	2.7-3.36	L	2011-09-07 09:31:35	部分凝血活酶时间	28.8	S	22-45	M	2011-09-07 08:55:49	*总胆固醇	5.33	mmol/l	42800	M	2011-09-07 09:31:35	D二聚体	1055	ng/ml	0-256	H	2011-09-10 07:57:03	*葡萄糖	4.99	mmol/l	3-6.1	M	2011-09-07 09:31:35	C反应蛋白	31.7	mg/l	0-8	H	2011-09-07 09:31:02	凝血酶原时间(PT)	10.4	S	42991	M	2011-09-07 08:55:49
197	1000088345001	凝血酶原国际比值	0.86		0.72-1.29	M	2011-09-08 10:58:29	低密度脂蛋白	2.62	mmol/l	2.7-3.36	L	2011-09-08 11:10:16	部分凝血活酶时间	26	S	22-45	M	2011-09-08 10:58:31	*总胆固醇	4.45	mmol/l	42800	M	2011-09-08 11:10:16	D二聚体	7	ng/ml	0-256	M	2011-09-10 11:17:51	*葡萄糖	4.32	mmol/l	3-6.1	M	2011-09-08 11:10:16	C反应蛋白	3.6	mg/l	0-8	M	2011-09-08 11:10:16	凝血酶原时间(PT)	9.9	S	42991	M	2011-09-08 10:58:26
198	1000088352001	凝血酶原国际比值	0.97		0.72-1.29	M	2011-09-08 09:54:05	低密度脂蛋白	2.31	mmol/l	2.7-3.36	L	2011-09-08 09:18:30	部分凝血活酶时间	31.9	S	22-45	M	2011-09-08 09:54:05	*总胆固醇	4.72	mmol/l	42800	M	2011-09-08 09:18:30	D二聚体	781	ng/ml	0-256	H	2011-09-10 07:58:38	*葡萄糖	5.61	mmol/l	3-6.1	M	2011-09-08 09:18:30	C反应蛋白	41.6	mg/l	0-8	H	2011-09-08 09:18:30	凝血酶原时间(PT)	11.2	S	42991	M	2011-09-08 09:54:05
199	1000088542001	凝血酶原国际比值	1.07		0.72-1.29	M	2011-09-10 09:47:43	低密度脂蛋白	1.24	mmol/l	2.7-3.36	L	2011-09-10 09:26:52	部分凝血活酶时间	33.9	S	22-45	M	2011-09-10 09:47:43	*总胆固醇	2.86	mmol/l	42800	L	2011-09-10 09:26:52	D二聚体	114	ng/ml	0-256	M	2011-09-13 10:37:29	*葡萄糖	6.03	mmol/l	3-6.1	M	2011-09-10 09:26:52	C反应蛋白	10.6	mg/l	0-8	H	2011-09-10 09:26:52	凝血酶原时间(PT)	12.3	S	42991	M	2011-09-10 09:47:43
200	1000088731001	凝血酶原国际比值	0.89		0.72-1.29	M	2011-09-14 08:54:14	低密度脂蛋白	3.78	mmol/l	2.7-3.36	H	2011-09-14 09:42:19	部分凝血活酶时间	25.2	S	22-45	M	2011-09-14 08:54:14	*总胆固醇	6.56	mmol/l	42800	H	2011-09-14 09:42:19	D二聚体	1353	ng/ml	0-256	H	2011-09-17 07:44:30	*葡萄糖	4.4	mmol/l	3-6.1	M	2011-09-14 09:42:19	C反应蛋白	2.8	mg/l	0-8	M	2011-09-14 09:42:19	凝血酶原时间(PT)	10.2	S	42991	M	2011-09-14 08:54:14
201	1000088734001	凝血酶原国际比值	1.07		0.72-1.29	M	2011-09-14 09:26:22	低密度脂蛋白	2.13	mmol/l	2.7-3.36	L	2011-09-14 09:28:59	部分凝血活酶时间	31.3	S	22-45	M	2011-09-14 09:26:22	*总胆固醇	4.4	mmol/l	42800	M	2011-09-14 09:28:59	D二聚体	36	ng/ml	0-256	M	2011-09-14 09:26:22	*葡萄糖	4.84	mmol/l	3-6.1	M	2011-09-14 09:28:59	C反应蛋白	2.2	mg/l	0-8	M	2011-09-14 09:28:59	凝血酶原时间(PT)	12.3	S	42991	M	2011-09-14 09:26:22
202	1000088814002	凝血酶原国际比值	1.04		0.7-1.3	M	2016-12-03 09:38:29	低密度脂蛋白	2.53	mmol/l	健康人群:1.8-3.36;心脑血管疾病危险人群:<2.59	M	2016-12-03 08:58:42	部分凝血活酶时间	24.9	S	20-40	M	2016-12-03 09:38:29	*总胆固醇	3.92	mmol/l	3.6-5.17	M	2016-12-03 08:58:42	D二聚体	7650	ng/ml	0-115	H	2016-12-03 09:38:29	*葡萄糖	16.51	mmol/l	3.89-6.11	H	2016-12-03 08:58:42	C反应蛋白	20.44	mg/l	0-8	H	2016-12-03 08:58:42	凝血酶原时间(PT)	11.9	S	42992	M	2016-12-03 09:38:29
203	1000088840001	凝血酶原国际比值	0.84		0.72-1.29	M	2011-09-15 10:08:25	低密度脂蛋白	2.79	mmol/l	2.7-3.36	M	2011-09-15 09:01:31	部分凝血活酶时间	25	S	22-45	M	2011-09-15 10:08:25	*总胆固醇	6.36	mmol/l	42800	H	2011-09-15 09:01:31	D二聚体	126	ng/ml	0-256	M	2011-09-15 10:08:25	*葡萄糖	4.88	mmol/l	3-6.1	M	2011-09-15 09:01:31	C反应蛋白	4.4	mg/l	0-8	M	2011-09-18 10:44:07	凝血酶原时间(PT)	9.7	S	42991	M	2011-09-15 10:08:25
204	1000088898001	凝血酶原国际比值	0.97		0.72-1.29	M	2011-09-15 09:58:00	低密度脂蛋白	1.64	mmol/l	2.7-3.36	L	2011-09-15 09:18:00	部分凝血活酶时间	24.9	S	22-45	M	2011-09-15 09:58:00	*总胆固醇	3.97	mmol/l	42800	M	2011-09-15 09:18:00	D二聚体	727	ng/ml	0-256	H	2011-09-15 09:58:00	*葡萄糖	4.86	mmol/l	3-6.1	M	2011-09-15 09:18:00	C反应蛋白	21.7	mg/l	0-8	H	2011-09-15 09:18:00	凝血酶原时间(PT)	11.1	S	42991	M	2011-09-15 09:58:00
205	1000088956004	凝血酶原国际比值	0.96		0.7-1.3	M	2017-01-04 11:02:24	低密度脂蛋白	2.87	mmol/l	健康人群:1.8-3.36;心脑血管疾病危险人群:<2.59	M	2017-01-04 10:00:02	部分凝血活酶时间	32.2	S	25-45	M	2017-01-04 11:00:03	*总胆固醇	5.24	mmol/l	3.6-5.17	H	2017-01-04 10:00:02	D二聚体	4461	ng/ml	0-115	H	2017-01-04 10:25:03	*葡萄糖	9.44	mmol/l	3.89-6.11	H	2017-01-04 10:00:02	C反应蛋白	8.9	mg/l	0-8	H	2017-01-04 10:00:33	凝血酶原时间(PT)	11.9	S	43023	M	2017-01-04 11:02:24
206	1000089144001	凝血酶原国际比值	0.97		0.72-1.29	M	2011-09-18 09:21:17	低密度脂蛋白	2.17	mmol/l	2.7-3.36	L	2011-09-18 08:53:16	部分凝血活酶时间	22.2	S	22-45	M	2011-09-18 09:21:17	*总胆固醇	4.17	mmol/l	42800	M	2011-09-18 08:53:16	D二聚体	1585	ng/ml	0-256	H	2011-09-28 10:51:58	*葡萄糖	6.53	mmol/l	3-6.1	H	2011-09-18 08:53:16	C反应蛋白	10	mg/l	0-8	H	2011-09-18 08:53:16	凝血酶原时间(PT)	11.2	S	42991	M	2011-09-18 09:21:17
207	1000089235002	凝血酶原国际比值	1.04		0.7-1.3	M	2016-07-17 09:57:28	低密度脂蛋白	1.5	mmol/l	健康人群:1.8-3.36;心脑血管疾病危险人群:<2.59	M	2016-07-17 10:56:05	部分凝血活酶时间	29.4	S	20-40	M	2016-07-17 09:57:28	*总胆固醇	3.4	mmol/l	3.6-5.17	L	2016-07-17 10:56:05	D二聚体	4630	ng/ml	0-115	H	2016-07-17 09:57:28	*葡萄糖	5.4	mmol/l	3.89-6.11	M	2016-07-17 10:56:05	C反应蛋白	24.2	mg/l	0-8	H	2016-07-17 10:56:05	凝血酶原时间(PT)	11.9	S	42992	M	2016-07-17 09:57:28
208	1000089269001	凝血酶原国际比值	0.9		0.72-1.29	M	2011-09-19 12:04:52	低密度脂蛋白	5.16	mmol/l	2.7-3.36	H	2011-09-19 12:51:54	部分凝血活酶时间	25.9	S	22-45	M	2011-09-19 12:04:52	*总胆固醇	7	mmol/l	42800	H	2011-09-19 12:51:54	D二聚体	177	ng/ml	0-256	M	2011-09-19 12:04:52	*葡萄糖	4.7	mmol/l	3-6.1	M	2011-09-19 12:51:54	C反应蛋白	5.7	mg/l	0-8	M	2011-09-19 12:51:54	凝血酶原时间(PT)	10.4	S	42991	M	2011-09-19 12:04:52
209	1000089296004	凝血酶原国际比值	1.34		0.7-1.3	H	2016-09-22 10:06:17	低密度脂蛋白	2.3	mmol/l	健康人群:1.8-3.36;心脑血管疾病危险人群:<2.59	M	2016-09-21 16:37:06	部分凝血活酶时间	50.9	S	20-40	H	2016-09-22 10:06:17	*总胆固醇	4.5	mmol/l	3.6-5.17	M	2016-09-21 16:37:06	D二聚体	940	ng/ml	0-115	H	2016-09-22 10:06:17	*葡萄糖	8	mmol/l	3.89-6.11	H	2016-09-21 16:37:06	C反应蛋白	75.1	mg/l	0-8	H	2016-09-21 16:37:06	凝血酶原时间(PT)	15.6	S	42992	H	2016-09-22 10:06:17
210	1000089306001	凝血酶原国际比值	0.92		0.72-1.29	M	2011-09-20 08:57:26	低密度脂蛋白	3.41	mmol/l	2.7-3.36	H	2011-09-20 10:10:01	部分凝血活酶时间	27.2	S	22-45	M	2011-09-20 08:57:26	*总胆固醇	6.64	mmol/l	42800	H	2011-09-20 10:10:01	D二聚体	22	ng/ml	0-256	M	2011-09-21 13:13:01	*葡萄糖	5.73	mmol/l	3-6.1	M	2011-09-20 10:10:01	C反应蛋白	28	mg/l	0-8	H	2011-09-20 10:10:01	凝血酶原时间(PT)	10.6	S	42991	M	2011-09-20 08:57:26
211	1000089389001	凝血酶原国际比值	0.9		0.72-1.29	M	2011-09-20 09:17:56	低密度脂蛋白	2.39	mmol/l	2.7-3.36	L	2011-09-20 09:32:25	部分凝血活酶时间	24.5	S	22-45	M	2011-09-20 09:17:56	*总胆固醇	4.8	mmol/l	42800	M	2011-09-20 09:32:25	D二聚体	279	ng/ml	0-256	H	2011-09-20 09:17:56	*葡萄糖	6.52	mmol/l	3-6.1	H	2011-09-20 09:32:25	C反应蛋白	3	mg/l	0-8	M	2011-09-20 09:32:25	凝血酶原时间(PT)	10.4	S	42991	M	2011-09-20 09:17:56
212	1000089421001	凝血酶原国际比值	0.88		0.72-1.29	M	2011-09-21 09:35:37	低密度脂蛋白	3.46	mmol/l	2.7-3.36	H	2011-09-21 09:48:17	部分凝血活酶时间	22	S	22-45	M	2011-09-21 09:35:37	*总胆固醇	5.94	mmol/l	42800	M	2011-09-21 09:48:17	D二聚体	1374	ng/ml	0-256	H	2011-09-29 11:16:35	*葡萄糖	4.25	mmol/l	3-6.1	M	2011-09-21 09:48:17	C反应蛋白	4.2	mg/l	0-8	M	2011-09-21 09:48:17	凝血酶原时间(PT)	10.1	S	42991	M	2011-09-21 09:35:37
213	1000089507001	凝血酶原国际比值	0.93		0.72-1.29	M	2011-09-22 10:12:09	低密度脂蛋白	2.66	mmol/l	2.7-3.36	L	2011-09-22 09:25:25	部分凝血活酶时间	29.7	S	22-45	M	2011-09-22 10:12:09	*总胆固醇	5.18	mmol/l	42800	M	2011-09-22 09:25:25	D二聚体	814	ng/ml	0-256	H	2011-09-27 18:11:57	*葡萄糖	5.86	mmol/l	3-6.1	M	2011-09-22 09:25:25	C反应蛋白	3.4	mg/l	0-8	M	2011-09-22 09:34:12	凝血酶原时间(PT)	10.7	S	42991	M	2011-09-22 10:12:09
214	1000089627001	凝血酶原国际比值	0.87		0.72-1.29	M	2011-09-23 09:11:18	低密度脂蛋白	2.96	mmol/l	2.7-3.36	M	2011-09-23 08:56:53	部分凝血活酶时间	23.9	S	22-45	M	2011-09-23 09:11:18	*总胆固醇	5.72	mmol/l	42800	M	2011-09-23 08:56:53	D二聚体	2112	ng/ml	0-256	H	2011-09-29 09:19:44	*葡萄糖	6.97	mmol/l	3-6.1	H	2011-09-23 08:56:53	C反应蛋白	8.5	mg/l	0-8	H	2011-09-23 09:04:54	凝血酶原时间(PT)	10	S	42991	M	2011-09-23 09:11:18
215	1000089657001	凝血酶原国际比值	1.08		0.72-1.29	M	2011-09-23 09:15:03	低密度脂蛋白	1.77	mmol/l	2.7-3.36	L	2011-09-23 09:26:30	部分凝血活酶时间	32.5	S	22-45	M	2011-09-23 09:15:03	*总胆固醇	3.48	mmol/l	42800	M	2011-09-23 09:26:30	D二聚体	6050	ng/ml	0-256	H	2011-09-23 11:33:11	*葡萄糖	6.16	mmol/l	3-6.1	H	2011-09-23 09:26:30	C反应蛋白	29.6	mg/l	0-8	H	2011-09-23 09:26:30	凝血酶原时间(PT)	12.4	S	42991	M	2011-09-23 09:15:03
216	1000089700001	凝血酶原国际比值	0.9		0.72-1.29	M	2011-09-24 08:46:33	低密度脂蛋白	2.43	mmol/l	2.7-3.36	L	2011-09-24 08:49:16	部分凝血活酶时间	24.7	S	22-45	M	2011-09-24 08:46:33	*总胆固醇	6.06	mmol/l	42800	H	2011-09-24 08:49:16	D二聚体	1272	ng/ml	0-256	H	2011-09-30 07:23:45	*葡萄糖	5.69	mmol/l	3-6.1	M	2011-09-24 08:49:16	C反应蛋白	9.9	mg/l	0-8	H	2011-09-24 08:46:50	凝血酶原时间(PT)	10.4	S	42991	M	2011-09-24 08:46:33
217	1000089906001	凝血酶原国际比值	0.9		0.72-1.29	M	2011-09-27 08:59:03	低密度脂蛋白	2.49	mmol/l	2.7-3.36	L	2011-10-03 10:26:38	部分凝血活酶时间	21.8	S	22-45	L	2011-09-27 08:59:03	*总胆固醇	3.6	mmol/l	42800	M	2011-10-03 10:26:38	D二聚体	292	ng/ml	0-256	H	2011-10-09 07:33:29	*葡萄糖	4.4	mmol/l	3-6.1	M	2011-10-03 10:26:38	C反应蛋白	3.1	mg/l	0-8	M	2011-09-29 09:46:26	凝血酶原时间(PT)	10.4	S	42991	M	2011-09-27 08:59:03
218	1000090012001	凝血酶原国际比值	0.94		0.72-1.29	M	2011-09-28 09:28:07	低密度脂蛋白	3.02	mmol/l	2.7-3.36	M	2011-09-28 09:54:02	部分凝血活酶时间	27.1	S	22-45	M	2011-09-28 09:28:07	*总胆固醇	5.01	mmol/l	42800	M	2011-09-28 09:54:02	D二聚体	222	ng/ml	0-256	M	2011-09-28 09:28:07	*葡萄糖	5.41	mmol/l	3-6.1	M	2011-09-28 09:54:02	C反应蛋白	2.7	mg/l	0-8	M	2011-09-28 09:54:02	凝血酶原时间(PT)	10.8	S	42991	M	2011-09-28 09:28:07
219	1000090025001	凝血酶原国际比值	0.95		0.72-1.29	M	2011-09-28 10:02:17	低密度脂蛋白	2.34	mmol/l	2.7-3.36	L	2011-09-28 09:53:33	部分凝血活酶时间	30.6	S	22-45	M	2011-09-28 10:02:17	*总胆固醇	4.33	mmol/l	42800	M	2011-09-28 09:53:33	D二聚体	1780	ng/ml	0-256	H	2011-10-07 07:48:34	*葡萄糖	4.08	mmol/l	3-6.1	M	2011-09-28 09:53:33	C反应蛋白	3.6	mg/l	0-8	M	2011-09-28 09:53:50	凝血酶原时间(PT)	10.9	S	42991	M	2011-09-28 10:02:17
220	1000090163001	凝血酶原国际比值	1.01		0.72-1.29	M	2011-09-29 09:56:45	低密度脂蛋白	1.9	mmol/l	2.7-3.36	L	2011-09-29 09:27:59	部分凝血活酶时间	27.1	S	22-45	M	2011-09-29 09:56:45	*总胆固醇	3.98	mmol/l	42800	M	2011-09-29 09:27:59	D二聚体	1793	ng/ml	0-256	H	2011-09-29 10:22:55	*葡萄糖	5.01	mmol/l	3-6.1	M	2011-09-29 09:27:59	C反应蛋白	15.4	mg/l	0-8	H	2011-09-29 09:27:59	凝血酶原时间(PT)	11.6	S	42991	M	2011-09-29 09:56:45
221	1000090805001	凝血酶原国际比值	0.92		0.72-1.29	M	2011-10-08 09:34:52	低密度脂蛋白	2.1	mmol/l	2.7-3.36	L	2011-10-08 09:40:53	部分凝血活酶时间	27.7	S	22-45	M	2011-10-08 09:34:52	*总胆固醇	4.39	mmol/l	42800	M	2011-10-08 09:40:53	D二聚体	243	ng/ml	0-256	M	2011-10-08 09:34:52	*葡萄糖	5.1	mmol/l	3-6.1	M	2011-10-08 09:40:53	C反应蛋白	16.7	mg/l	0-8	H	2011-10-08 09:40:53	凝血酶原时间(PT)	10.6	S	42991	M	2011-10-08 09:34:52
222	1000090807001	凝血酶原国际比值	1		0.72-1.29	M	2011-10-08 09:29:49	低密度脂蛋白	2.81	mmol/l	2.7-3.36	M	2011-10-08 09:28:44	部分凝血活酶时间	25.4	S	22-45	M	2011-10-08 09:29:49	*总胆固醇	4.8	mmol/l	42800	M	2011-10-08 09:28:44	D二聚体	635	ng/ml	0-256	H	2011-10-08 09:29:49	*葡萄糖	5.18	mmol/l	3-6.1	M	2011-10-08 09:28:44	C反应蛋白	58.2	mg/l	0-8	H	2011-10-08 09:28:44	凝血酶原时间(PT)	11.5	S	42991	M	2011-10-08 09:29:49
223	1000091050002	凝血酶原国际比值	0.92		0.72-1.29	M	2011-11-03 10:16:07	低密度脂蛋白	3.35	mmol/l	2.7-3.36	M	2011-11-10 07:46:10	部分凝血活酶时间	23.5	S	22-45	M	2011-11-03 10:16:07	*总胆固醇	5	mmol/l	42800	M	2011-11-10 07:46:10	D二聚体	350	ng/ml	0-256	H	2011-11-03 10:43:31	*葡萄糖	7.9	mmol/l	3-6.1	H	2011-11-10 07:46:10	C反应蛋白	7.7	mg/l	0-8	M	2011-11-09 07:48:13	凝血酶原时间(PT)	10.6	S	42991	M	2011-11-03 10:16:07
224	1000091119001	凝血酶原国际比值	0.86		0.72-1.29	M	2011-10-11 08:45:59	低密度脂蛋白	2.71	mmol/l	2.7-3.36	M	2011-10-11 10:31:11	部分凝血活酶时间	23.9	S	22-45	M	2011-10-11 08:45:59	*总胆固醇	5.55	mmol/l	42800	M	2011-10-11 10:31:11	D二聚体	337	ng/ml	0-256	H	2011-10-19 07:17:54	*葡萄糖	4.83	mmol/l	3-6.1	M	2011-10-11 10:31:11	C反应蛋白	3.6	mg/l	0-8	M	2011-10-12 09:10:57	凝血酶原时间(PT)	9.9	S	42991	M	2011-10-11 08:45:59
225	1000091119002	凝血酶原国际比值	0.87		0.7-1.3	M	2014-10-28 10:46:09	低密度脂蛋白	3.19	mmol/l	健康人群:1.8-3.36;心脑血管疾病危险人群:<2.59	M	2014-10-28 11:39:51	部分凝血活酶时间	31	S	22-45	M	2014-10-28 10:40:52	*总胆固醇	6.1	mmol/l	3.6-5.17	H	2014-10-28 11:39:51	D二聚体	60	ng/ml	0-115	M	2014-10-28 11:48:14	*葡萄糖	4.6	mmol/l	3.89-6.11	M	2014-10-28 11:39:51	C反应蛋白	1.9	mg/l	0-8	M	2014-10-28 11:39:51	凝血酶原时间(PT)	11.5	S	43023	M	2014-10-28 10:46:09
226	1000091177001	凝血酶原国际比值	0.88		0.72-1.29	M	2011-10-12 08:51:42	低密度脂蛋白	3.03	mmol/l	2.7-3.36	M	2011-10-12 09:10:58	部分凝血活酶时间	26	S	22-45	M	2011-10-12 08:51:42	*总胆固醇	5.09	mmol/l	42800	M	2011-10-12 09:10:58	D二聚体	99	ng/ml	0-256	M	2011-10-12 08:51:42	*葡萄糖	6.12	mmol/l	3-6.1	H	2011-10-12 09:10:58	C反应蛋白	2.7	mg/l	0-8	M	2011-10-12 09:10:58	凝血酶原时间(PT)	10.1	S	42991	M	2011-10-12 08:51:42
227	1000091253001	凝血酶原国际比值	0.9		0.72-1.29	M	2011-10-12 11:45:29	低密度脂蛋白	2.58	mmol/l	2.7-3.36	L	2011-10-12 13:19:54	部分凝血活酶时间	26.7	S	22-45	M	2011-10-12 11:45:29	*总胆固醇	6.4	mmol/l	42800	H	2011-10-12 13:19:54	D二聚体	1206	ng/ml	0-256	H	2011-10-19 07:16:12	*葡萄糖	5.9	mmol/l	3-6.1	M	2011-10-12 13:19:54	C反应蛋白	71.9	mg/l	0-8	H	2011-10-13 09:17:02	凝血酶原时间(PT)	10.3	S	42991	M	2011-10-12 11:45:29
228	1000091500001	凝血酶原国际比值	0.98		0.72-1.29	M	2011-10-15 10:00:30	低密度脂蛋白	1.86	mmol/l	2.7-3.36	L	2011-10-15 10:42:34	部分凝血活酶时间	36.9	S	22-45	M	2011-10-15 10:00:30	*总胆固醇	3.64	mmol/l	42800	M	2011-10-15 10:42:34	D二聚体	496	ng/ml	0-256	H	2011-12-10 10:00:47	*葡萄糖	4.55	mmol/l	3-6.1	M	2011-10-15 10:42:34	C反应蛋白	141.3	mg/l	0-8	H	2011-10-15 10:42:23	凝血酶原时间(PT)	11.3	S	42991	M	2011-10-15 10:00:30
229	1000092092001	凝血酶原国际比值	0.87		0.72-1.29	M	2011-10-20 10:45:26	低密度脂蛋白	2.74	mmol/l	2.7-3.36	M	2011-10-20 10:03:40	部分凝血活酶时间	24.2	S	22-45	M	2011-10-20 10:45:26	*总胆固醇	6.08	mmol/l	42800	H	2011-10-20 10:03:40	D二聚体	453	ng/ml	0-256	H	2011-10-27 23:58:54	*葡萄糖	4.52	mmol/l	3-6.1	M	2011-10-20 10:03:40	C反应蛋白	3.9	mg/l	0-8	M	2011-10-20 10:03:40	凝血酶原时间(PT)	10	S	42991	M	2011-10-20 10:45:26
230	1000092098001	凝血酶原国际比值	0.94		0.72-1.29	M	2011-10-20 10:05:26	低密度脂蛋白	2.68	mmol/l	2.7-3.36	L	2011-10-20 09:39:25	部分凝血活酶时间	28.2	S	22-45	M	2011-10-20 10:05:26	*总胆固醇	4.82	mmol/l	42800	M	2011-10-20 09:39:25	D二聚体	1283	ng/ml	0-256	H	2011-10-21 10:59:50	*葡萄糖	4.7	mmol/l	3-6.1	M	2011-10-20 09:39:25	C反应蛋白	20.5	mg/l	0-8	H	2011-10-20 09:39:25	凝血酶原时间(PT)	10.8	S	42991	M	2011-10-20 10:05:26
231	1000092541001	凝血酶原国际比值	0.99		0.72-1.29	M	2011-10-24 10:51:52	低密度脂蛋白	3.14	mmol/l	2.7-3.36	M	2011-10-24 11:09:13	部分凝血活酶时间	27.9	S	22-45	M	2011-10-24 10:51:52	*总胆固醇	5.65	mmol/l	42800	M	2011-10-24 11:09:13	D二聚体	74	ng/ml	0-256	M	2011-10-24 10:51:52	*葡萄糖	6.11	mmol/l	3-6.1	H	2011-10-24 11:09:13	C反应蛋白	5.7	mg/l	0-8	M	2011-10-24 11:09:13	凝血酶原时间(PT)	11.4	S	42991	M	2011-10-24 10:51:52
232	1000092943001	凝血酶原国际比值	0.93		0.72-1.29	M	2011-10-27 11:17:05	低密度脂蛋白	3.02	mmol/l	2.7-3.36	M	2011-10-27 10:37:08	部分凝血活酶时间	31.8	S	22-45	M	2011-10-27 11:17:05	*总胆固醇	5.84	mmol/l	42800	M	2011-10-27 10:37:08	D二聚体	40	ng/ml	0-256	M	2011-10-28 10:39:04	*葡萄糖	5.84	mmol/l	3-6.1	M	2011-10-27 10:37:08	C反应蛋白	4.2	mg/l	0-8	M	2011-10-27 10:37:08	凝血酶原时间(PT)	10.7	S	42991	M	2011-10-27 11:17:05
233	1000093066005	凝血酶原国际比值	0.81		0.7-1.3	M	2015-09-25 09:29:48	低密度脂蛋白	3.21	mmol/l	健康人群:1.8-3.36;心脑血管疾病危险人群:<2.59	M	2015-09-25 09:23:53	部分凝血活酶时间	23.8	S	22-45	M	2015-09-25 09:55:29	*总胆固醇	5.56	mmol/l	3.6-5.17	H	2015-09-25 09:23:53	D二聚体	170	ng/ml	0-115	H	2015-09-25 09:29:48	*葡萄糖	4.99	mmol/l	3.89-6.11	M	2015-09-25 09:23:53	C反应蛋白	3.6	mg/l	0-8	M	2015-09-26 11:08:16	凝血酶原时间(PT)	9.4	S	42992	M	2015-09-25 09:29:48
234	1000093161001	凝血酶原国际比值	1.05		0.72-1.29	M	2011-10-29 09:48:20	低密度脂蛋白	2.12	mmol/l	2.7-3.36	L	2011-11-12 07:29:28	部分凝血活酶时间	28.5	S	22-45	M	2011-10-29 09:48:20	*总胆固醇	3.1	mmol/l	42800	M	2011-11-12 07:29:28	D二聚体	1676	ng/ml	0-256	H	2011-10-29 09:48:20	*葡萄糖	8.3	mmol/l	3-6.1	H	2011-11-12 07:29:28	C反应蛋白	141	mg/l	0-8	H	2011-11-04 10:15:09	凝血酶原时间(PT)	12.1	S	42991	M	2011-10-29 09:48:20
235	1000093323002	凝血酶原国际比值	1		0.7-1.3	M	2016-06-13 11:39:36	低密度脂蛋白	1.54	mmol/l	健康人群:1.8-3.36;心脑血管疾病危险人群:<2.59	M	2016-06-13 13:02:34	部分凝血活酶时间	24.9	S	20-40	M	2016-06-13 11:39:36	*总胆固醇	3.56	mmol/l	3.6-5.17	L	2016-06-13 13:02:34	D二聚体	130	ng/ml	0-115	H	2016-06-13 11:39:36	*葡萄糖	5.19	mmol/l	3.89-6.11	M	2016-06-13 13:02:34	C反应蛋白	1.01	mg/l	0-8	M	2016-06-13 13:29:02	凝血酶原时间(PT)	11.5	S	42992	M	2016-06-13 11:39:36
236	1000093496001	凝血酶原国际比值	1.14		0.72-1.29	M	2011-11-01 12:53:38	低密度脂蛋白	1.58	mmol/l	2.7-3.36	L	2011-11-01 12:47:28	部分凝血活酶时间	26.1	S	22-45	M	2011-11-01 12:53:38	*总胆固醇	2.8	mmol/l	42800	L	2011-11-01 12:47:28	D二聚体	5983	ng/ml	0-256	H	2011-11-01 13:22:38	*葡萄糖	6	mmol/l	3-6.1	M	2011-11-01 12:47:28	C反应蛋白	217.9	mg/l	0-8	H	2011-11-01 12:47:28	凝血酶原时间(PT)	13.1	S	42991	H	2011-11-01 12:53:38
237	1000093832001	凝血酶原国际比值	0.87		0.72-1.29	M	2011-11-04 11:17:16	低密度脂蛋白	3.6	mmol/l	2.7-3.36	H	2011-11-04 10:19:27	部分凝血活酶时间	24.2	S	22-45	M	2011-11-04 11:17:16	*总胆固醇	6.4	mmol/l	42800	H	2011-11-04 10:19:27	D二聚体	72	ng/ml	0-256	M	2011-11-04 11:17:16	*葡萄糖	4.47	mmol/l	3-6.1	M	2011-11-04 10:19:27	C反应蛋白	3.4	mg/l	0-8	M	2011-11-04 10:19:27	凝血酶原时间(PT)	10	S	42991	M	2011-11-04 11:17:16
238	1000094114001	凝血酶原国际比值	0.94		0.72-1.29	M	2011-11-05 23:46:53	低密度脂蛋白	1.56	mmol/l	2.7-3.36	L	2011-11-06 08:51:17	部分凝血活酶时间	26.2	S	22-45	M	2011-11-05 23:46:53	*总胆固醇	3.6	mmol/l	42800	M	2011-11-06 08:51:17	D二聚体	1099	ng/ml	0-256	H	2011-11-05 23:46:53	*葡萄糖	5.2	mmol/l	3-6.1	M	2011-11-06 08:51:17	C反应蛋白	52.1	mg/l	0-8	H	2011-11-06 08:51:17	凝血酶原时间(PT)	10.8	S	42991	M	2011-11-05 23:46:53
239	1000094207001	凝血酶原国际比值	0.93		0.72-1.29	M	2011-11-07 14:21:21	低密度脂蛋白	2.56	mmol/l	2.7-3.36	L	2011-11-07 13:38:57	部分凝血活酶时间	27.4	S	22-45	M	2011-11-07 14:21:21	*总胆固醇	4.5	mmol/l	42800	M	2011-11-07 13:38:57	D二聚体	0	ng/ml	0-256	M	2011-11-07 14:21:21	*葡萄糖	7.9	mmol/l	3-6.1	H	2011-11-07 13:38:57	C反应蛋白	5.7	mg/l	0-8	M	2011-11-07 13:38:57	凝血酶原时间(PT)	10.7	S	42991	M	2011-11-07 14:21:21
240	1000095263001	凝血酶原国际比值	0.83		0.72-1.29	M	2011-11-15 13:20:01	低密度脂蛋白	4.6	mmol/l	2.7-3.36	H	2011-11-15 12:49:02	部分凝血活酶时间	26.1	S	22-45	M	2011-11-15 13:20:01	*总胆固醇	6.8	mmol/l	42800	H	2011-11-15 12:49:02	D二聚体	16	ng/ml	0-256	M	2011-11-15 13:27:32	*葡萄糖	5.3	mmol/l	3-6.1	M	2011-11-15 12:49:02	C反应蛋白	4.2	mg/l	0-8	M	2011-11-15 12:49:02	凝血酶原时间(PT)	9.5	S	42991	M	2011-11-15 13:20:01
241	1000097685001	凝血酶原国际比值	0.83		0.72-1.29	M	2011-12-02 10:34:02	低密度脂蛋白	2.17	mmol/l	2.7-3.36	L	2011-12-02 09:46:52	部分凝血活酶时间	26.7	S	22-45	M	2011-12-02 10:34:02	*总胆固醇	4.08	mmol/l	42800	M	2011-12-02 09:46:52	D二聚体	274	ng/ml	0-256	H	2011-12-02 10:34:02	*葡萄糖	5.13	mmol/l	3-6.1	M	2011-12-02 09:46:52	C反应蛋白	50.5	mg/l	0-8	H	2011-12-02 09:46:52	凝血酶原时间(PT)	9.6	S	42991	M	2011-12-02 10:34:02
242	1000098855011	凝血酶原国际比值	0.9		0.7-1.3	M	2015-08-24 13:29:19	低密度脂蛋白	2.21	mmol/l	健康人群:1.8-3.36;心脑血管疾病危险人群:<2.59	M	2015-08-25 08:52:00	部分凝血活酶时间	27.9	S	22-45	M	2015-08-24 13:29:19	*总胆固醇	3.89	mmol/l	3.6-5.17	M	2015-08-25 08:52:00	D二聚体	20	ng/ml	0-115	M	2015-08-24 13:29:19	*葡萄糖	5.9	mmol/l	3.89-6.11	M	2015-08-25 08:52:00	C反应蛋白	0.29	mg/l	0-8	M	2015-08-25 08:52:00	凝血酶原时间(PT)	10.4	S	42992	M	2015-08-24 13:29:19
243	1000100402005	凝血酶原国际比值	0.94		0.7-1.3	M	2017-03-11 11:21:59	低密度脂蛋白	4.46	mmol/l	健康人群:1.8-3.36;心脑血管疾病危险人群:<2.59	M	2017-03-11 11:35:08	部分凝血活酶时间	23.4	S	20-40	M	2017-03-11 11:21:59	*总胆固醇	7.83	mmol/l	3.6-5.17	H	2017-03-11 11:35:08	D二聚体	720	ng/ml	0-115	H	2017-03-11 11:21:59	*葡萄糖	5.22	mmol/l	3.89-6.11	M	2017-03-11 11:35:08	C反应蛋白	1.37	mg/l	0-8	M	2017-03-11 11:35:08	凝血酶原时间(PT)	10.8	S	42992	M	2017-03-11 11:21:59
244	1000100732003	凝血酶原国际比值	1.2		0.7-1.3	M	2017-01-10 18:30:38	低密度脂蛋白	2.44	mmol/l	健康人群:1.8-3.36;心脑血管疾病危险人群:<2.59	M	2017-01-10 18:29:46	部分凝血活酶时间	29.7	S	20-40	M	2017-01-10 18:30:38	*总胆固醇	4.7	mmol/l	3.6-5.17	M	2017-01-10 18:29:46	D二聚体	120	ng/ml	0-115	H	2017-01-10 18:30:38	*葡萄糖	4.5	mmol/l	3.89-6.11	M	2017-01-10 18:29:45	C反应蛋白	47	mg/l	0-8	H	2017-01-12 15:33:19	凝血酶原时间(PT)	13.8	S	42992	M	2017-01-10 18:30:38
245	1000101257006	凝血酶原国际比值	1.12		0.7-1.3	M	2016-11-06 09:28:05	低密度脂蛋白	1.6	mmol/l	健康人群:1.8-3.36;心脑血管疾病危险人群:<2.59	M	2016-11-06 11:19:57	部分凝血活酶时间	41.7	S	20-40	H	2016-11-06 09:24:18	*总胆固醇	4.4	mmol/l	3.6-5.17	M	2016-11-06 11:19:57	D二聚体	477	ng/ml	0-115	H	2016-11-08 11:09:04	*葡萄糖	6.3	mmol/l	3.89-6.11	H	2016-11-06 11:19:57	C反应蛋白	6.5	mg/l	0-8	M	2016-11-06 11:19:57	凝血酶原时间(PT)	13.8	S	43023	M	2016-11-06 09:28:05
246	1000101603002	凝血酶原国际比值	1.54		0.7-1.3	H	2016-03-09 16:21:12	低密度脂蛋白	3.14	mmol/l	健康人群:1.8-3.36;心脑血管疾病危险人群:<2.59	M	2016-03-09 10:20:27	部分凝血活酶时间	31.8	S	22-45	M	2016-03-09 16:21:12	*总胆固醇	6.52	mmol/l	3.6-5.17	H	2016-03-09 10:20:27	D二聚体	60	ng/ml	0-115	M	2016-03-09 16:21:12	*葡萄糖	5.41	mmol/l	3.89-6.11	M	2016-03-09 10:20:27	C反应蛋白	0.9	mg/l	0-8	M	2016-03-09 10:20:27	凝血酶原时间(PT)	17.6	S	42992	H	2016-03-09 16:21:12
247	1000101703002	凝血酶原国际比值	0.87		0.7-1.3	M	2015-07-15 09:20:00	低密度脂蛋白	3.11	mmol/l	健康人群:1.8-3.36;心脑血管疾病危险人群:<2.59	M	2015-07-15 09:35:21	部分凝血活酶时间	29.6	S	22-45	M	2015-07-15 09:17:39	*总胆固醇	4.8	mmol/l	3.6-5.17	M	2015-07-15 09:35:21	D二聚体	205	ng/ml	0-115	H	2015-07-15 09:09:31	*葡萄糖	5.13	mmol/l	3.89-6.11	M	2015-07-15 09:35:21	C反应蛋白	3.45	mg/l	0-8	M	2015-07-21 11:47:30	凝血酶原时间(PT)	11.5	S	43023	M	2015-07-15 09:20:00
248	1000102733002	凝血酶原国际比值	1.07		0.7-1.3	M	2016-10-04 13:13:03	低密度脂蛋白	2.09	mmol/l	健康人群:1.8-3.36;心脑血管疾病危险人群:<2.59	M	2016-10-04 13:29:19	部分凝血活酶时间	22.9	S	20-40	M	2016-10-04 13:13:03	*总胆固醇	4.5	mmol/l	3.6-5.17	M	2016-10-04 13:29:19	D二聚体	710	ng/ml	0-115	H	2016-10-04 13:13:03	*葡萄糖	4.7	mmol/l	3.89-6.11	M	2016-10-04 13:29:19	C反应蛋白	6	mg/l	0-8	M	2016-10-04 13:29:19	凝血酶原时间(PT)	12.3	S	42992	M	2016-10-04 13:13:03
249	1000103220002	凝血酶原国际比值	0.88		0.7-1.3	M	2015-01-26 11:41:45	低密度脂蛋白	2.16	mmol/l	健康人群:1.8-3.36;心脑血管疾病危险人群:<2.59	M	2015-01-26 12:00:18	部分凝血活酶时间	30.5	S	22-45	M	2015-01-26 11:41:45	*总胆固醇	4.23	mmol/l	3.6-5.17	M	2015-01-26 12:00:18	D二聚体	89	ng/ml	0-115	M	2015-01-26 11:41:45	*葡萄糖	5.08	mmol/l	3.89-6.11	M	2015-01-26 12:00:18	C反应蛋白	2.1	mg/l	0-8	M	2015-01-26 12:14:10	凝血酶原时间(PT)	10.1	S	42992	M	2015-01-26 11:41:45
250	1000103656006	凝血酶原国际比值	0.94		0.7-1.3	M	2015-04-03 09:00:55	低密度脂蛋白	1.83	mmol/l	健康人群:1.8-3.36;心脑血管疾病危险人群:<2.59	M	2015-04-03 10:05:20	部分凝血活酶时间	31.2	S	22-45	M	2015-04-03 09:17:54	*总胆固醇	3.17	mmol/l	3.6-5.17	L	2015-04-03 10:05:20	D二聚体	182	ng/ml	0-115	H	2015-04-03 09:08:31	*葡萄糖	5.08	mmol/l	3.89-6.11	M	2015-04-03 10:05:20	C反应蛋白	1.5	mg/l	0-8	M	2015-04-03 10:05:20	凝血酶原时间(PT)	12.3	S	43023	M	2015-04-03 09:00:55
251	1000104507002	凝血酶原国际比值	0.91		0.7-1.3	M	2014-12-16 10:40:22	低密度脂蛋白	5.03	mmol/l	健康人群:1.8-3.36;心脑血管疾病危险人群:<2.59	M	2014-12-16 09:02:14	部分凝血活酶时间	34.7	S	22-45	M	2014-12-16 10:36:15	*总胆固醇	7.61	mmol/l	3.6-5.17	H	2014-12-16 09:02:14	D二聚体	91	ng/ml	0-115	M	2014-12-16 09:58:05	*葡萄糖	5.75	mmol/l	3.89-6.11	M	2014-12-16 09:02:14	C反应蛋白	0.44	mg/l	0-8	M	2014-12-16 09:02:14	凝血酶原时间(PT)	12	S	43023	M	2014-12-16 10:40:22
252	1000104812002	凝血酶原国际比值	0.88		0.7-1.3	M	2015-11-30 12:00:54	低密度脂蛋白	2.82	mmol/l	健康人群:1.8-3.36;心脑血管疾病危险人群:<2.59	M	2015-11-30 13:30:44	部分凝血活酶时间	27.6	S	22-45	M	2015-11-30 12:00:54	*总胆固醇	4.7	mmol/l	3.6-5.17	M	2015-11-30 13:30:44	D二聚体	350	ng/ml	0-115	H	2015-11-30 12:00:54	*葡萄糖	5.5	mmol/l	3.89-6.11	M	2015-11-30 13:30:44	C反应蛋白	0.3	mg/l	0-8	M	2015-11-30 13:34:44	凝血酶原时间(PT)	10.1	S	42992	M	2015-11-30 12:00:54
253	1000104817004	凝血酶原国际比值	1.03		0.7-1.3	M	2015-07-17 11:50:04	低密度脂蛋白	2.86	mmol/l	健康人群:1.8-3.36;心脑血管疾病危险人群:<2.59	M	2015-07-17 11:44:56	部分凝血活酶时间	30.1	S	22-45	M	2015-07-17 11:50:04	*总胆固醇	4.98	mmol/l	3.6-5.17	M	2015-07-17 11:44:56	D二聚体	1530	ng/ml	0-115	H	2015-07-17 11:50:04	*葡萄糖	6.8	mmol/l	3.89-6.11	H	2015-07-17 11:44:56	C反应蛋白	19.77	mg/l	0-8	H	2015-07-17 11:44:56	凝血酶原时间(PT)	11.8	S	42992	M	2015-07-17 11:50:04
254	1000105149004	凝血酶原国际比值	0.93		0.7-1.3	M	2016-04-08 11:20:15	低密度脂蛋白	3.43	mmol/l	健康人群:1.8-3.36;心脑血管疾病危险人群:<2.59	M	2016-04-08 10:45:04	部分凝血活酶时间	22	S	22-45	M	2016-04-08 11:20:15	*总胆固醇	6.47	mmol/l	3.6-5.17	H	2016-04-08 10:45:04	D二聚体	1260	ng/ml	0-115	H	2016-04-08 11:20:15	*葡萄糖	5.03	mmol/l	3.89-6.11	M	2016-04-08 10:45:04	C反应蛋白	8.2	mg/l	0-8	H	2016-04-08 10:38:36	凝血酶原时间(PT)	10.7	S	42992	M	2016-04-08 11:20:15
255	1000105302002	凝血酶原国际比值	0.9		0.7-1.3	M	2015-11-05 14:19:30	低密度脂蛋白	1.4	mmol/l	健康人群:1.8-3.36;心脑血管疾病危险人群:<2.59	M	2015-11-05 14:30:54	部分凝血活酶时间	41.3	S	22-45	M	2015-11-05 14:19:30	*总胆固醇	3.2	mmol/l	3.6-5.17	L	2015-11-05 14:30:54	D二聚体	2630	ng/ml	0-115	H	2015-11-05 14:19:30	*葡萄糖	14.8	mmol/l	3.89-6.11	H	2015-11-05 14:30:54	C反应蛋白	84.5	mg/l	0-8	H	2015-11-05 14:30:54	凝血酶原时间(PT)	10.4	S	42992	M	2015-11-05 14:19:30
256	1000107030005	凝血酶原国际比值	0.85		0.7-1.3	M	2015-06-03 09:55:32	低密度脂蛋白	3.17	mmol/l	健康人群:1.8-3.36;心脑血管疾病危险人群:<2.59	M	2015-06-03 10:30:23	部分凝血活酶时间	28.9	S	22-45	M	2015-06-03 09:55:32	*总胆固醇	5.66	mmol/l	3.6-5.17	H	2015-06-03 10:30:23	D二聚体	1560	ng/ml	0-115	H	2015-06-03 09:55:32	*葡萄糖	9.43	mmol/l	3.89-6.11	H	2015-06-03 10:30:23	C反应蛋白	37.6	mg/l	0-8	H	2015-06-03 11:01:30	凝血酶原时间(PT)	9.8	S	42992	M	2015-06-03 09:55:32
257	1000109079002	凝血酶原国际比值	1.12		0.7-1.3	M	2016-11-23 09:54:50	低密度脂蛋白	2.96	mmol/l	健康人群:1.8-3.36;心脑血管疾病危险人群:<2.59	M	2016-11-23 09:36:29	部分凝血活酶时间	27.5	S	20-40	M	2016-11-23 09:54:50	*总胆固醇	5	mmol/l	3.6-5.17	M	2016-11-23 09:36:29	D二聚体	2729	ng/ml	0-115	H	2016-11-23 11:33:53	*葡萄糖	4.42	mmol/l	3.89-6.11	M	2016-11-23 09:36:29	C反应蛋白	9.23	mg/l	0-8	H	2016-11-23 09:36:29	凝血酶原时间(PT)	12.9	S	42992	M	2016-11-23 09:54:50
258	1000109157004	凝血酶原国际比值	1.09		0.7-1.3	M	2015-06-05 10:59:03	低密度脂蛋白	1.31	mmol/l	健康人群:1.8-3.36;心脑血管疾病危险人群:<2.59	M	2015-06-05 10:49:51	部分凝血活酶时间	33.9	S	22-45	M	2015-06-05 10:59:03	*总胆固醇	2.41	mmol/l	3.6-5.17	L	2015-06-05 10:49:51	D二聚体	660	ng/ml	0-115	H	2015-06-05 10:59:03	*葡萄糖	7.43	mmol/l	3.89-6.11	H	2015-06-05 10:49:51	C反应蛋白	68.68	mg/l	0-8	H	2015-06-05 10:49:51	凝血酶原时间(PT)	12.6	S	42992	M	2015-06-05 10:59:03
259	1000109555006	凝血酶原国际比值	1.1		0.7-1.3	M	2017-02-27 15:36:43	低密度脂蛋白	2.01	mmol/l	健康人群:1.8-3.36;心脑血管疾病危险人群:<2.59	M	2017-02-27 15:03:35	部分凝血活酶时间	31.4	S	25-45	M	2017-02-27 15:31:45	*总胆固醇	3.7	mmol/l	3.6-5.17	M	2017-02-27 15:03:35	D二聚体	527	ng/ml	0-115	H	2017-02-27 15:28:23	*葡萄糖	5.2	mmol/l	3.89-6.11	M	2017-02-27 15:03:35	C反应蛋白	3.3	mg/l	0-8	M	2017-02-27 15:03:35	凝血酶原时间(PT)	13.6	S	43023	M	2017-02-27 15:36:43
260	1000109864003	凝血酶原国际比值	1.03		0.7-1.3	M	2014-08-26 09:52:05	低密度脂蛋白	2.29	mmol/l	健康人群:1.8-3.36;心脑血管疾病危险人群:<2.59	M	2014-08-26 09:22:46	部分凝血活酶时间	21.9	S	22-45	L	2014-08-26 11:34:45	*总胆固醇	4.61	mmol/l	3.6-5.17	M	2014-08-26 09:22:46	D二聚体	100	ng/ml	0-115	M	2014-08-26 09:52:05	*葡萄糖	5.15	mmol/l	3.89-6.11	M	2014-08-26 09:22:46	C反应蛋白	0.67	mg/l	0-8	M	2014-08-26 09:07:38	凝血酶原时间(PT)	11.9	S	42992	M	2014-08-26 09:52:05
261	1000111158002	凝血酶原国际比值	1.04		0.7-1.3	M	2016-11-07 11:12:58	低密度脂蛋白	2.35	mmol/l	健康人群:1.8-3.36;心脑血管疾病危险人群:<2.59	M	2016-11-07 11:23:47	部分凝血活酶时间	29.9	S	20-40	M	2016-11-07 11:12:58	*总胆固醇	3.87	mmol/l	3.6-5.17	M	2016-11-07 11:23:47	D二聚体	90	ng/ml	0-115	M	2016-11-07 11:12:58	*葡萄糖	4.82	mmol/l	3.89-6.11	M	2016-11-07 11:23:47	C反应蛋白	0.42	mg/l	0-8	M	2016-11-07 11:23:47	凝血酶原时间(PT)	11.9	S	42992	M	2016-11-07 11:12:58
262	1000111270002	凝血酶原国际比值	0.9		0.7-1.3	M	2015-04-25 09:39:33	低密度脂蛋白	2.6	mmol/l	健康人群:1.8-3.36;心脑血管疾病危险人群:<2.59	M	2015-04-25 09:46:35	部分凝血活酶时间	24.8	S	22-45	M	2015-04-25 09:39:33	*总胆固醇	4.76	mmol/l	3.6-5.17	M	2015-04-25 09:46:35	D二聚体	730	ng/ml	0-115	H	2015-04-25 09:39:33	*葡萄糖	4.8	mmol/l	3.89-6.11	M	2015-04-25 09:46:35	C反应蛋白	1.94	mg/l	0-8	M	2015-04-25 08:59:43	凝血酶原时间(PT)	10.3	S	42992	M	2015-04-25 09:39:33
263	1000111350010	凝血酶原国际比值	1.06		0.7-1.3	M	2016-09-05 09:51:59	低密度脂蛋白	0.85	mmol/l	健康人群:1.8-3.36;心脑血管疾病危险人群:<2.59	M	2016-08-25 20:22:35	部分凝血活酶时间	30.8	S	20-40	M	2016-09-05 09:51:59	*总胆固醇	2.6	mmol/l	3.6-5.17	L	2016-08-25 20:22:35	D二聚体	160	ng/ml	0-115	H	2016-09-05 09:51:59	*葡萄糖	11.7	mmol/l	3.89-6.11	H	2016-08-25 20:22:35	C反应蛋白	0.86	mg/l	0-8	M	2016-09-20 09:24:09	凝血酶原时间(PT)	12.2	S	42992	M	2016-09-05 09:51:59
264	1000113414002	凝血酶原国际比值	0.93		0.7-1.3	M	2016-02-29 11:36:56	低密度脂蛋白	3.08	mmol/l	健康人群:1.8-3.36;心脑血管疾病危险人群:<2.59	M	2016-02-29 11:49:36	部分凝血活酶时间	25.7	S	22-45	M	2016-02-29 11:36:56	*总胆固醇	5.79	mmol/l	3.6-5.17	H	2016-02-29 11:49:36	D二聚体	50	ng/ml	0-115	M	2016-02-29 11:36:56	*葡萄糖	6.05	mmol/l	3.89-6.11	M	2016-02-29 11:49:36	C反应蛋白	2.02	mg/l	0-8	M	2016-02-29 11:49:36	凝血酶原时间(PT)	10.7	S	42992	M	2016-02-29 11:36:56
265	1000113548004	凝血酶原国际比值	0.9		0.7-1.3	M	2015-01-16 16:49:13	低密度脂蛋白	4.82	mmol/l	健康人群:1.8-3.36;心脑血管疾病危险人群:<2.59	M	2015-01-16 16:03:07	部分凝血活酶时间	36.4	S	22-45	M	2015-01-16 16:42:25	*总胆固醇	8.24	mmol/l	3.6-5.17	H	2015-01-16 16:03:07	D二聚体	123	ng/ml	0-115	H	2015-01-16 16:42:25	*葡萄糖	5.08	mmol/l	3.89-6.11	M	2015-01-16 16:03:07	C反应蛋白	0.4	mg/l	0-8	M	2015-01-16 16:03:07	凝血酶原时间(PT)	11.8	S	43023	M	2015-01-16 16:49:13
266	1000114686002	凝血酶原国际比值	0.95		0.7-1.3	M	2016-10-22 10:01:38	低密度脂蛋白	2.38	mmol/l	健康人群:1.8-3.36;心脑血管疾病危险人群:<2.59	M	2016-10-22 10:19:26	部分凝血活酶时间	26.1	S	20-40	M	2016-10-22 10:01:38	*总胆固醇	4.95	mmol/l	3.6-5.17	M	2016-10-22 10:19:26	D二聚体	160	ng/ml	0-115	H	2016-10-22 10:01:38	*葡萄糖	5.55	mmol/l	3.89-6.11	M	2016-10-22 10:19:26	C反应蛋白	0.39	mg/l	0-8	M	2016-10-22 10:51:49	凝血酶原时间(PT)	10.9	S	42992	M	2016-10-22 10:01:38
267	1000114690005	凝血酶原国际比值	1		0.7-1.3	M	2017-01-04 11:01:16	低密度脂蛋白	2.6	mmol/l	健康人群:1.8-3.36;心脑血管疾病危险人群:<2.59	M	2017-01-04 10:38:58	部分凝血活酶时间	23.4	S	20-40	M	2017-01-04 11:01:16	*总胆固醇	5.4	mmol/l	3.6-5.17	H	2017-01-04 10:38:58	D二聚体	200	ng/ml	0-115	H	2017-01-04 11:01:16	*葡萄糖	5.6	mmol/l	3.89-6.11	M	2017-01-04 10:38:58	C反应蛋白	1	mg/l	0-8	M	2017-01-04 10:20:48	凝血酶原时间(PT)	11.5	S	42992	M	2017-01-04 11:01:16
268	1000114690006	凝血酶原国际比值	1.04		0.7-1.3	M	2017-02-04 09:36:59	低密度脂蛋白	2.53	mmol/l	健康人群:1.8-3.36;心脑血管疾病危险人群:<2.59	M	2017-02-04 09:18:49	部分凝血活酶时间	26.6	S	20-40	M	2017-02-04 09:36:59	*总胆固醇	4.58	mmol/l	3.6-5.17	M	2017-02-04 09:18:49	D二聚体	220	ng/ml	0-115	H	2017-02-04 09:36:59	*葡萄糖	4.64	mmol/l	3.89-6.11	M	2017-02-04 09:18:49	C反应蛋白	3.25	mg/l	0-8	M	2017-02-19 10:09:02	凝血酶原时间(PT)	12	S	42992	M	2017-02-04 09:36:59
269	1000115374003	凝血酶原国际比值	1.02		0.7-1.3	M	2017-02-15 10:15:59	低密度脂蛋白	1.87	mmol/l	健康人群:1.8-3.36;心脑血管疾病危险人群:<2.59	M	2017-02-15 10:11:17	部分凝血活酶时间	29.3	S	20-40	M	2017-02-15 10:15:59	*总胆固醇	4.68	mmol/l	3.6-5.17	M	2017-02-15 10:11:17	D二聚体	4480	ng/ml	0-115	H	2017-02-15 11:42:15	*葡萄糖	5.34	mmol/l	3.89-6.11	M	2017-02-15 10:11:17	C反应蛋白	7.93	mg/l	0-8	M	2017-02-15 10:11:17	凝血酶原时间(PT)	11.7	S	42992	M	2017-02-15 10:15:59
270	1000115387002	凝血酶原国际比值	0.92		0.7-1.3	M	2015-08-11 11:20:18	低密度脂蛋白	1.75	mmol/l	健康人群:1.8-3.36;心脑血管疾病危险人群:<2.59	M	2015-08-11 09:48:42	部分凝血活酶时间	41.5	S	22-45	M	2015-08-11 11:24:00	*总胆固醇	3.62	mmol/l	3.6-5.17	M	2015-08-11 09:48:42	D二聚体	81	ng/ml	0-115	M	2015-08-11 10:30:43	*葡萄糖	5.89	mmol/l	3.89-6.11	M	2015-08-11 09:48:42	C反应蛋白	38.71	mg/l	0-8	H	2015-08-11 09:48:42	凝血酶原时间(PT)	12.1	S	43023	M	2015-08-11 11:20:18
271	1000115920005	凝血酶原国际比值	0.89		0.7-1.3	M	2015-05-09 10:00:07	低密度脂蛋白	2.71	mmol/l	健康人群:1.8-3.36;心脑血管疾病危险人群:<2.59	M	2015-05-09 09:11:06	部分凝血活酶时间	23.9	S	22-45	M	2015-05-09 11:16:06	*总胆固醇	5.31	mmol/l	3.6-5.17	H	2015-05-09 09:11:06	D二聚体	20	ng/ml	0-115	M	2015-05-09 10:00:07	*葡萄糖	5.23	mmol/l	3.89-6.11	M	2015-05-09 09:11:06	C反应蛋白	4.2	mg/l	0-8	M	2015-05-11 10:10:04	凝血酶原时间(PT)	10.2	S	42992	M	2015-05-09 10:00:07
272	1000115938003	凝血酶原国际比值	0.98		0.7-1.3	M	2015-01-07 11:09:57	低密度脂蛋白	2.92	mmol/l	健康人群:1.8-3.36;心脑血管疾病危险人群:<2.59	M	2015-01-07 11:02:29	部分凝血活酶时间	28.1	S	22-45	M	2015-01-07 11:09:57	*总胆固醇	4.5	mmol/l	3.6-5.17	M	2015-01-07 11:02:29	D二聚体	330	ng/ml	0-115	H	2015-01-07 11:09:57	*葡萄糖	6.84	mmol/l	3.89-6.11	H	2015-01-07 11:02:29	C反应蛋白	124	mg/l	0-8	H	2015-01-07 11:02:29	凝血酶原时间(PT)	11.3	S	42992	M	2015-01-07 11:09:57
273	1000116014010	凝血酶原国际比值	1.58		0.7-1.3	H	2017-04-03 10:39:28	低密度脂蛋白	1.72	mmol/l	健康人群:1.8-3.36;心脑血管疾病危险人群:<2.59	M	2017-04-03 09:57:38	部分凝血活酶时间	42.4	S	20-40	H	2017-04-03 11:14:42	*总胆固醇	3.28	mmol/l	3.6-5.17	L	2017-04-03 09:57:38	D二聚体	950	ng/ml	0-115	H	2017-04-03 10:39:28	*葡萄糖	5.76	mmol/l	3.89-6.11	M	2017-04-03 09:57:38	C反应蛋白	62.78	mg/l	0-8	H	2017-04-03 10:56:05	凝血酶原时间(PT)	18.4	S	42992	H	2017-04-03 10:39:28
274	1000116053002	凝血酶原国际比值	1.22		0.7-1.3	M	2017-03-23 11:00:52	低密度脂蛋白	4.87	mmol/l	健康人群:1.8-3.36;心脑血管疾病危险人群:<2.59	M	2017-03-23 12:33:05	部分凝血活酶时间	42.7	S	25-45	M	2017-03-23 11:01:37	*总胆固醇	6.8	mmol/l	3.6-5.17	H	2017-03-23 12:33:05	D二聚体	127	ng/ml	0-115	H	2017-03-23 10:53:12	*葡萄糖	8.3	mmol/l	3.89-6.11	H	2017-03-23 12:33:05	C反应蛋白	1.5	mg/l	0-8	M	2017-03-23 12:33:06	凝血酶原时间(PT)	15	S	43023	M	2017-03-23 11:23:53
275	1000116267002	凝血酶原国际比值	0.98		0.7-1.3	M	2016-11-12 10:45:34	低密度脂蛋白	1.02	mmol/l	健康人群:1.8-3.36;心脑血管疾病危险人群:<2.59	M	2016-11-12 10:11:08	部分凝血活酶时间	30.3	S	20-40	M	2016-11-12 10:45:34	*总胆固醇	2.65	mmol/l	3.6-5.17	L	2016-11-12 10:11:08	D二聚体	2180	ng/ml	0-115	H	2016-11-12 10:45:34	*葡萄糖	4.62	mmol/l	3.89-6.11	M	2016-11-12 10:11:08	C反应蛋白	11.6	mg/l	0-8	H	2016-11-12 10:11:08	凝血酶原时间(PT)	11.3	S	42992	M	2016-11-12 10:45:34
276	1000117107002	凝血酶原国际比值	1.11		0.7-1.3	M	2016-10-09 10:03:20	低密度脂蛋白	1.41	mmol/l	健康人群:1.8-3.36;心脑血管疾病危险人群:<2.59	M	2016-10-09 09:44:21	部分凝血活酶时间	26.3	S	20-40	M	2016-10-09 10:03:20	*总胆固醇	3.09	mmol/l	3.6-5.17	L	2016-10-09 09:44:21	D二聚体	1180	ng/ml	0-115	H	2016-10-09 11:00:00	*葡萄糖	8.18	mmol/l	3.89-6.11	H	2016-10-09 09:44:21	C反应蛋白	47.2	mg/l	0-8	H	2016-10-09 09:44:21	凝血酶原时间(PT)	12.7	S	42992	M	2016-10-09 10:03:20
277	1000118025002	凝血酶原国际比值	0.99		0.7-1.3	M	2015-07-16 10:40:37	低密度脂蛋白	2.94	mmol/l	健康人群:1.8-3.36;心脑血管疾病危险人群:<2.59	M	2015-07-16 09:31:23	部分凝血活酶时间	30.9	S	22-45	M	2015-07-16 10:40:37	*总胆固醇	4.82	mmol/l	3.6-5.17	M	2015-07-16 09:31:23	D二聚体	140	ng/ml	0-115	H	2015-07-16 10:40:37	*葡萄糖	5.97	mmol/l	3.89-6.11	M	2015-07-16 09:31:23	C反应蛋白	3.92	mg/l	0-8	M	2015-07-16 09:31:23	凝血酶原时间(PT)	11.4	S	42992	M	2015-07-16 10:40:37
278	1000118633002	凝血酶原国际比值	1.07		0.7-1.3	M	2017-03-14 13:33:15	低密度脂蛋白	2.88	mmol/l	健康人群:1.8-3.36;心脑血管疾病危险人群:<2.59	M	2017-03-14 14:04:24	部分凝血活酶时间	34.7	S	25-45	M	2017-03-14 13:40:11	*总胆固醇	4.4	mmol/l	3.6-5.17	M	2017-03-14 14:04:24	D二聚体	31	ng/ml	0-115	M	2017-03-14 13:39:01	*葡萄糖	5.9	mmol/l	3.89-6.11	M	2017-03-14 14:04:24	C反应蛋白	0.7	mg/l	0-8	M	2017-03-14 14:04:25	凝血酶原时间(PT)	13.3	S	43023	M	2017-03-14 13:33:15
279	1000119205002	凝血酶原国际比值	0.94		0.7-1.3	M	2015-11-26 11:37:06	低密度脂蛋白	2.68	mmol/l	健康人群:1.8-3.36;心脑血管疾病危险人群:<2.59	M	2015-11-26 12:23:21	部分凝血活酶时间	35.2	S	22-45	M	2015-11-26 11:31:33	*总胆固醇	5.15	mmol/l	3.6-5.17	M	2015-11-26 12:23:21	D二聚体	45	ng/ml	0-115	M	2015-11-26 11:21:07	*葡萄糖	5.53	mmol/l	3.89-6.11	M	2015-11-26 12:23:21	C反应蛋白	0.06	mg/l	0-8	M	2015-11-26 12:23:21	凝血酶原时间(PT)	12	S	43023	M	2015-11-26 11:36:25
280	1000119668002	凝血酶原国际比值	1.01		0.7-1.3	M	2017-01-23 10:55:53	低密度脂蛋白	1.32	mmol/l	健康人群:1.8-3.36;心脑血管疾病危险人群:<2.59	M	2017-01-23 09:13:03	部分凝血活酶时间	35.1	S	25-45	M	2017-01-23 10:44:10	*总胆固醇	3.76	mmol/l	3.6-5.17	M	2017-01-23 09:13:03	D二聚体	597	ng/ml	0-115	H	2017-01-23 10:11:47	*葡萄糖	6.08	mmol/l	3.89-6.11	M	2017-01-23 09:13:03	C反应蛋白	45.25	mg/l	0-8	H	2017-01-23 09:13:03	凝血酶原时间(PT)	12.5	S	43023	M	2017-01-23 10:55:53
281	1000120093002	凝血酶原国际比值	0.85		0.7-1.3	M	2015-05-26 11:23:40	低密度脂蛋白	3.03	mmol/l	健康人群:1.8-3.36;心脑血管疾病危险人群:<2.59	M	2015-05-26 11:12:39	部分凝血活酶时间	31.2	S	22-45	M	2015-05-26 11:23:40	*总胆固醇	5.81	mmol/l	3.6-5.17	H	2015-05-26 11:12:39	D二聚体	89	ng/ml	0-115	M	2015-05-26 11:23:40	*葡萄糖	5	mmol/l	3.89-6.11	M	2015-05-26 11:12:39	C反应蛋白	1.29	mg/l	0-8	M	2015-05-26 11:30:45	凝血酶原时间(PT)	9.8	S	42992	M	2015-05-26 11:23:40
282	1000120099002	凝血酶原国际比值	0.89		0.7-1.3	M	2015-04-14 12:03:43	低密度脂蛋白	4.58	mmol/l	健康人群:1.8-3.36;心脑血管疾病危险人群:<2.59	M	2015-04-14 11:52:19	部分凝血活酶时间	30.3	S	22-45	M	2015-04-14 11:48:04	*总胆固醇	7.14	mmol/l	3.6-5.17	H	2015-04-14 11:52:19	D二聚体	35	ng/ml	0-115	M	2015-04-14 11:41:07	*葡萄糖	5.02	mmol/l	3.89-6.11	M	2015-04-14 11:52:19	C反应蛋白	39.65	mg/l	0-8	H	2015-04-17 10:50:27	凝血酶原时间(PT)	11.7	S	43023	M	2015-04-14 12:03:43
283	1000120850002	凝血酶原国际比值	1.07		0.7-1.3	M	2017-01-30 10:17:04	低密度脂蛋白	1.55	mmol/l	健康人群:1.8-3.36;心脑血管疾病危险人群:<2.59	M	2017-01-30 09:49:03	部分凝血活酶时间	32.7	S	20-40	M	2017-01-30 10:17:04	*总胆固醇	3.08	mmol/l	3.6-5.17	L	2017-01-30 09:49:03	D二聚体	2320	ng/ml	0-115	H	2017-01-30 10:17:04	*葡萄糖	5.65	mmol/l	3.89-6.11	M	2017-01-30 09:49:03	C反应蛋白	74.76	mg/l	0-8	H	2017-02-09 08:52:24	凝血酶原时间(PT)	12.3	S	42992	M	2017-01-30 10:17:04
284	1000121802002	凝血酶原国际比值	0.92		0.7-1.3	M	2015-07-09 10:38:23	低密度脂蛋白	2.45	mmol/l	健康人群:1.8-3.36;心脑血管疾病危险人群:<2.59	M	2015-07-09 10:58:10	部分凝血活酶时间	36.7	S	22-45	M	2015-07-09 10:34:36	*总胆固醇	4.3	mmol/l	3.6-5.17	M	2015-07-09 10:58:10	D二聚体	224	ng/ml	0-115	H	2015-07-09 10:20:31	*葡萄糖	4.89	mmol/l	3.89-6.11	M	2015-07-09 10:58:10	C反应蛋白	1.51	mg/l	0-8	M	2015-07-09 10:58:10	凝血酶原时间(PT)	12.1	S	43023	M	2015-07-09 10:38:23
285	1000121906002	凝血酶原国际比值	0.91		0.7-1.3	M	2015-01-23 09:05:02	低密度脂蛋白	2.19	mmol/l	健康人群:1.8-3.36;心脑血管疾病危险人群:<2.59	M	2015-01-23 09:27:41	部分凝血活酶时间	26.9	S	22-45	M	2015-01-23 09:05:02	*总胆固醇	3.95	mmol/l	3.6-5.17	M	2015-01-23 09:27:41	D二聚体	120	ng/ml	0-115	H	2015-01-23 10:49:18	*葡萄糖	7.35	mmol/l	3.89-6.11	H	2015-01-23 09:27:41	C反应蛋白	3.61	mg/l	0-8	M	2015-01-23 09:27:41	凝血酶原时间(PT)	10.4	S	42992	M	2015-01-23 09:05:02
286	1000123264011	凝血酶原国际比值	1.03		0.7-1.3	M	2016-08-26 09:49:53	低密度脂蛋白	1.2	mmol/l	健康人群:1.8-3.36;心脑血管疾病危险人群:<2.59	M	2016-08-26 09:42:43	部分凝血活酶时间	32.5	S	20-40	M	2016-08-26 09:49:53	*总胆固醇	2.76	mmol/l	3.6-5.17	L	2016-08-26 09:42:43	D二聚体	7850	ng/ml	0-115	H	2016-08-26 09:49:53	*葡萄糖	4.88	mmol/l	3.89-6.11	M	2016-08-26 09:42:43	C反应蛋白	88.91	mg/l	0-8	H	2016-08-30 09:41:10	凝血酶原时间(PT)	11.8	S	42992	M	2016-08-26 09:49:53
287	1000124103002	凝血酶原国际比值	0.94		0.7-1.3	M	2017-03-07 11:01:36	低密度脂蛋白	2.11	mmol/l	健康人群:1.8-3.36;心脑血管疾病危险人群:<2.59	M	2017-03-07 12:13:47	部分凝血活酶时间	29	S	20-40	M	2017-03-07 11:01:36	*总胆固醇	4.01	mmol/l	3.6-5.17	M	2017-03-07 12:13:47	D二聚体	1450	ng/ml	0-115	H	2017-03-07 11:01:36	*葡萄糖	4.93	mmol/l	3.89-6.11	M	2017-03-07 12:13:47	C反应蛋白	10.99	mg/l	0-8	H	2017-03-07 12:13:47	凝血酶原时间(PT)	10.8	S	42992	M	2017-03-07 11:01:36
288	1000124391003	凝血酶原国际比值	1.24		0.7-1.3	M	2016-12-20 11:16:56	低密度脂蛋白	0.79	mmol/l	健康人群:1.8-3.36;心脑血管疾病危险人群:<2.59	M	2016-12-20 09:23:58	部分凝血活酶时间	47.4	S	20-40	H	2016-12-20 12:32:40	*总胆固醇	1.7	mmol/l	3.6-5.17	L	2016-12-20 09:23:58	D二聚体	58	ng/ml	0-115	M	2016-12-20 12:27:25	*葡萄糖	4.1	mmol/l	3.89-6.11	M	2016-12-20 09:23:58	C反应蛋白	3.35	mg/l	0-8	M	2016-12-20 09:05:35	凝血酶原时间(PT)	14.3	S	42992	H	2016-12-20 11:16:56
289	1000125104002	凝血酶原国际比值	0.96		0.7-1.3	M	2016-01-06 09:57:31	低密度脂蛋白	2.16	mmol/l	健康人群:1.8-3.36;心脑血管疾病危险人群:<2.59	M	2016-01-06 09:37:44	部分凝血活酶时间	26.1	S	22-45	M	2016-01-06 09:57:31	*总胆固醇	4.61	mmol/l	3.6-5.17	M	2016-01-06 09:37:44	D二聚体	1590	ng/ml	0-115	H	2016-01-06 09:57:31	*葡萄糖	6.73	mmol/l	3.89-6.11	H	2016-01-06 09:37:44	C反应蛋白	6.26	mg/l	0-8	M	2016-01-06 09:42:08	凝血酶原时间(PT)	11.1	S	42992	M	2016-01-06 09:57:31
290	1000125254004	凝血酶原国际比值	1.01		0.7-1.3	M	2016-08-10 12:19:26	低密度脂蛋白	3.21	mmol/l	健康人群:1.8-3.36;心脑血管疾病危险人群:<2.59	M	2016-08-10 11:41:44	部分凝血活酶时间	29.5	S	20-40	M	2016-08-10 12:19:26	*总胆固醇	6.4	mmol/l	3.6-5.17	H	2016-08-10 11:41:44	D二聚体	60	ng/ml	0-115	M	2016-08-10 12:19:26	*葡萄糖	5.5	mmol/l	3.89-6.11	M	2016-08-10 11:41:44	C反应蛋白	1.9	mg/l	0-8	M	2016-08-10 11:41:44	凝血酶原时间(PT)	11.6	S	42992	M	2016-08-10 12:19:26
291	1000126087003	凝血酶原国际比值	1		0.7-1.3	M	2016-10-09 11:04:33	低密度脂蛋白	2.69	mmol/l	健康人群:1.8-3.36;心脑血管疾病危险人群:<2.59	M	2016-10-09 09:31:37	部分凝血活酶时间	26.4	S	20-40	M	2016-10-09 11:04:33	*总胆固醇	4.47	mmol/l	3.6-5.17	M	2016-10-09 09:31:37	D二聚体	1370	ng/ml	0-115	H	2016-10-09 10:51:03	*葡萄糖	6.12	mmol/l	3.89-6.11	H	2016-10-09 09:31:37	C反应蛋白	7.97	mg/l	0-8	M	2016-10-09 09:31:37	凝血酶原时间(PT)	11.5	S	42992	M	2016-10-09 11:04:33
292	1000127650002	凝血酶原国际比值	0.9		0.7-1.3	M	2015-03-24 11:12:13	低密度脂蛋白	2.77	mmol/l	健康人群:1.8-3.36;心脑血管疾病危险人群:<2.59	M	2015-03-24 11:58:02	部分凝血活酶时间	33	S	22-45	M	2015-03-24 11:07:21	*总胆固醇	4.94	mmol/l	3.6-5.17	M	2015-03-24 11:58:02	D二聚体	85	ng/ml	0-115	M	2015-03-24 11:17:18	*葡萄糖	5.73	mmol/l	3.89-6.11	M	2015-03-24 11:58:02	C反应蛋白	0.88	mg/l	0-8	M	2015-03-24 11:58:02	凝血酶原时间(PT)	11.9	S	43023	M	2015-03-24 11:12:13
293	1000127658002	凝血酶原国际比值	0.97		0.7-1.3	M	2015-07-30 10:33:19	低密度脂蛋白	2.38	mmol/l	健康人群:1.8-3.36;心脑血管疾病危险人群:<2.59	M	2015-07-30 09:03:08	部分凝血活酶时间	29.9	S	22-45	M	2015-07-30 10:33:19	*总胆固醇	4.94	mmol/l	3.6-5.17	M	2015-07-30 09:03:08	D二聚体	140	ng/ml	0-115	H	2015-07-30 10:33:19	*葡萄糖	5.03	mmol/l	3.89-6.11	M	2015-07-30 09:03:08	C反应蛋白	0.3	mg/l	0-8	M	2015-07-30 09:03:08	凝血酶原时间(PT)	11.2	S	42992	M	2015-07-30 10:33:19
294	1000127871002	凝血酶原国际比值	0.94		0.7-1.3	M	2015-01-14 10:38:19	低密度脂蛋白	4.11	mmol/l	健康人群:1.8-3.36;心脑血管疾病危险人群:<2.59	M	2015-01-14 11:20:07	部分凝血活酶时间	23.5	S	22-45	M	2015-01-14 10:38:19	*总胆固醇	6.05	mmol/l	3.6-5.17	H	2015-01-14 11:20:07	D二聚体	100	ng/ml	0-115	M	2015-01-14 10:38:19	*葡萄糖	5.73	mmol/l	3.89-6.11	M	2015-01-14 11:20:07	C反应蛋白	17.61	mg/l	0-8	H	2015-01-15 16:27:50	凝血酶原时间(PT)	10.8	S	42992	M	2015-01-14 10:38:19
295	1000129409002	凝血酶原国际比值	0.94		0.7-1.3	M	2015-08-13 10:10:14	低密度脂蛋白	2.36	mmol/l	健康人群:1.8-3.36;心脑血管疾病危险人群:<2.59	M	2015-08-13 10:00:35	部分凝血活酶时间	38.2	S	22-45	M	2015-08-13 09:57:45	*总胆固醇	3.94	mmol/l	3.6-5.17	M	2015-08-13 10:00:35	D二聚体	334	ng/ml	0-115	H	2015-08-13 09:32:19	*葡萄糖	9.58	mmol/l	3.89-6.11	H	2015-08-13 10:00:35	C反应蛋白	13.35	mg/l	0-8	H	2015-08-19 10:49:52	凝血酶原时间(PT)	12.3	S	43023	M	2015-08-13 10:10:14
296	1000129858002	凝血酶原国际比值	0.91		0.7-1.3	M	2017-02-05 09:57:35	低密度脂蛋白	1.68	mmol/l	健康人群:1.8-3.36;心脑血管疾病危险人群:<2.59	M	2017-02-05 09:48:38	部分凝血活酶时间	29.4	S	20-40	M	2017-02-05 09:57:35	*总胆固醇	3.7	mmol/l	3.6-5.17	M	2017-02-05 09:48:38	D二聚体	89	ng/ml	0-115	M	2017-02-05 09:57:35	*葡萄糖	4.5	mmol/l	3.89-6.11	M	2017-02-05 09:48:38	C反应蛋白	1	mg/l	0-8	M	2017-02-05 09:48:38	凝血酶原时间(PT)	10.5	S	42992	M	2017-02-05 09:57:35
297	1000130045002	凝血酶原国际比值	0.9		0.7-1.3	M	2016-05-03 11:35:20	低密度脂蛋白	3.32	mmol/l	健康人群:1.8-3.36;心脑血管疾病危险人群:<2.59	M	2016-05-03 11:21:34	部分凝血活酶时间	19.1	S	22-45	L	2016-05-03 11:35:20	*总胆固醇	5.89	mmol/l	3.6-5.17	H	2016-05-03 11:21:34	D二聚体	1360	ng/ml	0-115	H	2016-05-03 11:35:20	*葡萄糖	4.72	mmol/l	3.89-6.11	M	2016-05-03 11:21:34	C反应蛋白	0.42	mg/l	0-8	M	2016-05-03 11:21:34	凝血酶原时间(PT)	10.4	S	42992	M	2016-05-03 11:35:20
298	1000130302003	凝血酶原国际比值	0.9		0.7-1.3	M	2015-07-28 10:17:06	低密度脂蛋白	2.11	mmol/l	健康人群:1.8-3.36;心脑血管疾病危险人群:<2.59	M	2015-07-28 09:41:27	部分凝血活酶时间	32	S	22-45	M	2015-07-28 10:15:05	*总胆固醇	3.62	mmol/l	3.6-5.17	M	2015-07-28 09:41:27	D二聚体	621	ng/ml	0-115	H	2015-07-28 09:48:00	*葡萄糖	4.95	mmol/l	3.89-6.11	M	2015-07-28 09:41:27	C反应蛋白	22.31	mg/l	0-8	H	2015-07-28 09:41:27	凝血酶原时间(PT)	11.9	S	43023	M	2015-07-28 10:17:06
299	1000130388002	凝血酶原国际比值	1.02		0.7-1.3	M	2014-08-31 10:12:02	低密度脂蛋白	3.79	mmol/l	健康人群:1.8-3.36;心脑血管疾病危险人群:<2.59	M	2014-08-31 10:03:12	部分凝血活酶时间	19.3	S	22-45	L	2014-08-31 10:12:02	*总胆固醇	6.5	mmol/l	3.6-5.17	H	2014-08-31 10:03:12	D二聚体	8370	ng/ml	0-115	H	2014-08-31 10:12:02	*葡萄糖	6.7	mmol/l	3.89-6.11	H	2014-08-31 10:03:12	C反应蛋白	24.1	mg/l	0-8	H	2014-08-31 10:03:12	凝血酶原时间(PT)	11.7	S	42992	M	2014-08-31 10:12:02
300	1000131128005	凝血酶原国际比值	0.9		0.7-1.3	M	2014-11-28 11:24:49	低密度脂蛋白	1.97	mmol/l	健康人群:1.8-3.36;心脑血管疾病危险人群:<2.59	M	2014-11-18 09:11:16	部分凝血活酶时间	35.5	S	22-45	M	2014-11-28 11:08:29	*总胆固醇	3.75	mmol/l	3.6-5.17	M	2014-11-18 09:11:16	D二聚体	152	ng/ml	0-115	H	2014-11-28 11:13:01	*葡萄糖	4.98	mmol/l	3.89-6.11	M	2014-11-18 09:11:16	C反应蛋白	3.46	mg/l	0-8	M	2014-11-18 09:11:16	凝血酶原时间(PT)	11.9	S	43023	M	2014-11-28 11:24:49
301	1000131128006	凝血酶原国际比值	0.85		0.7-1.3	M	2015-08-04 11:10:54	低密度脂蛋白	2.89	mmol/l	健康人群:1.8-3.36;心脑血管疾病危险人群:<2.59	M	2015-08-04 09:14:25	部分凝血活酶时间	33.7	S	22-45	M	2015-08-04 11:02:22	*总胆固醇	4.9	mmol/l	3.6-5.17	M	2015-08-04 09:14:25	D二聚体	70	ng/ml	0-115	M	2015-08-04 10:00:03	*葡萄糖	4.31	mmol/l	3.89-6.11	M	2015-08-04 09:14:25	C反应蛋白	0.76	mg/l	0-8	M	2015-08-04 09:14:25	凝血酶原时间(PT)	11.2	S	43023	M	2015-08-04 11:10:54
302	1000131197002	凝血酶原国际比值	1.02		0.7-1.3	M	2016-03-25 11:11:51	低密度脂蛋白	5.16	mmol/l	健康人群:1.8-3.36;心脑血管疾病危险人群:<2.59	M	2016-03-25 08:55:31	部分凝血活酶时间	26.3	S	22-45	M	2016-03-25 11:11:51	*总胆固醇	8.25	mmol/l	3.6-5.17	H	2016-03-25 08:55:31	D二聚体	20	ng/ml	0-115	M	2016-03-25 11:11:51	*葡萄糖	5.59	mmol/l	3.89-6.11	M	2016-03-25 08:55:31	C反应蛋白	3.47	mg/l	0-8	M	2016-03-25 08:55:31	凝血酶原时间(PT)	11.7	S	42992	M	2016-03-25 11:11:51
303	1000131379002	凝血酶原国际比值	0.97		0.7-1.3	M	2017-04-05 11:58:57	低密度脂蛋白	2.01	mmol/l	健康人群:1.8-3.36;心脑血管疾病危险人群:<2.59	M	2017-04-05 11:57:28	部分凝血活酶时间	30.3	S	20-40	M	2017-04-05 11:58:57	*总胆固醇	4.29	mmol/l	3.6-5.17	M	2017-04-05 11:57:28	D二聚体	460	ng/ml	0-115	H	2017-04-05 11:58:57	*葡萄糖	5.43	mmol/l	3.89-6.11	M	2017-04-05 11:57:28	C反应蛋白	65.35	mg/l	0-8	H	2017-04-05 11:57:28	凝血酶原时间(PT)	11.2	S	42992	M	2017-04-05 11:58:57
304	1000131695002	凝血酶原国际比值	0.98		0.7-1.3	M	2016-06-28 11:21:40	低密度脂蛋白	2.51	mmol/l	健康人群:1.8-3.36;心脑血管疾病危险人群:<2.59	M	2016-06-28 10:16:39	部分凝血活酶时间	28	S	20-40	M	2016-06-28 11:21:40	*总胆固醇	4.43	mmol/l	3.6-5.17	M	2016-06-28 10:16:39	D二聚体	210	ng/ml	0-115	H	2016-06-28 11:21:40	*葡萄糖	9.61	mmol/l	3.89-6.11	H	2016-06-28 10:16:39	C反应蛋白	14.77	mg/l	0-8	H	2016-06-28 10:16:39	凝血酶原时间(PT)	11.3	S	42992	M	2016-06-28 11:21:40
305	1000131695003	凝血酶原国际比值	0.96		0.7-1.3	M	2017-03-23 11:18:20	低密度脂蛋白	3.32	mmol/l	健康人群:1.8-3.36;心脑血管疾病危险人群:<2.59	M	2017-03-23 12:38:45	部分凝血活酶时间	28.1	S	20-40	M	2017-03-23 11:18:20	*总胆固醇	4.7	mmol/l	3.6-5.17	M	2017-03-23 12:38:45	D二聚体	150	ng/ml	0-115	H	2017-03-23 11:18:20	*葡萄糖	10	mmol/l	3.89-6.11	H	2017-03-23 12:38:45	C反应蛋白	7.9	mg/l	0-8	M	2017-03-23 12:38:46	凝血酶原时间(PT)	11	S	42992	M	2017-03-23 11:18:20
306	1000131727002	凝血酶原国际比值	1		0.7-1.3	M	2014-11-04 09:35:38	低密度脂蛋白	2.06	mmol/l	健康人群:1.8-3.36;心脑血管疾病危险人群:<2.59	M	2014-11-04 09:31:58	部分凝血活酶时间	30.8	S	22-45	M	2014-11-04 09:35:38	*总胆固醇	3.41	mmol/l	3.6-5.17	L	2014-11-04 09:31:58	D二聚体	110	ng/ml	0-115	M	2014-11-04 11:29:10	*葡萄糖	5.06	mmol/l	3.89-6.11	M	2014-11-04 09:31:58	C反应蛋白	16.98	mg/l	0-8	H	2014-11-13 09:26:02	凝血酶原时间(PT)	11.5	S	42992	M	2014-11-04 09:35:38
307	1000132866003	凝血酶原国际比值	0.95		0.7-1.3	M	2015-02-03 12:54:56	低密度脂蛋白	2.27	mmol/l	健康人群:1.8-3.36;心脑血管疾病危险人群:<2.59	M	2015-02-03 13:06:41	部分凝血活酶时间	25.6	S	22-45	M	2015-02-03 12:54:56	*总胆固醇	4.7	mmol/l	3.6-5.17	M	2015-02-03 13:06:41	D二聚体	89	ng/ml	0-115	M	2015-02-03 12:54:56	*葡萄糖	5.2	mmol/l	3.89-6.11	M	2015-02-03 13:06:40	C反应蛋白	1.2	mg/l	0-8	M	2015-02-03 13:25:06	凝血酶原时间(PT)	10.9	S	42992	M	2015-02-03 12:54:56
308	1000133237002	凝血酶原国际比值	0.92		0.7-1.3	M	2015-10-14 09:03:11	低密度脂蛋白	2.57	mmol/l	健康人群:1.8-3.36;心脑血管疾病危险人群:<2.59	M	2015-10-14 09:24:45	部分凝血活酶时间	25.9	S	22-45	M	2015-10-14 09:03:11	*总胆固醇	5.11	mmol/l	3.6-5.17	M	2015-10-14 09:24:45	D二聚体	20	ng/ml	0-115	M	2015-10-14 09:03:11	*葡萄糖	4.66	mmol/l	3.89-6.11	M	2015-10-14 09:24:45	C反应蛋白	3.31	mg/l	0-8	M	2015-10-14 09:24:50	凝血酶原时间(PT)	10.6	S	42992	M	2015-10-14 09:03:11
309	1000133985002	凝血酶原国际比值	1.04		0.7-1.3	M	2016-03-29 09:28:17	低密度脂蛋白	2.2	mmol/l	健康人群:1.8-3.36;心脑血管疾病危险人群:<2.59	M	2016-03-29 09:35:02	部分凝血活酶时间	23	S	22-45	M	2016-03-29 09:28:17	*总胆固醇	4.49	mmol/l	3.6-5.17	M	2016-03-29 09:35:02	D二聚体	740	ng/ml	0-115	H	2016-03-29 09:28:17	*葡萄糖	5.71	mmol/l	3.89-6.11	M	2016-03-29 09:35:02	C反应蛋白	30.21	mg/l	0-8	H	2016-03-29 09:11:13	凝血酶原时间(PT)	12	S	42992	M	2016-03-29 09:28:17
310	1000134578002	凝血酶原国际比值	0.91		0.7-1.3	M	2014-09-24 11:38:02	低密度脂蛋白	3.13	mmol/l	健康人群:1.8-3.36;心脑血管疾病危险人群:<2.59	M	2014-09-24 09:42:59	部分凝血活酶时间	26.8	S	22-45	M	2014-09-24 11:50:13	*总胆固醇	5.49	mmol/l	3.6-5.17	H	2014-09-24 09:42:59	D二聚体	60	ng/ml	0-115	M	2014-09-24 11:38:02	*葡萄糖	4.79	mmol/l	3.89-6.11	M	2014-09-24 09:42:59	C反应蛋白	17.15	mg/l	0-8	H	2014-10-04 09:34:23	凝血酶原时间(PT)	10.5	S	42992	M	2014-09-24 11:38:02
311	1000135301002	凝血酶原国际比值	0.91		0.7-1.3	M	2015-05-19 09:32:18	低密度脂蛋白	1.8	mmol/l	健康人群:1.8-3.36;心脑血管疾病危险人群:<2.59	M	2015-05-19 10:33:19	部分凝血活酶时间	26.4	S	22-45	M	2015-05-19 09:32:18	*总胆固醇	3.87	mmol/l	3.6-5.17	M	2015-05-19 10:33:19	D二聚体	210	ng/ml	0-115	H	2015-05-19 09:32:18	*葡萄糖	4.85	mmol/l	3.89-6.11	M	2015-05-19 10:33:19	C反应蛋白	7.46	mg/l	0-8	M	2015-05-19 10:33:19	凝血酶原时间(PT)	10.5	S	42992	M	2015-05-19 09:32:18
312	1000135488005	凝血酶原国际比值	0.84		0.7-1.3	M	2015-10-29 11:11:44	低密度脂蛋白	2.63	mmol/l	健康人群:1.8-3.36;心脑血管疾病危险人群:<2.59	M	2015-10-29 08:51:36	部分凝血活酶时间	35.4	S	22-45	M	2015-10-29 11:24:37	*总胆固醇	4.87	mmol/l	3.6-5.17	M	2015-10-29 08:51:36	D二聚体	81	ng/ml	0-115	M	2015-10-29 10:33:03	*葡萄糖	6.47	mmol/l	3.89-6.11	H	2015-10-29 08:51:36	C反应蛋白	23.85	mg/l	0-8	H	2015-10-29 09:03:52	凝血酶原时间(PT)	11.1	S	43023	M	2015-10-29 11:11:44
313	1000135907002	凝血酶原国际比值	0.97		0.7-1.3	M	2015-02-27 12:13:52	低密度脂蛋白	1.41	mmol/l	健康人群:1.8-3.36;心脑血管疾病危险人群:<2.59	M	2015-02-27 12:44:23	部分凝血活酶时间	39.9	S	22-45	M	2015-02-27 12:05:39	*总胆固醇	4.1	mmol/l	3.6-5.17	M	2015-02-27 12:44:23	D二聚体	35	ng/ml	0-115	M	2015-02-27 12:03:28	*葡萄糖	6.2	mmol/l	3.89-6.11	H	2015-02-27 12:44:23	C反应蛋白	3.4	mg/l	0-8	M	2015-02-27 12:59:38	凝血酶原时间(PT)	12.7	S	43023	M	2015-02-27 12:13:52
314	1000138237004	凝血酶原国际比值	0.99		0.7-1.3	M	2016-09-01 08:57:57	低密度脂蛋白	3.11	mmol/l	健康人群:1.8-3.36;心脑血管疾病危险人群:<2.59	M	2016-09-01 09:22:39	部分凝血活酶时间	28.9	S	20-40	M	2016-09-01 08:43:33	*总胆固醇	6.2	mmol/l	3.6-5.17	H	2016-09-01 09:22:39	D二聚体	17	ng/ml	0-115	M	2016-09-01 08:50:27	*葡萄糖	8.23	mmol/l	3.89-6.11	H	2016-09-01 09:22:39	C反应蛋白	1.2	mg/l	0-8	M	2016-09-01 09:22:39	凝血酶原时间(PT)	12.3	S	43023	M	2016-09-01 08:57:57
315	1000139195002	凝血酶原国际比值	1.01		0.7-1.3	M	2016-06-24 10:14:27	低密度脂蛋白	2.55	mmol/l	健康人群:1.8-3.36;心脑血管疾病危险人群:<2.59	M	2016-06-24 09:13:15	部分凝血活酶时间	26.3	S	20-40	M	2016-06-24 10:14:27	*总胆固醇	4.66	mmol/l	3.6-5.17	M	2016-06-24 09:13:15	D二聚体	490	ng/ml	0-115	H	2016-06-24 10:14:27	*葡萄糖	12.43	mmol/l	3.89-6.11	H	2016-06-24 09:13:15	C反应蛋白	124.82	mg/l	0-8	H	2016-06-24 09:13:15	凝血酶原时间(PT)	11.6	S	42992	M	2016-06-24 10:14:27
316	1000140269004	凝血酶原国际比值	1.02		0.7-1.3	M	2017-03-22 10:01:45	低密度脂蛋白	1.42	mmol/l	健康人群:1.8-3.36;心脑血管疾病危险人群:<2.59	M	2017-03-22 10:22:28	部分凝血活酶时间	24.8	S	20-40	M	2017-03-22 10:01:45	*总胆固醇	3.18	mmol/l	3.6-5.17	L	2017-03-22 10:22:28	D二聚体	11140	ng/ml	0-115	H	2017-03-22 10:01:45	*葡萄糖	5.95	mmol/l	3.89-6.11	M	2017-03-22 10:22:28	C反应蛋白	80.5	mg/l	0-8	H	2017-03-25 10:01:20	凝血酶原时间(PT)	11.7	S	42992	M	2017-03-22 10:01:45
317	1000140665005	凝血酶原国际比值	1.21		0.7-1.3	M	2016-11-29 10:52:38	低密度脂蛋白	3.09	mmol/l	健康人群:1.8-3.36;心脑血管疾病危险人群:<2.59	M	2016-11-29 10:53:10	部分凝血活酶时间	24.5	S	20-40	M	2016-11-29 10:52:38	*总胆固醇	5.28	mmol/l	3.6-5.17	H	2016-11-29 10:53:10	D二聚体	710	ng/ml	0-115	H	2016-11-29 10:52:38	*葡萄糖	4.66	mmol/l	3.89-6.11	M	2016-11-29 10:53:10	C反应蛋白	5.5	mg/l	0-8	M	2016-11-29 10:53:10	凝血酶原时间(PT)	14	S	42992	M	2016-11-29 10:52:38
318	1000141300002	凝血酶原国际比值	0.91		0.7-1.3	M	2014-10-08 13:03:19	低密度脂蛋白	3.15	mmol/l	健康人群:1.8-3.36;心脑血管疾病危险人群:<2.59	M	2014-10-08 11:41:01	部分凝血活酶时间	27	S	22-45	M	2014-10-08 13:00:58	*总胆固醇	5.23	mmol/l	3.6-5.17	H	2014-10-08 11:41:01	D二聚体	569	ng/ml	0-115	H	2014-10-08 12:26:39	*葡萄糖	5.97	mmol/l	3.89-6.11	M	2014-10-08 11:41:01	C反应蛋白	3.2	mg/l	0-8	M	2014-10-08 11:41:01	凝血酶原时间(PT)	12	S	43023	M	2014-10-08 13:03:19
319	1000141365003	凝血酶原国际比值	0.88		0.7-1.3	M	2015-11-30 11:28:56	低密度脂蛋白	2.79	mmol/l	健康人群:1.8-3.36;心脑血管疾病危险人群:<2.59	M	2015-11-30 11:33:40	部分凝血活酶时间	28.7	S	22-45	M	2015-11-30 11:28:56	*总胆固醇	5.14	mmol/l	3.6-5.17	M	2015-11-30 11:33:40	D二聚体	20	ng/ml	0-115	M	2015-11-30 11:28:56	*葡萄糖	5.18	mmol/l	3.89-6.11	M	2015-11-30 11:33:40	C反应蛋白	0.19	mg/l	0-8	M	2015-11-30 11:33:40	凝血酶原时间(PT)	10.2	S	42992	M	2015-11-30 11:28:56
320	1000141367003	凝血酶原国际比值	1.02		0.7-1.3	M	2016-01-15 10:31:26	低密度脂蛋白	2.98	mmol/l	健康人群:1.8-3.36;心脑血管疾病危险人群:<2.59	M	2016-01-15 10:05:53	部分凝血活酶时间	28.5	S	22-45	M	2016-01-15 10:31:26	*总胆固醇	5.44	mmol/l	3.6-5.17	H	2016-01-15 10:05:53	D二聚体	170	ng/ml	0-115	H	2016-01-15 10:31:26	*葡萄糖	5.5	mmol/l	3.89-6.11	M	2016-01-15 10:05:53	C反应蛋白	5.44	mg/l	0-8	M	2016-01-15 10:05:53	凝血酶原时间(PT)	11.7	S	42992	M	2016-01-15 10:31:26
321	1000141463002	凝血酶原国际比值	0.85		0.7-1.3	M	2015-09-12 10:35:45	低密度脂蛋白	3.99	mmol/l	健康人群:1.8-3.36;心脑血管疾病危险人群:<2.59	M	2015-09-12 10:18:14	部分凝血活酶时间	29.2	S	22-45	M	2015-09-12 10:35:45	*总胆固醇	6.99	mmol/l	3.6-5.17	H	2015-09-12 10:18:14	D二聚体	1250	ng/ml	0-115	H	2015-09-12 10:35:45	*葡萄糖	13.14	mmol/l	3.89-6.11	H	2015-09-12 10:18:14	C反应蛋白	239.08	mg/l	0-8	H	2015-09-12 10:18:14	凝血酶原时间(PT)	9.8	S	42992	M	2015-09-12 10:35:45
322	1000142521002	凝血酶原国际比值	0.91		0.7-1.3	M	2015-10-21 10:51:34	低密度脂蛋白	3.82	mmol/l	健康人群:1.8-3.36;心脑血管疾病危险人群:<2.59	M	2015-10-21 10:41:31	部分凝血活酶时间	26.8	S	22-45	M	2015-10-21 10:51:34	*总胆固醇	6.87	mmol/l	3.6-5.17	H	2015-10-21 10:41:31	D二聚体	70	ng/ml	0-115	M	2015-10-21 10:51:34	*葡萄糖	5.27	mmol/l	3.89-6.11	M	2015-10-21 10:41:31	C反应蛋白	0.73	mg/l	0-8	M	2015-10-21 11:26:49	凝血酶原时间(PT)	10.5	S	42992	M	2015-10-21 10:51:34
323	1000143579002	凝血酶原国际比值	0.9		0.7-1.3	M	2014-12-25 10:04:47	低密度脂蛋白	5.12	mmol/l	健康人群:1.8-3.36;心脑血管疾病危险人群:<2.59	M	2014-12-25 10:07:41	部分凝血活酶时间	28.3	S	22-45	M	2014-12-25 10:05:52	*总胆固醇	8.1	mmol/l	3.6-5.17	H	2014-12-25 10:07:41	D二聚体	104	ng/ml	0-115	M	2014-12-25 09:37:31	*葡萄糖	7.32	mmol/l	3.89-6.11	H	2014-12-25 10:07:41	C反应蛋白	2.22	mg/l	0-8	M	2014-12-25 10:07:41	凝血酶原时间(PT)	11.9	S	43023	M	2014-12-25 10:04:47
324	1000144207004	凝血酶原国际比值	1.08		0.7-1.3	M	2017-01-07 11:18:57	低密度脂蛋白	0.74	mmol/l	健康人群:1.8-3.36;心脑血管疾病危险人群:<2.59	M	2017-01-07 10:09:11	部分凝血活酶时间	26.4	S	20-40	M	2017-01-07 11:18:57	*总胆固醇	2.1	mmol/l	3.6-5.17	L	2017-01-07 10:09:11	D二聚体	340	ng/ml	0-115	H	2017-01-07 11:18:57	*葡萄糖	11.82	mmol/l	3.89-6.11	H	2017-01-07 10:09:11	C反应蛋白	60.71	mg/l	0-8	H	2017-01-07 10:09:11	凝血酶原时间(PT)	12.4	S	42992	M	2017-01-07 11:18:57
325	1000144987005	凝血酶原国际比值	1.2		0.7-1.3	M	2015-02-07 10:03:50	低密度脂蛋白	1.25	mmol/l	健康人群:1.8-3.36;心脑血管疾病危险人群:<2.59	M	2015-02-07 09:37:25	部分凝血活酶时间	45	S	22-45	M	2015-02-07 11:03:04	*总胆固醇	2.59	mmol/l	3.6-5.17	L	2015-02-07 09:37:25	D二聚体	310	ng/ml	0-115	H	2015-02-07 10:03:50	*葡萄糖	14.86	mmol/l	3.89-6.11	H	2015-02-07 09:37:25	C反应蛋白	41.15	mg/l	0-8	H	2015-02-08 09:54:25	凝血酶原时间(PT)	13.8	S	42992	M	2015-02-07 10:03:50
326	1000145133003	凝血酶原国际比值	0.99		0.7-1.3	M	2015-11-25 10:39:17	低密度脂蛋白	3.32	mmol/l	健康人群:1.8-3.36;心脑血管疾病危险人群:<2.59	M	2015-11-25 11:05:59	部分凝血活酶时间	26.9	S	22-45	M	2015-11-25 10:39:17	*总胆固醇	5.27	mmol/l	3.6-5.17	H	2015-11-25 11:05:59	D二聚体	120	ng/ml	0-115	H	2015-11-25 10:39:17	*葡萄糖	4.98	mmol/l	3.89-6.11	M	2015-11-25 11:05:59	C反应蛋白	0.55	mg/l	0-8	M	2015-11-25 11:05:59	凝血酶原时间(PT)	11.4	S	42992	M	2015-11-25 10:39:17
327	1000145870003	凝血酶原国际比值	0.93		0.7-1.3	M	2015-12-22 10:56:30	低密度脂蛋白	3.46	mmol/l	健康人群:1.8-3.36;心脑血管疾病危险人群:<2.59	M	2015-12-22 10:43:46	部分凝血活酶时间	30.9	S	22-45	M	2015-12-22 10:56:30	*总胆固醇	5.9	mmol/l	3.6-5.17	H	2015-12-22 10:43:46	D二聚体	50	ng/ml	0-115	M	2015-12-22 10:56:30	*葡萄糖	7.22	mmol/l	3.89-6.11	H	2015-12-22 10:43:46	C反应蛋白	3.6	mg/l	0-8	M	2015-12-22 10:43:46	凝血酶原时间(PT)	10.7	S	42992	M	2015-12-22 10:56:30
328	1000145985002	凝血酶原国际比值	0.99		0.7-1.3	M	2015-02-03 11:52:07	低密度脂蛋白	2.48	mmol/l	健康人群:1.8-3.36;心脑血管疾病危险人群:<2.59	M	2015-02-03 11:31:09	部分凝血活酶时间	29	S	22-45	M	2015-02-03 11:52:07	*总胆固醇	4.16	mmol/l	3.6-5.17	M	2015-02-03 11:31:09	D二聚体	89	ng/ml	0-115	M	2015-02-03 11:52:07	*葡萄糖	5.28	mmol/l	3.89-6.11	M	2015-02-03 11:31:09	C反应蛋白	1.8	mg/l	0-8	M	2015-02-03 11:43:50	凝血酶原时间(PT)	11.4	S	42992	M	2015-02-03 11:52:07
329	1000146452002	凝血酶原国际比值	1.15		0.7-1.3	M	2015-05-05 09:58:10	低密度脂蛋白	2.98	mmol/l	健康人群:1.8-3.36;心脑血管疾病危险人群:<2.59	M	2015-05-05 10:15:33	部分凝血活酶时间	40.2	S	22-45	M	2015-05-05 09:58:10	*总胆固醇	4.62	mmol/l	3.6-5.17	M	2015-05-05 10:15:33	D二聚体	320	ng/ml	0-115	H	2015-05-05 09:58:10	*葡萄糖	4.99	mmol/l	3.89-6.11	M	2015-05-05 10:15:33	C反应蛋白	109.12	mg/l	0-8	H	2015-05-05 10:22:26	凝血酶原时间(PT)	13.2	S	42992	M	2015-05-05 09:58:10
330	1000146780002	凝血酶原国际比值	0.85		0.7-1.3	M	2015-12-22 10:57:51	低密度脂蛋白	2.5	mmol/l	健康人群:1.8-3.36;心脑血管疾病危险人群:<2.59	M	2015-12-22 10:48:50	部分凝血活酶时间	27.1	S	22-45	M	2015-12-22 10:57:51	*总胆固醇	4.76	mmol/l	3.6-5.17	M	2015-12-22 10:48:50	D二聚体	370	ng/ml	0-115	H	2015-12-22 10:57:51	*葡萄糖	6.32	mmol/l	3.89-6.11	H	2015-12-22 10:48:50	C反应蛋白	7.85	mg/l	0-8	M	2015-12-22 10:48:50	凝血酶原时间(PT)	9.8	S	42992	M	2015-12-22 10:57:51
331	1000147043002	凝血酶原国际比值	0.99		0.7-1.3	M	2014-11-03 10:28:49	低密度脂蛋白	3.71	mmol/l	健康人群:1.8-3.36;心脑血管疾病危险人群:<2.59	M	2014-11-03 09:28:54	部分凝血活酶时间	28	S	22-45	M	2014-11-03 10:28:49	*总胆固醇	6.32	mmol/l	3.6-5.17	H	2014-11-03 09:28:54	D二聚体	20	ng/ml	0-115	M	2014-11-03 10:28:49	*葡萄糖	5.82	mmol/l	3.89-6.11	M	2014-11-03 09:28:53	C反应蛋白	0.09	mg/l	0-8	M	2014-11-03 09:29:22	凝血酶原时间(PT)	11.4	S	42992	M	2014-11-03 10:28:49
332	1000147055003	凝血酶原国际比值	0.97		0.7-1.3	M	2014-10-07 10:46:44	低密度脂蛋白	2.23	mmol/l	健康人群:1.8-3.36;心脑血管疾病危险人群:<2.59	M	2014-10-07 09:25:44	部分凝血活酶时间	31	S	22-45	M	2014-10-07 10:46:44	*总胆固醇	4.02	mmol/l	3.6-5.17	M	2014-10-07 09:25:44	D二聚体	170	ng/ml	0-115	H	2014-10-07 10:53:45	*葡萄糖	4.81	mmol/l	3.89-6.11	M	2014-10-07 09:25:44	C反应蛋白	36.18	mg/l	0-8	H	2014-10-13 09:02:57	凝血酶原时间(PT)	11.1	S	42992	M	2014-10-07 10:46:44
333	1000147178002	凝血酶原国际比值	0.86		0.7-1.3	M	2015-03-12 09:59:22	低密度脂蛋白	2.73	mmol/l	健康人群:1.8-3.36;心脑血管疾病危险人群:<2.59	M	2015-03-12 10:19:23	部分凝血活酶时间	22.7	S	22-45	M	2015-03-12 09:59:30	*总胆固醇	5.21	mmol/l	3.6-5.17	H	2015-03-12 10:19:23	D二聚体	790	ng/ml	0-115	H	2015-03-12 09:59:22	*葡萄糖	5.02	mmol/l	3.89-6.11	M	2015-03-12 10:19:23	C反应蛋白	1	mg/l	0-8	M	2015-03-12 09:28:17	凝血酶原时间(PT)	9.9	S	42992	M	2015-03-12 09:59:22
334	1000147329003	凝血酶原国际比值	0.97		0.7-1.3	M	2015-11-19 09:35:26	低密度脂蛋白	1.7	mmol/l	健康人群:1.8-3.36;心脑血管疾病危险人群:<2.59	M	2015-11-19 09:37:49	部分凝血活酶时间	33.5	S	22-45	M	2015-11-19 09:35:26	*总胆固醇	3.85	mmol/l	3.6-5.17	M	2015-11-19 09:37:49	D二聚体	1520	ng/ml	0-115	H	2015-11-19 09:35:26	*葡萄糖	5.21	mmol/l	3.89-6.11	M	2015-11-19 09:37:49	C反应蛋白	17.72	mg/l	0-8	H	2015-11-19 17:14:32	凝血酶原时间(PT)	11.2	S	42992	M	2015-11-19 09:35:26
335	1000147515002	凝血酶原国际比值	1.09		0.7-1.3	M	2015-10-27 09:55:42	低密度脂蛋白	3.07	mmol/l	健康人群:1.8-3.36;心脑血管疾病危险人群:<2.59	M	2015-10-27 09:15:52	部分凝血活酶时间	29.1	S	22-45	M	2015-10-27 09:55:42	*总胆固醇	5.75	mmol/l	3.6-5.17	H	2015-10-27 09:15:52	D二聚体	2030	ng/ml	0-115	H	2015-10-27 09:55:42	*葡萄糖	6.14	mmol/l	3.89-6.11	H	2015-10-27 09:15:52	C反应蛋白	13.9	mg/l	0-8	H	2015-10-27 09:15:52	凝血酶原时间(PT)	12.5	S	42992	M	2015-10-27 09:55:42
336	1000147873002	凝血酶原国际比值	1.03		0.7-1.3	M	2015-02-02 13:26:12	低密度脂蛋白	2.54	mmol/l	健康人群:1.8-3.36;心脑血管疾病危险人群:<2.59	M	2015-02-02 13:25:34	部分凝血活酶时间	24.8	S	22-45	M	2015-02-02 13:26:12	*总胆固醇	4.66	mmol/l	3.6-5.17	M	2015-02-02 13:25:34	D二聚体	30	ng/ml	0-115	M	2015-02-02 13:26:12	*葡萄糖	4.98	mmol/l	3.89-6.11	M	2015-02-02 13:25:34	C反应蛋白	1.8	mg/l	0-8	M	2015-02-02 20:48:20	凝血酶原时间(PT)	11.9	S	42992	M	2015-02-02 13:26:12
337	1000148168002	凝血酶原国际比值	0.86		0.7-1.3	M	2014-10-16 10:33:10	低密度脂蛋白	2.36	mmol/l	健康人群:1.8-3.36;心脑血管疾病危险人群:<2.59	M	2014-10-16 10:06:11	部分凝血活酶时间	31.6	S	22-45	M	2014-10-16 09:18:49	*总胆固醇	4.64	mmol/l	3.6-5.17	M	2014-10-16 10:06:11	D二聚体	226	ng/ml	0-115	H	2014-10-16 10:32:50	*葡萄糖	5.29	mmol/l	3.89-6.11	M	2014-10-16 10:06:10	C反应蛋白	0.16	mg/l	0-8	M	2014-10-16 10:06:10	凝血酶原时间(PT)	11.3	S	43023	M	2014-10-16 10:33:03
338	1000148253003	凝血酶原国际比值	0.96		0.7-1.3	M	2015-10-15 09:50:41	低密度脂蛋白	0.9	mmol/l	健康人群:1.8-3.36;心脑血管疾病危险人群:<2.59	M	2015-10-15 09:44:47	部分凝血活酶时间	37.3	S	22-45	M	2015-10-15 10:02:18	*总胆固醇	2.82	mmol/l	3.6-5.17	L	2015-10-15 09:44:47	D二聚体	1368	ng/ml	0-115	H	2015-10-15 09:15:46	*葡萄糖	4.72	mmol/l	3.89-6.11	M	2015-10-15 09:44:47	C反应蛋白	127.6	mg/l	0-8	H	2015-10-27 19:36:27	凝血酶原时间(PT)	12.6	S	43023	M	2015-10-15 09:50:41
339	1000148361002	凝血酶原国际比值	0.85		0.7-1.3	M	2015-09-16 12:00:01	低密度脂蛋白	3.65	mmol/l	健康人群:1.8-3.36;心脑血管疾病危险人群:<2.59	M	2015-09-16 12:03:49	部分凝血活酶时间	25.9	S	22-45	M	2015-09-16 12:00:01	*总胆固醇	6.7	mmol/l	3.6-5.17	H	2015-09-16 12:03:49	D二聚体	150	ng/ml	0-115	H	2015-09-16 12:00:01	*葡萄糖	4.75	mmol/l	3.89-6.11	M	2015-09-16 12:03:49	C反应蛋白	0.49	mg/l	0-8	M	2015-09-16 12:03:49	凝血酶原时间(PT)	9.8	S	42992	M	2015-09-16 12:00:01
340	1000148389002	凝血酶原国际比值	0.95		0.7-1.3	M	2017-02-08 10:42:52	低密度脂蛋白	2.87	mmol/l	健康人群:1.8-3.36;心脑血管疾病危险人群:<2.59	M	2017-02-08 10:24:34	部分凝血活酶时间	27.1	S	20-40	M	2017-02-08 10:42:52	*总胆固醇	4.82	mmol/l	3.6-5.17	M	2017-02-08 10:24:34	D二聚体	130	ng/ml	0-115	H	2017-02-08 10:42:52	*葡萄糖	6.67	mmol/l	3.89-6.11	H	2017-02-08 10:24:34	C反应蛋白	8.46	mg/l	0-8	H	2017-02-08 10:24:34	凝血酶原时间(PT)	10.9	S	42992	M	2017-02-08 10:42:52
341	1000148399002	凝血酶原国际比值	0.98		0.7-1.3	M	2015-01-17 10:29:41	低密度脂蛋白	2.9	mmol/l	健康人群:1.8-3.36;心脑血管疾病危险人群:<2.59	M	2015-01-17 09:36:21	部分凝血活酶时间	36.1	S	22-45	M	2015-01-17 10:27:20	*总胆固醇	5.31	mmol/l	3.6-5.17	H	2015-01-17 09:36:21	D二聚体	1987	ng/ml	0-115	H	2015-01-20 11:49:03	*葡萄糖	5.53	mmol/l	3.89-6.11	M	2015-01-17 09:36:21	C反应蛋白	17.57	mg/l	0-8	H	2015-01-17 09:36:21	凝血酶原时间(PT)	12.9	S	43023	M	2015-01-17 10:29:41
342	1000148528002	凝血酶原国际比值	0.81		0.7-1.3	M	2015-05-27 11:48:56	低密度脂蛋白	2.72	mmol/l	健康人群:1.8-3.36;心脑血管疾病危险人群:<2.59	M	2015-05-27 12:50:44	部分凝血活酶时间	24.8	S	22-45	M	2015-05-27 11:48:56	*总胆固醇	5.8	mmol/l	3.6-5.17	H	2015-05-27 12:50:44	D二聚体	40	ng/ml	0-115	M	2015-05-27 11:48:56	*葡萄糖	6.7	mmol/l	3.89-6.11	H	2015-05-27 12:50:44	C反应蛋白	1.8	mg/l	0-8	M	2015-05-27 12:50:44	凝血酶原时间(PT)	9.3	S	42992	M	2015-05-27 11:48:56
343	1000148875002	凝血酶原国际比值	0.88		0.7-1.3	M	2014-11-01 11:09:39	低密度脂蛋白	2.92	mmol/l	健康人群:1.8-3.36;心脑血管疾病危险人群:<2.59	M	2014-11-01 11:00:50	部分凝血活酶时间	21.3	S	22-45	L	2014-11-01 11:49:32	*总胆固醇	6.1	mmol/l	3.6-5.17	H	2014-11-01 11:00:50	D二聚体	40	ng/ml	0-115	M	2014-11-01 11:49:05	*葡萄糖	4.27	mmol/l	3.89-6.11	M	2014-11-01 11:00:50	C反应蛋白	1.36	mg/l	0-8	M	2014-11-01 11:19:12	凝血酶原时间(PT)	10.1	S	42992	M	2014-11-01 11:09:39
344	1000149438002	凝血酶原国际比值	1.02		0.7-1.3	M	2014-09-11 11:11:41	低密度脂蛋白	2.85	mmol/l	健康人群:1.8-3.36;心脑血管疾病危险人群:<2.59	M	2014-09-11 10:25:02	部分凝血活酶时间	25.6	S	22-45	M	2014-09-11 11:16:05	*总胆固醇	5.41	mmol/l	3.6-5.17	H	2014-09-11 10:25:02	D二聚体	30	ng/ml	0-115	M	2014-09-11 11:11:41	*葡萄糖	4.77	mmol/l	3.89-6.11	M	2014-09-11 10:25:02	C反应蛋白	7.78	mg/l	0-8	M	2014-09-13 09:14:23	凝血酶原时间(PT)	11.7	S	42992	M	2014-09-11 11:11:41
345	1000149699005	凝血酶原国际比值	0.96		0.7-1.3	M	2015-10-30 10:58:27	低密度脂蛋白	2.05	mmol/l	健康人群:1.8-3.36;心脑血管疾病危险人群:<2.59	M	2015-10-30 11:12:29	部分凝血活酶时间	30.4	S	22-45	M	2015-10-30 10:58:27	*总胆固醇	4.49	mmol/l	3.6-5.17	M	2015-10-30 11:12:29	D二聚体	230	ng/ml	0-115	H	2015-10-30 10:58:27	*葡萄糖	5.54	mmol/l	3.89-6.11	M	2015-10-30 11:12:29	C反应蛋白	70.4	mg/l	0-8	H	2015-11-14 09:15:41	凝血酶原时间(PT)	11.1	S	42992	M	2015-10-30 10:58:27
346	1000149876003	凝血酶原国际比值	0.98		0.7-1.3	M	2016-07-15 10:07:41	低密度脂蛋白	3.89	mmol/l	健康人群:1.8-3.36;心脑血管疾病危险人群:<2.59	M	2016-07-15 09:11:03	部分凝血活酶时间	31.3	S	22-45	M	2016-07-15 09:51:48	*总胆固醇	6.72	mmol/l	3.6-5.17	H	2016-07-15 09:11:03	D二聚体	26	ng/ml	0-115	M	2016-07-15 09:33:07	*葡萄糖	5.25	mmol/l	3.89-6.11	M	2016-07-15 09:11:03	C反应蛋白	0.16	mg/l	0-8	M	2016-07-15 09:15:49	凝血酶原时间(PT)	12.1	S	43023	M	2016-07-15 10:07:41
347	1000150053003	凝血酶原国际比值	1.15		0.7-1.3	M	2016-08-12 08:59:55	低密度脂蛋白	1.87	mmol/l	健康人群:1.8-3.36;心脑血管疾病危险人群:<2.59	M	2016-08-06 09:15:58	部分凝血活酶时间	29.1	S	20-40	M	2016-08-12 08:59:55	*总胆固醇	3.9	mmol/l	3.6-5.17	M	2016-08-06 09:15:58	D二聚体	920	ng/ml	0-115	H	2016-08-12 10:22:46	*葡萄糖	21.04	mmol/l	3.89-6.11	H	2016-08-06 09:48:15	C反应蛋白	33.37	mg/l	0-8	H	2016-08-06 09:15:58	凝血酶原时间(PT)	13.2	S	42992	M	2016-08-12 08:59:55
348	1000150487002	凝血酶原国际比值	0.87		0.7-1.3	M	2014-10-21 11:58:53	低密度脂蛋白	2.81	mmol/l	健康人群:1.8-3.36;心脑血管疾病危险人群:<2.59	M	2014-10-21 12:04:47	部分凝血活酶时间	32	S	22-45	M	2014-10-21 11:54:56	*总胆固醇	4.74	mmol/l	3.6-5.17	M	2014-10-21 12:04:47	D二聚体	525	ng/ml	0-115	H	2014-10-21 11:38:03	*葡萄糖	3.8	mmol/l	3.89-6.11	L	2014-10-21 12:04:47	C反应蛋白	0.44	mg/l	0-8	M	2014-10-21 11:57:30	凝血酶原时间(PT)	11.5	S	43023	M	2014-10-21 11:58:53
349	1000150746002	凝血酶原国际比值	0.95		0.7-1.3	M	2016-07-11 11:16:44	低密度脂蛋白	2.63	mmol/l	健康人群:1.8-3.36;心脑血管疾病危险人群:<2.59	M	2016-07-11 10:59:19	部分凝血活酶时间	22	S	20-40	M	2016-07-11 11:16:44	*总胆固醇	5.02	mmol/l	3.6-5.17	M	2016-07-11 10:59:19	D二聚体	340	ng/ml	0-115	H	2016-07-11 11:16:44	*葡萄糖	5.41	mmol/l	3.89-6.11	M	2016-07-11 10:59:19	C反应蛋白	0.83	mg/l	0-8	M	2016-07-11 11:15:53	凝血酶原时间(PT)	10.9	S	42992	M	2016-07-11 11:16:44
350	1000150772002	凝血酶原国际比值	1.06		0.7-1.3	M	2014-10-14 12:39:29	低密度脂蛋白	2.92	mmol/l	健康人群:1.8-3.36;心脑血管疾病危险人群:<2.59	M	2014-10-14 09:48:12	部分凝血活酶时间	18.7	S	22-45	L	2014-10-14 12:39:29	*总胆固醇	4.74	mmol/l	3.6-5.17	M	2014-10-14 09:48:12	D二聚体	30	ng/ml	0-115	M	2014-10-14 12:39:29	*葡萄糖	3.46	mmol/l	3.89-6.11	L	2014-10-14 09:48:12	C反应蛋白	1.06	mg/l	0-8	M	2014-10-14 09:54:02	凝血酶原时间(PT)	12.2	S	42992	M	2014-10-14 12:39:29
351	1000151088002	凝血酶原国际比值	1.09		0.7-1.3	M	2016-02-25 10:40:03	低密度脂蛋白	2.12	mmol/l	健康人群:1.8-3.36;心脑血管疾病危险人群:<2.59	M	2016-02-25 10:18:48	部分凝血活酶时间	40.1	S	22-45	M	2016-02-25 10:41:24	*总胆固醇	4.19	mmol/l	3.6-5.17	M	2016-02-25 10:18:48	D二聚体	606	ng/ml	0-115	H	2016-02-25 10:09:47	*葡萄糖	5.55	mmol/l	3.89-6.11	M	2016-02-25 10:18:48	C反应蛋白	7.4	mg/l	0-8	M	2016-02-25 10:18:48	凝血酶原时间(PT)	14.7	S	43023	M	2016-02-25 10:40:03
352	1000151682002	凝血酶原国际比值	0.98		0.7-1.3	M	2016-03-09 17:26:43	低密度脂蛋白	1.91	mmol/l	健康人群:1.8-3.36;心脑血管疾病危险人群:<2.59	M	2016-03-09 09:04:28	部分凝血活酶时间	30.6	S	22-45	M	2016-03-09 17:26:43	*总胆固醇	3.97	mmol/l	3.6-5.17	M	2016-03-09 09:04:28	D二聚体	1140	ng/ml	0-115	H	2016-03-09 17:26:43	*葡萄糖	6.6	mmol/l	3.89-6.11	H	2016-03-09 09:04:28	C反应蛋白	1.4	mg/l	0-8	M	2016-03-25 13:05:08	凝血酶原时间(PT)	11.3	S	42992	M	2016-03-09 17:26:43
353	1000151725002	凝血酶原国际比值	1.07		0.7-1.3	M	2017-03-28 10:54:37	低密度脂蛋白	1.63	mmol/l	健康人群:1.8-3.36;心脑血管疾病危险人群:<2.59	M	2017-03-28 09:33:04	部分凝血活酶时间	33.6	S	20-40	M	2017-03-28 10:54:37	*总胆固醇	2.98	mmol/l	3.6-5.17	L	2017-03-28 09:33:04	D二聚体	490	ng/ml	0-115	H	2017-03-28 10:54:37	*葡萄糖	4.74	mmol/l	3.89-6.11	M	2017-03-28 09:33:04	C反应蛋白	63.17	mg/l	0-8	H	2017-04-01 09:34:13	凝血酶原时间(PT)	12.3	S	42992	M	2017-03-28 10:54:37
354	1000152223003	凝血酶原国际比值	0.91		0.7-1.3	M	2016-05-19 10:58:17	低密度脂蛋白	2.11	mmol/l	健康人群:1.8-3.36;心脑血管疾病危险人群:<2.59	M	2016-05-19 10:25:56	部分凝血活酶时间	26.2	S	22-45	M	2016-05-19 10:58:17	*总胆固醇	4.58	mmol/l	3.6-5.17	M	2016-05-19 10:25:56	D二聚体	20	ng/ml	0-115	M	2016-05-19 10:58:17	*葡萄糖	7.63	mmol/l	3.89-6.11	H	2016-05-19 10:25:56	C反应蛋白	0.11	mg/l	0-8	M	2016-05-19 10:49:37	凝血酶原时间(PT)	10.5	S	42992	M	2016-05-19 10:58:17
355	1000152465003	凝血酶原国际比值	0.89		0.7-1.3	M	2015-11-01 10:51:08	低密度脂蛋白	2.08	mmol/l	健康人群:1.8-3.36;心脑血管疾病危险人群:<2.59	M	2015-11-01 11:16:01	部分凝血活酶时间	35.4	S	22-45	M	2015-11-01 10:51:08	*总胆固醇	4	mmol/l	3.6-5.17	M	2015-11-01 11:16:01	D二聚体	170	ng/ml	0-115	H	2015-11-01 10:51:08	*葡萄糖	5.02	mmol/l	3.89-6.11	M	2015-11-01 11:16:01	C反应蛋白	1.62	mg/l	0-8	M	2015-11-01 11:16:01	凝血酶原时间(PT)	10.3	S	42992	M	2015-11-01 10:51:08
356	1000152520002	凝血酶原国际比值	0.88		0.7-1.3	M	2015-08-28 11:56:48	低密度脂蛋白	5.06	mmol/l	健康人群:1.8-3.36;心脑血管疾病危险人群:<2.59	M	2015-08-28 11:09:10	部分凝血活酶时间	23.7	S	22-45	M	2015-08-28 11:56:48	*总胆固醇	8.12	mmol/l	3.6-5.17	H	2015-08-28 11:09:10	D二聚体	100	ng/ml	0-115	M	2015-08-28 11:56:48	*葡萄糖	5.97	mmol/l	3.89-6.11	M	2015-08-28 11:09:10	C反应蛋白	5.54	mg/l	0-8	M	2015-08-28 11:09:10	凝血酶原时间(PT)	10.2	S	42992	M	2015-08-28 11:56:48
357	1000152987002	凝血酶原国际比值	0.98		0.7-1.3	M	2016-05-20 10:56:53	低密度脂蛋白	2.37	mmol/l	健康人群:1.8-3.36;心脑血管疾病危险人群:<2.59	M	2016-05-20 10:32:36	部分凝血活酶时间	34.2	S	22-45	M	2016-05-20 10:56:53	*总胆固醇	4.92	mmol/l	3.6-5.17	M	2016-05-20 10:32:36	D二聚体	160	ng/ml	0-115	H	2016-05-20 10:56:53	*葡萄糖	4.96	mmol/l	3.89-6.11	M	2016-05-20 10:32:36	C反应蛋白	0.2	mg/l	0-8	M	2016-05-27 11:31:55	凝血酶原时间(PT)	11.3	S	42992	M	2016-05-20 10:56:53
358	1000153253002	凝血酶原国际比值	0.92		0.7-1.3	M	2014-10-22 11:56:54	低密度脂蛋白	3.22	mmol/l	健康人群:1.8-3.36;心脑血管疾病危险人群:<2.59	M	2014-10-22 11:40:27	部分凝血活酶时间	22.4	S	22-45	M	2014-10-22 12:02:43	*总胆固醇	5.44	mmol/l	3.6-5.17	H	2014-10-22 11:40:27	D二聚体	190	ng/ml	0-115	H	2014-10-22 11:56:54	*葡萄糖	4.54	mmol/l	3.89-6.11	M	2014-10-22 11:40:27	C反应蛋白	2.06	mg/l	0-8	M	2014-10-22 11:40:27	凝血酶原时间(PT)	10.6	S	42992	M	2014-10-22 11:56:54
359	1000153253003	凝血酶原国际比值	0.95		0.7-1.3	M	2014-11-17 17:41:17	低密度脂蛋白	2.85	mmol/l	健康人群:1.8-3.36;心脑血管疾病危险人群:<2.59	M	2014-11-18 09:01:12	部分凝血活酶时间	30.6	S	22-45	M	2014-11-17 17:41:42	*总胆固醇	4.59	mmol/l	3.6-5.17	M	2014-11-18 09:01:12	D二聚体	2861	ng/ml	0-115	H	2014-11-17 17:35:50	*葡萄糖	12.73	mmol/l	3.89-6.11	H	2014-11-18 09:01:12	C反应蛋白	55.37	mg/l	0-8	H	2014-11-22 09:38:13	凝血酶原时间(PT)	12.5	S	43023	M	2014-11-17 17:41:17
360	1000153532002	凝血酶原国际比值	0.97		0.7-1.3	M	2016-03-27 09:58:16	低密度脂蛋白	2.12	mmol/l	健康人群:1.8-3.36;心脑血管疾病危险人群:<2.59	M	2016-03-27 09:15:31	部分凝血活酶时间	27.4	S	22-45	M	2016-03-27 09:58:16	*总胆固醇	4.58	mmol/l	3.6-5.17	M	2016-03-27 09:15:31	D二聚体	6400	ng/ml	0-115	H	2016-03-27 09:58:16	*葡萄糖	6.93	mmol/l	3.89-6.11	H	2016-03-27 09:15:31	C反应蛋白	43.99	mg/l	0-8	H	2016-03-28 09:46:58	凝血酶原时间(PT)	11.2	S	42992	M	2016-03-27 09:58:16
361	1000153935003	凝血酶原国际比值	0.86		0.7-1.3	M	2016-06-17 12:24:56	低密度脂蛋白	3.4	mmol/l	健康人群:1.8-3.36;心脑血管疾病危险人群:<2.59	M	2016-06-17 10:26:15	部分凝血活酶时间	20.2	S	20-40	M	2016-06-17 12:24:56	*总胆固醇	5.57	mmol/l	3.6-5.17	H	2016-06-17 10:26:15	D二聚体	880	ng/ml	0-115	H	2016-06-17 12:24:56	*葡萄糖	4.94	mmol/l	3.89-6.11	M	2016-06-17 10:26:15	C反应蛋白	0.83	mg/l	0-8	M	2016-06-17 10:26:15	凝血酶原时间(PT)	9.9	S	42992	M	2016-06-17 12:24:56
362	1000154243002	凝血酶原国际比值	0.98		0.7-1.3	M	2014-08-21 11:20:24	低密度脂蛋白	0.89	mmol/l	健康人群:1.8-3.36;心脑血管疾病危险人群:<2.59	M	2014-08-21 08:45:58	部分凝血活酶时间	29.5	S	22-45	M	2014-08-21 11:20:24	*总胆固醇	2.36	mmol/l	3.6-5.17	L	2014-08-21 08:45:58	D二聚体	1600	ng/ml	0-115	H	2014-08-21 11:20:24	*葡萄糖	5.77	mmol/l	3.89-6.11	M	2014-08-21 08:45:58	C反应蛋白	167.39	mg/l	0-8	H	2014-08-23 09:00:35	凝血酶原时间(PT)	11.3	S	42992	M	2014-08-21 11:20:24
363	1000154277005	凝血酶原国际比值	0.94		0.7-1.3	M	2016-07-13 14:09:45	低密度脂蛋白	2.61	mmol/l	健康人群:1.8-3.36;心脑血管疾病危险人群:<2.59	M	2016-07-13 13:16:10	部分凝血活酶时间	24.7	S	20-40	M	2016-07-13 14:09:45	*总胆固醇	4.45	mmol/l	3.6-5.17	M	2016-07-13 13:16:10	D二聚体	50	ng/ml	0-115	M	2016-07-13 14:39:23	*葡萄糖	4.51	mmol/l	3.89-6.11	M	2016-07-13 13:16:10	C反应蛋白	0.59	mg/l	0-8	M	2016-07-13 13:09:50	凝血酶原时间(PT)	10.8	S	42992	M	2016-07-13 14:09:45
364	1000154302003	凝血酶原国际比值	0.89		0.7-1.3	M	2015-10-28 12:49:54	低密度脂蛋白	2.79	mmol/l	健康人群:1.8-3.36;心脑血管疾病危险人群:<2.59	M	2015-10-28 11:55:24	部分凝血活酶时间	33.4	S	22-45	M	2015-10-28 12:45:58	*总胆固醇	2.31	mmol/l	3.6-5.17	L	2015-10-28 11:55:24	D二聚体	143	ng/ml	0-115	H	2015-10-28 12:09:20	*葡萄糖	5.07	mmol/l	3.89-6.11	M	2015-10-28 11:55:24	C反应蛋白	6.58	mg/l	0-8	M	2015-10-28 11:55:24	凝血酶原时间(PT)	11.7	S	43023	M	2015-10-28 12:49:54
365	1000154302004	凝血酶原国际比值	1.09		0.7-1.3	M	2016-12-21 10:51:17	低密度脂蛋白	2.71	mmol/l	健康人群:1.8-3.36;心脑血管疾病危险人群:<2.59	M	2016-12-21 10:09:28	部分凝血活酶时间	37.5	S	25-45	M	2016-12-21 10:49:21	*总胆固醇	5.1	mmol/l	3.6-5.17	M	2016-12-21 10:09:28	D二聚体	4242	ng/ml	0-115	H	2016-12-21 10:13:13	*葡萄糖	5.07	mmol/l	3.89-6.11	M	2016-12-21 10:09:28	C反应蛋白	62.09	mg/l	0-8	H	2016-12-21 10:09:28	凝血酶原时间(PT)	13.5	S	43023	M	2016-12-21 10:51:17
366	1000154362002	凝血酶原国际比值	1.04		0.7-1.3	M	2016-05-10 09:49:51	低密度脂蛋白	2.15	mmol/l	健康人群:1.8-3.36;心脑血管疾病危险人群:<2.59	M	2016-05-10 10:22:01	部分凝血活酶时间	25.8	S	22-45	M	2016-05-10 09:49:51	*总胆固醇	3.84	mmol/l	3.6-5.17	M	2016-05-10 10:22:01	D二聚体	90	ng/ml	0-115	M	2016-05-10 09:49:51	*葡萄糖	4.82	mmol/l	3.89-6.11	M	2016-05-10 10:22:01	C反应蛋白	0.36	mg/l	0-8	M	2016-05-10 10:22:01	凝血酶原时间(PT)	12	S	42992	M	2016-05-10 09:49:51
367	1000154444004	凝血酶原国际比值	0.95		0.7-1.3	M	2014-10-27 14:08:06	低密度脂蛋白	3.11	mmol/l	健康人群:1.8-3.36;心脑血管疾病危险人群:<2.59	M	2014-10-27 14:10:35	部分凝血活酶时间	24.3	S	22-45	M	2014-10-27 14:08:06	*总胆固醇	5.4	mmol/l	3.6-5.17	H	2014-10-27 14:10:35	D二聚体	200	ng/ml	0-115	H	2014-10-27 14:08:06	*葡萄糖	6	mmol/l	3.89-6.11	M	2014-10-27 14:10:35	C反应蛋白	14.4	mg/l	0-8	H	2014-10-27 14:10:35	凝血酶原时间(PT)	10.9	S	42992	M	2014-10-27 14:08:06
368	1000154728003	凝血酶原国际比值	1.15		0.7-1.3	M	2015-01-04 09:28:14	低密度脂蛋白	2.29	mmol/l	健康人群:1.8-3.36;心脑血管疾病危险人群:<2.59	M	2015-01-04 09:11:26	部分凝血活酶时间	52.1	S	22-45	H	2015-01-04 09:28:14	*总胆固醇	5.2	mmol/l	3.6-5.17	H	2015-01-04 09:11:26	D二聚体	80	ng/ml	0-115	M	2015-01-04 09:28:14	*葡萄糖	6.5	mmol/l	3.89-6.11	H	2015-01-04 09:11:26	C反应蛋白	286.9	mg/l	0-8	H	2015-01-04 09:13:45	凝血酶原时间(PT)	13.2	S	42992	M	2015-01-04 09:28:14
369	1000154728004	凝血酶原国际比值	0.97		0.7-1.3	M	2015-06-12 10:34:08	低密度脂蛋白	2.59	mmol/l	健康人群:1.8-3.36;心脑血管疾病危险人群:<2.59	M	2015-06-12 08:57:12	部分凝血活酶时间	38.9	S	22-45	M	2015-06-12 10:34:08	*总胆固醇	4.31	mmol/l	3.6-5.17	M	2015-06-12 08:57:12	D二聚体	630	ng/ml	0-115	H	2015-06-12 10:34:08	*葡萄糖	6.03	mmol/l	3.89-6.11	M	2015-06-12 08:57:12	C反应蛋白	157.67	mg/l	0-8	H	2015-06-12 09:34:15	凝血酶原时间(PT)	11.2	S	42992	M	2015-06-12 10:34:08
370	1000154728005	凝血酶原国际比值	0.97		0.7-1.3	M	2016-01-20 09:07:22	低密度脂蛋白	2.88	mmol/l	健康人群:1.8-3.36;心脑血管疾病危险人群:<2.59	M	2016-01-20 09:19:44	部分凝血活酶时间	32.3	S	22-45	M	2016-01-20 09:07:22	*总胆固醇	5.06	mmol/l	3.6-5.17	M	2016-01-20 09:19:44	D二聚体	200	ng/ml	0-115	H	2016-01-20 09:07:22	*葡萄糖	5.72	mmol/l	3.89-6.11	M	2016-01-20 09:19:43	C反应蛋白	162	mg/l	0-8	H	2016-01-27 13:25:03	凝血酶原时间(PT)	11.2	S	42992	M	2016-01-20 09:07:22
371	1000154811002	凝血酶原国际比值	1.04		0.7-1.3	M	2015-12-29 09:58:13	低密度脂蛋白	1.48	mmol/l	健康人群:1.8-3.36;心脑血管疾病危险人群:<2.59	M	2015-12-29 10:19:49	部分凝血活酶时间	30.9	S	22-45	M	2015-12-29 09:58:13	*总胆固醇	3.2	mmol/l	3.6-5.17	L	2015-12-29 10:19:49	D二聚体	1160	ng/ml	0-115	H	2015-12-29 09:58:13	*葡萄糖	5.48	mmol/l	3.89-6.11	M	2015-12-29 10:19:49	C反应蛋白	3.31	mg/l	0-8	M	2015-12-29 10:19:49	凝血酶原时间(PT)	11.9	S	42992	M	2015-12-29 09:58:13
372	1000154941002	凝血酶原国际比值	0.97		0.7-1.3	M	2014-12-29 09:59:42	低密度脂蛋白	3.83	mmol/l	健康人群:1.8-3.36;心脑血管疾病危险人群:<2.59	M	2014-12-29 09:38:12	部分凝血活酶时间	28.8	S	22-45	M	2014-12-29 09:59:42	*总胆固醇	6.2	mmol/l	3.6-5.17	H	2014-12-29 09:38:12	D二聚体	1560	ng/ml	0-115	H	2014-12-29 09:59:42	*葡萄糖	7.33	mmol/l	3.89-6.11	H	2014-12-29 09:38:12	C反应蛋白	48.6	mg/l	0-8	H	2014-12-29 09:45:27	凝血酶原时间(PT)	11.2	S	42992	M	2014-12-29 09:59:42
373	1000154941006	凝血酶原国际比值	0.84		0.7-1.3	M	2016-07-13 11:00:14	低密度脂蛋白	4.23	mmol/l	健康人群:1.8-3.36;心脑血管疾病危险人群:<2.59	M	2016-07-13 09:53:34	部分凝血活酶时间	21.5	S	20-40	M	2016-07-13 11:00:14	*总胆固醇	8.01	mmol/l	3.6-5.17	H	2016-07-13 09:53:34	D二聚体	260	ng/ml	0-115	H	2016-07-13 11:00:14	*葡萄糖	8.5	mmol/l	3.89-6.11	H	2016-07-13 09:53:34	C反应蛋白	0.92	mg/l	0-8	M	2016-07-13 09:53:32	凝血酶原时间(PT)	9.7	S	42992	M	2016-07-13 11:00:14
374	1000155245003	凝血酶原国际比值	0.95		0.7-1.3	M	2015-05-18 10:30:39	低密度脂蛋白	4.61	mmol/l	健康人群:1.8-3.36;心脑血管疾病危险人群:<2.59	M	2015-05-18 10:28:30	部分凝血活酶时间	22.5	S	22-45	M	2015-05-18 11:03:09	*总胆固醇	7.21	mmol/l	3.6-5.17	H	2015-05-18 10:28:30	D二聚体	320	ng/ml	0-115	H	2015-05-18 10:30:39	*葡萄糖	5.62	mmol/l	3.89-6.11	M	2015-05-18 10:28:30	C反应蛋白	1.1	mg/l	0-8	M	2015-05-18 10:32:59	凝血酶原时间(PT)	10.9	S	42992	M	2015-05-18 10:30:39
375	1000155504007	凝血酶原国际比值	1.1		0.7-1.3	M	2016-09-24 10:49:36	低密度脂蛋白	2.25	mmol/l	健康人群:1.8-3.36;心脑血管疾病危险人群:<2.59	M	2016-09-24 10:35:29	部分凝血活酶时间	25	S	20-40	M	2016-09-24 10:49:36	*总胆固醇	4.36	mmol/l	3.6-5.17	M	2016-09-24 10:35:29	D二聚体	740	ng/ml	0-115	H	2016-09-24 10:49:36	*葡萄糖	5.06	mmol/l	3.89-6.11	M	2016-09-24 10:35:29	C反应蛋白	2.5	mg/l	0-8	M	2016-09-24 10:54:48	凝血酶原时间(PT)	12.6	S	42992	M	2016-09-24 10:49:36
376	1000155538003	凝血酶原国际比值	1.11		0.7-1.3	M	2016-09-24 11:41:24	低密度脂蛋白	2	mmol/l	健康人群:1.8-3.36;心脑血管疾病危险人群:<2.59	M	2016-09-24 12:02:18	部分凝血活酶时间	32.6	S	20-40	M	2016-09-24 11:41:24	*总胆固醇	3.7	mmol/l	3.6-5.17	M	2016-09-24 12:02:18	D二聚体	140	ng/ml	0-115	H	2016-09-24 11:41:24	*葡萄糖	5	mmol/l	3.89-6.11	M	2016-09-24 12:02:18	C反应蛋白	59.12	mg/l	0-8	H	2016-10-05 11:40:53	凝血酶原时间(PT)	12.7	S	42992	M	2016-09-24 11:41:24
377	1000155597002	凝血酶原国际比值	0.83		0.7-1.3	M	2015-05-08 11:08:29	低密度脂蛋白	2.75	mmol/l	健康人群:1.8-3.36;心脑血管疾病危险人群:<2.59	M	2015-05-08 10:33:40	部分凝血活酶时间	24.4	S	22-45	M	2015-05-08 11:12:06	*总胆固醇	5.55	mmol/l	3.6-5.17	H	2015-05-08 10:33:40	D二聚体	298	ng/ml	0-115	H	2015-05-08 10:30:50	*葡萄糖	5.08	mmol/l	3.89-6.11	M	2015-05-08 10:33:40	C反应蛋白	0.05	mg/l	0-8	M	2015-05-08 10:33:40	凝血酶原时间(PT)	11	S	43023	M	2015-05-08 11:08:29
378	1000155631002	凝血酶原国际比值	1.01		0.7-1.3	M	2016-06-27 13:50:56	低密度脂蛋白	2.52	mmol/l	健康人群:1.8-3.36;心脑血管疾病危险人群:<2.59	M	2016-06-27 13:50:45	部分凝血活酶时间	31.5	S	20-40	M	2016-06-27 13:50:56	*总胆固醇	4.7	mmol/l	3.6-5.17	M	2016-06-27 13:50:45	D二聚体	190	ng/ml	0-115	H	2016-06-27 13:50:56	*葡萄糖	5.3	mmol/l	3.89-6.11	M	2016-06-27 13:50:45	C反应蛋白	0.28	mg/l	0-8	M	2016-07-05 11:12:11	凝血酶原时间(PT)	11.6	S	42992	M	2016-06-27 13:50:56
379	1000155654002	凝血酶原国际比值	1.02		0.7-1.3	M	2014-09-13 10:58:23	低密度脂蛋白	2.35	mmol/l	健康人群:1.8-3.36;心脑血管疾病危险人群:<2.59	M	2014-09-13 09:42:17	部分凝血活酶时间	19.6	S	22-45	L	2014-09-13 10:58:23	*总胆固醇	4.4	mmol/l	3.6-5.17	M	2014-09-13 09:42:17	D二聚体	170	ng/ml	0-115	H	2014-09-13 10:58:23	*葡萄糖	5.92	mmol/l	3.89-6.11	M	2014-09-13 09:42:17	C反应蛋白	4.51	mg/l	0-8	M	2014-09-13 09:42:17	凝血酶原时间(PT)	11.7	S	42992	M	2014-09-13 10:58:23
380	1000155654004	凝血酶原国际比值	0.86		0.7-1.3	M	2015-07-02 07:46:17	低密度脂蛋白	2.51	mmol/l	健康人群:1.8-3.36;心脑血管疾病危险人群:<2.59	M	2015-07-02 08:23:25	部分凝血活酶时间	35.8	S	22-45	M	2015-07-02 07:34:45	*总胆固醇	4.2	mmol/l	3.6-5.17	M	2015-07-02 08:23:25	D二聚体	1014	ng/ml	0-115	H	2015-07-02 07:37:26	*葡萄糖	6.65	mmol/l	3.89-6.11	H	2015-07-02 08:23:25	C反应蛋白	15.74	mg/l	0-8	H	2015-07-07 09:15:39	凝血酶原时间(PT)	11.3	S	43023	M	2015-07-02 07:46:17
381	1000155654005	凝血酶原国际比值	0.97		0.7-1.3	M	2017-03-14 12:16:12	低密度脂蛋白	2.92	mmol/l	健康人群:1.8-3.36;心脑血管疾病危险人群:<2.59	M	2017-03-14 13:01:33	部分凝血活酶时间	24.4	S	20-40	M	2017-03-14 12:16:12	*总胆固醇	4.9	mmol/l	3.6-5.17	M	2017-03-14 13:01:33	D二聚体	90	ng/ml	0-115	M	2017-03-14 12:16:12	*葡萄糖	6	mmol/l	3.89-6.11	M	2017-03-14 13:01:33	C反应蛋白	3.3	mg/l	0-8	M	2017-03-14 12:53:15	凝血酶原时间(PT)	11.2	S	42992	M	2017-03-14 12:16:12
382	1000155657002	凝血酶原国际比值	0.86		0.7-1.3	M	2015-05-29 10:43:12	低密度脂蛋白	2.93	mmol/l	健康人群:1.8-3.36;心脑血管疾病危险人群:<2.59	M	2015-05-29 11:54:32	部分凝血活酶时间	22	S	22-45	M	2015-05-29 10:43:12	*总胆固醇	7.2	mmol/l	3.6-5.17	H	2015-05-29 11:54:32	D二聚体	70	ng/ml	0-115	M	2015-05-29 10:43:12	*葡萄糖	6	mmol/l	3.89-6.11	M	2015-05-29 11:54:31	C反应蛋白	0.4	mg/l	0-8	M	2015-05-29 11:54:32	凝血酶原时间(PT)	9.9	S	42992	M	2015-05-29 10:43:12
383	1000156309002	凝血酶原国际比值	1.04		0.7-1.3	M	2016-05-10 09:29:42	低密度脂蛋白	2.96	mmol/l	健康人群:1.8-3.36;心脑血管疾病危险人群:<2.59	M	2016-05-10 09:39:36	部分凝血活酶时间	28.1	S	22-45	M	2016-05-10 09:29:42	*总胆固醇	4.94	mmol/l	3.6-5.17	M	2016-05-10 09:39:36	D二聚体	80	ng/ml	0-115	M	2016-05-10 09:29:42	*葡萄糖	4.69	mmol/l	3.89-6.11	M	2016-05-10 09:39:36	C反应蛋白	0.02	mg/l	0-8	M	2016-05-10 09:39:36	凝血酶原时间(PT)	11.9	S	42992	M	2016-05-10 09:29:42
384	1000156338002	凝血酶原国际比值	0.83		0.7-1.3	M	2015-07-13 11:47:57	低密度脂蛋白	2.64	mmol/l	健康人群:1.8-3.36;心脑血管疾病危险人群:<2.59	M	2015-07-13 13:29:34	部分凝血活酶时间	22.4	S	22-45	M	2015-07-13 11:47:57	*总胆固醇	6.7	mmol/l	3.6-5.17	H	2015-07-13 13:29:34	D二聚体	1110	ng/ml	0-115	H	2015-07-13 11:47:57	*葡萄糖	4.1	mmol/l	3.89-6.11	M	2015-07-13 13:29:34	C反应蛋白	0.8	mg/l	0-8	M	2015-07-13 13:29:34	凝血酶原时间(PT)	9.6	S	42992	M	2015-07-13 11:47:57
385	1000156349002	凝血酶原国际比值	0.97		0.7-1.3	M	2015-04-03 10:03:25	低密度脂蛋白	3.24	mmol/l	健康人群:1.8-3.36;心脑血管疾病危险人群:<2.59	M	2015-04-03 09:59:36	部分凝血活酶时间	28.8	S	22-45	M	2015-04-03 10:03:25	*总胆固醇	6.19	mmol/l	3.6-5.17	H	2015-04-03 09:59:36	D二聚体	3010	ng/ml	0-115	H	2015-04-03 10:03:25	*葡萄糖	5.46	mmol/l	3.89-6.11	M	2015-04-03 09:59:36	C反应蛋白	236.12	mg/l	0-8	H	2015-04-04 10:37:07	凝血酶原时间(PT)	11.2	S	42992	M	2015-04-03 10:03:25
386	1000156367002	凝血酶原国际比值	0.91		0.7-1.3	M	2016-04-13 10:39:06	低密度脂蛋白	2.25	mmol/l	健康人群:1.8-3.36;心脑血管疾病危险人群:<2.59	M	2016-04-13 10:48:38	部分凝血活酶时间	24.1	S	22-45	M	2016-04-13 10:39:06	*总胆固醇	4.56	mmol/l	3.6-5.17	M	2016-04-13 10:48:38	D二聚体	50	ng/ml	0-115	M	2016-04-13 10:39:06	*葡萄糖	5.43	mmol/l	3.89-6.11	M	2016-04-13 10:48:38	C反应蛋白	0.75	mg/l	0-8	M	2016-04-13 11:33:07	凝血酶原时间(PT)	10.5	S	42992	M	2016-04-13 10:39:06
387	1000156510002	凝血酶原国际比值	0.83		0.7-1.3	M	2015-09-15 10:42:57	低密度脂蛋白	2.18	mmol/l	健康人群:1.8-3.36;心脑血管疾病危险人群:<2.59	M	2015-09-15 09:36:00	部分凝血活酶时间	31.6	S	22-45	M	2015-09-15 10:42:57	*总胆固醇	4.65	mmol/l	3.6-5.17	M	2015-09-15 09:36:00	D二聚体	120	ng/ml	0-115	H	2015-09-15 10:42:57	*葡萄糖	5.05	mmol/l	3.89-6.11	M	2015-09-15 09:36:00	C反应蛋白	2	mg/l	0-8	M	2015-09-15 09:36:00	凝血酶原时间(PT)	9.6	S	42992	M	2015-09-15 10:42:57
388	1000156814002	凝血酶原国际比值	1		0.7-1.3	M	2016-09-24 10:53:17	低密度脂蛋白	3.57	mmol/l	健康人群:1.8-3.36;心脑血管疾病危险人群:<2.59	M	2016-09-24 12:16:46	部分凝血活酶时间	26.8	S	20-40	M	2016-09-24 10:53:17	*总胆固醇	5.9	mmol/l	3.6-5.17	H	2016-09-24 12:16:46	D二聚体	70	ng/ml	0-115	M	2016-09-24 10:53:17	*葡萄糖	4.5	mmol/l	3.89-6.11	M	2016-09-24 12:16:46	C反应蛋白	5.06	mg/l	0-8	M	2016-09-24 10:59:36	凝血酶原时间(PT)	11.5	S	42992	M	2016-09-24 10:53:17
389	1000157311004	凝血酶原国际比值	0.8		0.7-1.3	M	2015-11-10 11:19:03	低密度脂蛋白	4.4	mmol/l	健康人群:1.8-3.36;心脑血管疾病危险人群:<2.59	M	2015-11-10 10:38:29	部分凝血活酶时间	23.7	S	22-45	M	2015-11-10 11:19:03	*总胆固醇	7.21	mmol/l	3.6-5.17	H	2015-11-10 10:38:29	D二聚体	60	ng/ml	0-115	M	2015-11-10 11:19:03	*葡萄糖	5.13	mmol/l	3.89-6.11	M	2015-11-10 10:38:28	C反应蛋白	1.36	mg/l	0-8	M	2015-11-10 10:38:28	凝血酶原时间(PT)	9.2	S	42992	M	2015-11-10 11:19:03
390	1000157333002	凝血酶原国际比值	1.06		0.7-1.3	M	2014-10-21 09:34:51	低密度脂蛋白	2.12	mmol/l	健康人群:1.8-3.36;心脑血管疾病危险人群:<2.59	M	2014-10-21 10:23:07	部分凝血活酶时间	30.4	S	22-45	M	2014-10-21 09:34:51	*总胆固醇	3.64	mmol/l	3.6-5.17	M	2014-10-21 10:23:07	D二聚体	60	ng/ml	0-115	M	2014-10-21 09:34:51	*葡萄糖	3.67	mmol/l	3.89-6.11	L	2014-10-21 10:23:07	C反应蛋白	0.34	mg/l	0-8	M	2014-10-21 10:23:07	凝血酶原时间(PT)	12.2	S	42992	M	2014-10-21 09:34:51
391	1000157482002	凝血酶原国际比值	1.23		0.7-1.3	M	2014-11-11 10:42:42	低密度脂蛋白	2.79	mmol/l	健康人群:1.8-3.36;心脑血管疾病危险人群:<2.59	M	2014-11-11 09:30:07	部分凝血活酶时间	40.3	S	22-45	M	2014-11-11 10:42:42	*总胆固醇	4.56	mmol/l	3.6-5.17	M	2014-11-11 09:30:07	D二聚体	110	ng/ml	0-115	M	2014-11-11 11:12:27	*葡萄糖	4.7	mmol/l	3.89-6.11	M	2014-11-11 09:30:07	C反应蛋白	22.42	mg/l	0-8	H	2014-11-11 09:30:07	凝血酶原时间(PT)	14.2	S	42992	H	2014-11-11 10:42:42
392	1000157482005	凝血酶原国际比值	1.07		0.7-1.3	M	2015-10-12 13:25:43	低密度脂蛋白	4.38	mmol/l	健康人群:1.8-3.36;心脑血管疾病危险人群:<2.59	M	2015-10-12 13:18:06	部分凝血活酶时间	53	S	22-45	H	2015-10-12 13:20:17	*总胆固醇	7.76	mmol/l	3.6-5.17	H	2015-10-12 13:18:06	D二聚体	96	ng/ml	0-115	M	2015-10-12 13:04:52	*葡萄糖	5.1	mmol/l	3.89-6.11	M	2015-10-12 13:18:06	C反应蛋白	10.75	mg/l	0-8	H	2015-10-12 13:18:06	凝血酶原时间(PT)	14	S	43023	M	2015-10-12 13:25:43
393	1000157482008	凝血酶原国际比值	1.09		0.7-1.3	M	2016-10-08 10:10:44	低密度脂蛋白	2.82	mmol/l	健康人群:1.8-3.36;心脑血管疾病危险人群:<2.59	M	2016-10-08 11:28:35	部分凝血活酶时间	37.1	S	20-40	M	2016-10-08 10:10:44	*总胆固醇	4.33	mmol/l	3.6-5.17	M	2016-10-08 11:28:35	D二聚体	1160	ng/ml	0-115	H	2016-10-08 10:10:44	*葡萄糖	4.44	mmol/l	3.89-6.11	M	2016-10-08 11:28:35	C反应蛋白	62.95	mg/l	0-8	H	2016-10-08 11:28:35	凝血酶原时间(PT)	12.5	S	42992	M	2016-10-08 10:10:44
394	1000157529002	凝血酶原国际比值	1.03		0.7-1.3	M	2015-07-20 11:50:05	低密度脂蛋白	1.25	mmol/l	健康人群:1.8-3.36;心脑血管疾病危险人群:<2.59	M	2015-07-20 13:00:42	部分凝血活酶时间	29	S	22-45	M	2015-07-20 11:50:05	*总胆固醇	3.4	mmol/l	3.6-5.17	L	2015-07-20 13:00:42	D二聚体	130	ng/ml	0-115	H	2015-07-20 11:50:05	*葡萄糖	5.9	mmol/l	3.89-6.11	M	2015-07-20 13:00:42	C反应蛋白	1.4	mg/l	0-8	M	2015-07-20 13:00:42	凝血酶原时间(PT)	11.8	S	42992	M	2015-07-20 11:50:05
395	1000158453002	凝血酶原国际比值	0.96		0.7-1.3	M	2016-09-20 13:29:16	低密度脂蛋白	3.74	mmol/l	健康人群:1.8-3.36;心脑血管疾病危险人群:<2.59	M	2016-09-20 13:29:07	部分凝血活酶时间	25.1	S	20-40	M	2016-09-20 13:29:16	*总胆固醇	6.09	mmol/l	3.6-5.17	H	2016-09-20 13:29:07	D二聚体	120	ng/ml	0-115	H	2016-09-20 13:29:16	*葡萄糖	7.37	mmol/l	3.89-6.11	H	2016-09-20 13:29:07	C反应蛋白	46.08	mg/l	0-8	H	2016-09-20 13:47:44	凝血酶原时间(PT)	11	S	42992	M	2016-09-20 13:29:16
396	1000158503002	凝血酶原国际比值	0.9		0.7-1.3	M	2016-04-12 14:24:23	低密度脂蛋白	2.3	mmol/l	健康人群:1.8-3.36;心脑血管疾病危险人群:<2.59	M	2016-04-12 11:05:14	部分凝血活酶时间	24.7	S	22-45	M	2016-04-12 14:24:23	*总胆固醇	4.92	mmol/l	3.6-5.17	M	2016-04-12 11:05:14	D二聚体	250	ng/ml	0-115	H	2016-04-12 14:24:23	*葡萄糖	4.73	mmol/l	3.89-6.11	M	2016-04-12 11:05:14	C反应蛋白	1.72	mg/l	0-8	M	2016-04-12 11:05:14	凝血酶原时间(PT)	10.4	S	42992	M	2016-04-12 14:24:23
397	1000158809002	凝血酶原国际比值	1.12		0.7-1.3	M	2014-10-06 09:45:24	低密度脂蛋白	1.24	mmol/l	健康人群:1.8-3.36;心脑血管疾病危险人群:<2.59	M	2014-10-06 09:31:01	部分凝血活酶时间	35.6	S	22-45	M	2014-10-06 09:42:58	*总胆固醇	2.78	mmol/l	3.6-5.17	L	2014-10-06 09:31:01	D二聚体	360	ng/ml	0-115	H	2014-10-06 09:29:35	*葡萄糖	8.29	mmol/l	3.89-6.11	H	2014-10-06 09:31:01	C反应蛋白	15.4	mg/l	0-8	H	2014-10-10 07:27:31	凝血酶原时间(PT)	14.6	S	43023	M	2014-10-06 09:45:24
398	1000158818002	凝血酶原国际比值	1.12		0.7-1.3	M	2016-10-04 13:12:33	低密度脂蛋白	1.97	mmol/l	健康人群:1.8-3.36;心脑血管疾病危险人群:<2.59	M	2016-10-04 13:30:51	部分凝血活酶时间	25.6	S	20-40	M	2016-10-04 13:32:03	*总胆固醇	3.6	mmol/l	3.6-5.17	M	2016-10-04 13:30:51	D二聚体	180	ng/ml	0-115	H	2016-10-04 13:12:33	*葡萄糖	6.5	mmol/l	3.89-6.11	H	2016-10-04 13:30:51	C反应蛋白	12.1	mg/l	0-8	H	2016-10-04 13:30:51	凝血酶原时间(PT)	12.8	S	42992	M	2016-10-04 13:12:33
399	1000158881002	凝血酶原国际比值	1.09		0.7-1.3	M	2014-09-09 14:09:28	低密度脂蛋白	3.92	mmol/l	健康人群:1.8-3.36;心脑血管疾病危险人群:<2.59	M	2014-09-09 12:45:25	部分凝血活酶时间	18.5	S	22-45	L	2014-09-09 14:09:28	*总胆固醇	6.1	mmol/l	3.6-5.17	H	2014-09-09 12:45:25	D二聚体	60	ng/ml	0-115	M	2014-09-09 14:09:28	*葡萄糖	6.6	mmol/l	3.89-6.11	H	2014-09-09 12:45:25	C反应蛋白	1.7	mg/l	0-8	M	2014-09-10 11:09:09	凝血酶原时间(PT)	12.6	S	42992	M	2014-09-09 14:09:28
400	1000158976006	凝血酶原国际比值	0.96		0.7-1.3	M	2016-09-21 12:16:39	低密度脂蛋白	3.88	mmol/l	健康人群:1.8-3.36;心脑血管疾病危险人群:<2.59	M	2016-09-21 11:21:33	部分凝血活酶时间	24.9	S	20-40	M	2016-09-21 12:16:39	*总胆固醇	6.63	mmol/l	3.6-5.17	H	2016-09-21 11:21:33	D二聚体	170	ng/ml	0-115	H	2016-09-21 12:16:39	*葡萄糖	4.9	mmol/l	3.89-6.11	M	2016-09-21 11:21:33	C反应蛋白	0.27	mg/l	0-8	M	2016-09-21 11:21:33	凝血酶原时间(PT)	11	S	42992	M	2016-09-21 12:16:39
401	1000159185004	凝血酶原国际比值	1.09		0.7-1.3	M	2016-11-30 11:44:39	低密度脂蛋白	4.53	mmol/l	健康人群:1.8-3.36;心脑血管疾病危险人群:<2.59	M	2016-11-30 11:29:04	部分凝血活酶时间	28.6	S	20-40	M	2016-11-30 11:33:25	*总胆固醇	7.14	mmol/l	3.6-5.17	H	2016-11-30 11:29:04	D二聚体	117	ng/ml	0-115	H	2016-11-30 11:23:02	*葡萄糖	4.58	mmol/l	3.89-6.11	M	2016-11-30 11:29:04	C反应蛋白	0.81	mg/l	0-8	M	2016-11-30 11:29:04	凝血酶原时间(PT)	13.5	S	43023	M	2016-11-30 11:44:39
402	1000159317002	凝血酶原国际比值	0.97		0.7-1.3	M	2015-05-16 10:47:34	低密度脂蛋白	1.82	mmol/l	健康人群:1.8-3.36;心脑血管疾病危险人群:<2.59	M	2015-05-16 10:31:43	部分凝血活酶时间	24.4	S	22-45	M	2015-05-16 10:47:34	*总胆固醇	3.05	mmol/l	3.6-5.17	L	2015-05-16 10:31:43	D二聚体	1480	ng/ml	0-115	H	2015-05-16 10:47:34	*葡萄糖	4.94	mmol/l	3.89-6.11	M	2015-05-16 10:31:43	C反应蛋白	1.14	mg/l	0-8	M	2015-05-16 10:49:22	凝血酶原时间(PT)	11.1	S	42992	M	2015-05-16 10:47:34
403	1000159332003	凝血酶原国际比值	0.9		0.7-1.3	M	2014-09-12 10:24:14	低密度脂蛋白	2.95	mmol/l	健康人群:1.8-3.36;心脑血管疾病危险人群:<2.59	M	2014-09-12 09:02:15	部分凝血活酶时间	36.4	S	22-45	M	2014-09-12 10:27:50	*总胆固醇	5.43	mmol/l	3.6-5.17	H	2014-09-12 09:02:15	D二聚体	787	ng/ml	0-115	H	2014-09-12 09:15:42	*葡萄糖	13.39	mmol/l	3.89-6.11	H	2014-09-12 09:02:15	C反应蛋白	3.46	mg/l	0-8	M	2014-09-12 09:02:15	凝血酶原时间(PT)	11.9	S	43023	M	2014-09-12 10:24:14
404	1000159578002	凝血酶原国际比值	0.98		0.7-1.3	M	2015-10-27 11:44:50	低密度脂蛋白	1.65	mmol/l	健康人群:1.8-3.36;心脑血管疾病危险人群:<2.59	M	2015-10-27 09:16:12	部分凝血活酶时间	34.1	S	22-45	M	2015-10-27 11:44:50	*总胆固醇	3.41	mmol/l	3.6-5.17	L	2015-10-27 09:16:12	D二聚体	150	ng/ml	0-115	H	2015-10-27 11:44:50	*葡萄糖	4.53	mmol/l	3.89-6.11	M	2015-10-27 09:16:12	C反应蛋白	0.59	mg/l	0-8	M	2015-12-03 08:47:33	凝血酶原时间(PT)	11.3	S	42992	M	2015-10-27 11:44:50
405	1000159884002	凝血酶原国际比值	0.9		0.7-1.3	M	2015-03-10 11:31:45	低密度脂蛋白	4.61	mmol/l	健康人群:1.8-3.36;心脑血管疾病危险人群:<2.59	M	2015-03-10 11:07:51	部分凝血活酶时间	20.3	S	22-45	L	2015-03-10 11:31:45	*总胆固醇	7.31	mmol/l	3.6-5.17	H	2015-03-10 11:07:51	D二聚体	70	ng/ml	0-115	M	2015-03-10 11:31:45	*葡萄糖	6.17	mmol/l	3.89-6.11	H	2015-03-10 11:07:51	C反应蛋白	0.2	mg/l	0-8	M	2015-03-10 11:21:29	凝血酶原时间(PT)	10.3	S	42992	M	2015-03-10 11:31:45
406	1000160073003	凝血酶原国际比值	0.85		0.7-1.3	M	2014-10-11 10:44:06	低密度脂蛋白	2.75	mmol/l	健康人群:1.8-3.36;心脑血管疾病危险人群:<2.59	M	2014-10-11 10:12:52	部分凝血活酶时间	31.5	S	22-45	M	2014-10-11 10:41:55	*总胆固醇	5.15	mmol/l	3.6-5.17	M	2014-10-11 10:12:52	D二聚体	113	ng/ml	0-115	M	2014-10-11 10:29:01	*葡萄糖	7.25	mmol/l	3.89-6.11	H	2014-10-11 10:12:52	C反应蛋白	75.4	mg/l	0-8	H	2014-10-25 09:13:43	凝血酶原时间(PT)	11.2	S	43023	M	2014-10-11 10:44:06
407	1000160073004	凝血酶原国际比值	0.95		0.7-1.3	M	2016-02-17 11:25:00	低密度脂蛋白	2.1	mmol/l	健康人群:1.8-3.36;心脑血管疾病危险人群:<2.59	M	2016-02-17 10:55:01	部分凝血活酶时间	24	S	22-45	M	2016-02-17 11:25:00	*总胆固醇	4.86	mmol/l	3.6-5.17	M	2016-02-17 10:55:01	D二聚体	60	ng/ml	0-115	M	2016-02-17 11:25:00	*葡萄糖	8.96	mmol/l	3.89-6.11	H	2016-02-17 10:55:01	C反应蛋白	3.7	mg/l	0-8	M	2016-02-28 09:43:47	凝血酶原时间(PT)	10.9	S	42992	M	2016-02-17 11:25:00
408	1000160209002	凝血酶原国际比值	0.96		0.7-1.3	M	2015-12-30 10:53:49	低密度脂蛋白	1.9	mmol/l	健康人群:1.8-3.36;心脑血管疾病危险人群:<2.59	M	2015-12-30 09:04:55	部分凝血活酶时间	29.9	S	22-45	M	2015-12-30 10:53:49	*总胆固醇	3.87	mmol/l	3.6-5.17	M	2015-12-30 09:04:55	D二聚体	40	ng/ml	0-115	M	2015-12-30 10:53:49	*葡萄糖	5.03	mmol/l	3.89-6.11	M	2015-12-30 09:04:55	C反应蛋白	0.89	mg/l	0-8	M	2015-12-30 09:04:55	凝血酶原时间(PT)	11	S	42992	M	2015-12-30 10:53:49
409	1000160209003	凝血酶原国际比值	1.06		0.7-1.3	M	2017-03-15 09:35:18	低密度脂蛋白	1.92	mmol/l	健康人群:1.8-3.36;心脑血管疾病危险人群:<2.59	M	2017-03-15 09:12:08	部分凝血活酶时间	27.8	S	20-40	M	2017-03-15 09:35:18	*总胆固醇	3.64	mmol/l	3.6-5.17	M	2017-03-15 09:12:08	D二聚体	100	ng/ml	0-115	M	2017-03-15 09:35:18	*葡萄糖	5.15	mmol/l	3.89-6.11	M	2017-03-15 09:12:08	C反应蛋白	0.01	mg/l	0-8	M	2017-03-15 09:12:08	凝血酶原时间(PT)	12.2	S	42992	M	2017-03-15 09:35:18
410	1000160392002	凝血酶原国际比值	0.99		0.7-1.3	M	2016-10-04 11:34:28	低密度脂蛋白	2.09	mmol/l	健康人群:1.8-3.36;心脑血管疾病危险人群:<2.59	M	2016-10-04 13:07:57	部分凝血活酶时间	27.1	S	20-40	M	2016-10-04 11:34:28	*总胆固醇	4.5	mmol/l	3.6-5.17	M	2016-10-04 13:07:57	D二聚体	260	ng/ml	0-115	H	2016-10-04 11:34:28	*葡萄糖	5.3	mmol/l	3.89-6.11	M	2016-10-04 13:07:57	C反应蛋白	1	mg/l	0-8	M	2016-10-04 13:07:57	凝血酶原时间(PT)	11.4	S	42992	M	2016-10-04 11:34:28
411	1000160971002	凝血酶原国际比值	0.97		0.7-1.3	M	2014-11-04 10:50:57	低密度脂蛋白	2.79	mmol/l	健康人群:1.8-3.36;心脑血管疾病危险人群:<2.59	M	2014-11-04 09:09:03	部分凝血活酶时间	27.2	S	22-45	M	2014-11-04 10:50:57	*总胆固醇	4.68	mmol/l	3.6-5.17	M	2014-11-04 09:09:03	D二聚体	90	ng/ml	0-115	M	2014-11-04 11:36:32	*葡萄糖	4.35	mmol/l	3.89-6.11	M	2014-11-04 09:09:03	C反应蛋白	0.74	mg/l	0-8	M	2014-11-04 09:09:03	凝血酶原时间(PT)	11.1	S	42992	M	2014-11-04 10:50:57
412	1000160988003	凝血酶原国际比值	0.97		0.7-1.3	M	2014-12-01 11:35:17	低密度脂蛋白	1.98	mmol/l	健康人群:1.8-3.36;心脑血管疾病危险人群:<2.59	M	2014-12-01 11:25:37	部分凝血活酶时间	21.8	S	22-45	L	2014-12-01 11:35:17	*总胆固醇	4.26	mmol/l	3.6-5.17	M	2014-12-01 11:25:37	D二聚体	60	ng/ml	0-115	M	2014-12-01 11:35:17	*葡萄糖	5.69	mmol/l	3.89-6.11	M	2014-12-01 11:25:37	C反应蛋白	0.52	mg/l	0-8	M	2014-12-01 11:25:37	凝血酶原时间(PT)	11.2	S	42992	M	2014-12-01 11:35:17
413	1000161055002	凝血酶原国际比值	0.89		0.7-1.3	M	2016-09-14 09:57:17	低密度脂蛋白	2.42	mmol/l	健康人群:1.8-3.36;心脑血管疾病危险人群:<2.59	M	2016-09-14 10:22:58	部分凝血活酶时间	25.7	S	20-40	M	2016-09-14 09:57:17	*总胆固醇	4.74	mmol/l	3.6-5.17	M	2016-09-14 10:22:58	D二聚体	530	ng/ml	0-115	H	2016-09-14 09:57:17	*葡萄糖	4.8	mmol/l	3.89-6.11	M	2016-09-14 10:22:58	C反应蛋白	58.31	mg/l	0-8	H	2016-09-14 10:22:58	凝血酶原时间(PT)	10.3	S	42992	M	2016-09-14 09:57:17
414	1000161296002	凝血酶原国际比值	1		0.7-1.3	M	2016-07-28 10:57:39	低密度脂蛋白	2.8	mmol/l	健康人群:1.8-3.36;心脑血管疾病危险人群:<2.59	M	2016-07-28 09:10:09	部分凝血活酶时间	29	S	20-40	M	2016-07-28 10:57:39	*总胆固醇	4.71	mmol/l	3.6-5.17	M	2016-07-28 09:10:09	D二聚体	90	ng/ml	0-115	M	2016-07-28 10:57:39	*葡萄糖	4.57	mmol/l	3.89-6.11	M	2016-07-28 09:10:09	C反应蛋白	0.2	mg/l	0-8	M	2016-07-28 09:10:09	凝血酶原时间(PT)	11.5	S	42992	M	2016-07-28 10:57:39
415	1000161509003	凝血酶原国际比值	0.91		0.7-1.3	M	2015-05-27 10:58:37	低密度脂蛋白	2.81	mmol/l	健康人群:1.8-3.36;心脑血管疾病危险人群:<2.59	M	2015-05-27 10:29:12	部分凝血活酶时间	29.3	S	22-45	M	2015-05-27 10:58:37	*总胆固醇	4.61	mmol/l	3.6-5.17	M	2015-05-27 10:29:12	D二聚体	990	ng/ml	0-115	H	2015-05-27 10:58:37	*葡萄糖	4.76	mmol/l	3.89-6.11	M	2015-05-27 10:29:12	C反应蛋白	3.69	mg/l	0-8	M	2015-05-27 10:29:12	凝血酶原时间(PT)	10.5	S	42992	M	2015-05-27 10:58:37
416	1000162135002	凝血酶原国际比值	0.87		0.7-1.3	M	2016-04-07 10:31:20	低密度脂蛋白	4.7	mmol/l	健康人群:1.8-3.36;心脑血管疾病危险人群:<2.59	M	2016-04-07 11:04:08	部分凝血活酶时间	24.8	S	22-45	M	2016-04-07 10:31:20	*总胆固醇	7.76	mmol/l	3.6-5.17	H	2016-04-07 11:04:08	D二聚体	89	ng/ml	0-115	M	2016-04-07 10:31:20	*葡萄糖	4.82	mmol/l	3.89-6.11	M	2016-04-07 11:04:08	C反应蛋白	0.76	mg/l	0-8	M	2016-04-07 10:13:36	凝血酶原时间(PT)	10	S	42992	M	2016-04-07 10:31:20
417	1000162990002	凝血酶原国际比值	1.07		0.7-1.3	M	2014-11-05 09:40:36	低密度脂蛋白	2.48	mmol/l	健康人群:1.8-3.36;心脑血管疾病危险人群:<2.59	M	2014-11-05 09:49:26	部分凝血活酶时间	33.6	S	22-45	M	2014-11-05 09:40:36	*总胆固醇	4.28	mmol/l	3.6-5.17	M	2014-11-05 09:49:26	D二聚体	80	ng/ml	0-115	M	2014-11-05 09:40:36	*葡萄糖	4.4	mmol/l	3.89-6.11	M	2014-11-05 09:49:26	C反应蛋白	15.78	mg/l	0-8	H	2014-11-05 09:49:26	凝血酶原时间(PT)	12.3	S	42992	M	2014-11-05 09:40:36
418	1000163441003	凝血酶原国际比值	0.87		0.7-1.3	M	2015-04-08 09:21:14	低密度脂蛋白	2.97	mmol/l	健康人群:1.8-3.36;心脑血管疾病危险人群:<2.59	M	2015-04-08 08:56:22	部分凝血活酶时间	29.9	S	22-45	M	2015-04-08 09:21:14	*总胆固醇	5.34	mmol/l	3.6-5.17	H	2015-04-08 08:56:22	D二聚体	110	ng/ml	0-115	M	2015-04-08 09:21:14	*葡萄糖	4.95	mmol/l	3.89-6.11	M	2015-04-08 08:56:22	C反应蛋白	9.36	mg/l	0-8	H	2015-04-08 08:50:43	凝血酶原时间(PT)	10	S	42992	M	2015-04-08 09:21:14
419	1000163441004	凝血酶原国际比值	0.94		0.7-1.3	M	2016-10-25 09:37:59	低密度脂蛋白	2.2	mmol/l	健康人群:1.8-3.36;心脑血管疾病危险人群:<2.59	M	2016-10-25 09:42:07	部分凝血活酶时间	27.7	S	20-40	M	2016-10-25 09:37:59	*总胆固醇	4	mmol/l	3.6-5.17	M	2016-10-25 09:42:07	D二聚体	170	ng/ml	0-115	H	2016-10-25 09:37:59	*葡萄糖	4.21	mmol/l	3.89-6.11	M	2016-10-25 09:42:07	C反应蛋白	5.02	mg/l	0-8	M	2016-10-25 09:42:07	凝血酶原时间(PT)	10.8	S	42992	M	2016-10-25 09:37:59
420	1000163502002	凝血酶原国际比值	0.88		0.7-1.3	M	2017-02-26 10:51:39	低密度脂蛋白	3.17	mmol/l	健康人群:1.8-3.36;心脑血管疾病危险人群:<2.59	M	2017-02-26 10:32:56	部分凝血活酶时间	21.7	S	20-40	M	2017-02-26 10:51:39	*总胆固醇	6.56	mmol/l	3.6-5.17	H	2017-02-26 10:32:56	D二聚体	160	ng/ml	0-115	H	2017-02-26 10:51:39	*葡萄糖	7.53	mmol/l	3.89-6.11	H	2017-02-26 10:32:56	C反应蛋白	1.66	mg/l	0-8	M	2017-02-26 10:32:56	凝血酶原时间(PT)	10.1	S	42992	M	2017-02-26 10:51:39
421	1000163615002	凝血酶原国际比值	0.87		0.7-1.3	M	2014-11-03 15:56:41	低密度脂蛋白	2.28	mmol/l	健康人群:1.8-3.36;心脑血管疾病危险人群:<2.59	M	2014-10-30 11:33:04	部分凝血活酶时间	30.3	S	22-45	M	2014-11-03 15:50:04	*总胆固醇	4.09	mmol/l	3.6-5.17	M	2014-10-30 11:33:04	D二聚体	657	ng/ml	0-115	H	2014-11-03 15:42:17	*葡萄糖	19.87	mmol/l	3.89-6.11	H	2014-10-30 11:33:04	C反应蛋白	14.6	mg/l	0-8	H	2014-10-30 11:33:04	凝血酶原时间(PT)	11.5	S	43023	M	2014-11-03 15:56:41
422	1000163972003	凝血酶原国际比值	0.97		0.7-1.3	M	2014-09-24 11:45:47	低密度脂蛋白	2.57	mmol/l	健康人群:1.8-3.36;心脑血管疾病危险人群:<2.59	M	2014-09-24 09:42:14	部分凝血活酶时间	23.9	S	22-45	M	2014-09-24 11:50:35	*总胆固醇	4.52	mmol/l	3.6-5.17	M	2014-09-24 09:42:14	D二聚体	1220	ng/ml	0-115	H	2014-09-24 11:45:47	*葡萄糖	5.04	mmol/l	3.89-6.11	M	2014-09-24 09:42:14	C反应蛋白	32.06	mg/l	0-8	H	2014-10-04 11:26:52	凝血酶原时间(PT)	11.1	S	42992	M	2014-09-24 11:45:47
423	1000164150006	凝血酶原国际比值	1		0.7-1.3	M	2017-02-07 10:37:18	低密度脂蛋白	2.68	mmol/l	健康人群:1.8-3.36;心脑血管疾病危险人群:<2.59	M	2017-02-07 10:31:07	部分凝血活酶时间	30.2	S	20-40	M	2017-02-07 10:37:18	*总胆固醇	4.69	mmol/l	3.6-5.17	M	2017-02-07 10:31:07	D二聚体	800	ng/ml	0-115	H	2017-02-07 10:37:18	*葡萄糖	5.27	mmol/l	3.89-6.11	M	2017-02-07 10:31:07	C反应蛋白	19.4	mg/l	0-8	H	2017-02-07 10:34:03	凝血酶原时间(PT)	11.5	S	42992	M	2017-02-07 10:37:18
424	1000164706002	凝血酶原国际比值	1.24		0.7-1.3	M	2016-11-23 10:27:58	低密度脂蛋白	2.4	mmol/l	健康人群:1.8-3.36;心脑血管疾病危险人群:<2.59	M	2016-11-23 09:56:13	部分凝血活酶时间	36	S	20-40	M	2016-11-23 10:29:54	*总胆固醇	4.05	mmol/l	3.6-5.17	M	2016-11-23 09:56:13	D二聚体	2114	ng/ml	0-115	H	2016-11-23 11:00:19	*葡萄糖	4.96	mmol/l	3.89-6.11	M	2016-11-23 09:56:13	C反应蛋白	52.3	mg/l	0-8	H	2016-11-23 09:56:13	凝血酶原时间(PT)	15.3	S	43023	H	2016-11-23 10:27:58
425	1000164823002	凝血酶原国际比值	0.9		0.7-1.3	M	2014-11-05 10:09:26	低密度脂蛋白	2.17	mmol/l	健康人群:1.8-3.36;心脑血管疾病危险人群:<2.59	M	2014-11-05 11:15:13	部分凝血活酶时间	31.4	S	22-45	M	2014-11-05 10:05:14	*总胆固醇	4.09	mmol/l	3.6-5.17	M	2014-11-05 11:15:13	D二聚体	486	ng/ml	0-115	H	2014-11-05 10:58:11	*葡萄糖	7.67	mmol/l	3.89-6.11	H	2014-11-05 11:15:13	C反应蛋白	46.27	mg/l	0-8	H	2014-11-05 11:15:13	凝血酶原时间(PT)	11.8	S	43023	M	2014-11-05 10:09:26
426	1000165342002	凝血酶原国际比值	1.05		0.7-1.3	M	2016-06-26 10:54:59	低密度脂蛋白	2.34	mmol/l	健康人群:1.8-3.36;心脑血管疾病危险人群:<2.59	M	2016-06-26 10:45:58	部分凝血活酶时间	28	S	20-40	M	2016-06-26 10:54:59	*总胆固醇	4.7	mmol/l	3.6-5.17	M	2016-06-26 10:45:58	D二聚体	270	ng/ml	0-115	H	2016-06-26 10:54:59	*葡萄糖	5	mmol/l	3.89-6.11	M	2016-06-26 10:45:58	C反应蛋白	29.3	mg/l	0-8	H	2016-06-26 10:44:17	凝血酶原时间(PT)	12.1	S	42992	M	2016-06-26 10:54:59
427	1000165888002	凝血酶原国际比值	0.95		0.7-1.3	M	2014-11-05 10:09:31	低密度脂蛋白	2.42	mmol/l	健康人群:1.8-3.36;心脑血管疾病危险人群:<2.59	M	2014-11-05 10:25:53	部分凝血活酶时间	34.9	S	22-45	M	2014-11-05 10:05:19	*总胆固醇	4.77	mmol/l	3.6-5.17	M	2014-11-05 09:49:05	D二聚体	93	ng/ml	0-115	M	2014-11-05 11:07:29	*葡萄糖	4.81	mmol/l	3.89-6.11	M	2014-11-05 09:49:05	C反应蛋白	0.96	mg/l	0-8	M	2014-11-05 09:49:04	凝血酶原时间(PT)	12.5	S	43023	M	2014-11-05 10:09:31
428	1000166774002	凝血酶原国际比值	0.88		0.7-1.3	M	2015-10-08 10:22:12	低密度脂蛋白	3.49	mmol/l	健康人群:1.8-3.36;心脑血管疾病危险人群:<2.59	M	2015-10-08 10:57:03	部分凝血活酶时间	31.6	S	22-45	M	2015-10-08 10:26:34	*总胆固醇	6.32	mmol/l	3.6-5.17	H	2015-10-08 10:57:03	D二聚体	352	ng/ml	0-115	H	2015-10-08 10:21:22	*葡萄糖	5.57	mmol/l	3.89-6.11	M	2015-10-08 10:57:03	C反应蛋白	2.22	mg/l	0-8	M	2015-10-08 10:57:03	凝血酶原时间(PT)	11.6	S	43023	M	2015-10-08 10:22:12
429	1000167136003	凝血酶原国际比值	0.96		0.7-1.3	M	2015-10-27 14:17:28	低密度脂蛋白	2.7	mmol/l	健康人群:1.8-3.36;心脑血管疾病危险人群:<2.59	M	2015-10-27 14:10:37	部分凝血活酶时间	36.2	S	22-45	M	2015-10-27 14:17:28	*总胆固醇	5.31	mmol/l	3.6-5.17	H	2015-10-27 14:10:37	D二聚体	900	ng/ml	0-115	H	2015-10-27 14:21:23	*葡萄糖	5.1	mmol/l	3.89-6.11	M	2015-10-27 14:10:37	C反应蛋白	135.54	mg/l	0-8	H	2015-10-28 09:08:57	凝血酶原时间(PT)	11	S	42992	M	2015-10-27 14:17:28
430	1000167331003	凝血酶原国际比值	1.27		0.7-1.3	M	2015-11-02 11:23:39	低密度脂蛋白	3.18	mmol/l	健康人群:1.8-3.36;心脑血管疾病危险人群:<2.59	M	2015-11-02 11:48:53	部分凝血活酶时间	26.3	S	22-45	M	2015-11-02 11:23:39	*总胆固醇	5.66	mmol/l	3.6-5.17	H	2015-11-02 11:48:54	D二聚体	20	ng/ml	0-115	M	2015-11-02 11:23:39	*葡萄糖	6.13	mmol/l	3.89-6.11	H	2015-11-02 11:48:53	C反应蛋白	15.03	mg/l	0-8	H	2015-11-02 11:48:53	凝血酶原时间(PT)	14.5	S	42992	H	2015-11-02 11:23:39
431	1000167888003	凝血酶原国际比值	1.02		0.7-1.3	M	2016-07-12 09:34:20	低密度脂蛋白	1.56	mmol/l	健康人群:1.8-3.36;心脑血管疾病危险人群:<2.59	M	2016-07-12 09:33:50	部分凝血活酶时间	29.2	S	20-40	M	2016-07-12 09:34:20	*总胆固醇	3.84	mmol/l	3.6-5.17	M	2016-07-12 09:33:50	D二聚体	170	ng/ml	0-115	H	2016-07-12 09:34:20	*葡萄糖	4.95	mmol/l	3.89-6.11	M	2016-07-12 09:33:50	C反应蛋白	0.8	mg/l	0-8	M	2016-07-12 09:33:50	凝血酶原时间(PT)	11.7	S	42992	M	2016-07-12 09:34:20
432	1000167982002	凝血酶原国际比值	1.08		0.7-1.3	M	2017-03-07 09:37:06	低密度脂蛋白	3.25	mmol/l	健康人群:1.8-3.36;心脑血管疾病危险人群:<2.59	M	2017-03-07 10:27:44	部分凝血活酶时间	27.9	S	20-40	M	2017-03-07 09:37:06	*总胆固醇	5.02	mmol/l	3.6-5.17	M	2017-03-07 10:27:44	D二聚体	240	ng/ml	0-115	H	2017-03-07 09:37:06	*葡萄糖	5.61	mmol/l	3.89-6.11	M	2017-03-07 10:27:44	C反应蛋白	4.72	mg/l	0-8	M	2017-03-07 10:27:44	凝血酶原时间(PT)	12.4	S	42992	M	2017-03-07 09:37:06
433	1000168589002	凝血酶原国际比值	1.01		0.7-1.3	M	2017-01-18 10:07:40	低密度脂蛋白	3.66	mmol/l	健康人群:1.8-3.36;心脑血管疾病危险人群:<2.59	M	2017-01-18 09:40:36	部分凝血活酶时间	26.2	S	20-40	M	2017-01-18 10:07:40	*总胆固醇	5.78	mmol/l	3.6-5.17	H	2017-01-18 09:40:36	D二聚体	3820	ng/ml	0-115	H	2017-01-18 10:07:40	*葡萄糖	7.45	mmol/l	3.89-6.11	H	2017-01-18 09:40:36	C反应蛋白	51.05	mg/l	0-8	H	2017-01-18 09:40:36	凝血酶原时间(PT)	11.6	S	42992	M	2017-01-18 10:07:40
434	1000168605003	凝血酶原国际比值	1.09		0.7-1.3	M	2014-10-22 09:27:42	低密度脂蛋白	2.85	mmol/l	健康人群:1.8-3.36;心脑血管疾病危险人群:<2.59	M	2014-10-22 09:15:17	部分凝血活酶时间	30.8	S	22-45	M	2014-10-22 09:27:42	*总胆固醇	5.08	mmol/l	3.6-5.17	M	2014-10-22 09:15:17	D二聚体	70	ng/ml	0-115	M	2014-10-22 10:19:03	*葡萄糖	4.1	mmol/l	3.89-6.11	M	2014-10-22 09:15:17	C反应蛋白	65.2	mg/l	0-8	H	2014-10-28 18:30:03	凝血酶原时间(PT)	12.6	S	42992	M	2014-10-22 09:27:42
435	1000168793003	凝血酶原国际比值	0.82		0.7-1.3	M	2015-12-16 10:09:40	低密度脂蛋白	3.64	mmol/l	健康人群:1.8-3.36;心脑血管疾病危险人群:<2.59	M	2015-12-16 09:24:48	部分凝血活酶时间	34	S	22-45	M	2015-12-16 09:45:59	*总胆固醇	5.6	mmol/l	3.6-5.17	H	2015-12-16 09:24:48	D二聚体	267	ng/ml	0-115	H	2015-12-16 09:48:26	*葡萄糖	5.49	mmol/l	3.89-6.11	M	2015-12-16 09:24:48	C反应蛋白	21.46	mg/l	0-8	H	2015-12-16 09:24:48	凝血酶原时间(PT)	10.8	S	43023	M	2015-12-16 10:09:40
436	1000168793004	凝血酶原国际比值	0.97		0.7-1.3	M	2016-01-27 19:03:56	低密度脂蛋白	3.96	mmol/l	健康人群:1.8-3.36;心脑血管疾病危险人群:<2.59	M	2016-01-27 18:59:28	部分凝血活酶时间	35.1	S	22-45	M	2016-01-27 19:03:56	*总胆固醇	6.5	mmol/l	3.6-5.17	H	2016-01-27 18:59:28	D二聚体	100	ng/ml	0-115	M	2016-01-27 19:03:56	*葡萄糖	5	mmol/l	3.89-6.11	M	2016-01-27 18:59:28	C反应蛋白	22.4	mg/l	0-8	H	2016-01-27 18:59:28	凝血酶原时间(PT)	11.2	S	42992	M	2016-01-27 19:03:56
437	1000168793005	凝血酶原国际比值	0.93		0.7-1.3	M	2016-03-24 12:15:17	低密度脂蛋白	2.32	mmol/l	健康人群:1.8-3.36;心脑血管疾病危险人群:<2.59	M	2016-03-24 09:29:17	部分凝血活酶时间	30.9	S	22-45	M	2016-03-24 12:15:17	*总胆固醇	4.12	mmol/l	3.6-5.17	M	2016-03-24 09:29:17	D二聚体	150	ng/ml	0-115	H	2016-03-24 12:15:17	*葡萄糖	5.03	mmol/l	3.89-6.11	M	2016-03-24 09:29:17	C反应蛋白	17.55	mg/l	0-8	H	2016-03-24 09:29:17	凝血酶原时间(PT)	10.7	S	42992	M	2016-03-24 12:15:17
438	1000168793007	凝血酶原国际比值	0.86		0.7-1.3	M	2017-03-28 13:54:50	低密度脂蛋白	3.95	mmol/l	健康人群:1.8-3.36;心脑血管疾病危险人群:<2.59	M	2017-03-28 13:50:18	部分凝血活酶时间	25.4	S	20-40	M	2017-03-28 13:54:50	*总胆固醇	6.3	mmol/l	3.6-5.17	H	2017-03-28 13:50:18	D二聚体	160	ng/ml	0-115	H	2017-03-28 13:54:50	*葡萄糖	5.3	mmol/l	3.89-6.11	M	2017-03-28 13:50:17	C反应蛋白	14.6	mg/l	0-8	H	2017-03-28 13:50:18	凝血酶原时间(PT)	9.9	S	42992	M	2017-03-28 13:54:50
439	1000169555002	凝血酶原国际比值	0.98		0.7-1.3	M	2016-06-30 13:58:32	低密度脂蛋白	2.76	mmol/l	健康人群:1.8-3.36;心脑血管疾病危险人群:<2.59	M	2016-06-30 13:09:57	部分凝血活酶时间	24.5	S	20-40	M	2016-06-30 13:58:32	*总胆固醇	4.5	mmol/l	3.6-5.17	M	2016-06-30 13:09:57	D二聚体	370	ng/ml	0-115	H	2016-06-30 13:58:32	*葡萄糖	5.3	mmol/l	3.89-6.11	M	2016-06-30 13:09:57	C反应蛋白	1	mg/l	0-8	M	2016-06-30 13:17:55	凝血酶原时间(PT)	11.3	S	42992	M	2016-06-30 13:58:32
440	1000169555003	凝血酶原国际比值	0.98		0.7-1.3	M	2016-10-11 12:43:31	低密度脂蛋白	1.91	mmol/l	健康人群:1.8-3.36;心脑血管疾病危险人群:<2.59	M	2016-10-11 11:10:24	部分凝血活酶时间	25.7	S	20-40	M	2016-10-11 12:43:31	*总胆固醇	3.39	mmol/l	3.6-5.17	L	2016-10-11 11:10:24	D二聚体	780	ng/ml	0-115	H	2016-10-11 12:43:31	*葡萄糖	5.93	mmol/l	3.89-6.11	M	2016-10-11 11:10:24	C反应蛋白	1.14	mg/l	0-8	M	2016-10-11 11:41:17	凝血酶原时间(PT)	11.3	S	42992	M	2016-10-11 12:43:31
441	1000169851005	凝血酶原国际比值	0.98		0.7-1.3	M	2015-10-19 11:05:58	低密度脂蛋白	0.91	mmol/l	健康人群:1.8-3.36;心脑血管疾病危险人群:<2.59	M	2015-10-19 09:54:59	部分凝血活酶时间	44.5	S	22-45	M	2015-10-19 10:25:45	*总胆固醇	3.38	mmol/l	3.6-5.17	L	2015-10-19 09:54:59	D二聚体	1628	ng/ml	0-115	H	2015-10-19 10:51:31	*葡萄糖	7.82	mmol/l	3.89-6.11	H	2015-10-19 09:54:59	C反应蛋白	61.47	mg/l	0-8	H	2015-10-22 08:58:26	凝血酶原时间(PT)	12.9	S	43023	M	2015-10-19 11:05:58
442	1000169964002	凝血酶原国际比值	1.01		0.7-1.3	M	2014-11-03 10:40:52	低密度脂蛋白	1.72	mmol/l	健康人群:1.8-3.36;心脑血管疾病危险人群:<2.59	M	2014-11-03 08:47:31	部分凝血活酶时间	28.1	S	22-45	M	2014-11-03 10:40:52	*总胆固醇	3.53	mmol/l	3.6-5.17	L	2014-11-03 08:47:31	D二聚体	30	ng/ml	0-115	M	2014-11-03 10:40:52	*葡萄糖	5.51	mmol/l	3.89-6.11	M	2014-11-03 08:47:31	C反应蛋白	34.44	mg/l	0-8	H	2014-11-08 09:33:47	凝血酶原时间(PT)	11.6	S	42992	M	2014-11-03 10:40:52
443	1000170458002	凝血酶原国际比值	0.96		0.7-1.3	M	2016-11-11 13:51:48	低密度脂蛋白	2.42	mmol/l	健康人群:1.8-3.36;心脑血管疾病危险人群:<2.59	M	2016-11-11 13:58:18	部分凝血活酶时间	29.7	S	20-40	M	2016-11-11 13:51:48	*总胆固醇	4.9	mmol/l	3.6-5.17	M	2016-11-11 13:58:18	D二聚体	89	ng/ml	0-115	M	2016-11-11 13:51:48	*葡萄糖	4.7	mmol/l	3.89-6.11	M	2016-11-11 13:58:18	C反应蛋白	8.75	mg/l	0-8	H	2016-11-18 09:58:04	凝血酶原时间(PT)	11.1	S	42992	M	2016-11-11 13:51:48
444	1000170526002	凝血酶原国际比值	0.88		0.7-1.3	M	2015-05-02 11:34:58	低密度脂蛋白	3.01	mmol/l	健康人群:1.8-3.36;心脑血管疾病危险人群:<2.59	M	2015-05-02 11:30:51	部分凝血活酶时间	32.5	S	22-45	M	2015-05-02 11:13:13	*总胆固醇	5.63	mmol/l	3.6-5.17	H	2015-05-02 11:30:51	D二聚体	113	ng/ml	0-115	M	2015-05-02 11:17:54	*葡萄糖	4.99	mmol/l	3.89-6.11	M	2015-05-02 11:30:51	C反应蛋白	0.91	mg/l	0-8	M	2015-05-02 11:30:51	凝血酶原时间(PT)	11.6	S	43023	M	2015-05-02 11:34:58
445	1000170540003	凝血酶原国际比值	0.92		0.7-1.3	M	2015-08-25 11:11:45	低密度脂蛋白	2.71	mmol/l	健康人群:1.8-3.36;心脑血管疾病危险人群:<2.59	M	2015-08-25 09:20:15	部分凝血活酶时间	30	S	22-45	M	2015-08-25 11:15:22	*总胆固醇	5.34	mmol/l	3.6-5.17	H	2015-08-25 09:20:15	D二聚体	322	ng/ml	0-115	H	2015-08-25 10:16:30	*葡萄糖	4.9	mmol/l	3.89-6.11	M	2015-08-25 09:20:15	C反应蛋白	12.1	mg/l	0-8	H	2015-08-25 09:20:15	凝血酶原时间(PT)	12.1	S	43023	M	2015-08-25 11:11:45
446	1000170782002	凝血酶原国际比值	1.12		0.7-1.3	M	2016-03-17 10:30:45	低密度脂蛋白	1.84	mmol/l	健康人群:1.8-3.36;心脑血管疾病危险人群:<2.59	M	2016-03-17 08:59:52	部分凝血活酶时间	32.5	S	22-45	M	2016-03-17 10:30:45	*总胆固醇	3.37	mmol/l	3.6-5.17	L	2016-03-17 08:59:52	D二聚体	80	ng/ml	0-115	M	2016-03-17 10:30:45	*葡萄糖	10.77	mmol/l	3.89-6.11	H	2016-03-17 08:59:52	C反应蛋白	40.89	mg/l	0-8	H	2016-03-17 08:59:52	凝血酶原时间(PT)	12.9	S	42992	M	2016-03-17 10:30:45
447	1000171119002	凝血酶原国际比值	0.97		0.7-1.3	M	2014-12-02 10:54:40	低密度脂蛋白	3.07	mmol/l	健康人群:1.8-3.36;心脑血管疾病危险人群:<2.59	M	2014-12-02 10:40:37	部分凝血活酶时间	22.9	S	22-45	M	2014-12-02 10:54:40	*总胆固醇	4.87	mmol/l	3.6-5.17	M	2014-12-02 10:40:37	D二聚体	80	ng/ml	0-115	M	2014-12-02 10:54:40	*葡萄糖	5.88	mmol/l	3.89-6.11	M	2014-12-02 10:40:37	C反应蛋白	54.2	mg/l	0-8	H	2014-12-04 22:29:36	凝血酶原时间(PT)	11.2	S	42992	M	2014-12-02 10:54:40
448	1000171129002	凝血酶原国际比值	0.84		0.7-1.3	M	2015-04-02 09:10:32	低密度脂蛋白	2.98	mmol/l	健康人群:1.8-3.36;心脑血管疾病危险人群:<2.59	M	2015-04-02 09:18:19	部分凝血活酶时间	26.3	S	22-45	M	2015-04-02 09:10:32	*总胆固醇	4.84	mmol/l	3.6-5.17	M	2015-04-02 09:18:19	D二聚体	470	ng/ml	0-115	H	2015-04-02 09:10:32	*葡萄糖	5.69	mmol/l	3.89-6.11	M	2015-04-02 09:18:19	C反应蛋白	1.88	mg/l	0-8	M	2015-04-02 09:18:19	凝血酶原时间(PT)	9.7	S	42992	M	2015-04-02 09:10:32
449	1000171369002	凝血酶原国际比值	1.18		0.7-1.3	M	2016-03-24 11:42:53	低密度脂蛋白	3.35	mmol/l	健康人群:1.8-3.36;心脑血管疾病危险人群:<2.59	M	2016-03-24 10:34:58	部分凝血活酶时间	42.2	S	22-45	M	2016-03-24 11:45:33	*总胆固醇	5.11	mmol/l	3.6-5.17	M	2016-03-24 10:34:58	D二聚体	890	ng/ml	0-115	H	2016-03-24 11:42:53	*葡萄糖	9.39	mmol/l	3.89-6.11	H	2016-03-24 10:34:58	C反应蛋白	39	mg/l	0-8	H	2016-03-25 19:30:43	凝血酶原时间(PT)	13.5	S	42992	M	2016-03-24 11:42:53
450	1000171517005	凝血酶原国际比值	0.99		0.7-1.3	M	2016-04-14 10:59:18	低密度脂蛋白	1.92	mmol/l	健康人群:1.8-3.36;心脑血管疾病危险人群:<2.59	M	2016-04-14 11:15:16	部分凝血活酶时间	26.5	S	22-45	M	2016-04-14 10:59:18	*总胆固醇	4.23	mmol/l	3.6-5.17	M	2016-04-14 11:15:16	D二聚体	10	ng/ml	0-115	M	2016-04-14 10:59:18	*葡萄糖	4.99	mmol/l	3.89-6.11	M	2016-04-14 11:15:16	C反应蛋白	4.52	mg/l	0-8	M	2016-04-14 11:15:16	凝血酶原时间(PT)	11.4	S	42992	M	2016-04-14 10:59:18
451	1000172229002	凝血酶原国际比值	0.94		0.7-1.3	M	2015-01-29 11:45:51	低密度脂蛋白	2.49	mmol/l	健康人群:1.8-3.36;心脑血管疾病危险人群:<2.59	M	2015-01-29 10:25:58	部分凝血活酶时间	31.5	S	22-45	M	2015-01-29 11:36:03	*总胆固醇	4.73	mmol/l	3.6-5.17	M	2015-01-29 10:25:58	D二聚体	95	ng/ml	0-115	M	2015-01-29 10:17:44	*葡萄糖	10.79	mmol/l	3.89-6.11	H	2015-01-29 10:25:58	C反应蛋白	0.5	mg/l	0-8	M	2015-01-29 10:36:13	凝血酶原时间(PT)	12.4	S	43023	M	2015-01-29 11:45:51
452	1000172289002	凝血酶原国际比值	1.07		0.7-1.3	M	2016-11-09 10:39:52	低密度脂蛋白	1.81	mmol/l	健康人群:1.8-3.36;心脑血管疾病危险人群:<2.59	M	2016-11-09 09:15:26	部分凝血活酶时间	33.8	S	20-40	M	2016-11-09 10:39:52	*总胆固醇	3.32	mmol/l	3.6-5.17	L	2016-11-09 09:15:26	D二聚体	190	ng/ml	0-115	H	2016-11-09 10:39:52	*葡萄糖	4.22	mmol/l	3.89-6.11	M	2016-11-09 09:15:26	C反应蛋白	0.99	mg/l	0-8	M	2016-11-09 09:15:26	凝血酶原时间(PT)	12.3	S	42992	M	2016-11-09 10:39:52
453	1000172289003	凝血酶原国际比值	1.04		0.7-1.3	M	2017-02-04 10:38:37	低密度脂蛋白	2.49	mmol/l	健康人群:1.8-3.36;心脑血管疾病危险人群:<2.59	M	2017-02-04 09:12:05	部分凝血活酶时间	34.3	S	20-40	M	2017-02-04 10:38:37	*总胆固醇	4.28	mmol/l	3.6-5.17	M	2017-02-04 09:12:05	D二聚体	220	ng/ml	0-115	H	2017-02-04 10:38:37	*葡萄糖	5.7	mmol/l	3.89-6.11	M	2017-02-04 09:12:05	C反应蛋白	11.5	mg/l	0-8	H	2017-03-12 09:26:49	凝血酶原时间(PT)	11.9	S	42992	M	2017-02-04 10:38:37
454	1000172344003	凝血酶原国际比值	0.92		0.7-1.3	M	2015-04-18 09:53:42	低密度脂蛋白	2.66	mmol/l	健康人群:1.8-3.36;心脑血管疾病危险人群:<2.59	M	2015-04-18 09:35:00	部分凝血活酶时间	38.7	S	22-45	M	2015-04-18 09:49:55	*总胆固醇	4.27	mmol/l	3.6-5.17	M	2015-04-18 09:35:00	D二聚体	507	ng/ml	0-115	H	2015-04-18 10:10:06	*葡萄糖	4.56	mmol/l	3.89-6.11	M	2015-04-18 09:35:00	C反应蛋白	18.76	mg/l	0-8	H	2015-04-18 09:35:00	凝血酶原时间(PT)	12.1	S	43023	M	2015-04-18 09:53:42
455	1000172474003	凝血酶原国际比值	1.01		0.7-1.3	M	2014-11-15 10:38:01	低密度脂蛋白	2.87	mmol/l	健康人群:1.8-3.36;心脑血管疾病危险人群:<2.59	M	2014-11-15 10:17:00	部分凝血活酶时间	30.2	S	22-45	M	2014-11-15 10:38:01	*总胆固醇	5.19	mmol/l	3.6-5.17	H	2014-11-15 10:17:00	D二聚体	300	ng/ml	0-115	H	2014-11-15 10:38:01	*葡萄糖	5.11	mmol/l	3.89-6.11	M	2014-11-15 10:17:00	C反应蛋白	7.45	mg/l	0-8	M	2014-11-15 10:17:00	凝血酶原时间(PT)	11.6	S	42992	M	2014-11-15 10:38:01
456	1000172499002	凝血酶原国际比值	0.98		0.7-1.3	M	2016-06-01 11:58:58	低密度脂蛋白	1.27	mmol/l	健康人群:1.8-3.36;心脑血管疾病危险人群:<2.59	M	2016-06-01 09:04:08	部分凝血活酶时间	27	S	22-45	M	2016-06-01 11:58:58	*总胆固醇	3.11	mmol/l	3.6-5.17	L	2016-06-01 09:04:08	D二聚体	3480	ng/ml	0-115	H	2016-06-01 11:58:58	*葡萄糖	5.77	mmol/l	3.89-6.11	M	2016-06-01 09:04:08	C反应蛋白	128.94	mg/l	0-8	H	2016-06-01 09:04:08	凝血酶原时间(PT)	11.3	S	42992	M	2016-06-01 11:58:58
457	1000172755003	凝血酶原国际比值	0.89		0.7-1.3	M	2016-03-12 10:18:54	低密度脂蛋白	2.23	mmol/l	健康人群:1.8-3.36;心脑血管疾病危险人群:<2.59	M	2016-03-12 09:08:58	部分凝血活酶时间	28	S	22-45	M	2016-03-12 10:18:54	*总胆固醇	4.15	mmol/l	3.6-5.17	M	2016-03-12 09:08:58	D二聚体	100	ng/ml	0-115	M	2016-03-12 10:18:54	*葡萄糖	8.02	mmol/l	3.89-6.11	H	2016-03-12 09:08:58	C反应蛋白	11.6	mg/l	0-8	H	2016-03-12 09:08:58	凝血酶原时间(PT)	10.3	S	42992	M	2016-03-12 10:18:54
458	1000173116002	凝血酶原国际比值	0.94		0.7-1.3	M	2016-10-17 16:30:10	低密度脂蛋白	2.95	mmol/l	健康人群:1.8-3.36;心脑血管疾病危险人群:<2.59	M	2016-10-17 15:29:43	部分凝血活酶时间	28.2	S	20-40	M	2016-10-17 16:30:10	*总胆固醇	5.7	mmol/l	3.6-5.17	H	2016-10-17 15:29:43	D二聚体	89	ng/ml	0-115	M	2016-10-17 16:30:10	*葡萄糖	4.9	mmol/l	3.89-6.11	M	2016-10-17 15:29:43	C反应蛋白	3.8	mg/l	0-8	M	2016-10-17 15:29:43	凝血酶原时间(PT)	10.8	S	42992	M	2016-10-17 16:30:10
459	1000173309002	凝血酶原国际比值	0.97		0.7-1.3	M	2014-10-10 11:56:54	低密度脂蛋白	2.79	mmol/l	健康人群:1.8-3.36;心脑血管疾病危险人群:<2.59	M	2014-10-10 10:35:01	部分凝血活酶时间	23.8	S	22-45	M	2014-10-10 11:56:54	*总胆固醇	4.69	mmol/l	3.6-5.17	M	2014-10-10 10:35:01	D二聚体	40	ng/ml	0-115	M	2014-10-10 11:56:54	*葡萄糖	4.3	mmol/l	3.89-6.11	M	2014-10-10 10:35:01	C反应蛋白	0.23	mg/l	0-8	M	2014-10-10 10:39:27	凝血酶原时间(PT)	11.2	S	42992	M	2014-10-10 11:56:54
460	1000173992002	凝血酶原国际比值	0.93		0.7-1.3	M	2016-10-11 11:28:37	低密度脂蛋白	3.33	mmol/l	健康人群:1.8-3.36;心脑血管疾病危险人群:<2.59	M	2016-10-11 10:38:22	部分凝血活酶时间	23.3	S	20-40	M	2016-10-11 11:28:37	*总胆固醇	5.92	mmol/l	3.6-5.17	H	2016-10-11 10:38:22	D二聚体	130	ng/ml	0-115	H	2016-10-11 11:28:37	*葡萄糖	5.71	mmol/l	3.89-6.11	M	2016-10-11 10:38:22	C反应蛋白	1.56	mg/l	0-8	M	2016-10-11 10:38:22	凝血酶原时间(PT)	10.7	S	42992	M	2016-10-11 11:28:37
461	1000173992003	凝血酶原国际比值	0.95		0.7-1.3	M	2017-01-01 10:43:18	低密度脂蛋白	2.5	mmol/l	健康人群:1.8-3.36;心脑血管疾病危险人群:<2.59	M	2017-01-01 09:23:10	部分凝血活酶时间	23.5	S	20-40	M	2017-01-01 10:43:18	*总胆固醇	5.1	mmol/l	3.6-5.17	M	2017-01-01 09:23:10	D二聚体	530	ng/ml	0-115	H	2017-01-01 10:43:18	*葡萄糖	8.3	mmol/l	3.89-6.11	H	2017-01-01 09:23:10	C反应蛋白	9.5	mg/l	0-8	H	2017-01-01 09:23:11	凝血酶原时间(PT)	10.9	S	42992	M	2017-01-01 10:43:18
462	1000174000002	凝血酶原国际比值	0.88		0.7-1.3	M	2014-11-04 11:57:11	低密度脂蛋白	3.88	mmol/l	健康人群:1.8-3.36;心脑血管疾病危险人群:<2.59	M	2014-11-04 11:04:04	部分凝血活酶时间	30.1	S	22-45	M	2014-11-04 11:57:11	*总胆固醇	9.05	mmol/l	3.6-5.17	H	2014-11-04 11:04:04	D二聚体	160	ng/ml	0-115	H	2014-11-04 12:03:08	*葡萄糖	6.67	mmol/l	3.89-6.11	H	2014-11-04 11:04:04	C反应蛋白	4.51	mg/l	0-8	M	2014-11-04 11:04:04	凝血酶原时间(PT)	11.6	S	43023	M	2014-11-04 11:57:11
463	1000174347002	凝血酶原国际比值	0.86		0.7-1.3	M	2015-04-28 11:01:17	低密度脂蛋白	2.74	mmol/l	健康人群:1.8-3.36;心脑血管疾病危险人群:<2.59	M	2015-04-28 10:38:02	部分凝血活酶时间	27.8	S	22-45	M	2015-04-28 11:01:17	*总胆固醇	4.55	mmol/l	3.6-5.17	M	2015-04-28 10:38:02	D二聚体	60	ng/ml	0-115	M	2015-04-28 11:01:17	*葡萄糖	4.8	mmol/l	3.89-6.11	M	2015-04-28 10:38:02	C反应蛋白	3.22	mg/l	0-8	M	2015-04-28 10:38:03	凝血酶原时间(PT)	9.9	S	42992	M	2015-04-28 11:01:17
464	1000174362002	凝血酶原国际比值	0.93		0.7-1.3	M	2016-09-14 09:30:30	低密度脂蛋白	3.13	mmol/l	健康人群:1.8-3.36;心脑血管疾病危险人群:<2.59	M	2016-09-14 09:54:56	部分凝血活酶时间	30.7	S	20-40	M	2016-09-14 09:39:21	*总胆固醇	4.93	mmol/l	3.6-5.17	M	2016-09-14 09:54:56	D二聚体	426	ng/ml	0-115	H	2016-09-14 09:23:47	*葡萄糖	6.27	mmol/l	3.89-6.11	H	2016-09-14 09:54:56	C反应蛋白	0.1	mg/l	0-8	M	2016-09-14 09:54:56	凝血酶原时间(PT)	11.5	S	43023	M	2016-09-14 09:30:30
465	1000174407003	凝血酶原国际比值	0.97		0.7-1.3	M	2016-01-06 12:01:38	低密度脂蛋白	2.65	mmol/l	健康人群:1.8-3.36;心脑血管疾病危险人群:<2.59	M	2016-01-06 13:53:48	部分凝血活酶时间	26.4	S	22-45	M	2016-01-06 12:01:38	*总胆固醇	5.6	mmol/l	3.6-5.17	H	2016-01-06 13:53:48	D二聚体	980	ng/ml	0-115	H	2016-01-06 12:01:38	*葡萄糖	4.7	mmol/l	3.89-6.11	M	2016-01-06 13:53:48	C反应蛋白	1.1	mg/l	0-8	M	2016-01-06 13:53:49	凝血酶原时间(PT)	11.2	S	42992	M	2016-01-06 12:01:38
466	1000174856002	凝血酶原国际比值	0.9		0.7-1.3	M	2015-09-09 15:52:33	低密度脂蛋白	2.393	mmol/l	健康人群:1.8-3.36;心脑血管疾病危险人群:<2.59	M	2015-09-09 15:20:55	部分凝血活酶时间	35.3	S	22-45	M	2015-09-09 15:50:12	*总胆固醇	5	mmol/l	3.6-5.17	M	2015-09-09 15:20:55	D二聚体	181	ng/ml	0-115	H	2015-09-09 15:33:13	*葡萄糖	5.1	mmol/l	3.89-6.11	M	2015-09-09 15:20:55	C反应蛋白	48	mg/l	0-8	H	2015-09-09 15:20:55	凝血酶原时间(PT)	11.9	S	43023	M	2015-09-09 15:52:33
467	1000175003003	凝血酶原国际比值	0.93		0.7-1.3	M	2016-04-26 11:18:18	低密度脂蛋白	3.16	mmol/l	健康人群:1.8-3.36;心脑血管疾病危险人群:<2.59	M	2016-04-26 09:47:40	部分凝血活酶时间	26.6	S	22-45	M	2016-04-26 11:18:18	*总胆固醇	5.41	mmol/l	3.6-5.17	H	2016-04-26 09:47:40	D二聚体	2000	ng/ml	0-115	H	2016-04-26 11:18:18	*葡萄糖	4.96	mmol/l	3.89-6.11	M	2016-04-26 09:47:40	C反应蛋白	5.53	mg/l	0-8	M	2016-04-26 09:47:40	凝血酶原时间(PT)	10.7	S	42992	M	2016-04-26 11:18:18
468	1000175281003	凝血酶原国际比值	0.82		0.7-1.3	M	2017-03-20 11:29:12	低密度脂蛋白	4.11	mmol/l	健康人群:1.8-3.36;心脑血管疾病危险人群:<2.59	M	2017-03-20 12:10:41	部分凝血活酶时间	23.5	S	20-40	M	2017-03-20 11:29:12	*总胆固醇	6.53	mmol/l	3.6-5.17	H	2017-03-20 12:10:41	D二聚体	140	ng/ml	0-115	H	2017-03-20 11:29:13	*葡萄糖	5.29	mmol/l	3.89-6.11	M	2017-03-20 12:10:41	C反应蛋白	0.9	mg/l	0-8	M	2017-03-21 13:45:01	凝血酶原时间(PT)	9.5	S	42992	M	2017-03-20 11:29:12
469	1000175744002	凝血酶原国际比值	1.03		0.7-1.3	M	2016-09-27 12:49:32	低密度脂蛋白	4.19	mmol/l	健康人群:1.8-3.36;心脑血管疾病危险人群:<2.59	M	2016-09-27 11:45:11	部分凝血活酶时间	24.5	S	20-40	M	2016-09-27 12:49:32	*总胆固醇	6.46	mmol/l	3.6-5.17	H	2016-09-27 11:45:11	D二聚体	90	ng/ml	0-115	M	2016-09-27 12:49:32	*葡萄糖	5.82	mmol/l	3.89-6.11	M	2016-09-27 11:45:11	C反应蛋白	0.29	mg/l	0-8	M	2016-09-27 11:45:11	凝血酶原时间(PT)	11.8	S	42992	M	2016-09-27 12:49:32
470	1000175744003	凝血酶原国际比值	0.9		0.7-1.3	M	2017-02-16 09:45:08	低密度脂蛋白	3.61	mmol/l	健康人群:1.8-3.36;心脑血管疾病危险人群:<2.59	M	2017-02-16 09:37:18	部分凝血活酶时间	24	S	20-40	M	2017-02-16 09:45:08	*总胆固醇	6.26	mmol/l	3.6-5.17	H	2017-02-16 09:37:18	D二聚体	110	ng/ml	0-115	M	2017-02-16 09:45:08	*葡萄糖	6.66	mmol/l	3.89-6.11	H	2017-02-16 09:37:18	C反应蛋白	0.75	mg/l	0-8	M	2017-02-16 09:37:18	凝血酶原时间(PT)	10.4	S	42992	M	2017-02-16 09:45:08
471	1000176011002	凝血酶原国际比值	0.95		0.7-1.3	M	2015-12-09 13:35:00	低密度脂蛋白	4.04	mmol/l	健康人群:1.8-3.36;心脑血管疾病危险人群:<2.59	M	2015-12-09 13:27:41	部分凝血活酶时间	23.9	S	22-45	M	2015-12-09 13:35:00	*总胆固醇	6	mmol/l	3.6-5.17	H	2015-12-09 13:27:41	D二聚体	50	ng/ml	0-115	M	2015-12-09 13:35:00	*葡萄糖	6	mmol/l	3.89-6.11	M	2015-12-09 13:27:40	C反应蛋白	4.3	mg/l	0-8	M	2015-12-09 13:27:41	凝血酶原时间(PT)	10.9	S	42992	M	2015-12-09 13:35:00
472	1000176285002	凝血酶原国际比值	0.97		0.7-1.3	M	2014-12-03 09:04:10	低密度脂蛋白	1.41	mmol/l	健康人群:1.8-3.36;心脑血管疾病危险人群:<2.59	M	2014-12-03 09:14:07	部分凝血活酶时间	30.3	S	22-45	M	2014-12-03 09:04:10	*总胆固醇	3.23	mmol/l	3.6-5.17	L	2014-12-03 09:14:07	D二聚体	20	ng/ml	0-115	M	2014-12-03 09:04:10	*葡萄糖	4.63	mmol/l	3.89-6.11	M	2014-12-03 09:14:07	C反应蛋白	0.22	mg/l	0-8	M	2014-12-03 09:14:07	凝血酶原时间(PT)	11.2	S	42992	M	2014-12-03 09:04:10
473	1000176455002	凝血酶原国际比值	0.89		0.7-1.3	M	2015-03-23 09:37:28	低密度脂蛋白	2.58	mmol/l	健康人群:1.8-3.36;心脑血管疾病危险人群:<2.59	M	2015-03-23 09:55:35	部分凝血活酶时间	27.7	S	22-45	M	2015-03-23 09:37:28	*总胆固醇	4.15	mmol/l	3.6-5.17	M	2015-03-23 09:55:35	D二聚体	300	ng/ml	0-115	H	2015-03-23 09:37:28	*葡萄糖	6.69	mmol/l	3.89-6.11	H	2015-03-23 09:55:35	C反应蛋白	4.05	mg/l	0-8	M	2015-03-23 09:55:35	凝血酶原时间(PT)	10.2	S	42992	M	2015-03-23 09:37:28
474	1000177388002	凝血酶原国际比值	1.02		0.7-1.3	M	2014-12-09 09:11:18	低密度脂蛋白	2.76	mmol/l	健康人群:1.8-3.36;心脑血管疾病危险人群:<2.59	M	2014-12-09 08:53:35	部分凝血活酶时间	33.8	S	22-45	M	2014-12-09 09:11:18	*总胆固醇	4.34	mmol/l	3.6-5.17	M	2014-12-09 08:53:35	D二聚体	70	ng/ml	0-115	M	2014-12-09 09:11:18	*葡萄糖	9.9	mmol/l	3.89-6.11	H	2014-12-09 08:53:35	C反应蛋白	3.29	mg/l	0-8	M	2014-12-09 08:53:35	凝血酶原时间(PT)	11.7	S	42992	M	2014-12-09 09:11:18
475	1000177448002	凝血酶原国际比值	1.05		0.7-1.3	M	2016-05-02 13:14:47	低密度脂蛋白	2.51	mmol/l	健康人群:1.8-3.36;心脑血管疾病危险人群:<2.59	M	2016-05-02 09:56:41	部分凝血活酶时间	29.3	S	22-45	M	2016-05-02 13:14:47	*总胆固醇	4.34	mmol/l	3.6-5.17	M	2016-05-02 09:56:41	D二聚体	4950	ng/ml	0-115	H	2016-05-02 13:36:35	*葡萄糖	8.56	mmol/l	3.89-6.11	H	2016-05-02 09:56:41	C反应蛋白	22.41	mg/l	0-8	H	2016-05-02 09:56:41	凝血酶原时间(PT)	12.1	S	42992	M	2016-05-02 13:14:47
476	1000178121002	凝血酶原国际比值	1		0.7-1.3	M	2015-03-19 09:47:07	低密度脂蛋白	3.42	mmol/l	健康人群:1.8-3.36;心脑血管疾病危险人群:<2.59	M	2015-03-19 09:56:58	部分凝血活酶时间	30.5	S	22-45	M	2015-03-19 09:47:07	*总胆固醇	5.43	mmol/l	3.6-5.17	H	2015-03-19 09:56:58	D二聚体	270	ng/ml	0-115	H	2015-03-19 09:47:07	*葡萄糖	3.85	mmol/l	3.89-6.11	L	2015-03-19 09:56:58	C反应蛋白	22.67	mg/l	0-8	H	2015-03-19 09:56:58	凝血酶原时间(PT)	11.5	S	42992	M	2015-03-19 09:47:07
477	1000179316003	凝血酶原国际比值	0.87		0.7-1.3	M	2015-09-15 09:21:49	低密度脂蛋白	2.49	mmol/l	健康人群:1.8-3.36;心脑血管疾病危险人群:<2.59	M	2015-09-15 10:20:23	部分凝血活酶时间	29.3	S	22-45	M	2015-09-15 09:21:49	*总胆固醇	4.47	mmol/l	3.6-5.17	M	2015-09-15 10:20:23	D二聚体	60	ng/ml	0-115	M	2015-09-15 09:21:49	*葡萄糖	5.04	mmol/l	3.89-6.11	M	2015-09-15 10:20:23	C反应蛋白	0.08	mg/l	0-8	M	2015-09-16 08:42:32	凝血酶原时间(PT)	10	S	42992	M	2015-09-15 09:21:49
478	1000180578002	凝血酶原国际比值	0.82		0.7-1.3	M	2015-10-06 11:55:24	低密度脂蛋白	3.47	mmol/l	健康人群:1.8-3.36;心脑血管疾病危险人群:<2.59	M	2015-10-06 09:14:01	部分凝血活酶时间	31.6	S	22-45	M	2015-10-06 11:58:56	*总胆固醇	6.44	mmol/l	3.6-5.17	H	2015-10-06 09:14:01	D二聚体	158	ng/ml	0-115	H	2015-10-06 10:03:42	*葡萄糖	4.54	mmol/l	3.89-6.11	M	2015-10-06 09:14:01	C反应蛋白	0.72	mg/l	0-8	M	2015-10-06 09:16:40	凝血酶原时间(PT)	10.8	S	43023	M	2015-10-06 11:55:24
479	1000181075003	凝血酶原国际比值	0.96		0.7-1.3	M	2016-09-26 15:40:58	低密度脂蛋白	1.81	mmol/l	健康人群:1.8-3.36;心脑血管疾病危险人群:<2.59	M	2016-09-27 11:10:06	部分凝血活酶时间	25.8	S	20-40	M	2016-09-26 15:40:58	*总胆固醇	4.3	mmol/l	3.6-5.17	M	2016-09-27 11:10:06	D二聚体	7440	ng/ml	0-115	H	2016-09-26 15:40:58	*葡萄糖	7.2	mmol/l	3.89-6.11	H	2016-09-27 11:10:06	C反应蛋白	0.21	mg/l	0-8	M	2016-09-22 09:56:45	凝血酶原时间(PT)	11	S	42992	M	2016-09-26 15:40:58
480	1000181430002	凝血酶原国际比值	1		0.7-1.3	M	2016-07-18 10:18:47	低密度脂蛋白	2.59	mmol/l	健康人群:1.8-3.36;心脑血管疾病危险人群:<2.59	M	2016-07-18 09:27:46	部分凝血活酶时间	25.7	S	20-40	M	2016-07-18 10:18:47	*总胆固醇	5	mmol/l	3.6-5.17	M	2016-07-18 09:27:46	D二聚体	817	ng/ml	0-115	H	2016-07-18 11:37:24	*葡萄糖	5.93	mmol/l	3.89-6.11	M	2016-07-18 09:27:46	C反应蛋白	14.63	mg/l	0-8	H	2016-07-19 09:50:05	凝血酶原时间(PT)	11.5	S	42992	M	2016-07-18 10:18:47
481	1000181800003	凝血酶原国际比值	1.01		0.7-1.3	M	2016-01-08 19:19:25	低密度脂蛋白	1.93	mmol/l	健康人群:1.8-3.36;心脑血管疾病危险人群:<2.59	M	2016-01-08 19:23:40	部分凝血活酶时间	34.5	S	22-45	M	2016-01-08 19:19:25	*总胆固醇	4.3	mmol/l	3.6-5.17	M	2016-01-08 19:23:40	D二聚体	6490	ng/ml	0-115	H	2016-01-08 19:19:25	*葡萄糖	11.7	mmol/l	3.89-6.11	H	2016-01-08 19:23:40	C反应蛋白	30.6	mg/l	0-8	H	2016-01-08 19:23:00	凝血酶原时间(PT)	11.6	S	42992	M	2016-01-08 19:19:25
482	1000182571002	凝血酶原国际比值	1.25		0.7-1.3	M	2015-08-07 10:28:02	低密度脂蛋白	2.41	mmol/l	健康人群:1.8-3.36;心脑血管疾病危险人群:<2.59	M	2015-08-07 10:17:32	部分凝血活酶时间	35	S	22-45	M	2015-08-07 10:28:02	*总胆固醇	4.15	mmol/l	3.6-5.17	M	2015-08-07 10:17:32	D二聚体	150	ng/ml	0-115	H	2015-08-07 10:28:02	*葡萄糖	7.05	mmol/l	3.89-6.11	H	2015-08-07 10:17:32	C反应蛋白	0.73	mg/l	0-8	M	2015-08-07 10:17:32	凝血酶原时间(PT)	14.3	S	42992	H	2015-08-07 10:28:02
483	1000182609002	凝血酶原国际比值	0.9		0.7-1.3	M	2014-12-29 16:13:45	低密度脂蛋白	2.81	mmol/l	健康人群:1.8-3.36;心脑血管疾病危险人群:<2.59	M	2014-12-29 15:46:08	部分凝血活酶时间	36.8	S	22-45	M	2014-12-29 15:53:42	*总胆固醇	4.9	mmol/l	3.6-5.17	M	2014-12-29 15:46:08	D二聚体	195	ng/ml	0-115	H	2014-12-29 15:27:58	*葡萄糖	6	mmol/l	3.89-6.11	M	2014-12-29 15:46:08	C反应蛋白	5.6	mg/l	0-8	M	2014-12-29 15:46:08	凝血酶原时间(PT)	11.9	S	43023	M	2014-12-29 16:13:45
484	1000182757004	凝血酶原国际比值	0.94		0.7-1.3	M	2017-03-15 11:04:55	低密度脂蛋白	2.27	mmol/l	健康人群:1.8-3.36;心脑血管疾病危险人群:<2.59	M	2017-03-15 09:48:19	部分凝血活酶时间	22.8	S	20-40	M	2017-03-15 11:04:55	*总胆固醇	4.26	mmol/l	3.6-5.17	M	2017-03-15 09:48:19	D二聚体	220	ng/ml	0-115	H	2017-03-15 11:04:55	*葡萄糖	5.47	mmol/l	3.89-6.11	M	2017-03-15 09:48:19	C反应蛋白	0.94	mg/l	0-8	M	2017-03-15 09:47:37	凝血酶原时间(PT)	10.8	S	42992	M	2017-03-15 11:04:55
485	1000183042002	凝血酶原国际比值	1.12		0.7-1.3	M	2014-12-01 09:47:14	低密度脂蛋白	3.66	mmol/l	健康人群:1.8-3.36;心脑血管疾病危险人群:<2.59	M	2014-12-01 09:26:06	部分凝血活酶时间	30.9	S	22-45	M	2014-12-01 09:47:14	*总胆固醇	5.63	mmol/l	3.6-5.17	H	2014-12-01 09:26:06	D二聚体	70	ng/ml	0-115	M	2014-12-01 09:47:14	*葡萄糖	5.22	mmol/l	3.89-6.11	M	2014-12-01 09:26:06	C反应蛋白	2.99	mg/l	0-8	M	2014-12-01 09:26:06	凝血酶原时间(PT)	12.9	S	42992	M	2014-12-01 09:47:14
486	1000183410002	凝血酶原国际比值	0.99		0.7-1.3	M	2015-08-12 09:21:36	低密度脂蛋白	3.03	mmol/l	健康人群:1.8-3.36;心脑血管疾病危险人群:<2.59	M	2015-08-12 09:47:47	部分凝血活酶时间	28.8	S	22-45	M	2015-08-12 09:21:36	*总胆固醇	5.42	mmol/l	3.6-5.17	H	2015-08-12 09:47:47	D二聚体	600	ng/ml	0-115	H	2015-08-12 09:21:36	*葡萄糖	6.23	mmol/l	3.89-6.11	H	2015-08-12 09:47:47	C反应蛋白	1.3	mg/l	0-8	M	2015-08-12 11:03:37	凝血酶原时间(PT)	11.4	S	42992	M	2015-08-12 09:21:36
487	1000183473004	凝血酶原国际比值	1.2		0.7-1.3	M	2016-12-27 10:42:12	低密度脂蛋白	4.16	mmol/l	健康人群:1.8-3.36;心脑血管疾病危险人群:<2.59	M	2016-12-27 10:05:00	部分凝血活酶时间	34.2	S	20-40	M	2016-12-27 10:42:12	*总胆固醇	6.83	mmol/l	3.6-5.17	H	2016-12-27 10:05:00	D二聚体	840	ng/ml	0-115	H	2016-12-27 10:42:12	*葡萄糖	5.95	mmol/l	3.89-6.11	M	2016-12-27 10:05:00	C反应蛋白	73.59	mg/l	0-8	H	2017-01-08 10:07:24	凝血酶原时间(PT)	13.7	S	42992	M	2016-12-27 10:42:12
488	1000183543002	凝血酶原国际比值	0.94		0.7-1.3	M	2015-01-04 09:29:34	低密度脂蛋白	2.31	mmol/l	健康人群:1.8-3.36;心脑血管疾病危险人群:<2.59	M	2015-01-04 09:33:10	部分凝血活酶时间	40.2	S	22-45	M	2015-01-04 09:27:22	*总胆固醇	5.3	mmol/l	3.6-5.17	H	2015-01-04 09:33:10	D二聚体	652	ng/ml	0-115	H	2015-01-04 09:17:30	*葡萄糖	5.3	mmol/l	3.89-6.11	M	2015-01-04 09:33:10	C反应蛋白	82.5	mg/l	0-8	H	2015-01-04 09:33:10	凝血酶原时间(PT)	12.4	S	43023	M	2015-01-04 09:29:34
489	1000183819002	凝血酶原国际比值	0.96		0.7-1.3	M	2015-07-21 09:49:35	低密度脂蛋白	2.28	mmol/l	健康人群:1.8-3.36;心脑血管疾病危险人群:<2.59	M	2015-07-21 09:20:36	部分凝血活酶时间	33.1	S	22-45	M	2015-07-21 09:59:27	*总胆固醇	3.6	mmol/l	3.6-5.17	M	2015-07-21 09:20:36	D二聚体	574	ng/ml	0-115	H	2015-07-21 09:26:38	*葡萄糖	5.1	mmol/l	3.89-6.11	M	2015-07-21 09:20:36	C反应蛋白	1.23	mg/l	0-8	M	2015-07-21 10:12:17	凝血酶原时间(PT)	12.6	S	43023	M	2015-07-21 09:49:35
490	1000183819003	凝血酶原国际比值	1.01		0.7-1.3	M	2016-03-16 10:29:28	低密度脂蛋白	2.03	mmol/l	健康人群:1.8-3.36;心脑血管疾病危险人群:<2.59	M	2016-03-16 10:23:40	部分凝血活酶时间	25.4	S	22-45	M	2016-03-16 10:32:09	*总胆固醇	3.76	mmol/l	3.6-5.17	M	2016-03-16 10:23:40	D二聚体	254	ng/ml	0-115	H	2016-03-16 09:43:42	*葡萄糖	5.37	mmol/l	3.89-6.11	M	2016-03-16 10:23:40	C反应蛋白	1.58	mg/l	0-8	M	2016-03-16 10:23:40	凝血酶原时间(PT)	13.6	S	43023	M	2016-03-16 10:29:28
491	1000183965003	凝血酶原国际比值	0.89		0.7-1.3	M	2014-12-24 10:41:46	低密度脂蛋白	2	mmol/l	健康人群:1.8-3.36;心脑血管疾病危险人群:<2.59	M	2014-12-25 06:53:01	部分凝血活酶时间	25.7	S	22-45	M	2014-12-24 10:01:46	*总胆固醇	4.3	mmol/l	3.6-5.17	M	2014-12-25 06:53:01	D二聚体	70	ng/ml	0-115	M	2014-12-24 10:06:38	*葡萄糖	5.8	mmol/l	3.89-6.11	M	2014-12-25 06:53:01	C反应蛋白	3.92	mg/l	0-8	M	2014-12-24 10:12:36	凝血酶原时间(PT)	11.7	S	43023	M	2014-12-24 10:41:46
492	1000184036002	凝血酶原国际比值	0.96		0.7-1.3	M	2016-04-11 11:14:10	低密度脂蛋白	2.19	mmol/l	健康人群:1.8-3.36;心脑血管疾病危险人群:<2.59	M	2016-04-11 12:03:52	部分凝血活酶时间	25.9	S	22-45	M	2016-04-11 11:14:10	*总胆固醇	5.04	mmol/l	3.6-5.17	M	2016-04-11 12:03:52	D二聚体	620	ng/ml	0-115	H	2016-04-11 11:14:10	*葡萄糖	7.46	mmol/l	3.89-6.11	H	2016-04-11 12:03:52	C反应蛋白	4.74	mg/l	0-8	M	2016-04-11 11:29:05	凝血酶原时间(PT)	11.1	S	42992	M	2016-04-11 11:14:10
493	1000184096002	凝血酶原国际比值	0.99		0.7-1.3	M	2014-10-21 09:59:51	低密度脂蛋白	2.4	mmol/l	健康人群:1.8-3.36;心脑血管疾病危险人群:<2.59	M	2014-10-21 10:41:03	部分凝血活酶时间	25.7	S	22-45	M	2014-10-21 09:59:51	*总胆固醇	4.17	mmol/l	3.6-5.17	M	2014-10-21 10:41:03	D二聚体	30	ng/ml	0-115	M	2014-10-21 09:59:51	*葡萄糖	4.62	mmol/l	3.89-6.11	M	2014-10-21 10:41:03	C反应蛋白	0.5	mg/l	0-8	M	2014-10-23 09:40:24	凝血酶原时间(PT)	11.4	S	42992	M	2014-10-21 09:59:51
494	1000184310002	凝血酶原国际比值	0.86		0.7-1.3	M	2015-06-22 10:20:26	低密度脂蛋白	1.13	mmol/l	健康人群:1.8-3.36;心脑血管疾病危险人群:<2.59	M	2015-06-22 09:09:25	部分凝血活酶时间	42.1	S	22-45	M	2015-06-22 10:02:46	*总胆固醇	2.27	mmol/l	3.6-5.17	L	2015-06-22 09:09:25	D二聚体	1052	ng/ml	0-115	H	2015-07-03 15:20:59	*葡萄糖	4.56	mmol/l	3.89-6.11	M	2015-06-22 09:09:25	C反应蛋白	65.55	mg/l	0-8	H	2015-06-26 23:41:56	凝血酶原时间(PT)	11.4	S	43023	M	2015-06-22 10:20:26
495	1000184651002	凝血酶原国际比值	0.99		0.7-1.3	M	2014-10-10 11:09:52	低密度脂蛋白	3.21	mmol/l	健康人群:1.8-3.36;心脑血管疾病危险人群:<2.59	M	2014-10-10 10:22:11	部分凝血活酶时间	29.4	S	22-45	M	2014-10-10 11:09:52	*总胆固醇	5.83	mmol/l	3.6-5.17	H	2014-10-10 10:22:11	D二聚体	110	ng/ml	0-115	M	2014-10-10 11:59:25	*葡萄糖	5.32	mmol/l	3.89-6.11	M	2014-10-10 10:22:11	C反应蛋白	1.82	mg/l	0-8	M	2014-10-10 10:22:11	凝血酶原时间(PT)	11.4	S	42992	M	2014-10-10 11:09:52
496	1000185272003	凝血酶原国际比值	0.81		0.7-1.3	M	2015-06-17 11:30:01	低密度脂蛋白	3.25	mmol/l	健康人群:1.8-3.36;心脑血管疾病危险人群:<2.59	M	2015-06-17 10:01:46	部分凝血活酶时间	27.7	S	22-45	M	2015-06-17 11:30:01	*总胆固醇	5.53	mmol/l	3.6-5.17	H	2015-06-17 10:01:46	D二聚体	90	ng/ml	0-115	M	2015-06-17 11:30:01	*葡萄糖	5.01	mmol/l	3.89-6.11	M	2015-06-17 10:01:46	C反应蛋白	1.64	mg/l	0-8	M	2015-06-17 11:34:10	凝血酶原时间(PT)	9.3	S	42992	M	2015-06-17 11:30:01
497	1000185588002	凝血酶原国际比值	0.83		0.7-1.3	M	2015-07-02 16:52:44	低密度脂蛋白	2.28	mmol/l	健康人群:1.8-3.36;心脑血管疾病危险人群:<2.59	M	2015-07-02 16:49:06	部分凝血活酶时间	39.9	S	22-45	M	2015-07-02 17:09:17	*总胆固醇	4.27	mmol/l	3.6-5.17	M	2015-07-02 16:49:06	D二聚体	114	ng/ml	0-115	M	2015-07-02 17:12:22	*葡萄糖	4.8	mmol/l	3.89-6.11	M	2015-07-02 16:49:06	C反应蛋白	43	mg/l	0-8	H	2015-07-05 09:56:14	凝血酶原时间(PT)	11	S	43023	M	2015-07-02 16:52:44
498	1000185733002	凝血酶原国际比值	0.87		0.7-1.3	M	2015-04-18 09:49:03	低密度脂蛋白	3.6	mmol/l	健康人群:1.8-3.36;心脑血管疾病危险人群:<2.59	M	2015-04-18 10:07:59	部分凝血活酶时间	29.7	S	22-45	M	2015-04-18 09:49:03	*总胆固醇	6.12	mmol/l	3.6-5.17	H	2015-04-18 10:07:59	D二聚体	30	ng/ml	0-115	M	2015-04-18 09:49:03	*葡萄糖	5.51	mmol/l	3.89-6.11	M	2015-04-18 10:07:59	C反应蛋白	1.8	mg/l	0-8	M	2015-04-18 10:07:59	凝血酶原时间(PT)	10	S	42992	M	2015-04-18 09:49:03
499	1000185743003	凝血酶原国际比值	0.85		0.7-1.3	M	2015-05-14 13:41:06	低密度脂蛋白	2.92	mmol/l	健康人群:1.8-3.36;心脑血管疾病危险人群:<2.59	M	2015-05-14 14:02:33	部分凝血活酶时间	21.1	S	22-45	L	2015-05-14 13:41:06	*总胆固醇	5.9	mmol/l	3.6-5.17	H	2015-05-14 14:02:33	D二聚体	2870	ng/ml	0-115	H	2015-05-14 13:41:06	*葡萄糖	4.8	mmol/l	3.89-6.11	M	2015-05-14 14:02:33	C反应蛋白	0.4	mg/l	0-8	M	2015-05-14 14:02:33	凝血酶原时间(PT)	9.8	S	42992	M	2015-05-14 13:41:06
500	1000185792003	凝血酶原国际比值	1.02		0.7-1.3	M	2016-02-18 10:24:10	低密度脂蛋白	2.65	mmol/l	健康人群:1.8-3.36;心脑血管疾病危险人群:<2.59	M	2016-02-18 11:19:51	部分凝血活酶时间	33.6	S	22-45	M	2016-02-18 10:24:10	*总胆固醇	4.53	mmol/l	3.6-5.17	M	2016-02-18 11:19:51	D二聚体	20	ng/ml	0-115	M	2016-02-18 10:24:10	*葡萄糖	4.44	mmol/l	3.89-6.11	M	2016-02-18 11:19:51	C反应蛋白	0.97	mg/l	0-8	M	2016-02-19 09:28:40	凝血酶原时间(PT)	11.7	S	42992	M	2016-02-18 10:24:10
501	1000185951002	凝血酶原国际比值	0.94		0.7-1.3	M	2016-08-16 10:39:35	低密度脂蛋白	3.86	mmol/l	健康人群:1.8-3.36;心脑血管疾病危险人群:<2.59	M	2016-08-16 11:29:24	部分凝血活酶时间	26.7	S	20-40	M	2016-08-16 10:39:35	*总胆固醇	6.57	mmol/l	3.6-5.17	H	2016-08-16 11:29:24	D二聚体	110	ng/ml	0-115	M	2016-08-16 10:39:35	*葡萄糖	6.09	mmol/l	3.89-6.11	M	2016-08-16 11:29:24	C反应蛋白	3.27	mg/l	0-8	M	2016-08-16 11:29:24	凝血酶原时间(PT)	10.8	S	42992	M	2016-08-16 10:39:35
502	1000185975002	凝血酶原国际比值	1.1		0.7-1.3	M	2014-09-16 11:20:49	低密度脂蛋白	2.54	mmol/l	健康人群:1.8-3.36;心脑血管疾病危险人群:<2.59	M	2014-09-16 11:13:18	部分凝血活酶时间	26.9	S	22-45	M	2014-09-16 11:29:00	*总胆固醇	4.87	mmol/l	3.6-5.17	M	2014-09-16 11:13:18	D二聚体	70	ng/ml	0-115	M	2014-09-16 11:20:49	*葡萄糖	4.6	mmol/l	3.89-6.11	M	2014-09-16 11:13:18	C反应蛋白	2.1	mg/l	0-8	M	2014-09-16 11:13:18	凝血酶原时间(PT)	12.7	S	42992	M	2014-09-16 11:20:49
503	1000185975003	凝血酶原国际比值	0.93		0.7-1.3	M	2015-03-10 10:43:24	低密度脂蛋白	3.13	mmol/l	健康人群:1.8-3.36;心脑血管疾病危险人群:<2.59	M	2015-03-10 09:48:53	部分凝血活酶时间	32.1	S	22-45	M	2015-03-10 10:43:24	*总胆固醇	5.57	mmol/l	3.6-5.17	H	2015-03-10 09:48:53	D二聚体	810	ng/ml	0-115	H	2015-03-10 10:43:24	*葡萄糖	5.12	mmol/l	3.89-6.11	M	2015-03-10 09:48:53	C反应蛋白	2.26	mg/l	0-8	M	2015-03-10 09:48:53	凝血酶原时间(PT)	10.7	S	42992	M	2015-03-10 10:43:24
504	1000185986002	凝血酶原国际比值	0.94		0.7-1.3	M	2015-06-18 10:59:27	低密度脂蛋白	2.27	mmol/l	健康人群:1.8-3.36;心脑血管疾病危险人群:<2.59	M	2015-06-18 10:49:28	部分凝血活酶时间	40.6	S	22-45	M	2015-06-18 10:57:22	*总胆固醇	4.04	mmol/l	3.6-5.17	M	2015-06-18 10:49:28	D二聚体	50	ng/ml	0-115	M	2015-06-18 10:46:39	*葡萄糖	5.24	mmol/l	3.89-6.11	M	2015-06-18 10:49:28	C反应蛋白	11.49	mg/l	0-8	H	2015-06-24 09:55:07	凝血酶原时间(PT)	12.4	S	43023	M	2015-06-18 10:59:27
505	1000186023002	凝血酶原国际比值	0.82		0.7-1.3	M	2015-10-02 09:25:47	低密度脂蛋白	1.57	mmol/l	健康人群:1.8-3.36;心脑血管疾病危险人群:<2.59	M	2015-10-02 09:15:48	部分凝血活酶时间	34.7	S	22-45	M	2015-10-02 09:25:47	*总胆固醇	3.55	mmol/l	3.6-5.17	L	2015-10-02 09:15:48	D二聚体	6400	ng/ml	0-115	H	2015-10-02 09:25:47	*葡萄糖	7.23	mmol/l	3.89-6.11	H	2015-10-02 09:15:48	C反应蛋白	128.75	mg/l	0-8	H	2015-10-03 09:30:59	凝血酶原时间(PT)	9.5	S	42992	M	2015-10-02 09:25:47
506	1000186292002	凝血酶原国际比值	0.93		0.7-1.3	M	2014-09-16 10:59:02	低密度脂蛋白	2.7	mmol/l	健康人群:1.8-3.36;心脑血管疾病危险人群:<2.59	M	2014-09-16 09:24:14	部分凝血活酶时间	38.3	S	22-45	M	2014-09-16 11:02:54	*总胆固醇	4.1	mmol/l	3.6-5.17	M	2014-09-16 09:24:14	D二聚体	44	ng/ml	0-115	M	2014-09-16 10:02:52	*葡萄糖	4.13	mmol/l	3.89-6.11	M	2014-09-16 09:24:14	C反应蛋白	7.59	mg/l	0-8	M	2014-09-16 09:24:14	凝血酶原时间(PT)	12.3	S	43023	M	2014-09-16 10:59:02
507	1000186292003	凝血酶原国际比值	0.94		0.7-1.3	M	2015-10-20 13:32:48	低密度脂蛋白	2.62	mmol/l	健康人群:1.8-3.36;心脑血管疾病危险人群:<2.59	M	2015-10-20 13:44:23	部分凝血活酶时间	31.1	S	22-45	M	2015-10-20 13:32:48	*总胆固醇	4.3	mmol/l	3.6-5.17	M	2015-10-20 13:44:23	D二聚体	2670	ng/ml	0-115	H	2015-10-20 13:32:48	*葡萄糖	4.5	mmol/l	3.89-6.11	M	2015-10-20 13:44:23	C反应蛋白	12	mg/l	0-8	H	2015-10-20 13:44:23	凝血酶原时间(PT)	10.8	S	42992	M	2015-10-20 13:32:48
508	1000186456002	凝血酶原国际比值	1.1		0.7-1.3	M	2016-05-07 09:47:08	低密度脂蛋白	2	mmol/l	健康人群:1.8-3.36;心脑血管疾病危险人群:<2.59	M	2016-05-07 09:59:04	部分凝血活酶时间	31.1	S	22-45	M	2016-05-07 09:47:08	*总胆固醇	3.77	mmol/l	3.6-5.17	M	2016-05-07 09:59:04	D二聚体	118	ng/ml	0-115	H	2016-05-07 10:26:57	*葡萄糖	4.79	mmol/l	3.89-6.11	M	2016-05-07 09:59:04	C反应蛋白	14.87	mg/l	0-8	H	2016-05-13 09:18:51	凝血酶原时间(PT)	12.6	S	42992	M	2016-05-07 09:47:08
509	1000186541002	凝血酶原国际比值	0.81		0.7-1.3	M	2015-10-28 10:28:13	低密度脂蛋白	2.21	mmol/l	健康人群:1.8-3.36;心脑血管疾病危险人群:<2.59	M	2015-10-28 09:17:32	部分凝血活酶时间	22.6	S	22-45	M	2015-10-28 11:44:39	*总胆固醇	2.03	mmol/l	3.6-5.17	L	2015-10-28 09:17:32	D二聚体	70	ng/ml	0-115	M	2015-10-28 10:28:13	*葡萄糖	5.49	mmol/l	3.89-6.11	M	2015-10-28 09:17:32	C反应蛋白	0.02	mg/l	0-8	M	2015-10-28 09:17:32	凝血酶原时间(PT)	9.3	S	42992	M	2015-10-28 10:28:13
510	1000186937003	凝血酶原国际比值	0.98		0.7-1.3	M	2016-03-23 10:17:49	低密度脂蛋白	3.35	mmol/l	健康人群:1.8-3.36;心脑血管疾病危险人群:<2.59	M	2016-03-23 09:19:16	部分凝血活酶时间	22.8	S	22-45	M	2016-03-23 10:17:49	*总胆固醇	5.66	mmol/l	3.6-5.17	H	2016-03-23 09:19:16	D二聚体	610	ng/ml	0-115	H	2016-03-23 10:17:49	*葡萄糖	10.5	mmol/l	3.89-6.11	H	2016-03-23 09:19:16	C反应蛋白	64.03	mg/l	0-8	H	2016-03-20 09:35:10	凝血酶原时间(PT)	11.3	S	42992	M	2016-03-23 10:17:49
511	1000186953002	凝血酶原国际比值	0.9		0.7-1.3	M	2014-11-28 09:37:46	低密度脂蛋白	1.6	mmol/l	健康人群:1.8-3.36;心脑血管疾病危险人群:<2.59	M	2014-11-28 09:06:59	部分凝血活酶时间	31.6	S	22-45	M	2014-11-28 09:33:49	*总胆固醇	4.08	mmol/l	3.6-5.17	M	2014-11-28 09:06:59	D二聚体	501	ng/ml	0-115	H	2014-11-28 09:24:29	*葡萄糖	5.67	mmol/l	3.89-6.11	M	2014-11-28 09:06:59	C反应蛋白	0.51	mg/l	0-8	M	2014-11-28 09:06:59	凝血酶原时间(PT)	11.8	S	43023	M	2014-11-28 09:37:46
512	1000187083004	凝血酶原国际比值	0.94		0.7-1.3	M	2016-03-01 11:52:44	低密度脂蛋白	3.01	mmol/l	健康人群:1.8-3.36;心脑血管疾病危险人群:<2.59	M	2016-03-01 10:22:41	部分凝血活酶时间	29	S	22-45	M	2016-03-01 11:52:44	*总胆固醇	5.23	mmol/l	3.6-5.17	H	2016-03-01 10:22:41	D二聚体	30	ng/ml	0-115	M	2016-03-01 11:52:44	*葡萄糖	5.23	mmol/l	3.89-6.11	M	2016-03-01 10:22:41	C反应蛋白	1.1	mg/l	0-8	M	2016-03-03 19:00:34	凝血酶原时间(PT)	10.8	S	42992	M	2016-03-01 11:52:44
513	1000187487002	凝血酶原国际比值	1		0.7-1.3	M	2014-12-23 10:36:35	低密度脂蛋白	2.83	mmol/l	健康人群:1.8-3.36;心脑血管疾病危险人群:<2.59	M	2014-12-23 09:42:07	部分凝血活酶时间	28.5	S	22-45	M	2014-12-23 10:36:35	*总胆固醇	4.21	mmol/l	3.6-5.17	M	2014-12-23 09:42:07	D二聚体	89	ng/ml	0-115	M	2014-12-23 10:36:35	*葡萄糖	5.89	mmol/l	3.89-6.11	M	2014-12-23 09:42:07	C反应蛋白	12.62	mg/l	0-8	H	2014-12-23 09:42:07	凝血酶原时间(PT)	11.5	S	42992	M	2014-12-23 10:36:35
514	1000187644002	凝血酶原国际比值	1.07		0.7-1.3	M	2015-01-29 09:29:33	低密度脂蛋白	2.91	mmol/l	健康人群:1.8-3.36;心脑血管疾病危险人群:<2.59	M	2015-01-29 09:51:47	部分凝血活酶时间	36.5	S	22-45	M	2015-01-29 09:13:08	*总胆固醇	4.73	mmol/l	3.6-5.17	M	2015-01-29 09:51:47	D二聚体	440	ng/ml	0-115	H	2015-01-30 12:56:37	*葡萄糖	5.3	mmol/l	3.89-6.11	M	2015-01-29 09:51:47	C反应蛋白	57.2	mg/l	0-8	H	2015-01-29 10:49:03	凝血酶原时间(PT)	14	S	43023	M	2015-01-29 09:29:33
515	1000187695002	凝血酶原国际比值	0.96		0.7-1.3	M	2014-09-02 09:12:30	低密度脂蛋白	2.93	mmol/l	健康人群:1.8-3.36;心脑血管疾病危险人群:<2.59	M	2014-09-02 08:06:53	部分凝血活酶时间	26.1	S	22-45	M	2014-09-02 09:12:30	*总胆固醇	4.91	mmol/l	3.6-5.17	M	2014-09-02 08:06:53	D二聚体	40	ng/ml	0-115	M	2014-09-02 09:12:30	*葡萄糖	6.03	mmol/l	3.89-6.11	M	2014-09-02 08:06:53	C反应蛋白	3.13	mg/l	0-8	M	2014-09-02 08:06:53	凝血酶原时间(PT)	11	S	42992	M	2014-09-02 09:12:30
516	1000187706004	凝血酶原国际比值	1.01		0.7-1.3	M	2016-08-19 09:06:30	低密度脂蛋白	2.31	mmol/l	健康人群:1.8-3.36;心脑血管疾病危险人群:<2.59	M	2016-08-19 09:02:35	部分凝血活酶时间	22.5	S	20-40	M	2016-08-19 09:06:30	*总胆固醇	5.24	mmol/l	3.6-5.17	H	2016-08-19 09:02:35	D二聚体	690	ng/ml	0-115	H	2016-08-19 09:06:30	*葡萄糖	3.34	mmol/l	3.89-6.11	L	2016-08-19 09:02:35	C反应蛋白	13.16	mg/l	0-8	H	2016-08-19 09:02:38	凝血酶原时间(PT)	11.6	S	42992	M	2016-08-19 09:06:30
517	1000187728002	凝血酶原国际比值	0.93		0.7-1.3	M	2016-03-19 11:18:28	低密度脂蛋白	2.16	mmol/l	健康人群:1.8-3.36;心脑血管疾病危险人群:<2.59	M	2016-03-19 09:48:58	部分凝血活酶时间	25.6	S	22-45	M	2016-03-19 11:18:28	*总胆固醇	4.8	mmol/l	3.6-5.17	M	2016-03-19 09:48:58	D二聚体	70	ng/ml	0-115	M	2016-03-19 12:09:26	*葡萄糖	7.08	mmol/l	3.89-6.11	H	2016-03-19 09:48:58	C反应蛋白	4.19	mg/l	0-8	M	2016-03-19 09:48:58	凝血酶原时间(PT)	10.7	S	42992	M	2016-03-19 11:18:28
518	1000187739002	凝血酶原国际比值	0.86		0.7-1.3	M	2014-11-06 10:21:09	低密度脂蛋白	3.93	mmol/l	健康人群:1.8-3.36;心脑血管疾病危险人群:<2.59	M	2014-11-06 10:38:05	部分凝血活酶时间	31.7	S	22-45	M	2014-11-06 10:17:23	*总胆固醇	6.22	mmol/l	3.6-5.17	H	2014-11-06 10:38:05	D二聚体	185	ng/ml	0-115	H	2014-11-06 10:00:17	*葡萄糖	4.98	mmol/l	3.89-6.11	M	2014-11-06 10:38:05	C反应蛋白	0.34	mg/l	0-8	M	2014-11-06 11:00:48	凝血酶原时间(PT)	11.3	S	43023	M	2014-11-06 10:21:09
519	1000188029002	凝血酶原国际比值	0.92		0.7-1.3	M	2015-08-12 17:19:54	低密度脂蛋白	2.99	mmol/l	健康人群:1.8-3.36;心脑血管疾病危险人群:<2.59	M	2015-08-12 17:11:59	部分凝血活酶时间	28.1	S	22-45	M	2015-08-12 17:19:54	*总胆固醇	4.92	mmol/l	3.6-5.17	M	2015-08-12 17:11:59	D二聚体	40	ng/ml	0-115	M	2015-08-12 17:19:54	*葡萄糖	5.94	mmol/l	3.89-6.11	M	2015-08-12 17:11:59	C反应蛋白	237.5	mg/l	0-8	H	2015-08-16 09:41:01	凝血酶原时间(PT)	10.6	S	42992	M	2015-08-12 17:19:54
520	1000188191002	凝血酶原国际比值	0.81		0.7-1.3	M	2015-10-20 10:08:16	低密度脂蛋白	2.6	mmol/l	健康人群:1.8-3.36;心脑血管疾病危险人群:<2.59	M	2015-10-20 10:55:20	部分凝血活酶时间	23.8	S	22-45	M	2015-10-20 10:08:16	*总胆固醇	5.16	mmol/l	3.6-5.17	M	2015-10-20 10:55:20	D二聚体	100	ng/ml	0-115	M	2015-10-20 10:08:16	*葡萄糖	5.58	mmol/l	3.89-6.11	M	2015-10-20 10:55:20	C反应蛋白	2.39	mg/l	0-8	M	2015-10-20 10:55:20	凝血酶原时间(PT)	9.4	S	42992	M	2015-10-20 10:08:16
521	1000188205003	凝血酶原国际比值	0.95		0.7-1.3	M	2015-07-14 09:55:36	低密度脂蛋白	1.37	mmol/l	健康人群:1.8-3.36;心脑血管疾病危险人群:<2.59	M	2015-07-22 09:17:32	部分凝血活酶时间	39.7	S	22-45	M	2015-07-14 09:55:36	*总胆固醇	3.45	mmol/l	3.6-5.17	L	2015-07-22 09:17:32	D二聚体	90	ng/ml	0-115	M	2015-07-14 09:55:36	*葡萄糖	5.63	mmol/l	3.89-6.11	M	2015-07-22 09:17:32	C反应蛋白	1.32	mg/l	0-8	M	2015-07-14 12:34:24	凝血酶原时间(PT)	10.9	S	42992	M	2015-07-14 09:55:36
522	1000188300002	凝血酶原国际比值	0.89		0.7-1.3	M	2014-11-03 10:00:30	低密度脂蛋白	3.05	mmol/l	健康人群:1.8-3.36;心脑血管疾病危险人群:<2.59	M	2014-11-03 08:59:39	部分凝血活酶时间	30.5	S	22-45	M	2014-11-03 09:57:59	*总胆固醇	5.49	mmol/l	3.6-5.17	H	2014-11-03 08:59:39	D二聚体	146	ng/ml	0-115	H	2014-11-03 10:36:22	*葡萄糖	5.47	mmol/l	3.89-6.11	M	2014-11-03 08:59:39	C反应蛋白	3.88	mg/l	0-8	M	2014-11-03 08:59:39	凝血酶原时间(PT)	11.7	S	43023	M	2014-11-03 10:00:30
523	1000188505002	凝血酶原国际比值	0.97		0.7-1.3	M	2017-03-16 12:15:48	低密度脂蛋白	4.38	mmol/l	健康人群:1.8-3.36;心脑血管疾病危险人群:<2.59	M	2017-03-16 10:31:59	部分凝血活酶时间	26	S	20-40	M	2017-03-16 12:15:48	*总胆固醇	6.65	mmol/l	3.6-5.17	H	2017-03-16 10:31:59	D二聚体	890	ng/ml	0-115	H	2017-03-16 12:15:48	*葡萄糖	7.66	mmol/l	3.89-6.11	H	2017-03-16 10:31:59	C反应蛋白	49.31	mg/l	0-8	H	2017-03-16 10:31:59	凝血酶原时间(PT)	11.2	S	42992	M	2017-03-16 12:15:48
524	1000188631002	凝血酶原国际比值	0.89		0.7-1.3	M	2015-03-06 09:43:17	低密度脂蛋白	3.32	mmol/l	健康人群:1.8-3.36;心脑血管疾病危险人群:<2.59	M	2015-03-06 10:22:02	部分凝血活酶时间	23.3	S	22-45	M	2015-03-06 09:43:17	*总胆固醇	5.41	mmol/l	3.6-5.17	H	2015-03-06 10:22:02	D二聚体	89	ng/ml	0-115	M	2015-03-06 10:12:28	*葡萄糖	9.11	mmol/l	3.89-6.11	H	2015-03-06 10:22:02	C反应蛋白	0.07	mg/l	0-8	M	2015-03-06 10:44:21	凝血酶原时间(PT)	10.2	S	42992	M	2015-03-06 09:43:17
525	1000188643003	凝血酶原国际比值	0.89		0.7-1.3	M	2015-10-22 09:55:01	低密度脂蛋白	2.33	mmol/l	健康人群:1.8-3.36;心脑血管疾病危险人群:<2.59	M	2015-10-22 10:07:02	部分凝血活酶时间	32	S	22-45	M	2015-10-22 09:55:01	*总胆固醇	4.23	mmol/l	3.6-5.17	M	2015-10-22 10:07:02	D二聚体	60	ng/ml	0-115	M	2015-10-22 09:55:01	*葡萄糖	6.13	mmol/l	3.89-6.11	H	2015-10-22 10:07:02	C反应蛋白	25.37	mg/l	0-8	H	2015-10-24 09:52:06	凝血酶原时间(PT)	10.3	S	42992	M	2015-10-22 09:55:01
526	1000188889002	凝血酶原国际比值	0.87		0.7-1.3	M	2016-09-19 09:00:48	低密度脂蛋白	3.05	mmol/l	健康人群:1.8-3.36;心脑血管疾病危险人群:<2.59	M	2016-09-19 10:19:35	部分凝血活酶时间	25.6	S	20-40	M	2016-09-19 09:00:48	*总胆固醇	4.94	mmol/l	3.6-5.17	M	2016-09-19 10:19:35	D二聚体	140	ng/ml	0-115	H	2016-09-19 09:00:48	*葡萄糖	5.28	mmol/l	3.89-6.11	M	2016-09-19 10:19:34	C反应蛋白	8.95	mg/l	0-8	H	2016-09-19 10:19:34	凝血酶原时间(PT)	10	S	42992	M	2016-09-19 09:00:48
527	1000189169002	凝血酶原国际比值	1.05		0.7-1.3	M	2017-03-25 11:39:36	低密度脂蛋白	2.41	mmol/l	健康人群:1.8-3.36;心脑血管疾病危险人群:<2.59	M	2017-03-25 10:28:23	部分凝血活酶时间	24.2	S	20-40	M	2017-03-25 11:39:36	*总胆固醇	4.05	mmol/l	3.6-5.17	M	2017-03-25 10:28:23	D二聚体	110	ng/ml	0-115	M	2017-03-25 11:39:36	*葡萄糖	5.07	mmol/l	3.89-6.11	M	2017-03-25 10:28:23	C反应蛋白	11.83	mg/l	0-8	H	2017-03-25 10:28:29	凝血酶原时间(PT)	12.1	S	42992	M	2017-03-25 11:39:35
528	1000189310002	凝血酶原国际比值	0.97		0.7-1.3	M	2015-04-22 11:07:13	低密度脂蛋白	1.96	mmol/l	健康人群:1.8-3.36;心脑血管疾病危险人群:<2.59	M	2015-04-22 10:59:37	部分凝血活酶时间	27.1	S	22-45	M	2015-04-22 11:07:13	*总胆固醇	3.8	mmol/l	3.6-5.17	M	2015-04-22 10:59:37	D二聚体	290	ng/ml	0-115	H	2015-04-22 11:07:13	*葡萄糖	3.24	mmol/l	3.89-6.11	L	2015-04-22 10:59:37	C反应蛋白	1.77	mg/l	0-8	M	2015-04-22 10:59:37	凝血酶原时间(PT)	11.2	S	42992	M	2015-04-22 11:07:13
529	1000189337002	凝血酶原国际比值	1.09		0.7-1.3	M	2014-10-24 09:06:46	低密度脂蛋白	2.92	mmol/l	健康人群:1.8-3.36;心脑血管疾病危险人群:<2.59	M	2014-10-24 09:08:15	部分凝血活酶时间	27.5	S	22-45	M	2014-10-24 09:06:46	*总胆固醇	5.17	mmol/l	3.6-5.17	M	2014-10-24 09:08:15	D二聚体	3150	ng/ml	0-115	H	2014-10-24 09:06:46	*葡萄糖	4.6	mmol/l	3.89-6.11	M	2014-10-24 09:08:15	C反应蛋白	54.3	mg/l	0-8	H	2014-10-24 09:08:15	凝血酶原时间(PT)	12.6	S	42992	M	2014-10-24 09:06:46
530	1000189398003	凝血酶原国际比值	1.02		0.7-1.3	M	2016-08-04 14:05:34	低密度脂蛋白	2.71	mmol/l	健康人群:1.8-3.36;心脑血管疾病危险人群:<2.59	M	2016-08-04 12:19:35	部分凝血活酶时间	38.4	S	22-45	M	2016-08-04 13:44:03	*总胆固醇	5.3	mmol/l	3.6-5.17	H	2016-08-04 12:19:35	D二聚体	2215	ng/ml	0-115	H	2016-08-04 14:04:58	*葡萄糖	4	mmol/l	3.89-6.11	M	2016-08-04 12:19:35	C反应蛋白	23.5	mg/l	0-8	H	2016-08-04 12:19:35	凝血酶原时间(PT)	12.6	S	43023	M	2016-08-04 14:05:34
531	1000189469002	凝血酶原国际比值	0.84		0.7-1.3	M	2016-04-26 10:58:05	低密度脂蛋白	2.41	mmol/l	健康人群:1.8-3.36;心脑血管疾病危险人群:<2.59	M	2016-04-26 09:30:00	部分凝血活酶时间	23.6	S	22-45	M	2016-04-26 10:58:05	*总胆固醇	4.66	mmol/l	3.6-5.17	M	2016-04-26 09:30:00	D二聚体	60	ng/ml	0-115	M	2016-04-26 10:58:05	*葡萄糖	4.92	mmol/l	3.89-6.11	M	2016-04-26 09:30:00	C反应蛋白	0.51	mg/l	0-8	M	2016-04-26 09:30:00	凝血酶原时间(PT)	9.7	S	42992	M	2016-04-26 10:58:05
532	1000189601002	凝血酶原国际比值	0.94		0.7-1.3	M	2014-08-22 11:27:04	低密度脂蛋白	2.76	mmol/l	健康人群:1.8-3.36;心脑血管疾病危险人群:<2.59	M	2014-08-22 11:36:47	部分凝血活酶时间	22.7	S	22-45	M	2014-08-22 11:27:04	*总胆固醇	5.47	mmol/l	3.6-5.17	H	2014-08-22 11:36:47	D二聚体	180	ng/ml	0-115	H	2014-08-22 11:33:44	*葡萄糖	4.97	mmol/l	3.89-6.11	M	2014-08-22 11:36:47	C反应蛋白	54.05	mg/l	0-8	H	2014-08-22 11:36:49	凝血酶原时间(PT)	10.8	S	42992	M	2014-08-22 11:27:04
533	1000190527002	凝血酶原国际比值	0.82		0.7-1.3	M	2015-05-29 10:28:59	低密度脂蛋白	5.65	mmol/l	健康人群:1.8-3.36;心脑血管疾病危险人群:<2.59	M	2015-05-29 10:51:50	部分凝血活酶时间	24.3	S	22-45	M	2015-05-29 10:29:00	*总胆固醇	10.5	mmol/l	3.6-5.17	H	2015-05-29 10:51:50	D二聚体	290	ng/ml	0-115	H	2015-05-29 10:29:00	*葡萄糖	6.3	mmol/l	3.89-6.11	H	2015-05-29 10:51:50	C反应蛋白	13.7	mg/l	0-8	H	2015-05-29 10:03:30	凝血酶原时间(PT)	9.4	S	42992	M	2015-05-29 10:28:59
534	1000190552002	凝血酶原国际比值	0.95		0.7-1.3	M	2016-03-03 14:52:48	低密度脂蛋白	5.39	mmol/l	健康人群:1.8-3.36;心脑血管疾病危险人群:<2.59	M	2016-03-04 16:54:10	部分凝血活酶时间	26.5	S	22-45	M	2016-03-03 14:52:48	*总胆固醇	8.7	mmol/l	3.6-5.17	H	2016-03-04 16:54:10	D二聚体	190	ng/ml	0-115	H	2016-03-03 14:52:48	*葡萄糖	5.9	mmol/l	3.89-6.11	M	2016-03-04 16:54:10	C反应蛋白	8.9	mg/l	0-8	H	2016-03-04 16:54:10	凝血酶原时间(PT)	10.9	S	42992	M	2016-03-03 14:52:48
535	1000190558003	凝血酶原国际比值	0.99		0.7-1.3	M	2015-03-17 11:07:17	低密度脂蛋白	1.66	mmol/l	健康人群:1.8-3.36;心脑血管疾病危险人群:<2.59	M	2015-03-17 12:00:07	部分凝血活酶时间	30.2	S	22-45	M	2015-03-17 11:07:17	*总胆固醇	3.54	mmol/l	3.6-5.17	L	2015-03-17 12:00:07	D二聚体	89	ng/ml	0-115	M	2015-03-17 11:07:17	*葡萄糖	5.36	mmol/l	3.89-6.11	M	2015-03-17 12:00:07	C反应蛋白	37.72	mg/l	0-8	H	2015-03-19 11:24:17	凝血酶原时间(PT)	11.4	S	42992	M	2015-03-17 11:07:17
536	1000190678002	凝血酶原国际比值	1.04		0.7-1.3	M	2014-09-09 10:09:56	低密度脂蛋白	2.7	mmol/l	健康人群:1.8-3.36;心脑血管疾病危险人群:<2.59	M	2014-09-09 10:28:28	部分凝血活酶时间	22.8	S	22-45	M	2014-09-09 10:59:46	*总胆固醇	4.7	mmol/l	3.6-5.17	M	2014-09-09 10:28:28	D二聚体	30	ng/ml	0-115	M	2014-09-09 10:09:56	*葡萄糖	5.47	mmol/l	3.89-6.11	M	2014-09-09 10:28:28	C反应蛋白	3.57	mg/l	0-8	M	2014-09-09 10:28:18	凝血酶原时间(PT)	12	S	42992	M	2014-09-09 10:09:56
537	1000190831002	凝血酶原国际比值	0.99		0.7-1.3	M	2014-11-04 11:40:37	低密度脂蛋白	3	mmol/l	健康人群:1.8-3.36;心脑血管疾病危险人群:<2.59	M	2014-11-04 09:48:13	部分凝血活酶时间	33.6	S	22-45	M	2014-11-04 11:40:37	*总胆固醇	4.78	mmol/l	3.6-5.17	M	2014-11-04 09:48:13	D二聚体	110	ng/ml	0-115	M	2014-11-04 11:55:20	*葡萄糖	5.24	mmol/l	3.89-6.11	M	2014-11-04 09:48:13	C反应蛋白	1.45	mg/l	0-8	M	2014-11-04 09:48:13	凝血酶原时间(PT)	11.4	S	42992	M	2014-11-04 11:40:37
538	1000191440002	凝血酶原国际比值	0.94		0.7-1.3	M	2016-05-25 10:31:41	低密度脂蛋白	2.67	mmol/l	健康人群:1.8-3.36;心脑血管疾病危险人群:<2.59	M	2016-05-25 09:34:37	部分凝血活酶时间	29.7	S	22-45	M	2016-05-25 10:31:41	*总胆固醇	4.63	mmol/l	3.6-5.17	M	2016-05-25 09:34:37	D二聚体	140	ng/ml	0-115	H	2016-05-25 10:31:41	*葡萄糖	6.85	mmol/l	3.89-6.11	H	2016-05-25 09:34:37	C反应蛋白	5.75	mg/l	0-8	M	2016-05-25 09:34:37	凝血酶原时间(PT)	10.8	S	42992	M	2016-05-25 10:31:41
539	1000191522002	凝血酶原国际比值	1.14		0.7-1.3	M	2016-08-31 10:18:58	低密度脂蛋白	2.3	mmol/l	健康人群:1.8-3.36;心脑血管疾病危险人群:<2.59	M	2016-08-31 10:40:55	部分凝血活酶时间	33.1	S	20-40	M	2016-08-31 10:18:58	*总胆固醇	4.28	mmol/l	3.6-5.17	M	2016-08-31 10:40:55	D二聚体	110	ng/ml	0-115	M	2016-08-31 10:19:26	*葡萄糖	3.47	mmol/l	3.89-6.11	L	2016-08-31 10:40:55	C反应蛋白	70.31	mg/l	0-8	H	2016-09-02 09:16:05	凝血酶原时间(PT)	13.1	S	42992	M	2016-08-31 10:18:58
540	1000191756002	凝血酶原国际比值	0.8		0.7-1.3	M	2015-08-15 09:34:34	低密度脂蛋白	2.64	mmol/l	健康人群:1.8-3.36;心脑血管疾病危险人群:<2.59	M	2015-08-15 10:13:49	部分凝血活酶时间	28	S	22-45	M	2015-08-15 09:34:34	*总胆固醇	5.04	mmol/l	3.6-5.17	M	2015-08-15 10:13:49	D二聚体	30	ng/ml	0-115	M	2015-08-15 09:34:34	*葡萄糖	4.18	mmol/l	3.89-6.11	M	2015-08-15 10:42:22	C反应蛋白	0.81	mg/l	0-8	M	2015-09-21 11:41:20	凝血酶原时间(PT)	9.2	S	42992	M	2015-08-15 09:34:34
541	1000192444002	凝血酶原国际比值	0.96		0.7-1.3	M	2016-06-02 10:50:01	低密度脂蛋白	2.21	mmol/l	健康人群:1.8-3.36;心脑血管疾病危险人群:<2.59	M	2016-06-02 09:39:49	部分凝血活酶时间	26.1	S	22-45	M	2016-06-02 10:50:01	*总胆固醇	3.91	mmol/l	3.6-5.17	M	2016-06-02 09:39:49	D二聚体	50	ng/ml	0-115	M	2016-06-02 10:50:01	*葡萄糖	4.81	mmol/l	3.89-6.11	M	2016-06-02 09:39:49	C反应蛋白	0.23	mg/l	0-8	M	2016-06-02 10:19:28	凝血酶原时间(PT)	11.1	S	42992	M	2016-06-02 10:50:01
542	1000192525002	凝血酶原国际比值	0.98		0.7-1.3	M	2016-01-06 10:45:28	低密度脂蛋白	2.6	mmol/l	健康人群:1.8-3.36;心脑血管疾病危险人群:<2.59	M	2016-01-06 11:10:07	部分凝血活酶时间	25.9	S	22-45	M	2016-01-06 10:45:28	*总胆固醇	5.01	mmol/l	3.6-5.17	M	2016-01-06 11:10:07	D二聚体	40	ng/ml	0-115	M	2016-01-06 10:45:28	*葡萄糖	5.91	mmol/l	3.89-6.11	M	2016-01-06 11:10:07	C反应蛋白	1.21	mg/l	0-8	M	2016-01-06 11:10:07	凝血酶原时间(PT)	11.3	S	42992	M	2016-01-06 10:45:28
543	1000192735002	凝血酶原国际比值	0.96		0.7-1.3	M	2015-10-13 11:18:35	低密度脂蛋白	2.64	mmol/l	健康人群:1.8-3.36;心脑血管疾病危险人群:<2.59	M	2015-10-13 11:32:14	部分凝血活酶时间	26.3	S	22-45	M	2015-10-13 11:18:35	*总胆固醇	5.2	mmol/l	3.6-5.17	H	2015-10-13 11:32:14	D二聚体	40	ng/ml	0-115	M	2015-10-13 11:18:35	*葡萄糖	5.07	mmol/l	3.89-6.11	M	2015-10-13 11:32:14	C反应蛋白	1.39	mg/l	0-8	M	2015-10-13 11:32:14	凝血酶原时间(PT)	11.1	S	42992	M	2015-10-13 11:18:35
544	1000192815005	凝血酶原国际比值	1.08		0.7-1.3	M	2014-10-31 10:51:55	低密度脂蛋白	2.2	mmol/l	健康人群:1.8-3.36;心脑血管疾病危险人群:<2.59	M	2014-10-31 09:27:08	部分凝血活酶时间	38	S	22-45	M	2014-10-31 10:51:55	*总胆固醇	3.88	mmol/l	3.6-5.17	M	2014-10-31 09:27:08	D二聚体	350	ng/ml	0-115	H	2014-10-31 10:51:55	*葡萄糖	5.05	mmol/l	3.89-6.11	M	2014-10-31 09:27:08	C反应蛋白	17.73	mg/l	0-8	H	2014-10-31 09:27:08	凝血酶原时间(PT)	12.4	S	42992	M	2014-10-31 10:51:55
545	1000192860002	凝血酶原国际比值	1.05		0.7-1.3	M	2014-08-26 10:49:55	低密度脂蛋白	2.81	mmol/l	健康人群:1.8-3.36;心脑血管疾病危险人群:<2.59	M	2014-08-26 09:17:00	部分凝血活酶时间	28.7	S	22-45	M	2014-08-26 11:38:47	*总胆固醇	4.73	mmol/l	3.6-5.17	M	2014-08-26 09:17:00	D二聚体	4370	ng/ml	0-115	H	2014-08-26 10:49:55	*葡萄糖	5.72	mmol/l	3.89-6.11	M	2014-08-26 09:17:00	C反应蛋白	18.34	mg/l	0-8	H	2014-08-26 10:18:37	凝血酶原时间(PT)	12.1	S	42992	M	2014-08-26 10:49:55
546	1000192979002	凝血酶原国际比值	0.88		0.7-1.3	M	2015-03-18 10:39:37	低密度脂蛋白	2.44	mmol/l	健康人群:1.8-3.36;心脑血管疾病危险人群:<2.59	M	2015-03-18 08:50:27	部分凝血活酶时间	24.3	S	22-45	M	2015-03-18 10:39:37	*总胆固醇	4.33	mmol/l	3.6-5.17	M	2015-03-18 08:50:27	D二聚体	250	ng/ml	0-115	H	2015-03-18 10:43:59	*葡萄糖	8.71	mmol/l	3.89-6.11	H	2015-03-18 08:50:27	C反应蛋白	12.6	mg/l	0-8	H	2015-04-07 13:07:13	凝血酶原时间(PT)	10.1	S	42992	M	2015-03-18 10:39:37
547	1000193143003	凝血酶原国际比值	1.01		0.7-1.3	M	2015-01-23 13:22:07	低密度脂蛋白	2.73	mmol/l	健康人群:1.8-3.36;心脑血管疾病危险人群:<2.59	M	2015-01-23 13:12:29	部分凝血活酶时间	26.8	S	22-45	M	2015-01-23 13:22:07	*总胆固醇	4.88	mmol/l	3.6-5.17	M	2015-01-23 13:12:29	D二聚体	89	ng/ml	0-115	M	2015-01-23 13:22:07	*葡萄糖	4.89	mmol/l	3.89-6.11	M	2015-01-23 13:12:29	C反应蛋白	1.99	mg/l	0-8	M	2015-01-23 13:12:29	凝血酶原时间(PT)	11.6	S	42992	M	2015-01-23 13:22:07
548	1000193272003	凝血酶原国际比值	0.9		0.7-1.3	M	2015-05-25 12:00:42	低密度脂蛋白	2.28	mmol/l	健康人群:1.8-3.36;心脑血管疾病危险人群:<2.59	M	2015-05-25 11:55:27	部分凝血活酶时间	37.8	S	22-45	M	2015-05-25 11:49:55	*总胆固醇	4.08	mmol/l	3.6-5.17	M	2015-05-25 11:55:27	D二聚体	311	ng/ml	0-115	H	2015-05-25 11:51:35	*葡萄糖	5.04	mmol/l	3.89-6.11	M	2015-05-25 11:55:27	C反应蛋白	6.96	mg/l	0-8	M	2015-05-25 11:55:27	凝血酶原时间(PT)	11.8	S	43023	M	2015-05-25 12:00:42
549	1000193337003	凝血酶原国际比值	0.91		0.7-1.3	M	2016-05-21 10:10:29	低密度脂蛋白	3.06	mmol/l	健康人群:1.8-3.36;心脑血管疾病危险人群:<2.59	M	2016-05-21 09:32:46	部分凝血活酶时间	29	S	22-45	M	2016-05-21 10:10:29	*总胆固醇	5.15	mmol/l	3.6-5.17	M	2016-05-21 09:32:46	D二聚体	70	ng/ml	0-115	M	2016-05-21 10:10:29	*葡萄糖	4.93	mmol/l	3.89-6.11	M	2016-05-21 09:32:46	C反应蛋白	0.76	mg/l	0-8	M	2016-05-21 09:32:46	凝血酶原时间(PT)	10.5	S	42992	M	2016-05-21 10:10:29
550	1000193591003	凝血酶原国际比值	1.26		0.7-1.3	M	2015-07-19 09:11:15	低密度脂蛋白	1.92	mmol/l	健康人群:1.8-3.36;心脑血管疾病危险人群:<2.59	M	2015-07-19 09:19:46	部分凝血活酶时间	44.5	S	22-45	M	2015-07-19 09:11:15	*总胆固醇	3.72	mmol/l	3.6-5.17	M	2015-07-19 09:19:46	D二聚体	1300	ng/ml	0-115	H	2015-08-23 06:33:53	*葡萄糖	5.41	mmol/l	3.89-6.11	M	2015-07-19 09:19:46	C反应蛋白	161.72	mg/l	0-8	H	2015-07-19 09:19:46	凝血酶原时间(PT)	14.4	S	42992	H	2015-07-19 09:11:15
551	1000193821003	凝血酶原国际比值	0.87		0.7-1.3	M	2015-09-07 09:27:35	低密度脂蛋白	1.73	mmol/l	健康人群:1.8-3.36;心脑血管疾病危险人群:<2.59	M	2015-09-07 09:25:32	部分凝血活酶时间	31.7	S	22-45	M	2015-09-07 09:12:50	*总胆固醇	3.73	mmol/l	3.6-5.17	M	2015-09-07 09:25:32	D二聚体	127	ng/ml	0-115	H	2015-09-07 08:50:44	*葡萄糖	5.83	mmol/l	3.89-6.11	M	2015-09-07 09:25:32	C反应蛋白	2.18	mg/l	0-8	M	2015-09-07 10:20:13	凝血酶原时间(PT)	11.5	S	43023	M	2015-09-07 09:27:35
552	1000193945002	凝血酶原国际比值	0.86		0.7-1.3	M	2016-03-22 10:48:18	低密度脂蛋白	3.46	mmol/l	健康人群:1.8-3.36;心脑血管疾病危险人群:<2.59	M	2016-03-22 09:45:59	部分凝血活酶时间	22.4	S	22-45	M	2016-03-22 10:48:18	*总胆固醇	6.38	mmol/l	3.6-5.17	H	2016-03-22 09:45:59	D二聚体	89	ng/ml	0-115	M	2016-03-22 10:48:18	*葡萄糖	5.39	mmol/l	3.89-6.11	M	2016-03-22 09:45:59	C反应蛋白	0.53	mg/l	0-8	M	2016-03-22 09:45:59	凝血酶原时间(PT)	9.9	S	42992	M	2016-03-22 10:48:18
553	1000193980002	凝血酶原国际比值	0.97		0.7-1.3	M	2015-12-19 10:38:15	低密度脂蛋白	1.83	mmol/l	健康人群:1.8-3.36;心脑血管疾病危险人群:<2.59	M	2015-12-19 09:20:49	部分凝血活酶时间	33.6	S	22-45	M	2015-12-19 10:38:15	*总胆固醇	3.79	mmol/l	3.6-5.17	M	2015-12-19 09:20:49	D二聚体	2730	ng/ml	0-115	H	2015-12-19 10:38:15	*葡萄糖	5.45	mmol/l	3.89-6.11	M	2015-12-19 09:20:49	C反应蛋白	13.09	mg/l	0-8	H	2015-12-19 09:20:49	凝血酶原时间(PT)	11.2	S	42992	M	2015-12-19 10:38:15
554	1000193980004	凝血酶原国际比值	0.98		0.7-1.3	M	2016-05-24 12:02:32	低密度脂蛋白	2.66	mmol/l	健康人群:1.8-3.36;心脑血管疾病危险人群:<2.59	M	2016-05-24 11:51:39	部分凝血活酶时间	29.2	S	22-45	M	2016-05-24 12:02:32	*总胆固醇	4.94	mmol/l	3.6-5.17	M	2016-05-24 11:51:39	D二聚体	390	ng/ml	0-115	H	2016-05-24 12:02:32	*葡萄糖	5.97	mmol/l	3.89-6.11	M	2016-05-24 11:51:39	C反应蛋白	5.55	mg/l	0-8	M	2016-05-24 11:51:39	凝血酶原时间(PT)	11.3	S	42992	M	2016-05-24 12:02:32
555	1000193985003	凝血酶原国际比值	1.07		0.7-1.3	M	2016-06-29 10:00:50	低密度脂蛋白	3.19	mmol/l	健康人群:1.8-3.36;心脑血管疾病危险人群:<2.59	M	2016-06-29 10:16:52	部分凝血活酶时间	28.6	S	20-40	M	2016-06-29 10:00:50	*总胆固醇	5.05	mmol/l	3.6-5.17	M	2016-06-29 10:16:52	D二聚体	290	ng/ml	0-115	H	2016-06-29 10:00:50	*葡萄糖	10.42	mmol/l	3.89-6.11	H	2016-06-29 10:16:52	C反应蛋白	269.26	mg/l	0-8	H	2016-06-29 10:24:01	凝血酶原时间(PT)	12.3	S	42992	M	2016-06-29 10:00:50
556	1000194062002	凝血酶原国际比值	1.12		0.7-1.3	M	2016-09-22 10:58:09	低密度脂蛋白	1.88	mmol/l	健康人群:1.8-3.36;心脑血管疾病危险人群:<2.59	M	2016-09-22 09:31:38	部分凝血活酶时间	35.6	S	20-40	M	2016-09-22 10:58:09	*总胆固醇	3.7	mmol/l	3.6-5.17	M	2016-09-22 09:31:38	D二聚体	90	ng/ml	0-115	M	2016-09-22 10:58:09	*葡萄糖	4.33	mmol/l	3.89-6.11	M	2016-09-22 09:31:38	C反应蛋白	1.03	mg/l	0-8	M	2016-09-22 09:45:15	凝血酶原时间(PT)	12.9	S	42992	M	2016-09-22 10:58:09
557	1000194230003	凝血酶原国际比值	0.92		0.7-1.3	M	2016-05-30 09:56:30	低密度脂蛋白	2.29	mmol/l	健康人群:1.8-3.36;心脑血管疾病危险人群:<2.59	M	2016-05-30 09:14:46	部分凝血活酶时间	28	S	22-45	M	2016-05-30 09:56:30	*总胆固醇	4.45	mmol/l	3.6-5.17	M	2016-05-30 09:14:46	D二聚体	30330	ng/ml	0-115	H	2016-05-30 09:56:30	*葡萄糖	5.83	mmol/l	3.89-6.11	M	2016-05-30 09:14:46	C反应蛋白	8.24	mg/l	0-8	H	2016-06-11 10:55:08	凝血酶原时间(PT)	10.6	S	42992	M	2016-05-30 09:56:30
558	1000194235002	凝血酶原国际比值	0.97		0.7-1.3	M	2015-03-17 08:51:47	低密度脂蛋白	3.07	mmol/l	健康人群:1.8-3.36;心脑血管疾病危险人群:<2.59	M	2015-03-17 10:40:40	部分凝血活酶时间	27.4	S	22-45	M	2015-03-17 08:51:47	*总胆固醇	4.95	mmol/l	3.6-5.17	M	2015-03-17 10:40:40	D二聚体	60	ng/ml	0-115	M	2015-03-17 08:51:47	*葡萄糖	6.47	mmol/l	3.89-6.11	H	2015-03-17 10:40:40	C反应蛋白	3.44	mg/l	0-8	M	2015-03-17 10:42:41	凝血酶原时间(PT)	11.1	S	42992	M	2015-03-17 08:51:47
559	1000194538002	凝血酶原国际比值	0.96		0.7-1.3	M	2016-04-06 11:34:25	低密度脂蛋白	3.72	mmol/l	健康人群:1.8-3.36;心脑血管疾病危险人群:<2.59	M	2016-04-06 11:52:06	部分凝血活酶时间	27.3	S	22-45	M	2016-04-06 11:34:25	*总胆固醇	6.71	mmol/l	3.6-5.17	H	2016-04-06 11:52:06	D二聚体	140	ng/ml	0-115	H	2016-04-06 11:34:25	*葡萄糖	5.1	mmol/l	3.89-6.11	M	2016-04-06 11:52:06	C反应蛋白	0.59	mg/l	0-8	M	2016-04-06 11:52:06	凝血酶原时间(PT)	11	S	42992	M	2016-04-06 11:34:25
560	1000194607002	凝血酶原国际比值	0.92		0.7-1.3	M	2015-09-24 09:53:12	低密度脂蛋白	4.3	mmol/l	健康人群:1.8-3.36;心脑血管疾病危险人群:<2.59	M	2015-09-24 09:28:23	部分凝血活酶时间	33.7	S	22-45	M	2015-09-24 09:53:12	*总胆固醇	7.37	mmol/l	3.6-5.17	H	2015-09-24 09:28:23	D二聚体	190	ng/ml	0-115	H	2015-09-24 09:53:12	*葡萄糖	5.02	mmol/l	3.89-6.11	M	2015-09-24 09:28:23	C反应蛋白	2.01	mg/l	0-8	M	2015-09-24 09:28:23	凝血酶原时间(PT)	10.6	S	42992	M	2015-09-24 09:53:12
561	1000194667003	凝血酶原国际比值	1		0.7-1.3	M	2016-01-10 09:46:23	低密度脂蛋白	2.87	mmol/l	健康人群:1.8-3.36;心脑血管疾病危险人群:<2.59	M	2016-01-10 09:24:54	部分凝血活酶时间	33.2	S	22-45	M	2016-01-10 09:47:43	*总胆固醇	4.9	mmol/l	3.6-5.17	M	2016-01-10 09:24:54	D二聚体	2153	ng/ml	0-115	H	2016-01-10 09:39:30	*葡萄糖	8.6	mmol/l	3.89-6.11	H	2016-01-10 09:24:54	C反应蛋白	27.78	mg/l	0-8	H	2016-01-13 08:50:19	凝血酶原时间(PT)	13.1	S	43023	M	2016-01-10 09:46:23
562	1000194762002	凝血酶原国际比值	0.9		0.7-1.3	M	2016-03-06 10:38:12	低密度脂蛋白	2.47	mmol/l	健康人群:1.8-3.36;心脑血管疾病危险人群:<2.59	M	2016-03-06 10:34:24	部分凝血活酶时间	28.4	S	22-45	M	2016-03-06 10:38:12	*总胆固醇	5.56	mmol/l	3.6-5.17	H	2016-03-06 10:34:24	D二聚体	4380	ng/ml	0-115	H	2016-03-06 10:38:12	*葡萄糖	5.41	mmol/l	3.89-6.11	M	2016-03-06 10:34:24	C反应蛋白	4.27	mg/l	0-8	M	2016-03-06 10:34:24	凝血酶原时间(PT)	10.4	S	42992	M	2016-03-06 10:38:12
563	1000194813003	凝血酶原国际比值	0.9		0.7-1.3	M	2015-06-03 16:29:07	低密度脂蛋白	2.29	mmol/l	健康人群:1.8-3.36;心脑血管疾病危险人群:<2.59	M	2015-06-03 16:28:57	部分凝血活酶时间	30.2	S	22-45	M	2015-06-03 16:25:00	*总胆固醇	5.1	mmol/l	3.6-5.17	M	2015-06-03 16:28:57	D二聚体	154	ng/ml	0-115	H	2015-06-03 16:25:56	*葡萄糖	5.1	mmol/l	3.89-6.11	M	2015-06-03 16:28:57	C反应蛋白	0.6	mg/l	0-8	M	2015-06-03 16:28:57	凝血酶原时间(PT)	11.9	S	43023	M	2015-06-03 16:29:07
564	1000195144002	凝血酶原国际比值	0.96		0.7-1.3	M	2015-02-28 10:44:00	低密度脂蛋白	2.89	mmol/l	健康人群:1.8-3.36;心脑血管疾病危险人群:<2.59	M	2015-02-28 10:22:51	部分凝血活酶时间	32.3	S	22-45	M	2015-02-28 10:44:00	*总胆固醇	5.03	mmol/l	3.6-5.17	M	2015-02-28 10:22:51	D二聚体	200	ng/ml	0-115	H	2015-02-28 10:44:00	*葡萄糖	14.89	mmol/l	3.89-6.11	H	2015-02-28 10:22:51	C反应蛋白	2.44	mg/l	0-8	M	2015-02-28 10:24:05	凝血酶原时间(PT)	11	S	42992	M	2015-02-28 10:44:00
565	1000195468002	凝血酶原国际比值	1.01		0.7-1.3	M	2015-11-24 11:37:06	低密度脂蛋白	2.15	mmol/l	健康人群:1.8-3.36;心脑血管疾病危险人群:<2.59	M	2015-11-24 10:07:34	部分凝血活酶时间	40.1	S	22-45	M	2015-11-24 11:38:37	*总胆固醇	5.27	mmol/l	3.6-5.17	H	2015-11-24 10:07:34	D二聚体	96	ng/ml	0-115	M	2015-11-24 11:10:18	*葡萄糖	4.96	mmol/l	3.89-6.11	M	2015-11-24 10:07:34	C反应蛋白	0.36	mg/l	0-8	M	2015-11-24 10:07:34	凝血酶原时间(PT)	13.2	S	43023	M	2015-11-24 11:37:06
566	1000195580002	凝血酶原国际比值	0.92		0.7-1.3	M	2016-07-12 13:06:35	低密度脂蛋白	3.44	mmol/l	健康人群:1.8-3.36;心脑血管疾病危险人群:<2.59	M	2016-07-12 12:36:20	部分凝血活酶时间	23.8	S	20-40	M	2016-07-12 13:06:35	*总胆固醇	6.78	mmol/l	3.6-5.17	H	2016-07-12 12:36:20	D二聚体	170	ng/ml	0-115	H	2016-07-12 13:06:35	*葡萄糖	6	mmol/l	3.89-6.11	M	2016-07-12 12:36:20	C反应蛋白	1.29	mg/l	0-8	M	2016-07-12 12:12:07	凝血酶原时间(PT)	10.6	S	42992	M	2016-07-12 13:06:35
567	1000195697002	凝血酶原国际比值	0.93		0.7-1.3	M	2015-04-29 11:05:26	低密度脂蛋白	3.22	mmol/l	健康人群:1.8-3.36;心脑血管疾病危险人群:<2.59	M	2015-04-29 11:26:40	部分凝血活酶时间	29.9	S	22-45	M	2015-04-29 11:05:26	*总胆固醇	5.32	mmol/l	3.6-5.17	H	2015-04-29 11:26:40	D二聚体	220	ng/ml	0-115	H	2015-04-29 11:05:26	*葡萄糖	5.93	mmol/l	3.89-6.11	M	2015-04-29 11:26:40	C反应蛋白	0.5	mg/l	0-8	M	2015-04-29 11:26:40	凝血酶原时间(PT)	10.7	S	42992	M	2015-04-29 11:05:26
568	1000195722002	凝血酶原国际比值	0.89		0.7-1.3	M	2014-11-17 07:18:51	低密度脂蛋白	2.38	mmol/l	健康人群:1.8-3.36;心脑血管疾病危险人群:<2.59	M	2014-11-17 07:13:07	部分凝血活酶时间	23.7	S	22-45	M	2014-11-17 07:18:51	*总胆固醇	5.4	mmol/l	3.6-5.17	H	2014-11-17 07:13:07	D二聚体	100	ng/ml	0-115	M	2014-11-17 07:18:51	*葡萄糖	4.9	mmol/l	3.89-6.11	M	2014-11-17 07:13:07	C反应蛋白	0	mg/l	0-8	M	2014-11-17 07:13:07	凝血酶原时间(PT)	10.2	S	42992	M	2014-11-17 07:18:51
569	1000195805002	凝血酶原国际比值	0.84		0.7-1.3	M	2015-06-03 11:19:03	低密度脂蛋白	2.41	mmol/l	健康人群:1.8-3.36;心脑血管疾病危险人群:<2.59	M	2015-06-03 11:43:09	部分凝血活酶时间	27.5	S	22-45	M	2015-06-03 11:19:03	*总胆固醇	4.65	mmol/l	3.6-5.17	M	2015-06-03 11:43:09	D二聚体	70	ng/ml	0-115	M	2015-06-03 11:19:03	*葡萄糖	4.77	mmol/l	3.89-6.11	M	2015-06-03 11:43:09	C反应蛋白	2.05	mg/l	0-8	M	2015-06-03 12:42:24	凝血酶原时间(PT)	9.7	S	42992	M	2015-06-03 11:19:03
570	1000195817002	凝血酶原国际比值	0.91		0.7-1.3	M	2014-12-03 10:19:55	低密度脂蛋白	1.92	mmol/l	健康人群:1.8-3.36;心脑血管疾病危险人群:<2.59	M	2014-12-03 08:55:21	部分凝血活酶时间	36.5	S	22-45	M	2014-12-03 10:16:29	*总胆固醇	3.66	mmol/l	3.6-5.17	M	2014-12-03 08:55:21	D二聚体	268	ng/ml	0-115	H	2014-12-03 09:39:41	*葡萄糖	5.88	mmol/l	3.89-6.11	M	2014-12-03 08:55:21	C反应蛋白	1.6	mg/l	0-8	M	2014-12-03 08:55:21	凝血酶原时间(PT)	12	S	43023	M	2014-12-03 10:19:55
571	1000196250002	凝血酶原国际比值	1.02		0.7-1.3	M	2014-12-11 09:05:24	低密度脂蛋白	2.97	mmol/l	健康人群:1.8-3.36;心脑血管疾病危险人群:<2.59	M	2014-12-11 08:47:59	部分凝血活酶时间	27.8	S	22-45	M	2014-12-11 09:05:24	*总胆固醇	4.86	mmol/l	3.6-5.17	M	2014-12-11 08:47:59	D二聚体	200	ng/ml	0-115	H	2014-12-11 09:05:24	*葡萄糖	5.51	mmol/l	3.89-6.11	M	2014-12-11 08:47:59	C反应蛋白	7.55	mg/l	0-8	M	2014-12-15 11:36:52	凝血酶原时间(PT)	11.7	S	42992	M	2014-12-11 09:05:24
572	1000196469002	凝血酶原国际比值	0.94		0.7-1.3	M	2016-05-11 11:21:09	低密度脂蛋白	1.78	mmol/l	健康人群:1.8-3.36;心脑血管疾病危险人群:<2.59	M	2016-05-11 10:16:35	部分凝血活酶时间	26.7	S	22-45	M	2016-05-11 11:21:09	*总胆固醇	3.37	mmol/l	3.6-5.17	L	2016-05-11 10:16:35	D二聚体	950	ng/ml	0-115	H	2016-05-11 11:21:09	*葡萄糖	6.27	mmol/l	3.89-6.11	H	2016-05-11 10:16:35	C反应蛋白	0.39	mg/l	0-8	M	2016-05-11 10:16:35	凝血酶原时间(PT)	10.8	S	42992	M	2016-05-11 11:21:09
573	1000196482002	凝血酶原国际比值	1.07		0.7-1.3	M	2017-04-06 10:08:12	低密度脂蛋白	2.14	mmol/l	健康人群:1.8-3.36;心脑血管疾病危险人群:<2.59	M	2017-04-06 10:23:13	部分凝血活酶时间	27.9	S	20-40	M	2017-04-06 10:08:12	*总胆固醇	3.66	mmol/l	3.6-5.17	M	2017-04-06 10:23:13	D二聚体	130	ng/ml	0-115	H	2017-04-06 10:08:12	*葡萄糖	12.85	mmol/l	3.89-6.11	H	2017-04-06 10:23:13	C反应蛋白	47.19	mg/l	0-8	H	2017-04-06 10:23:13	凝血酶原时间(PT)	12.3	S	42992	M	2017-04-06 10:08:12
574	1000196674004	凝血酶原国际比值	0.99		0.7-1.3	M	2016-04-07 14:23:53	低密度脂蛋白	1.9	mmol/l	健康人群:1.8-3.36;心脑血管疾病危险人群:<2.59	M	2016-04-07 13:58:40	部分凝血活酶时间	37.5	S	22-45	M	2016-04-07 14:32:40	*总胆固醇	4.69	mmol/l	3.6-5.17	M	2016-04-07 13:58:40	D二聚体	27	ng/ml	0-115	M	2016-04-07 14:29:04	*葡萄糖	4.77	mmol/l	3.89-6.11	M	2016-04-07 13:58:40	C反应蛋白	125.11	mg/l	0-8	H	2016-04-14 12:08:36	凝血酶原时间(PT)	13.4	S	43023	M	2016-04-07 14:23:53
575	1000196733002	凝血酶原国际比值	0.93		0.7-1.3	M	2015-05-03 10:09:07	低密度脂蛋白	1.85	mmol/l	健康人群:1.8-3.36;心脑血管疾病危险人群:<2.59	M	2015-05-03 09:44:46	部分凝血活酶时间	28.7	S	22-45	M	2015-05-03 10:12:38	*总胆固醇	4.4	mmol/l	3.6-5.17	M	2015-05-03 09:44:46	D二聚体	6250	ng/ml	0-115	H	2015-05-03 09:50:20	*葡萄糖	5.5	mmol/l	3.89-6.11	M	2015-05-03 09:44:46	C反应蛋白	16.53	mg/l	0-8	H	2015-05-03 11:23:37	凝血酶原时间(PT)	12.2	S	43023	M	2015-05-03 10:09:07
576	1000196924002	凝血酶原国际比值	1.03		0.7-1.3	M	2014-10-16 10:20:15	低密度脂蛋白	2.54	mmol/l	健康人群:1.8-3.36;心脑血管疾病危险人群:<2.59	M	2014-10-16 09:49:49	部分凝血活酶时间	31	S	22-45	M	2014-10-16 10:20:15	*总胆固醇	4.39	mmol/l	3.6-5.17	M	2014-10-16 09:49:49	D二聚体	290	ng/ml	0-115	H	2014-10-16 10:29:33	*葡萄糖	5.07	mmol/l	3.89-6.11	M	2014-10-16 09:49:49	C反应蛋白	14.34	mg/l	0-8	H	2014-10-31 11:12:41	凝血酶原时间(PT)	11.9	S	42992	M	2014-10-16 10:20:15
577	1000197171005	凝血酶原国际比值	1.11		0.7-1.3	M	2016-09-13 15:18:15	低密度脂蛋白	2.67	mmol/l	健康人群:1.8-3.36;心脑血管疾病危险人群:<2.59	M	2016-09-13 14:40:51	部分凝血活酶时间	24.6	S	20-40	M	2016-09-13 15:08:09	*总胆固醇	4.7	mmol/l	3.6-5.17	M	2016-09-13 14:40:51	D二聚体	1475	ng/ml	0-115	H	2016-09-13 15:12:58	*葡萄糖	5.6	mmol/l	3.89-6.11	M	2016-09-13 14:40:51	C反应蛋白	21.1	mg/l	0-8	H	2016-09-13 14:40:51	凝血酶原时间(PT)	13.7	S	43023	M	2016-09-13 15:18:15
578	1000197174003	凝血酶原国际比值	1.05		0.7-1.3	M	2015-10-02 14:00:08	低密度脂蛋白	1.4	mmol/l	健康人群:1.8-3.36;心脑血管疾病危险人群:<2.59	M	2015-10-02 13:54:05	部分凝血活酶时间	50.3	S	22-45	H	2015-10-02 13:57:08	*总胆固醇	4.2	mmol/l	3.6-5.17	M	2015-10-02 13:54:05	D二聚体	1627	ng/ml	0-115	H	2015-10-02 13:51:26	*葡萄糖	5.9	mmol/l	3.89-6.11	M	2015-10-02 13:54:05	C反应蛋白	188.23	mg/l	0-8	H	2015-10-07 09:36:25	凝血酶原时间(PT)	13.7	S	43023	M	2015-10-02 14:00:08
579	1000197787002	凝血酶原国际比值	0.98		0.7-1.3	M	2016-10-20 09:36:05	低密度脂蛋白	1.73	mmol/l	健康人群:1.8-3.36;心脑血管疾病危险人群:<2.59	M	2016-10-20 09:27:03	部分凝血活酶时间	23.4	S	20-40	M	2016-10-20 09:36:05	*总胆固醇	3.94	mmol/l	3.6-5.17	M	2016-10-20 09:27:03	D二聚体	150	ng/ml	0-115	H	2016-10-20 09:36:05	*葡萄糖	5.48	mmol/l	3.89-6.11	M	2016-10-20 09:27:03	C反应蛋白	1.86	mg/l	0-8	M	2016-10-20 09:27:03	凝血酶原时间(PT)	11.3	S	42992	M	2016-10-20 09:36:05
580	1000197852002	凝血酶原国际比值	1.03		0.7-1.3	M	2014-09-13 11:18:09	低密度脂蛋白	1.67	mmol/l	健康人群:1.8-3.36;心脑血管疾病危险人群:<2.59	M	2014-09-13 09:45:27	部分凝血活酶时间	22.6	S	22-45	M	2014-09-13 11:18:09	*总胆固醇	3.3	mmol/l	3.6-5.17	L	2014-09-13 09:45:27	D二聚体	140	ng/ml	0-115	H	2014-09-13 11:18:09	*葡萄糖	5.19	mmol/l	3.89-6.11	M	2014-09-13 09:45:27	C反应蛋白	1.84	mg/l	0-8	M	2014-09-13 09:45:27	凝血酶原时间(PT)	11.9	S	42992	M	2014-09-13 11:18:09
581	1000198077002	凝血酶原国际比值	0.9		0.7-1.3	M	2015-07-14 11:01:28	低密度脂蛋白	2.27	mmol/l	健康人群:1.8-3.36;心脑血管疾病危险人群:<2.59	M	2015-07-14 09:42:08	部分凝血活酶时间	33.8	S	22-45	M	2015-07-14 11:01:28	*总胆固醇	4.55	mmol/l	3.6-5.17	M	2015-07-14 09:42:08	D二聚体	710	ng/ml	0-115	H	2015-07-14 11:01:28	*葡萄糖	5.08	mmol/l	3.89-6.11	M	2015-07-14 09:42:08	C反应蛋白	122.28	mg/l	0-8	H	2015-07-14 09:55:23	凝血酶原时间(PT)	10.4	S	42992	M	2015-07-14 11:01:28
582	1000198156002	凝血酶原国际比值	0.91		0.7-1.3	M	2015-09-26 10:18:41	低密度脂蛋白	2.84	mmol/l	健康人群:1.8-3.36;心脑血管疾病危险人群:<2.59	M	2015-09-26 09:50:03	部分凝血活酶时间	23.5	S	22-45	M	2015-09-26 10:18:41	*总胆固醇	4.72	mmol/l	3.6-5.17	M	2015-09-26 09:50:03	D二聚体	210	ng/ml	0-115	H	2015-09-26 10:45:20	*葡萄糖	5.4	mmol/l	3.89-6.11	M	2015-09-26 09:50:03	C反应蛋白	0.81	mg/l	0-8	M	2015-09-26 09:50:03	凝血酶原时间(PT)	10.5	S	42992	M	2015-09-26 10:18:41
583	1000198320002	凝血酶原国际比值	0.96		0.7-1.3	M	2016-09-05 11:17:35	低密度脂蛋白	1.86	mmol/l	健康人群:1.8-3.36;心脑血管疾病危险人群:<2.59	M	2016-09-05 10:58:39	部分凝血活酶时间	21.7	S	20-40	M	2016-09-05 11:17:35	*总胆固醇	4.8	mmol/l	3.6-5.17	M	2016-09-05 10:58:39	D二聚体	40	ng/ml	0-115	M	2016-09-05 11:17:35	*葡萄糖	5.22	mmol/l	3.89-6.11	M	2016-09-05 10:58:39	C反应蛋白	8.4	mg/l	0-8	H	2016-09-13 10:50:30	凝血酶原时间(PT)	11.1	S	42992	M	2016-09-05 11:17:35
584	1000198322002	凝血酶原国际比值	0.93		0.7-1.3	M	2015-10-21 11:06:25	低密度脂蛋白	1.83	mmol/l	健康人群:1.8-3.36;心脑血管疾病危险人群:<2.59	M	2015-10-21 11:28:00	部分凝血活酶时间	30.2	S	22-45	M	2015-10-21 11:06:25	*总胆固醇	4.52	mmol/l	3.6-5.17	M	2015-10-21 11:28:00	D二聚体	61	ng/ml	0-115	M	2015-10-21 11:12:00	*葡萄糖	5.05	mmol/l	3.89-6.11	M	2015-10-21 11:28:00	C反应蛋白	5.84	mg/l	0-8	M	2015-10-21 11:28:00	凝血酶原时间(PT)	12.2	S	43023	M	2015-10-21 11:06:25
585	1000198354003	凝血酶原国际比值	0.96		0.7-1.3	M	2015-11-27 11:44:32	低密度脂蛋白	1.89	mmol/l	健康人群:1.8-3.36;心脑血管疾病危险人群:<2.59	M	2015-11-27 11:37:04	部分凝血活酶时间	24	S	22-45	M	2015-11-27 11:44:32	*总胆固醇	3.99	mmol/l	3.6-5.17	M	2015-11-27 11:37:04	D二聚体	30	ng/ml	0-115	M	2015-11-27 11:44:32	*葡萄糖	5.26	mmol/l	3.89-6.11	M	2015-11-27 11:37:04	C反应蛋白	0.16	mg/l	0-8	M	2015-11-27 12:05:58	凝血酶原时间(PT)	11.1	S	42992	M	2015-11-27 11:44:32
586	1000198393002	凝血酶原国际比值	1.02		0.7-1.3	M	2015-01-21 09:54:14	低密度脂蛋白	2.9	mmol/l	健康人群:1.8-3.36;心脑血管疾病危险人群:<2.59	M	2015-01-21 09:26:21	部分凝血活酶时间	37.1	S	22-45	M	2015-01-21 09:54:14	*总胆固醇	4.75	mmol/l	3.6-5.17	M	2015-01-21 09:26:21	D二聚体	89	ng/ml	0-115	M	2015-01-21 09:54:14	*葡萄糖	5.32	mmol/l	3.89-6.11	M	2015-01-21 09:26:21	C反应蛋白	1.27	mg/l	0-8	M	2015-01-21 09:26:32	凝血酶原时间(PT)	11.7	S	42992	M	2015-01-21 09:54:14
587	1000198393003	凝血酶原国际比值	1.15		0.7-1.3	M	2016-08-20 11:05:30	低密度脂蛋白	2.65	mmol/l	健康人群:1.8-3.36;心脑血管疾病危险人群:<2.59	M	2016-08-20 09:05:23	部分凝血活酶时间	42.4	S	22-45	M	2016-08-20 10:47:37	*总胆固醇	4.33	mmol/l	3.6-5.17	M	2016-08-20 09:05:23	D二聚体	71	ng/ml	0-115	M	2016-08-20 10:07:19	*葡萄糖	4.2	mmol/l	3.89-6.11	M	2016-08-20 09:05:23	C反应蛋白	0.32	mg/l	0-8	M	2016-08-20 09:18:45	凝血酶原时间(PT)	14.2	S	43023	M	2016-08-20 11:05:30
588	1000198677002	凝血酶原国际比值	0.9		0.7-1.3	M	2014-09-12 12:13:17	低密度脂蛋白	3.37	mmol/l	健康人群:1.8-3.36;心脑血管疾病危险人群:<2.59	M	2014-09-13 09:41:42	部分凝血活酶时间	29.9	S	22-45	M	2014-09-12 12:17:38	*总胆固醇	5.46	mmol/l	3.6-5.17	H	2014-09-13 09:41:42	D二聚体	389	ng/ml	0-115	H	2014-09-12 11:56:08	*葡萄糖	6.1	mmol/l	3.89-6.11	M	2014-09-13 09:41:42	C反应蛋白	13.74	mg/l	0-8	H	2014-09-13 09:41:42	凝血酶原时间(PT)	11.9	S	43023	M	2014-09-12 12:13:17
589	1000198776002	凝血酶原国际比值	1.12		0.7-1.3	M	2014-12-10 10:16:10	低密度脂蛋白	3.3	mmol/l	健康人群:1.8-3.36;心脑血管疾病危险人群:<2.59	M	2014-12-10 09:30:01	部分凝血活酶时间	26.2	S	22-45	M	2014-12-10 10:16:10	*总胆固醇	5.07	mmol/l	3.6-5.17	M	2014-12-10 09:30:01	D二聚体	620	ng/ml	0-115	H	2014-12-10 10:16:10	*葡萄糖	5.34	mmol/l	3.89-6.11	M	2014-12-10 09:30:01	C反应蛋白	1.28	mg/l	0-8	M	2014-12-10 09:30:01	凝血酶原时间(PT)	12.9	S	42992	M	2014-12-10 10:16:10
590	1000198793002	凝血酶原国际比值	0.89		0.7-1.3	M	2015-01-29 12:21:15	低密度脂蛋白	4.03	mmol/l	健康人群:1.8-3.36;心脑血管疾病危险人群:<2.59	M	2015-01-29 09:44:54	部分凝血活酶时间	40.2	S	22-45	M	2015-01-29 12:23:56	*总胆固醇	5.96	mmol/l	3.6-5.17	H	2015-01-29 09:44:54	D二聚体	60	ng/ml	0-115	M	2015-01-30 13:01:44	*葡萄糖	4.95	mmol/l	3.89-6.11	M	2015-01-29 09:44:54	C反应蛋白	2.82	mg/l	0-8	M	2015-01-30 12:58:16	凝血酶原时间(PT)	11.7	S	43023	M	2015-01-29 12:21:15
591	1000198804002	凝血酶原国际比值	1.14		0.7-1.3	M	2014-09-17 10:40:53	低密度脂蛋白	0.6	mmol/l	健康人群:1.8-3.36;心脑血管疾病危险人群:<2.59	M	2014-09-17 10:51:14	部分凝血活酶时间	31	S	22-45	M	2014-09-17 10:36:42	*总胆固醇	2.49	mmol/l	3.6-5.17	L	2014-09-17 10:51:14	D二聚体	192	ng/ml	0-115	H	2014-09-17 10:21:56	*葡萄糖	4.98	mmol/l	3.89-6.11	M	2014-09-17 10:51:14	C反应蛋白	5.03	mg/l	0-8	M	2014-09-17 10:51:14	凝血酶原时间(PT)	14.7	S	43023	M	2014-09-17 10:40:53
592	1000198845002	凝血酶原国际比值	0.87		0.7-1.3	M	2015-09-19 10:12:26	低密度脂蛋白	3.41	mmol/l	健康人群:1.8-3.36;心脑血管疾病危险人群:<2.59	M	2015-09-19 09:24:17	部分凝血活酶时间	31.1	S	22-45	M	2015-09-19 10:12:26	*总胆固醇	5.93	mmol/l	3.6-5.17	H	2015-09-19 09:24:17	D二聚体	60	ng/ml	0-115	M	2015-09-19 10:12:26	*葡萄糖	6.92	mmol/l	3.89-6.11	H	2015-09-19 09:24:17	C反应蛋白	1.35	mg/l	0-8	M	2015-10-06 11:10:15	凝血酶原时间(PT)	10	S	42992	M	2015-09-19 10:12:26
593	1000199265002	凝血酶原国际比值	0.77		0.7-1.3	M	2015-09-05 11:00:06	低密度脂蛋白	2.97	mmol/l	健康人群:1.8-3.36;心脑血管疾病危险人群:<2.59	M	2015-09-05 09:04:30	部分凝血活酶时间	23.3	S	22-45	M	2015-09-05 10:03:08	*总胆固醇	5.32	mmol/l	3.6-5.17	H	2015-09-05 09:04:30	D二聚体	110	ng/ml	0-115	M	2015-09-05 10:03:08	*葡萄糖	4.9	mmol/l	3.89-6.11	M	2015-09-05 09:04:30	C反应蛋白	0.53	mg/l	0-8	M	2015-09-05 09:04:30	凝血酶原时间(PT)	9	S	42992	M	2015-09-05 11:00:02
594	1000199352002	凝血酶原国际比值	0.93		0.7-1.3	M	2015-05-20 11:13:26	低密度脂蛋白	3.05	mmol/l	健康人群:1.8-3.36;心脑血管疾病危险人群:<2.59	M	2015-05-20 11:30:48	部分凝血活酶时间	31.2	S	22-45	M	2015-05-20 11:57:35	*总胆固醇	5.03	mmol/l	3.6-5.17	M	2015-05-20 11:30:48	D二聚体	210	ng/ml	0-115	H	2015-05-20 11:57:35	*葡萄糖	6.77	mmol/l	3.89-6.11	H	2015-05-20 11:30:48	C反应蛋白	1.53	mg/l	0-8	M	2015-05-20 11:29:41	凝血酶原时间(PT)	10.7	S	42992	M	2015-05-20 11:13:26
595	1000199417002	凝血酶原国际比值	0.99		0.7-1.3	M	2014-10-06 09:19:08	低密度脂蛋白	1.82	mmol/l	健康人群:1.8-3.36;心脑血管疾病危险人群:<2.59	M	2014-10-06 09:03:38	部分凝血活酶时间	23.8	S	22-45	M	2014-10-06 11:00:22	*总胆固醇	3.56	mmol/l	3.6-5.17	L	2014-10-06 09:03:38	D二聚体	420	ng/ml	0-115	H	2014-10-06 09:19:08	*葡萄糖	5.85	mmol/l	3.89-6.11	M	2014-10-06 09:03:38	C反应蛋白	5.68	mg/l	0-8	M	2014-10-06 09:03:38	凝血酶原时间(PT)	11.4	S	42992	M	2014-10-06 09:19:08
596	1000199486003	凝血酶原国际比值	0.97		0.7-1.3	M	2015-05-19 10:25:43	低密度脂蛋白	2.02	mmol/l	健康人群:1.8-3.36;心脑血管疾病危险人群:<2.59	M	2015-05-19 09:40:17	部分凝血活酶时间	22.8	S	22-45	M	2015-05-19 10:25:43	*总胆固醇	4	mmol/l	3.6-5.17	M	2015-05-19 09:40:17	D二聚体	550	ng/ml	0-115	H	2015-05-19 10:25:43	*葡萄糖	4.95	mmol/l	3.89-6.11	M	2015-05-19 09:40:17	C反应蛋白	5.77	mg/l	0-8	M	2015-05-19 09:40:17	凝血酶原时间(PT)	11.2	S	42992	M	2015-05-19 10:25:43
597	1000199556005	凝血酶原国际比值	1.3		0.7-1.3	M	2015-02-11 11:09:23	低密度脂蛋白	1.06	mmol/l	健康人群:1.8-3.36;心脑血管疾病危险人群:<2.59	M	2015-02-09 11:04:44	部分凝血活酶时间	52.7	S	22-45	H	2015-02-11 11:09:23	*总胆固醇	1.89	mmol/l	3.6-5.17	L	2015-02-09 11:04:44	D二聚体	660	ng/ml	0-115	H	2015-02-11 11:09:23	*葡萄糖	7.28	mmol/l	3.89-6.11	H	2015-02-09 11:04:44	C反应蛋白	385.21	mg/l	0-8	H	2015-02-08 19:49:09	凝血酶原时间(PT)	15	S	42992	H	2015-02-11 11:09:23
598	1000199723003	凝血酶原国际比值	1.03		0.7-1.3	M	2015-02-09 09:27:54	低密度脂蛋白	2.98	mmol/l	健康人群:1.8-3.36;心脑血管疾病危险人群:<2.59	M	2015-02-09 10:26:53	部分凝血活酶时间	27.9	S	22-45	M	2015-02-09 09:27:54	*总胆固醇	4.99	mmol/l	3.6-5.17	M	2015-02-09 10:26:53	D二聚体	40	ng/ml	0-115	M	2015-02-09 09:27:54	*葡萄糖	5.27	mmol/l	3.89-6.11	M	2015-02-09 10:26:53	C反应蛋白	3.13	mg/l	0-8	M	2015-02-09 10:26:53	凝血酶原时间(PT)	11.9	S	42992	M	2015-02-09 09:27:54
599	1000199757003	凝血酶原国际比值	0.93		0.7-1.3	M	2015-05-17 11:49:22	低密度脂蛋白	2.44	mmol/l	健康人群:1.8-3.36;心脑血管疾病危险人群:<2.59	M	2015-05-17 12:31:57	部分凝血活酶时间	34.3	S	22-45	M	2015-05-17 11:50:42	*总胆固醇	4.28	mmol/l	3.6-5.17	M	2015-05-17 12:31:57	D二聚体	639	ng/ml	0-115	H	2015-05-17 11:37:39	*葡萄糖	5.85	mmol/l	3.89-6.11	M	2015-05-17 12:31:57	C反应蛋白	4.64	mg/l	0-8	M	2015-05-17 12:31:57	凝血酶原时间(PT)	12.2	S	43023	M	2015-05-17 11:49:22
600	1000199971001	凝血酶原国际比值	0.96		0.7-1.3	M	2014-08-23 10:43:01	低密度脂蛋白	3.17	mmol/l	健康人群:1.8-3.36;心脑血管疾病危险人群:<2.59	M	2014-08-23 09:13:57	部分凝血活酶时间	22	S	22-45	M	2014-08-23 10:43:01	*总胆固醇	5.73	mmol/l	3.6-5.17	H	2014-08-23 09:13:57	D二聚体	110	ng/ml	0-115	M	2014-08-23 10:43:01	*葡萄糖	4.85	mmol/l	3.89-6.11	M	2014-08-23 09:13:57	C反应蛋白	3.34	mg/l	0-8	M	2014-08-30 09:02:12	凝血酶原时间(PT)	11	S	42992	M	2014-08-23 10:43:01
601	1000199971002	凝血酶原国际比值	1.03		0.7-1.3	M	2016-12-13 09:39:45	低密度脂蛋白	2.59	mmol/l	健康人群:1.8-3.36;心脑血管疾病危险人群:<2.59	M	2016-12-13 10:41:30	部分凝血活酶时间	29.7	S	20-40	M	2016-12-13 09:39:45	*总胆固醇	4.98	mmol/l	3.6-5.17	M	2016-12-13 10:41:30	D二聚体	40	ng/ml	0-115	M	2016-12-13 09:39:45	*葡萄糖	4.64	mmol/l	3.89-6.11	M	2016-12-13 10:41:30	C反应蛋白	115.5	mg/l	0-8	H	2016-12-15 13:46:22	凝血酶原时间(PT)	11.9	S	42992	M	2016-12-13 09:39:45
602	1000199977002	凝血酶原国际比值	1.04		0.7-1.3	M	2017-03-15 10:13:04	低密度脂蛋白	1	mmol/l	健康人群:1.8-3.36;心脑血管疾病危险人群:<2.59	M	2017-03-15 09:14:28	部分凝血活酶时间	22.2	S	20-40	M	2017-03-15 10:13:04	*总胆固醇	2.65	mmol/l	3.6-5.17	L	2017-03-15 09:14:28	D二聚体	80	ng/ml	0-115	M	2017-03-15 10:13:04	*葡萄糖	5.13	mmol/l	3.89-6.11	M	2017-03-15 09:14:28	C反应蛋白	10.82	mg/l	0-8	H	2017-03-15 09:14:28	凝血酶原时间(PT)	12	S	42992	M	2017-03-15 10:13:04
603	1000200051004	凝血酶原国际比值	0.92		0.7-1.3	M	2017-02-21 11:55:14	低密度脂蛋白	2.05	mmol/l	健康人群:1.8-3.36;心脑血管疾病危险人群:<2.59	M	2017-02-21 10:53:33	部分凝血活酶时间	24.9	S	20-40	M	2017-02-21 11:55:14	*总胆固醇	4.23	mmol/l	3.6-5.17	M	2017-02-21 10:53:33	D二聚体	390	ng/ml	0-115	H	2017-02-21 11:55:14	*葡萄糖	2.87	mmol/l	3.89-6.11	L	2017-02-21 10:53:33	C反应蛋白	3.9	mg/l	0-8	M	2017-02-20 20:16:55	凝血酶原时间(PT)	10.6	S	42992	M	2017-02-21 11:55:14
604	1000200340002	凝血酶原国际比值	1.02		0.7-1.3	M	2015-12-29 11:07:40	低密度脂蛋白	3.14	mmol/l	健康人群:1.8-3.36;心脑血管疾病危险人群:<2.59	M	2015-12-29 10:36:28	部分凝血活酶时间	24.5	S	22-45	M	2015-12-29 11:07:40	*总胆固醇	5.71	mmol/l	3.6-5.17	H	2015-12-29 10:36:28	D二聚体	50	ng/ml	0-115	M	2015-12-29 11:07:40	*葡萄糖	10.09	mmol/l	3.89-6.11	H	2015-12-29 10:36:28	C反应蛋白	1.04	mg/l	0-8	M	2015-12-29 10:36:28	凝血酶原时间(PT)	11.7	S	42992	M	2015-12-29 11:07:40
605	1000200388003	凝血酶原国际比值	1.09		0.7-1.3	M	2015-03-03 10:12:54	低密度脂蛋白	2.6	mmol/l	健康人群:1.8-3.36;心脑血管疾病危险人群:<2.59	M	2015-03-03 10:12:02	部分凝血活酶时间	43.1	S	22-45	M	2015-03-03 10:12:54	*总胆固醇	4.15	mmol/l	3.6-5.17	M	2015-03-03 10:12:02	D二聚体	2800	ng/ml	0-115	H	2015-03-03 10:12:54	*葡萄糖	5.25	mmol/l	3.89-6.11	M	2015-03-03 10:12:02	C反应蛋白	108.59	mg/l	0-8	H	2015-03-03 10:12:02	凝血酶原时间(PT)	12.6	S	42992	M	2015-03-03 10:12:54
606	1000200641002	凝血酶原国际比值	0.99		0.7-1.3	M	2016-01-05 10:16:04	低密度脂蛋白	3.07	mmol/l	健康人群:1.8-3.36;心脑血管疾病危险人群:<2.59	M	2016-01-05 09:53:54	部分凝血活酶时间	34.8	S	22-45	M	2016-01-05 10:16:04	*总胆固醇	4.98	mmol/l	3.6-5.17	M	2016-01-05 09:53:54	D二聚体	100	ng/ml	0-115	M	2016-01-05 10:16:04	*葡萄糖	4.9	mmol/l	3.89-6.11	M	2016-01-05 09:53:54	C反应蛋白	3.13	mg/l	0-8	M	2016-01-05 09:53:54	凝血酶原时间(PT)	11.4	S	42992	M	2016-01-05 10:16:04
607	1000200786003	凝血酶原国际比值	0.91		0.7-1.3	M	2016-02-25 13:13:32	低密度脂蛋白	3.2	mmol/l	健康人群:1.8-3.36;心脑血管疾病危险人群:<2.59	M	2016-02-25 13:07:39	部分凝血活酶时间	31.9	S	22-45	M	2016-02-25 13:05:30	*总胆固醇	6.5	mmol/l	3.6-5.17	H	2016-02-25 13:07:39	D二聚体	73	ng/ml	0-115	M	2016-02-25 12:57:07	*葡萄糖	5.3	mmol/l	3.89-6.11	M	2016-02-25 13:07:39	C反应蛋白	1.8	mg/l	0-8	M	2016-02-25 13:07:39	凝血酶原时间(PT)	12.3	S	43023	M	2016-02-25 13:13:32
608	1000200920004	凝血酶原国际比值	1.3		0.7-1.3	M	2016-04-26 10:29:48	低密度脂蛋白	2.04	mmol/l	健康人群:1.8-3.36;心脑血管疾病危险人群:<2.59	M	2016-04-26 09:52:47	部分凝血活酶时间	43.1	S	22-45	M	2016-04-26 10:29:48	*总胆固醇	3.3	mmol/l	3.6-5.17	L	2016-04-26 09:52:47	D二聚体	320	ng/ml	0-115	H	2016-04-26 10:29:48	*葡萄糖	5.01	mmol/l	3.89-6.11	M	2016-04-26 09:52:47	C反应蛋白	19.34	mg/l	0-8	H	2016-04-26 10:51:57	凝血酶原时间(PT)	14.9	S	42992	H	2016-04-26 10:29:48
609	1000200995002	凝血酶原国际比值	0.93		0.7-1.3	M	2014-12-24 10:41:51	低密度脂蛋白	1.9	mmol/l	健康人群:1.8-3.36;心脑血管疾病危险人群:<2.59	M	2014-12-24 09:47:38	部分凝血活酶时间	34.4	S	22-45	M	2014-12-24 10:37:59	*总胆固醇	6.64	mmol/l	3.6-5.17	H	2014-12-24 09:47:38	D二聚体	35	ng/ml	0-115	M	2014-12-24 10:08:54	*葡萄糖	5.9	mmol/l	3.89-6.11	M	2014-12-24 09:47:38	C反应蛋白	1.11	mg/l	0-8	M	2014-12-24 09:47:38	凝血酶原时间(PT)	12.2	S	43023	M	2014-12-24 10:41:51
610	1000201054002	凝血酶原国际比值	0.9		0.7-1.3	M	2015-03-28 09:49:40	低密度脂蛋白	3.07	mmol/l	健康人群:1.8-3.36;心脑血管疾病危险人群:<2.59	M	2015-03-28 10:00:38	部分凝血活酶时间	25.3	S	22-45	M	2015-03-28 09:49:40	*总胆固醇	5.13	mmol/l	3.6-5.17	M	2015-03-28 10:00:38	D二聚体	70	ng/ml	0-115	M	2015-03-28 09:49:40	*葡萄糖	5.44	mmol/l	3.89-6.11	M	2015-03-28 10:00:38	C反应蛋白	3.12	mg/l	0-8	M	2015-03-28 10:29:44	凝血酶原时间(PT)	10.3	S	42992	M	2015-03-28 09:49:40
611	1000201054003	凝血酶原国际比值	0.95		0.7-1.3	M	2015-05-13 10:56:18	低密度脂蛋白	2.91	mmol/l	健康人群:1.8-3.36;心脑血管疾病危险人群:<2.59	M	2015-05-13 10:13:41	部分凝血活酶时间	25.2	S	22-45	M	2015-05-13 10:56:18	*总胆固醇	5.26	mmol/l	3.6-5.17	H	2015-05-13 10:13:41	D二聚体	20	ng/ml	0-115	M	2015-05-13 10:56:18	*葡萄糖	5.83	mmol/l	3.89-6.11	M	2015-05-13 10:13:41	C反应蛋白	1.07	mg/l	0-8	M	2015-05-13 11:21:57	凝血酶原时间(PT)	10.9	S	42992	M	2015-05-13 10:56:18
612	1000201120002	凝血酶原国际比值	1.01		0.7-1.3	M	2014-09-13 11:20:30	低密度脂蛋白	1.61	mmol/l	健康人群:1.8-3.36;心脑血管疾病危险人群:<2.59	M	2014-09-13 09:42:19	部分凝血活酶时间	20.8	S	22-45	L	2014-09-13 11:20:30	*总胆固醇	3.49	mmol/l	3.6-5.17	L	2014-09-13 09:42:19	D二聚体	20	ng/ml	0-115	M	2014-09-13 11:20:30	*葡萄糖	4.17	mmol/l	3.89-6.11	M	2014-09-13 09:42:19	C反应蛋白	1.73	mg/l	0-8	M	2014-09-13 09:42:19	凝血酶原时间(PT)	11.6	S	42992	M	2014-09-13 11:20:30
613	1000201329002	凝血酶原国际比值	0.98		0.7-1.3	M	2016-07-12 09:39:08	低密度脂蛋白	2.65	mmol/l	健康人群:1.8-3.36;心脑血管疾病危险人群:<2.59	M	2016-07-12 09:23:16	部分凝血活酶时间	26.5	S	20-40	M	2016-07-12 09:39:08	*总胆固醇	4.51	mmol/l	3.6-5.17	M	2016-07-12 09:23:16	D二聚体	370	ng/ml	0-115	H	2016-07-12 09:39:08	*葡萄糖	4.85	mmol/l	3.89-6.11	M	2016-07-12 09:23:16	C反应蛋白	29.92	mg/l	0-8	H	2016-07-12 09:23:16	凝血酶原时间(PT)	11.3	S	42992	M	2016-07-12 09:39:08
614	1000201329003	凝血酶原国际比值	1.12		0.7-1.3	M	2017-04-06 12:19:38	低密度脂蛋白	3.75	mmol/l	健康人群:1.8-3.36;心脑血管疾病危险人群:<2.59	M	2017-04-06 12:15:13	部分凝血活酶时间	31.8	S	25-45	M	2017-04-06 12:09:44	*总胆固醇	6.32	mmol/l	3.6-5.17	H	2017-04-06 12:15:13	D二聚体	65	ng/ml	0-115	M	2017-04-06 11:51:37	*葡萄糖	6.43	mmol/l	3.89-6.11	H	2017-04-06 12:15:13	C反应蛋白	1.96	mg/l	0-8	M	2017-04-06 12:15:13	凝血酶原时间(PT)	13.9	S	43023	M	2017-04-06 12:19:38
615	1000201490004	凝血酶原国际比值	0.94		0.7-1.3	M	2015-03-02 08:52:51	低密度脂蛋白	2.12	mmol/l	健康人群:1.8-3.36;心脑血管疾病危险人群:<2.59	M	2015-03-02 09:43:08	部分凝血活酶时间	35.2	S	22-45	M	2015-03-02 08:52:51	*总胆固醇	3.8	mmol/l	3.6-5.17	M	2015-03-02 09:43:08	D二聚体	860	ng/ml	0-115	H	2015-03-02 08:52:51	*葡萄糖	5.03	mmol/l	3.89-6.11	M	2015-03-02 09:43:08	C反应蛋白	76.53	mg/l	0-8	H	2015-03-05 09:17:45	凝血酶原时间(PT)	10.8	S	42992	M	2015-03-02 08:52:51
616	1000201490005	凝血酶原国际比值	0.86		0.7-1.3	M	2015-05-08 11:31:29	低密度脂蛋白	2.13	mmol/l	健康人群:1.8-3.36;心脑血管疾病危险人群:<2.59	M	2015-05-08 10:55:52	部分凝血活酶时间	28.2	S	22-45	M	2015-05-08 11:31:29	*总胆固醇	3.96	mmol/l	3.6-5.17	M	2015-05-08 10:55:52	D二聚体	310	ng/ml	0-115	H	2015-05-08 11:43:09	*葡萄糖	5.28	mmol/l	3.89-6.11	M	2015-05-08 10:55:52	C反应蛋白	0.66	mg/l	0-8	M	2015-05-08 10:48:52	凝血酶原时间(PT)	9.9	S	42992	M	2015-05-08 11:31:29
617	1000201523002	凝血酶原国际比值	0.86		0.7-1.3	M	2016-05-12 11:23:24	低密度脂蛋白	3.39	mmol/l	健康人群:1.8-3.36;心脑血管疾病危险人群:<2.59	M	2016-05-12 10:40:59	部分凝血活酶时间	23.7	S	22-45	M	2016-05-12 11:38:15	*总胆固醇	6.04	mmol/l	3.6-5.17	H	2016-05-12 10:41:00	D二聚体	60	ng/ml	0-115	M	2016-05-12 11:23:24	*葡萄糖	5.42	mmol/l	3.89-6.11	M	2016-05-12 10:40:59	C反应蛋白	0.78	mg/l	0-8	M	2016-05-12 10:40:59	凝血酶原时间(PT)	9.9	S	42992	M	2016-05-12 11:23:24
618	1000201534002	凝血酶原国际比值	1.34		0.7-1.3	H	2014-08-26 14:20:58	低密度脂蛋白	2.1	mmol/l	健康人群:1.8-3.36;心脑血管疾病危险人群:<2.59	M	2014-08-25 13:55:14	部分凝血活酶时间	45	S	22-45	M	2014-08-26 14:20:58	*总胆固醇	3.9	mmol/l	3.6-5.17	M	2014-08-25 13:55:14	D二聚体	310	ng/ml	0-115	H	2014-08-26 14:20:58	*葡萄糖	6.8	mmol/l	3.89-6.11	H	2014-08-25 13:55:14	C反应蛋白	7.4	mg/l	0-8	M	2014-08-25 13:55:14	凝血酶原时间(PT)	15.5	S	42992	H	2014-08-26 14:20:58
619	1000201705002	凝血酶原国际比值	0.86		0.7-1.3	M	2017-03-07 13:00:18	低密度脂蛋白	4.31	mmol/l	健康人群:1.8-3.36;心脑血管疾病危险人群:<2.59	M	2017-03-07 12:34:51	部分凝血活酶时间	20.7	S	20-40	M	2017-03-07 13:00:18	*总胆固醇	7.22	mmol/l	3.6-5.17	H	2017-03-07 12:34:51	D二聚体	40	ng/ml	0-115	M	2017-03-07 13:00:18	*葡萄糖	6.47	mmol/l	3.89-6.11	H	2017-03-07 12:34:51	C反应蛋白	1.06	mg/l	0-8	M	2017-03-07 12:34:51	凝血酶原时间(PT)	9.9	S	42992	M	2017-03-07 13:00:18
620	1000201756002	凝血酶原国际比值	1.02		0.7-1.3	M	2016-01-14 09:47:44	低密度脂蛋白	1.25	mmol/l	健康人群:1.8-3.36;心脑血管疾病危险人群:<2.59	M	2016-01-14 10:06:30	部分凝血活酶时间	24.2	S	22-45	M	2016-01-14 09:45:33	*总胆固醇	3.02	mmol/l	3.6-5.17	L	2016-01-14 10:06:30	D二聚体	586	ng/ml	0-115	H	2016-01-14 10:34:08	*葡萄糖	5.43	mmol/l	3.89-6.11	M	2016-01-14 10:06:30	C反应蛋白	1.25	mg/l	0-8	M	2016-01-15 11:41:42	凝血酶原时间(PT)	13.3	S	43023	M	2016-01-14 09:47:44
621	1000201785001	凝血酶原国际比值	0.99		0.7-1.3	M	2014-09-02 13:29:33	低密度脂蛋白	3.77	mmol/l	健康人群:1.8-3.36;心脑血管疾病危险人群:<2.59	M	2014-09-02 13:10:43	部分凝血活酶时间	27.3	S	22-45	M	2014-09-02 13:29:33	*总胆固醇	6.5	mmol/l	3.6-5.17	H	2014-09-02 13:10:43	D二聚体	80	ng/ml	0-115	M	2014-09-02 13:29:33	*葡萄糖	6.3	mmol/l	3.89-6.11	H	2014-09-02 13:10:43	C反应蛋白	3.11	mg/l	0-8	M	2014-08-21 09:06:01	凝血酶原时间(PT)	11.4	S	42992	M	2014-09-02 13:29:33
622	1000201832002	凝血酶原国际比值	1.06		0.7-1.3	M	2015-06-30 14:04:52	低密度脂蛋白	1.4	mmol/l	健康人群:1.8-3.36;心脑血管疾病危险人群:<2.59	M	2015-06-30 14:13:16	部分凝血活酶时间	28.6	S	22-45	M	2015-06-30 14:04:52	*总胆固醇	3.6	mmol/l	3.6-5.17	M	2015-06-30 14:13:16	D二聚体	180	ng/ml	0-115	H	2015-06-30 14:04:52	*葡萄糖	4.5	mmol/l	3.89-6.11	M	2015-06-30 14:13:16	C反应蛋白	4.1	mg/l	0-8	M	2015-06-30 14:13:16	凝血酶原时间(PT)	12.2	S	42992	M	2015-06-30 14:04:52
623	1000201851002	凝血酶原国际比值	1		0.7-1.3	M	2014-10-14 14:39:54	低密度脂蛋白	2.8	mmol/l	健康人群:1.8-3.36;心脑血管疾病危险人群:<2.59	M	2014-10-14 14:27:36	部分凝血活酶时间	35.9	S	22-45	M	2014-10-14 14:17:13	*总胆固醇	4.9	mmol/l	3.6-5.17	M	2014-10-14 14:27:36	D二聚体	148	ng/ml	0-115	H	2014-10-14 14:30:20	*葡萄糖	4.6	mmol/l	3.89-6.11	M	2014-10-14 14:27:36	C反应蛋白	0.2	mg/l	0-8	M	2014-10-14 14:24:50	凝血酶原时间(PT)	13.1	S	43023	M	2014-10-14 14:39:54
624	1000201868003	凝血酶原国际比值	0.93		0.7-1.3	M	2015-04-15 10:13:36	低密度脂蛋白	1.15	mmol/l	健康人群:1.8-3.36;心脑血管疾病危险人群:<2.59	M	2015-04-15 10:50:52	部分凝血活酶时间	33.3	S	22-45	M	2015-04-15 10:06:43	*总胆固醇	2.49	mmol/l	3.6-5.17	L	2015-04-15 10:50:52	D二聚体	944	ng/ml	0-115	H	2015-04-15 09:06:39	*葡萄糖	5.26	mmol/l	3.89-6.11	M	2015-04-15 10:50:52	C反应蛋白	32.55	mg/l	0-8	H	2015-04-15 10:50:52	凝血酶原时间(PT)	12.2	S	43023	M	2015-04-15 10:13:36
625	1000201871002	凝血酶原国际比值	0.83		0.7-1.3	M	2016-05-30 11:16:11	低密度脂蛋白	3.25	mmol/l	健康人群:1.8-3.36;心脑血管疾病危险人群:<2.59	M	2016-05-30 10:51:52	部分凝血活酶时间	23.5	S	22-45	M	2016-05-30 11:16:11	*总胆固醇	6.02	mmol/l	3.6-5.17	H	2016-05-30 10:51:52	D二聚体	40	ng/ml	0-115	M	2016-05-30 11:16:11	*葡萄糖	4.86	mmol/l	3.89-6.11	M	2016-05-30 10:51:52	C反应蛋白	0.88	mg/l	0-8	M	2016-05-30 11:16:06	凝血酶原时间(PT)	9.6	S	42992	M	2016-05-30 11:16:11
626	1000201900002	凝血酶原国际比值	1.06		0.7-1.3	M	2014-09-02 10:40:11	低密度脂蛋白	3.61	mmol/l	健康人群:1.8-3.36;心脑血管疾病危险人群:<2.59	M	2014-09-02 09:51:11	部分凝血活酶时间	28	S	22-45	M	2014-09-02 10:40:11	*总胆固醇	6.12	mmol/l	3.6-5.17	H	2014-09-02 09:51:11	D二聚体	160	ng/ml	0-115	H	2014-09-02 11:11:02	*葡萄糖	4.47	mmol/l	3.89-6.11	M	2014-09-02 09:51:11	C反应蛋白	4.81	mg/l	0-8	M	2014-09-02 09:51:11	凝血酶原时间(PT)	12.2	S	42992	M	2014-09-02 10:40:11
627	1000202159002	凝血酶原国际比值	0.85		0.7-1.3	M	2015-05-26 11:56:53	低密度脂蛋白	2.51	mmol/l	健康人群:1.8-3.36;心脑血管疾病危险人群:<2.59	M	2015-05-26 11:56:38	部分凝血活酶时间	27.9	S	22-45	M	2015-05-26 11:56:53	*总胆固醇	4.75	mmol/l	3.6-5.17	M	2015-05-26 11:56:38	D二聚体	30	ng/ml	0-115	M	2015-05-26 11:56:53	*葡萄糖	5.08	mmol/l	3.89-6.11	M	2015-05-26 11:56:38	C反应蛋白	1.61	mg/l	0-8	M	2015-05-26 12:00:58	凝血酶原时间(PT)	9.8	S	42992	M	2015-05-26 11:56:53
628	1000202198002	凝血酶原国际比值	0.87		0.7-1.3	M	2015-08-25 10:02:02	低密度脂蛋白	2.52	mmol/l	健康人群:1.8-3.36;心脑血管疾病危险人群:<2.59	M	2015-08-25 09:02:04	部分凝血活酶时间	30.4	S	22-45	M	2015-08-25 10:02:02	*总胆固醇	4.86	mmol/l	3.6-5.17	M	2015-08-25 09:02:04	D二聚体	20	ng/ml	0-115	M	2015-08-25 10:02:02	*葡萄糖	4.88	mmol/l	3.89-6.11	M	2015-08-25 09:02:04	C反应蛋白	0.61	mg/l	0-8	M	2015-08-25 09:02:04	凝血酶原时间(PT)	10	S	42992	M	2015-08-25 10:02:02
629	1000202198003	凝血酶原国际比值	0.93		0.7-1.3	M	2016-08-24 11:00:52	低密度脂蛋白	2.66	mmol/l	健康人群:1.8-3.36;心脑血管疾病危险人群:<2.59	M	2016-08-24 08:59:45	部分凝血活酶时间	29.8	S	20-40	M	2016-08-24 10:50:35	*总胆固醇	4.88	mmol/l	3.6-5.17	M	2016-08-24 08:59:45	D二聚体	269	ng/ml	0-115	H	2016-08-24 10:39:22	*葡萄糖	5.05	mmol/l	3.89-6.11	M	2016-08-24 08:59:45	C反应蛋白	18.07	mg/l	0-8	H	2016-08-24 08:59:45	凝血酶原时间(PT)	11.6	S	43023	M	2016-08-24 11:00:52
630	1000202326002	凝血酶原国际比值	1.05		0.7-1.3	M	2017-03-08 11:37:05	低密度脂蛋白	3.05	mmol/l	健康人群:1.8-3.36;心脑血管疾病危险人群:<2.59	M	2017-03-08 11:55:19	部分凝血活酶时间	44	S	25-45	M	2017-03-08 11:20:34	*总胆固醇	5.32	mmol/l	3.6-5.17	H	2017-03-08 11:55:19	D二聚体	212	ng/ml	0-115	H	2017-03-08 11:31:07	*葡萄糖	5.09	mmol/l	3.89-6.11	M	2017-03-08 11:55:19	C反应蛋白	1.98	mg/l	0-8	M	2017-03-08 11:55:19	凝血酶原时间(PT)	13	S	43023	M	2017-03-08 11:37:05
631	1000202349002	凝血酶原国际比值	0.94		0.7-1.3	M	2014-11-18 09:45:50	低密度脂蛋白	3.32	mmol/l	健康人群:1.8-3.36;心脑血管疾病危险人群:<2.59	M	2014-11-18 09:22:48	部分凝血活酶时间	22.9	S	22-45	M	2014-11-18 10:25:30	*总胆固醇	5.94	mmol/l	3.6-5.17	H	2014-11-18 09:22:48	D二聚体	1900	ng/ml	0-115	H	2014-11-18 09:45:50	*葡萄糖	4.78	mmol/l	3.89-6.11	M	2014-11-18 09:22:48	C反应蛋白	1.31	mg/l	0-8	M	2014-11-18 09:22:48	凝血酶原时间(PT)	10.8	S	42992	M	2014-11-18 09:45:50
632	1000202439002	凝血酶原国际比值	0.92		0.7-1.3	M	2014-09-22 10:49:47	低密度脂蛋白	3.01	mmol/l	健康人群:1.8-3.36;心脑血管疾病危险人群:<2.59	M	2014-09-22 10:48:17	部分凝血活酶时间	34.4	S	22-45	M	2014-09-22 10:43:31	*总胆固醇	5.3	mmol/l	3.6-5.17	H	2014-09-22 10:48:17	D二聚体	422	ng/ml	0-115	H	2014-09-22 10:48:26	*葡萄糖	5.26	mmol/l	3.89-6.11	M	2014-09-22 10:48:17	C反应蛋白	2.82	mg/l	0-8	M	2014-09-22 10:48:17	凝血酶原时间(PT)	12.2	S	43023	M	2014-09-22 10:49:47
633	1000202452002	凝血酶原国际比值	0.91		0.7-1.3	M	2015-12-23 09:46:56	低密度脂蛋白	2.83	mmol/l	健康人群:1.8-3.36;心脑血管疾病危险人群:<2.59	M	2015-12-23 10:11:07	部分凝血活酶时间	30.6	S	22-45	M	2015-12-23 09:46:56	*总胆固醇	5.25	mmol/l	3.6-5.17	H	2015-12-23 10:11:07	D二聚体	420	ng/ml	0-115	H	2015-12-23 09:46:56	*葡萄糖	5.17	mmol/l	3.89-6.11	M	2015-12-23 10:11:07	C反应蛋白	9.95	mg/l	0-8	H	2015-12-23 10:11:07	凝血酶原时间(PT)	10.5	S	42992	M	2015-12-23 09:46:56
634	1000202515002	凝血酶原国际比值	0.86		0.7-1.3	M	2015-07-23 11:25:34	低密度脂蛋白	3.48	mmol/l	健康人群:1.8-3.36;心脑血管疾病危险人群:<2.59	M	2015-07-23 09:40:57	部分凝血活酶时间	35.5	S	22-45	M	2015-07-23 11:18:22	*总胆固醇	6.07	mmol/l	3.6-5.17	H	2015-07-23 09:40:57	D二聚体	35	ng/ml	0-115	M	2015-07-23 10:29:22	*葡萄糖	5.17	mmol/l	3.89-6.11	M	2015-07-23 09:40:57	C反应蛋白	8.74	mg/l	0-8	H	2015-07-23 09:40:57	凝血酶原时间(PT)	11.3	S	43023	M	2015-07-23 11:25:34
635	1000202559003	凝血酶原国际比值	0.99		0.7-1.3	M	2015-01-03 11:23:58	低密度脂蛋白	3.62	mmol/l	健康人群:1.8-3.36;心脑血管疾病危险人群:<2.59	M	2015-01-03 11:37:17	部分凝血活酶时间	32.9	S	22-45	M	2015-01-03 11:23:58	*总胆固醇	5.58	mmol/l	3.6-5.17	H	2015-01-03 11:37:17	D二聚体	60	ng/ml	0-115	M	2015-01-03 11:23:58	*葡萄糖	6.11	mmol/l	3.89-6.11	M	2015-01-03 12:03:04	C反应蛋白	4.12	mg/l	0-8	M	2015-01-03 11:37:17	凝血酶原时间(PT)	11.4	S	42992	M	2015-01-03 11:23:58
636	1000202647002	凝血酶原国际比值	1.15		0.7-1.3	M	2014-08-27 09:37:10	低密度脂蛋白	3.11	mmol/l	健康人群:1.8-3.36;心脑血管疾病危险人群:<2.59	M	2014-08-27 09:34:06	部分凝血活酶时间	47.2	S	22-45	H	2014-08-27 10:13:34	*总胆固醇	5.42	mmol/l	3.6-5.17	H	2014-08-27 09:34:06	D二聚体	4750	ng/ml	0-115	H	2014-08-27 09:37:10	*葡萄糖	7.32	mmol/l	3.89-6.11	H	2014-08-27 09:34:06	C反应蛋白	89.94	mg/l	0-8	H	2014-08-27 09:32:56	凝血酶原时间(PT)	13.3	S	42992	M	2014-08-27 09:37:10
637	1000202825002	凝血酶原国际比值	0.96		0.7-1.3	M	2016-07-07 11:05:31	低密度脂蛋白	1.44	mmol/l	健康人群:1.8-3.36;心脑血管疾病危险人群:<2.59	M	2016-07-07 10:23:02	部分凝血活酶时间	28.2	S	20-40	M	2016-07-07 11:05:31	*总胆固醇	3.68	mmol/l	3.6-5.17	M	2016-07-07 10:23:02	D二聚体	600	ng/ml	0-115	H	2016-07-07 11:05:31	*葡萄糖	4.48	mmol/l	3.89-6.11	M	2016-07-07 10:23:02	C反应蛋白	0.09	mg/l	0-8	M	2016-07-07 10:23:02	凝血酶原时间(PT)	11.1	S	42992	M	2016-07-07 11:05:31
638	1000202888002	凝血酶原国际比值	1.08		0.7-1.3	M	2014-09-11 10:59:04	低密度脂蛋白	3.55	mmol/l	健康人群:1.8-3.36;心脑血管疾病危险人群:<2.59	M	2014-09-11 09:58:11	部分凝血活酶时间	24.9	S	22-45	M	2014-09-11 10:59:04	*总胆固醇	6.79	mmol/l	3.6-5.17	H	2014-09-11 09:58:11	D二聚体	530	ng/ml	0-115	H	2014-09-11 10:59:04	*葡萄糖	4.56	mmol/l	3.89-6.11	M	2014-09-11 09:58:11	C反应蛋白	4.72	mg/l	0-8	M	2014-09-11 09:58:11	凝血酶原时间(PT)	12.4	S	42992	M	2014-09-11 10:59:04
639	1000202888003	凝血酶原国际比值	1.05		0.7-1.3	M	2016-04-26 10:01:10	低密度脂蛋白	2.83	mmol/l	健康人群:1.8-3.36;心脑血管疾病危险人群:<2.59	M	2016-04-26 10:36:41	部分凝血活酶时间	23.3	S	22-45	M	2016-04-26 10:01:10	*总胆固醇	5.75	mmol/l	3.6-5.17	H	2016-04-26 10:36:41	D二聚体	130	ng/ml	0-115	H	2016-04-26 10:01:10	*葡萄糖	4.24	mmol/l	3.89-6.11	M	2016-04-26 10:36:41	C反应蛋白	0.76	mg/l	0-8	M	2016-04-28 11:30:17	凝血酶原时间(PT)	12.1	S	42992	M	2016-04-26 10:01:10
640	1000203022002	凝血酶原国际比值	0.86		0.7-1.3	M	2015-04-01 09:55:12	低密度脂蛋白	6.25	mmol/l	健康人群:1.8-3.36;心脑血管疾病危险人群:<2.59	M	2015-04-01 10:24:22	部分凝血活酶时间	29.4	S	22-45	M	2015-04-01 09:53:06	*总胆固醇	8.59	mmol/l	3.6-5.17	H	2015-04-01 10:24:22	D二聚体	588	ng/ml	0-115	H	2015-04-01 09:46:18	*葡萄糖	4.04	mmol/l	3.89-6.11	M	2015-04-01 10:24:22	C反应蛋白	6.55	mg/l	0-8	M	2015-04-01 10:24:22	凝血酶原时间(PT)	11.3	S	43023	M	2015-04-01 09:55:12
641	1000203050005	凝血酶原国际比值	0.91		0.7-1.3	M	2015-03-28 11:42:28	低密度脂蛋白	2.44	mmol/l	健康人群:1.8-3.36;心脑血管疾病危险人群:<2.59	M	2015-03-28 11:38:35	部分凝血活酶时间	31.3	S	22-45	M	2015-03-28 11:42:28	*总胆固醇	5.3	mmol/l	3.6-5.17	H	2015-03-28 11:38:35	D二聚体	210	ng/ml	0-115	H	2015-03-28 11:42:28	*葡萄糖	8.32	mmol/l	3.89-6.11	H	2015-03-28 11:38:35	C反应蛋白	27.85	mg/l	0-8	H	2015-03-28 11:38:35	凝血酶原时间(PT)	10.4	S	42992	M	2015-03-28 11:42:28
642	1000203415002	凝血酶原国际比值	1.28		0.7-1.3	M	2014-09-16 13:56:21	低密度脂蛋白	3.92	mmol/l	健康人群:1.8-3.36;心脑血管疾病危险人群:<2.59	M	2014-09-16 13:35:59	部分凝血活酶时间	21	S	22-45	L	2014-09-16 13:56:21	*总胆固醇	6.2	mmol/l	3.6-5.17	H	2014-09-16 13:35:59	D二聚体	370	ng/ml	0-115	H	2014-09-16 13:56:21	*葡萄糖	5.8	mmol/l	3.89-6.11	M	2014-09-16 13:35:59	C反应蛋白	9.7	mg/l	0-8	H	2014-09-16 13:35:59	凝血酶原时间(PT)	14.8	S	42992	H	2014-09-16 13:56:21
643	1000203518001	凝血酶原国际比值	1.01		0.7-1.3	M	2014-10-09 09:19:37	低密度脂蛋白	2.21	mmol/l	健康人群:1.8-3.36;心脑血管疾病危险人群:<2.59	M	2014-10-09 09:35:10	部分凝血活酶时间	22.6	S	22-45	M	2014-10-09 11:19:04	*总胆固醇	3.73	mmol/l	3.6-5.17	M	2014-10-09 09:35:10	D二聚体	2580	ng/ml	0-115	H	2014-10-09 09:19:37	*葡萄糖	3.98	mmol/l	3.89-6.11	M	2014-10-09 09:35:10	C反应蛋白	43.2	mg/l	0-8	H	2014-11-02 10:19:49	凝血酶原时间(PT)	11.6	S	42992	M	2014-10-09 09:19:37
644	1000203916002	凝血酶原国际比值	0.97		0.7-1.3	M	2015-07-20 13:22:53	低密度脂蛋白	2.25	mmol/l	健康人群:1.8-3.36;心脑血管疾病危险人群:<2.59	M	2015-07-20 13:14:56	部分凝血活酶时间	24.5	S	22-45	M	2015-07-20 13:22:53	*总胆固醇	4.9	mmol/l	3.6-5.17	M	2015-07-20 13:14:56	D二聚体	10	ng/ml	0-115	M	2015-07-20 13:22:53	*葡萄糖	4.7	mmol/l	3.89-6.11	M	2015-07-20 13:14:56	C反应蛋白	0.3	mg/l	0-8	M	2015-07-20 13:14:56	凝血酶原时间(PT)	11.2	S	42992	M	2015-07-20 13:22:53
645	1000204038003	凝血酶原国际比值	1.1		0.7-1.3	M	2017-01-10 11:42:02	低密度脂蛋白	2.67	mmol/l	健康人群:1.8-3.36;心脑血管疾病危险人群:<2.59	M	2017-01-10 11:10:38	部分凝血活酶时间	30.8	S	20-40	M	2017-01-10 11:42:02	*总胆固醇	4.56	mmol/l	3.6-5.17	M	2017-01-10 11:10:38	D二聚体	50	ng/ml	0-115	M	2017-01-10 11:42:02	*葡萄糖	4.87	mmol/l	3.89-6.11	M	2017-01-10 11:10:38	C反应蛋白	20.72	mg/l	0-8	H	2017-01-20 09:28:44	凝血酶原时间(PT)	12.6	S	42992	M	2017-01-10 11:42:02
646	1000204098002	凝血酶原国际比值	0.96		0.7-1.3	M	2014-10-22 07:36:51	低密度脂蛋白	3.62	mmol/l	健康人群:1.8-3.36;心脑血管疾病危险人群:<2.59	M	2014-10-22 07:46:03	部分凝血活酶时间	32.5	S	22-45	M	2014-10-22 07:36:21	*总胆固醇	6.2	mmol/l	3.6-5.17	H	2014-10-22 07:46:03	D二聚体	275	ng/ml	0-115	H	2014-10-22 07:37:37	*葡萄糖	5.6	mmol/l	3.89-6.11	M	2014-10-22 07:46:03	C反应蛋白	0.08	mg/l	0-8	M	2014-10-06 08:54:32	凝血酶原时间(PT)	12.6	S	43023	M	2014-10-22 07:36:51
647	1000204204002	凝血酶原国际比值	0.96		0.7-1.3	M	2016-06-29 11:48:26	低密度脂蛋白	3.18	mmol/l	健康人群:1.8-3.36;心脑血管疾病危险人群:<2.59	M	2016-06-29 11:45:02	部分凝血活酶时间	22.7	S	20-40	M	2016-06-29 11:48:26	*总胆固醇	5.81	mmol/l	3.6-5.17	H	2016-06-29 11:45:02	D二聚体	20	ng/ml	0-115	M	2016-06-29 11:48:26	*葡萄糖	6.07	mmol/l	3.89-6.11	M	2016-06-29 11:45:02	C反应蛋白	1.25	mg/l	0-8	M	2016-06-29 11:45:02	凝血酶原时间(PT)	11	S	42992	M	2016-06-29 11:48:26
648	1000204248002	凝血酶原国际比值	0.99		0.7-1.3	M	2016-02-16 14:09:26	低密度脂蛋白	2.8	mmol/l	健康人群:1.8-3.36;心脑血管疾病危险人群:<2.59	M	2016-02-16 15:39:41	部分凝血活酶时间	28.9	S	22-45	M	2016-02-16 14:09:26	*总胆固醇	4.9	mmol/l	3.6-5.17	M	2016-02-16 15:39:41	D二聚体	90	ng/ml	0-115	M	2016-02-16 14:09:26	*葡萄糖	5.1	mmol/l	3.89-6.11	M	2016-02-16 15:39:41	C反应蛋白	1	mg/l	0-8	M	2016-02-16 15:39:41	凝血酶原时间(PT)	11.4	S	42992	M	2016-02-16 14:09:26
649	1000204405002	凝血酶原国际比值	0.96		0.7-1.3	M	2015-08-01 10:13:59	低密度脂蛋白	2.1	mmol/l	健康人群:1.8-3.36;心脑血管疾病危险人群:<2.59	M	2015-08-01 09:28:15	部分凝血活酶时间	26.6	S	22-45	M	2015-08-01 10:13:59	*总胆固醇	3.44	mmol/l	3.6-5.17	L	2015-08-01 09:28:15	D二聚体	900	ng/ml	0-115	H	2015-08-01 10:13:59	*葡萄糖	6.62	mmol/l	3.89-6.11	H	2015-08-01 09:28:15	C反应蛋白	2.95	mg/l	0-8	M	2015-08-01 09:28:15	凝血酶原时间(PT)	11.1	S	42992	M	2015-08-01 10:13:59
650	1000204412003	凝血酶原国际比值	1.02		0.7-1.3	M	2016-05-17 10:51:26	低密度脂蛋白	2.75	mmol/l	健康人群:1.8-3.36;心脑血管疾病危险人群:<2.59	M	2016-05-17 10:09:16	部分凝血活酶时间	23.8	S	22-45	M	2016-05-17 10:51:26	*总胆固醇	4.19	mmol/l	3.6-5.17	M	2016-05-17 10:09:16	D二聚体	490	ng/ml	0-115	H	2016-05-17 10:51:26	*葡萄糖	9.74	mmol/l	3.89-6.11	H	2016-05-17 10:09:16	C反应蛋白	29.28	mg/l	0-8	H	2016-05-17 10:09:11	凝血酶原时间(PT)	11.7	S	42992	M	2016-05-17 10:51:26
651	1000204706002	凝血酶原国际比值	0.98		0.7-1.3	M	2015-07-31 15:18:50	低密度脂蛋白	2.73	mmol/l	健康人群:1.8-3.36;心脑血管疾病危险人群:<2.59	M	2015-07-31 11:16:10	部分凝血活酶时间	40.3	S	22-45	M	2015-07-31 15:19:05	*总胆固醇	4.73	mmol/l	3.6-5.17	M	2015-07-31 11:16:10	D二聚体	240	ng/ml	0-115	H	2015-07-31 15:39:17	*葡萄糖	8.09	mmol/l	3.89-6.11	H	2015-07-31 11:16:10	C反应蛋白	109.12	mg/l	0-8	H	2015-07-31 11:14:54	凝血酶原时间(PT)	12.8	S	43023	M	2015-07-31 15:18:50
652	1000204706004	凝血酶原国际比值	0.99		0.7-1.3	M	2016-11-11 10:59:31	低密度脂蛋白	1.85	mmol/l	健康人群:1.8-3.36;心脑血管疾病危险人群:<2.59	M	2016-11-11 10:56:53	部分凝血活酶时间	29.7	S	20-40	M	2016-11-11 10:59:31	*总胆固醇	3.41	mmol/l	3.6-5.17	L	2016-11-11 10:56:53	D二聚体	3360	ng/ml	0-115	H	2016-11-11 10:59:31	*葡萄糖	6.49	mmol/l	3.89-6.11	H	2016-11-11 10:56:53	C反应蛋白	36.9	mg/l	0-8	H	2016-11-13 09:31:53	凝血酶原时间(PT)	11.4	S	42992	M	2016-11-11 10:59:31
653	1000204713002	凝血酶原国际比值	0.97		0.7-1.3	M	2015-06-28 11:33:53	低密度脂蛋白	3.11	mmol/l	健康人群:1.8-3.36;心脑血管疾病危险人群:<2.59	M	2015-06-28 11:48:00	部分凝血活酶时间	27.2	S	22-45	M	2015-06-28 11:33:53	*总胆固醇	5.7	mmol/l	3.6-5.17	H	2015-06-28 11:48:00	D二聚体	140	ng/ml	0-115	H	2015-06-28 11:33:53	*葡萄糖	5.06	mmol/l	3.89-6.11	M	2015-06-28 11:48:00	C反应蛋白	2.78	mg/l	0-8	M	2015-06-28 11:48:00	凝血酶原时间(PT)	11.2	S	42992	M	2015-06-28 11:33:53
654	1000204926002	凝血酶原国际比值	1.09		0.7-1.3	M	2016-04-11 11:09:58	低密度脂蛋白	2.44	mmol/l	健康人群:1.8-3.36;心脑血管疾病危险人群:<2.59	M	2016-04-11 08:53:03	部分凝血活酶时间	32.2	S	22-45	M	2016-04-11 11:04:52	*总胆固醇	4.63	mmol/l	3.6-5.17	M	2016-04-11 08:53:03	D二聚体	4252	ng/ml	0-115	H	2016-04-11 10:47:56	*葡萄糖	5.64	mmol/l	3.89-6.11	M	2016-04-11 08:53:03	C反应蛋白	6.15	mg/l	0-8	M	2016-04-11 09:07:11	凝血酶原时间(PT)	14.7	S	43023	M	2016-04-11 11:09:58
655	1000204992001	凝血酶原国际比值	1.13		0.7-1.3	M	2014-08-23 11:10:40	低密度脂蛋白	1.04	mmol/l	健康人群:1.8-3.36;心脑血管疾病危险人群:<2.59	M	2014-08-23 09:12:22	部分凝血活酶时间	21.8	S	22-45	L	2014-08-23 11:26:50	*总胆固醇	2.51	mmol/l	3.6-5.17	L	2014-08-23 09:12:22	D二聚体	7980	ng/ml	0-115	H	2014-08-23 11:10:40	*葡萄糖	14.59	mmol/l	3.89-6.11	H	2014-08-23 09:12:22	C反应蛋白	20.8	mg/l	0-8	H	2014-08-23 19:47:33	凝血酶原时间(PT)	13	S	42992	M	2014-08-23 11:10:40
656	1000205012004	凝血酶原国际比值	1.05		0.7-1.3	M	2016-12-16 10:20:36	低密度脂蛋白	2.55	mmol/l	健康人群:1.8-3.36;心脑血管疾病危险人群:<2.59	M	2016-12-16 10:55:02	部分凝血活酶时间	32.7	S	20-40	M	2016-12-16 10:24:16	*总胆固醇	5.03	mmol/l	3.6-5.17	M	2016-12-16 10:55:02	D二聚体	43	ng/ml	0-115	M	2016-12-16 09:36:04	*葡萄糖	4.94	mmol/l	3.89-6.11	M	2016-12-16 10:55:02	C反应蛋白	0.07	mg/l	0-8	M	2016-12-16 10:55:02	凝血酶原时间(PT)	13	S	43023	M	2016-12-16 10:20:36
657	1000205257003	凝血酶原国际比值	0.94		0.7-1.3	M	2015-05-08 11:27:09	低密度脂蛋白	3.1	mmol/l	健康人群:1.8-3.36;心脑血管疾病危险人群:<2.59	M	2015-05-08 09:15:54	部分凝血活酶时间	31.6	S	22-45	M	2015-05-08 11:27:09	*总胆固醇	5.06	mmol/l	3.6-5.17	M	2015-05-08 09:15:54	D二聚体	240	ng/ml	0-115	H	2015-05-08 11:27:09	*葡萄糖	25.93	mmol/l	3.89-6.11	HH	2015-05-08 09:15:54	C反应蛋白	76.79	mg/l	0-8	H	2015-05-08 09:15:55	凝血酶原时间(PT)	10.8	S	42992	M	2015-05-08 11:27:09
658	1000205282001	凝血酶原国际比值	1.01		0.7-1.3	M	2014-08-20 10:33:30	低密度脂蛋白	2.87	mmol/l	健康人群:1.8-3.36;心脑血管疾病危险人群:<2.59	M	2014-08-20 08:49:16	部分凝血活酶时间	26.2	S	22-45	M	2014-08-20 10:33:30	*总胆固醇	4.59	mmol/l	3.6-5.17	M	2014-08-20 08:49:16	D二聚体	2090	ng/ml	0-115	H	2014-08-20 10:33:30	*葡萄糖	5.4	mmol/l	3.89-6.11	M	2014-08-20 08:49:16	C反应蛋白	5.5	mg/l	0-8	M	2014-09-04 07:34:47	凝血酶原时间(PT)	11.6	S	42992	M	2014-08-20 10:33:30
659	1000205361002	凝血酶原国际比值	0.93		0.7-1.3	M	2015-06-15 11:31:30	低密度脂蛋白	3.32	mmol/l	健康人群:1.8-3.36;心脑血管疾病危险人群:<2.59	M	2015-06-15 11:19:55	部分凝血活酶时间	28.7	S	22-45	M	2015-06-15 11:31:30	*总胆固醇	5.41	mmol/l	3.6-5.17	H	2015-06-15 11:19:55	D二聚体	110	ng/ml	0-115	M	2015-06-15 11:31:30	*葡萄糖	5.31	mmol/l	3.89-6.11	M	2015-06-15 11:19:55	C反应蛋白	0.94	mg/l	0-8	M	2015-06-15 11:19:55	凝血酶原时间(PT)	10.7	S	42992	M	2015-06-15 11:31:30
660	1000205392002	凝血酶原国际比值	1.03		0.7-1.3	M	2014-09-19 16:49:32	低密度脂蛋白	2.81	mmol/l	健康人群:1.8-3.36;心脑血管疾病危险人群:<2.59	M	2014-09-19 09:45:28	部分凝血活酶时间	37.5	S	22-45	M	2014-09-19 16:47:31	*总胆固醇	4.8	mmol/l	3.6-5.17	M	2014-09-19 09:45:28	D二聚体	487	ng/ml	0-115	H	2014-09-19 16:50:17	*葡萄糖	3.85	mmol/l	3.89-6.11	L	2014-09-19 09:45:28	C反应蛋白	2.84	mg/l	0-8	M	2014-09-19 10:39:17	凝血酶原时间(PT)	13.4	S	43023	M	2014-09-19 16:49:32
661	1000205563002	凝血酶原国际比值	1.01		0.7-1.3	M	2015-06-09 10:09:04	低密度脂蛋白	2.12	mmol/l	健康人群:1.8-3.36;心脑血管疾病危险人群:<2.59	M	2015-06-09 10:33:10	部分凝血活酶时间	31.5	S	22-45	M	2015-06-09 10:09:04	*总胆固醇	3.98	mmol/l	3.6-5.17	M	2015-06-09 10:33:10	D二聚体	200	ng/ml	0-115	H	2015-06-09 10:09:04	*葡萄糖	4.3	mmol/l	3.89-6.11	M	2015-06-09 10:33:10	C反应蛋白	3.3	mg/l	0-8	M	2015-06-14 10:31:05	凝血酶原时间(PT)	11.6	S	42992	M	2015-06-09 10:09:04
662	1000205769002	凝血酶原国际比值	1.06		0.7-1.3	M	2014-09-09 10:22:38	低密度脂蛋白	3.24	mmol/l	健康人群:1.8-3.36;心脑血管疾病危险人群:<2.59	M	2014-09-09 10:23:22	部分凝血活酶时间	24.6	S	22-45	M	2014-09-09 10:22:38	*总胆固醇	6.4	mmol/l	3.6-5.17	H	2014-09-09 10:23:22	D二聚体	4450	ng/ml	0-115	H	2014-09-09 10:22:38	*葡萄糖	5.45	mmol/l	3.89-6.11	M	2014-09-09 10:23:22	C反应蛋白	74.32	mg/l	0-8	H	2014-09-09 10:23:22	凝血酶原时间(PT)	12.2	S	42992	M	2014-09-09 10:22:38
663	1000205769003	凝血酶原国际比值	0.95		0.7-1.3	M	2015-11-10 10:49:04	低密度脂蛋白	2.4	mmol/l	健康人群:1.8-3.36;心脑血管疾病危险人群:<2.59	M	2015-11-10 10:12:24	部分凝血活酶时间	34	S	22-45	M	2015-11-10 10:38:01	*总胆固醇	4.43	mmol/l	3.6-5.17	M	2015-11-10 10:12:24	D二聚体	623	ng/ml	0-115	H	2015-11-10 10:16:34	*葡萄糖	4.39	mmol/l	3.89-6.11	M	2015-11-10 10:12:24	C反应蛋白	52.33	mg/l	0-8	H	2015-11-10 10:12:24	凝血酶原时间(PT)	12.5	S	43023	M	2015-11-10 10:49:04
664	1000205769005	凝血酶原国际比值	1		0.7-1.3	M	2016-08-04 10:50:15	低密度脂蛋白	3.38	mmol/l	健康人群:1.8-3.36;心脑血管疾病危险人群:<2.59	M	2016-08-04 11:37:27	部分凝血活酶时间	22.7	S	20-40	M	2016-08-04 10:50:15	*总胆固醇	5.89	mmol/l	3.6-5.17	H	2016-08-04 11:37:27	D二聚体	3140	ng/ml	0-115	H	2016-08-17 10:37:46	*葡萄糖	4.9	mmol/l	3.89-6.11	M	2016-08-04 11:37:27	C反应蛋白	9.22	mg/l	0-8	H	2016-09-06 10:43:46	凝血酶原时间(PT)	11.5	S	42992	M	2016-08-04 10:50:15
665	1000205769007	凝血酶原国际比值	1.05		0.7-1.3	M	2016-11-01 10:50:04	低密度脂蛋白	2.52	mmol/l	健康人群:1.8-3.36;心脑血管疾病危险人群:<2.59	M	2016-11-01 10:46:26	部分凝血活酶时间	28.1	S	20-40	M	2016-11-01 10:50:04	*总胆固醇	4.43	mmol/l	3.6-5.17	M	2016-11-01 10:46:26	D二聚体	620	ng/ml	0-115	H	2016-11-01 10:50:04	*葡萄糖	4.4	mmol/l	3.89-6.11	M	2016-11-01 10:46:26	C反应蛋白	17.17	mg/l	0-8	H	2016-11-03 11:41:18	凝血酶原时间(PT)	12.1	S	42992	M	2016-11-01 10:50:04
666	1000206074002	凝血酶原国际比值	0.97		0.7-1.3	M	2016-12-21 10:30:18	低密度脂蛋白	1.71	mmol/l	健康人群:1.8-3.36;心脑血管疾病危险人群:<2.59	M	2016-12-21 10:44:27	部分凝血活酶时间	33.2	S	20-40	M	2016-12-21 10:26:37	*总胆固醇	4.39	mmol/l	3.6-5.17	M	2016-12-21 10:44:27	D二聚体	1381	ng/ml	0-115	H	2016-12-21 09:50:22	*葡萄糖	6.4	mmol/l	3.89-6.11	H	2016-12-21 10:44:27	C反应蛋白	20.35	mg/l	0-8	H	2016-12-21 10:18:29	凝血酶原时间(PT)	12	S	43023	M	2016-12-21 10:30:18
667	1000206118002	凝血酶原国际比值	0.93		0.7-1.3	M	2016-03-09 16:28:31	低密度脂蛋白	3.73	mmol/l	健康人群:1.8-3.36;心脑血管疾病危险人群:<2.59	M	2016-03-09 10:13:12	部分凝血活酶时间	25.6	S	22-45	M	2016-03-09 16:31:02	*总胆固醇	7.23	mmol/l	3.6-5.17	H	2016-03-09 10:13:12	D二聚体	111	ng/ml	0-115	M	2016-03-09 16:59:01	*葡萄糖	4.58	mmol/l	3.89-6.11	M	2016-03-09 10:13:12	C反应蛋白	0.78	mg/l	0-8	M	2016-03-09 10:13:37	凝血酶原时间(PT)	12.6	S	43023	M	2016-03-09 16:28:31
668	1000206277001	凝血酶原国际比值	1.15		0.7-1.3	M	2014-08-28 07:58:39	低密度脂蛋白	3.76	mmol/l	健康人群:1.8-3.36;心脑血管疾病危险人群:<2.59	M	2014-08-28 07:44:44	部分凝血活酶时间	22.9	S	22-45	M	2014-08-28 07:58:39	*总胆固醇	5.2	mmol/l	3.6-5.17	H	2014-08-28 07:44:44	D二聚体	3940	ng/ml	0-115	H	2014-08-28 07:58:39	*葡萄糖	9.8	mmol/l	3.89-6.11	H	2014-08-28 07:44:44	C反应蛋白	47.1	mg/l	0-8	H	2014-08-28 07:47:07	凝血酶原时间(PT)	13.3	S	42992	M	2014-08-28 07:58:39
669	1000206441002	凝血酶原国际比值	1		0.7-1.3	M	2015-07-24 09:59:15	低密度脂蛋白	2.05	mmol/l	健康人群:1.8-3.36;心脑血管疾病危险人群:<2.59	M	2015-07-24 10:43:48	部分凝血活酶时间	31.5	S	22-45	M	2015-07-24 09:59:15	*总胆固醇	3.75	mmol/l	3.6-5.17	M	2015-07-24 10:43:48	D二聚体	4710	ng/ml	0-115	H	2015-07-24 09:59:15	*葡萄糖	4.6	mmol/l	3.89-6.11	M	2015-07-24 10:43:48	C反应蛋白	23.15	mg/l	0-8	H	2015-07-24 10:43:48	凝血酶原时间(PT)	11.5	S	42992	M	2015-07-24 09:59:15
670	1000206510002	凝血酶原国际比值	1.03		0.7-1.3	M	2015-03-31 10:07:17	低密度脂蛋白	1.55	mmol/l	健康人群:1.8-3.36;心脑血管疾病危险人群:<2.59	M	2015-03-31 09:47:25	部分凝血活酶时间	36.4	S	22-45	M	2015-03-31 10:07:17	*总胆固醇	2.7	mmol/l	3.6-5.17	L	2015-03-31 09:47:25	D二聚体	20	ng/ml	0-115	M	2015-03-31 10:07:17	*葡萄糖	4.48	mmol/l	3.89-6.11	M	2015-03-31 09:47:25	C反应蛋白	0.21	mg/l	0-8	M	2015-03-31 09:52:01	凝血酶原时间(PT)	11.9	S	42992	M	2015-03-31 10:07:17
671	1000206510003	凝血酶原国际比值	0.96		0.7-1.3	M	2016-01-11 13:57:57	低密度脂蛋白	1.27	mmol/l	健康人群:1.8-3.36;心脑血管疾病危险人群:<2.59	M	2016-01-11 13:47:13	部分凝血活酶时间	29.6	S	22-45	M	2016-01-11 13:57:57	*总胆固醇	2.8	mmol/l	3.6-5.17	L	2016-01-11 13:47:13	D二聚体	60	ng/ml	0-115	M	2016-01-11 13:57:57	*葡萄糖	4.9	mmol/l	3.89-6.11	M	2016-01-11 13:47:13	C反应蛋白	2.3	mg/l	0-8	M	2016-01-11 13:50:41	凝血酶原时间(PT)	11.1	S	42992	M	2016-01-11 13:57:57
672	1000206528002	凝血酶原国际比值	0.89		0.7-1.3	M	2015-01-31 09:36:44	低密度脂蛋白	3.59	mmol/l	健康人群:1.8-3.36;心脑血管疾病危险人群:<2.59	M	2015-01-31 09:55:05	部分凝血活酶时间	25.6	S	22-45	M	2015-01-31 09:36:44	*总胆固醇	6.27	mmol/l	3.6-5.17	H	2015-01-31 09:55:05	D二聚体	89	ng/ml	0-115	M	2015-01-31 09:36:44	*葡萄糖	6.35	mmol/l	3.89-6.11	H	2015-01-31 09:55:05	C反应蛋白	2.08	mg/l	0-8	M	2015-01-31 09:16:13	凝血酶原时间(PT)	10.2	S	42992	M	2015-01-31 09:36:44
673	1000206529001	凝血酶原国际比值	1.03		0.7-1.3	M	2014-08-23 10:57:22	低密度脂蛋白	1.41	mmol/l	健康人群:1.8-3.36;心脑血管疾病危险人群:<2.59	M	2014-08-23 09:57:47	部分凝血活酶时间	33.9	S	22-45	M	2014-08-23 10:55:06	*总胆固醇	3.06	mmol/l	3.6-5.17	L	2014-08-23 09:57:47	D二聚体	1028	ng/ml	0-115	H	2014-08-23 09:48:59	*葡萄糖	6.08	mmol/l	3.89-6.11	M	2014-08-23 09:57:47	C反应蛋白	99.63	mg/l	0-8	H	2014-08-28 08:50:25	凝血酶原时间(PT)	13.5	S	43023	M	2014-08-23 10:57:22
674	1000206541002	凝血酶原国际比值	1.05		0.7-1.3	M	2014-11-17 21:49:25	低密度脂蛋白	2.57	mmol/l	健康人群:1.8-3.36;心脑血管疾病危险人群:<2.59	M	2014-11-15 10:11:43	部分凝血活酶时间	30.1	S	22-45	M	2014-11-17 21:49:25	*总胆固醇	4.7	mmol/l	3.6-5.17	M	2014-11-15 10:11:43	D二聚体	4090	ng/ml	0-115	H	2014-11-17 21:49:25	*葡萄糖	6.25	mmol/l	3.89-6.11	H	2014-11-15 10:11:43	C反应蛋白	1.69	mg/l	0-8	M	2014-11-15 10:11:43	凝血酶原时间(PT)	12.1	S	42992	M	2014-11-17 21:49:25
675	1000206730001	凝血酶原国际比值	1.41		0.7-1.3	H	2014-08-27 07:59:25	低密度脂蛋白	2.54	mmol/l	健康人群:1.8-3.36;心脑血管疾病危险人群:<2.59	M	2014-08-27 07:53:24	部分凝血活酶时间	49.7	S	22-45	H	2014-08-27 07:59:25	*总胆固醇	4.4	mmol/l	3.6-5.17	M	2014-08-27 07:53:24	D二聚体	1780	ng/ml	0-115	H	2014-08-27 07:59:25	*葡萄糖	6.2	mmol/l	3.89-6.11	H	2014-08-27 07:53:24	C反应蛋白	25.8	mg/l	0-8	H	2014-09-02 08:04:51	凝血酶原时间(PT)	16.3	S	42992	H	2014-08-27 07:59:25
676	1000206769001	凝血酶原国际比值	0.82		0.7-1.3	M	2014-08-20 10:49:12	低密度脂蛋白	3.78	mmol/l	健康人群:1.8-3.36;心脑血管疾病危险人群:<2.59	M	2014-08-20 09:32:52	部分凝血活酶时间	28.3	S	22-45	M	2014-08-20 10:50:32	*总胆固醇	7.02	mmol/l	3.6-5.17	H	2014-08-20 09:32:52	D二聚体	130	ng/ml	0-115	H	2014-08-20 10:06:28	*葡萄糖	6.31	mmol/l	3.89-6.11	H	2014-08-20 09:32:52	C反应蛋白	1.31	mg/l	0-8	M	2014-08-20 09:32:52	凝血酶原时间(PT)	11	S	43023	M	2014-08-20 10:49:12
677	1000206782001	凝血酶原国际比值	0.97		0.7-1.3	M	2014-08-26 07:34:46	低密度脂蛋白	4.08	mmol/l	健康人群:1.8-3.36;心脑血管疾病危险人群:<2.59	M	2014-08-26 09:01:54	部分凝血活酶时间	29.6	S	22-45	M	2014-08-26 07:22:12	*总胆固醇	6.31	mmol/l	3.6-5.17	H	2014-08-26 09:01:54	D二聚体	1514	ng/ml	0-115	H	2014-08-26 07:25:29	*葡萄糖	3.98	mmol/l	3.89-6.11	M	2014-08-26 09:01:54	C反应蛋白	20.7	mg/l	0-8	H	2014-09-01 09:02:03	凝血酶原时间(PT)	12.8	S	43023	M	2014-08-26 07:34:46
678	1000206816003	凝血酶原国际比值	1		0.7-1.3	M	2016-07-20 09:16:04	低密度脂蛋白	3.85	mmol/l	健康人群:1.8-3.36;心脑血管疾病危险人群:<2.59	M	2016-07-20 09:42:15	部分凝血活酶时间	28.8	S	20-40	M	2016-07-20 09:16:04	*总胆固醇	6.12	mmol/l	3.6-5.17	H	2016-07-20 09:42:15	D二聚体	60	ng/ml	0-115	M	2016-07-20 10:05:32	*葡萄糖	7.99	mmol/l	3.89-6.11	H	2016-07-20 09:42:15	C反应蛋白	1.41	mg/l	0-8	M	2016-07-20 09:42:15	凝血酶原时间(PT)	11.5	S	42992	M	2016-07-20 09:16:04
679	1000206816004	凝血酶原国际比值	0.87		0.7-1.3	M	2016-09-22 10:52:52	低密度脂蛋白	4.49	mmol/l	健康人群:1.8-3.36;心脑血管疾病危险人群:<2.59	M	2016-09-22 09:28:57	部分凝血活酶时间	25	S	20-40	M	2016-09-22 10:52:52	*总胆固醇	6.59	mmol/l	3.6-5.17	H	2016-09-22 09:28:57	D二聚体	110	ng/ml	0-115	M	2016-09-22 10:52:52	*葡萄糖	7.32	mmol/l	3.89-6.11	H	2016-09-22 09:28:57	C反应蛋白	3.61	mg/l	0-8	M	2016-09-22 09:28:57	凝血酶原时间(PT)	10	S	42992	M	2016-09-22 10:52:52
680	1000206817001	凝血酶原国际比值	1.4		0.7-1.3	H	2014-09-17 13:31:24	低密度脂蛋白	4.77	mmol/l	健康人群:1.8-3.36;心脑血管疾病危险人群:<2.59	M	2014-09-17 13:27:55	部分凝血活酶时间	21.8	S	22-45	L	2014-09-17 13:31:24	*总胆固醇	7.6	mmol/l	3.6-5.17	H	2014-09-17 13:27:55	D二聚体	190	ng/ml	0-115	H	2014-09-17 13:31:24	*葡萄糖	4.3	mmol/l	3.89-6.11	M	2014-09-17 13:27:55	C反应蛋白	26.56	mg/l	0-8	H	2014-08-23 10:21:26	凝血酶原时间(PT)	16.1	S	42992	H	2014-09-17 13:31:24
681	1000206826001	凝血酶原国际比值	0.89		0.7-1.3	M	2014-08-21 11:00:09	低密度脂蛋白	0.87	mmol/l	健康人群:1.8-3.36;心脑血管疾病危险人群:<2.59	M	2014-08-21 09:29:23	部分凝血活酶时间	33.8	S	22-45	M	2014-08-21 10:56:13	*总胆固醇	2.92	mmol/l	3.6-5.17	L	2014-08-21 09:29:23	D二聚体	8718	ng/ml	0-115	H	2014-08-21 09:58:54	*葡萄糖	7.68	mmol/l	3.89-6.11	H	2014-08-21 09:29:23	C反应蛋白	6.72	mg/l	0-8	M	2014-09-02 08:57:16	凝血酶原时间(PT)	11.8	S	43023	M	2014-08-21 11:00:09
682	1000206874002	凝血酶原国际比值	1.1		0.7-1.3	M	2014-10-14 09:52:03	低密度脂蛋白	2.48	mmol/l	健康人群:1.8-3.36;心脑血管疾病危险人群:<2.59	M	2014-10-14 09:46:45	部分凝血活酶时间	27.9	S	22-45	M	2014-10-14 09:52:03	*总胆固醇	4.1	mmol/l	3.6-5.17	M	2014-10-14 09:46:45	D二聚体	80	ng/ml	0-115	M	2014-10-14 09:52:03	*葡萄糖	4.47	mmol/l	3.89-6.11	M	2014-10-14 09:46:45	C反应蛋白	0.44	mg/l	0-8	M	2014-10-14 09:46:45	凝血酶原时间(PT)	12.7	S	42992	M	2014-10-14 09:52:03
683	1000206874003	凝血酶原国际比值	0.94		0.7-1.3	M	2016-04-26 10:27:48	低密度脂蛋白	2.46	mmol/l	健康人群:1.8-3.36;心脑血管疾病危险人群:<2.59	M	2016-04-26 09:06:33	部分凝血活酶时间	27.3	S	22-45	M	2016-04-26 10:27:48	*总胆固醇	4.33	mmol/l	3.6-5.17	M	2016-04-26 09:06:33	D二聚体	50	ng/ml	0-115	M	2016-04-26 10:27:48	*葡萄糖	4.39	mmol/l	3.89-6.11	M	2016-04-26 09:06:33	C反应蛋白	1.25	mg/l	0-8	M	2016-04-26 09:06:33	凝血酶原时间(PT)	10.8	S	42992	M	2016-04-26 10:27:48
684	1000206884001	凝血酶原国际比值	0.89		0.7-1.3	M	2014-08-26 10:17:44	低密度脂蛋白	1.55	mmol/l	健康人群:1.8-3.36;心脑血管疾病危险人群:<2.59	M	2014-08-26 09:16:58	部分凝血活酶时间	35.2	S	22-45	M	2014-08-26 10:15:03	*总胆固醇	2.79	mmol/l	3.6-5.17	L	2014-08-26 09:16:58	D二聚体	2053	ng/ml	0-115	H	2014-08-26 09:28:00	*葡萄糖	5.92	mmol/l	3.89-6.11	M	2014-08-26 09:16:58	C反应蛋白	10.5	mg/l	0-8	H	2014-08-27 16:59:45	凝血酶原时间(PT)	11.8	S	43023	M	2014-08-26 10:17:44
685	1000206890002	凝血酶原国际比值	0.9		0.7-1.3	M	2015-04-22 10:05:41	低密度脂蛋白	3.05	mmol/l	健康人群:1.8-3.36;心脑血管疾病危险人群:<2.59	M	2015-04-22 09:55:59	部分凝血活酶时间	31.3	S	22-45	M	2015-04-22 10:05:41	*总胆固醇	5.29	mmol/l	3.6-5.17	H	2015-04-22 09:55:59	D二聚体	20	ng/ml	0-115	M	2015-04-22 10:05:41	*葡萄糖	5.03	mmol/l	3.89-6.11	M	2015-04-22 09:55:59	C反应蛋白	4.34	mg/l	0-8	M	2015-04-22 10:04:26	凝血酶原时间(PT)	10.3	S	42992	M	2015-04-22 10:05:41
686	1000206914001	凝血酶原国际比值	0.97		0.7-1.3	M	2014-08-22 19:32:11	低密度脂蛋白	2.01	mmol/l	健康人群:1.8-3.36;心脑血管疾病危险人群:<2.59	M	2014-08-23 10:12:56	部分凝血活酶时间	30.4	S	22-45	M	2014-08-22 19:20:33	*总胆固醇	3.48	mmol/l	3.6-5.17	L	2014-08-23 10:12:56	D二聚体	4638	ng/ml	0-115	H	2014-08-22 19:24:30	*葡萄糖	4.62	mmol/l	3.89-6.11	M	2014-08-23 10:12:56	C反应蛋白	192.7	mg/l	0-8	H	2014-08-25 10:31:43	凝血酶原时间(PT)	12.7	S	43023	M	2014-08-22 19:32:11
687	1000206926001	凝血酶原国际比值	1.43		0.7-1.3	H	2014-08-20 10:26:28	低密度脂蛋白	2.61	mmol/l	健康人群:1.8-3.36;心脑血管疾病危险人群:<2.59	M	2014-08-20 09:06:16	部分凝血活酶时间	33.4	S	22-45	M	2014-08-20 10:26:28	*总胆固醇	4.44	mmol/l	3.6-5.17	M	2014-08-20 09:06:16	D二聚体	60	ng/ml	0-115	M	2014-08-20 10:26:28	*葡萄糖	5.43	mmol/l	3.89-6.11	M	2014-08-20 09:06:16	C反应蛋白	2.56	mg/l	0-8	M	2014-08-27 11:27:05	凝血酶原时间(PT)	16.5	S	42992	H	2014-08-20 10:26:28
688	1000206926002	凝血酶原国际比值	1.33		0.7-1.3	H	2014-11-05 09:50:28	低密度脂蛋白	3.7	mmol/l	健康人群:1.8-3.36;心脑血管疾病危险人群:<2.59	M	2014-11-05 10:01:46	部分凝血活酶时间	30.3	S	22-45	M	2014-11-05 09:50:28	*总胆固醇	6.58	mmol/l	3.6-5.17	H	2014-11-05 10:01:46	D二聚体	30	ng/ml	0-115	M	2014-11-05 09:50:28	*葡萄糖	5.54	mmol/l	3.89-6.11	M	2014-11-05 10:01:46	C反应蛋白	3.11	mg/l	0-8	M	2014-11-05 09:29:36	凝血酶原时间(PT)	15.3	S	42992	H	2014-11-05 09:50:28
689	1000207017003	凝血酶原国际比值	1.01		0.7-1.3	M	2015-11-26 09:24:52	低密度脂蛋白	2.11	mmol/l	健康人群:1.8-3.36;心脑血管疾病危险人群:<2.59	M	2015-11-26 09:14:22	部分凝血活酶时间	28.6	S	22-45	M	2015-11-26 09:24:52	*总胆固醇	3.83	mmol/l	3.6-5.17	M	2015-11-26 09:14:22	D二聚体	7040	ng/ml	0-115	H	2015-11-26 09:24:52	*葡萄糖	6.07	mmol/l	3.89-6.11	M	2015-11-26 09:14:22	C反应蛋白	109.59	mg/l	0-8	H	2015-12-03 11:16:17	凝血酶原时间(PT)	11.6	S	42992	M	2015-11-26 09:24:52
690	1000207032001	凝血酶原国际比值	1.01		0.7-1.3	M	2014-08-20 10:56:42	低密度脂蛋白	1.8	mmol/l	健康人群:1.8-3.36;心脑血管疾病危险人群:<2.59	M	2014-08-20 09:22:25	部分凝血活酶时间	26.6	S	22-45	M	2014-08-20 10:56:42	*总胆固醇	4.15	mmol/l	3.6-5.17	M	2014-08-20 09:22:25	D二聚体	210	ng/ml	0-115	H	2014-08-20 10:56:42	*葡萄糖	5.57	mmol/l	3.89-6.11	M	2014-08-20 09:22:25	C反应蛋白	9.1	mg/l	0-8	H	2014-08-27 08:00:01	凝血酶原时间(PT)	11.6	S	42992	M	2014-08-20 10:56:42
691	1000207036001	凝血酶原国际比值	1.08		0.7-1.3	M	2014-08-20 11:06:09	低密度脂蛋白	2.71	mmol/l	健康人群:1.8-3.36;心脑血管疾病危险人群:<2.59	M	2014-08-20 08:28:19	部分凝血活酶时间	30.6	S	22-45	M	2014-08-20 11:06:09	*总胆固醇	4.73	mmol/l	3.6-5.17	M	2014-08-20 08:28:19	D二聚体	360	ng/ml	0-115	H	2014-08-20 11:06:09	*葡萄糖	4.65	mmol/l	3.89-6.11	M	2014-08-20 08:28:19	C反应蛋白	74.21	mg/l	0-8	H	2014-08-20 11:07:53	凝血酶原时间(PT)	12.4	S	42992	M	2014-08-20 11:06:09
692	1000207040001	凝血酶原国际比值	0.98		0.7-1.3	M	2014-08-20 11:14:40	低密度脂蛋白	2.51	mmol/l	健康人群:1.8-3.36;心脑血管疾病危险人群:<2.59	M	2014-08-20 09:06:13	部分凝血活酶时间	31.1	S	22-45	M	2014-08-20 11:14:40	*总胆固醇	4.38	mmol/l	3.6-5.17	M	2014-08-20 09:06:13	D二聚体	2730	ng/ml	0-115	H	2014-08-20 11:14:40	*葡萄糖	6.72	mmol/l	3.89-6.11	H	2014-08-20 09:06:13	C反应蛋白	90.66	mg/l	0-8	H	2014-08-20 09:06:13	凝血酶原时间(PT)	11.3	S	42992	M	2014-08-20 11:14:40
693	1000207040002	凝血酶原国际比值	0.92		0.7-1.3	M	2015-10-17 11:14:39	低密度脂蛋白	1.9	mmol/l	健康人群:1.8-3.36;心脑血管疾病危险人群:<2.59	M	2015-10-17 10:15:44	部分凝血活酶时间	37	S	22-45	M	2015-10-17 11:09:53	*总胆固醇	3.88	mmol/l	3.6-5.17	M	2015-10-17 10:15:44	D二聚体	1251	ng/ml	0-115	H	2015-10-17 10:38:02	*葡萄糖	12.13	mmol/l	3.89-6.11	H	2015-10-17 10:15:44	C反应蛋白	62.7	mg/l	0-8	H	2015-10-17 10:15:44	凝血酶原时间(PT)	12.1	S	43023	M	2015-10-17 11:14:39
694	1000207040004	凝血酶原国际比值	0.9		0.7-1.3	M	2016-01-09 11:05:22	低密度脂蛋白	3.1	mmol/l	健康人群:1.8-3.36;心脑血管疾病危险人群:<2.59	M	2016-01-09 10:00:10	部分凝血活酶时间	40.9	S	22-45	M	2016-01-09 10:53:38	*总胆固醇	5.33	mmol/l	3.6-5.17	H	2016-01-09 10:00:10	D二聚体	1096	ng/ml	0-115	H	2016-01-09 10:29:31	*葡萄糖	5.55	mmol/l	3.89-6.11	M	2016-01-09 10:00:10	C反应蛋白	7.66	mg/l	0-8	M	2016-01-09 10:00:10	凝血酶原时间(PT)	11.8	S	43023	M	2016-01-09 11:05:22
695	1000207040005	凝血酶原国际比值	1.01		0.7-1.3	M	2016-11-16 09:25:53	低密度脂蛋白	3.03	mmol/l	健康人群:1.8-3.36;心脑血管疾病危险人群:<2.59	M	2016-11-16 09:37:02	部分凝血活酶时间	23.4	S	20-40	M	2016-11-16 09:25:53	*总胆固醇	4.46	mmol/l	3.6-5.17	M	2016-11-16 09:37:02	D二聚体	50	ng/ml	0-115	M	2016-11-16 09:25:53	*葡萄糖	6.36	mmol/l	3.89-6.11	H	2016-11-16 09:37:02	C反应蛋白	28.63	mg/l	0-8	H	2016-11-16 09:37:02	凝血酶原时间(PT)	11.6	S	42992	M	2016-11-16 09:25:53
696	1000207050001	凝血酶原国际比值	1.09		0.7-1.3	M	2014-08-20 09:57:30	低密度脂蛋白	2.3	mmol/l	健康人群:1.8-3.36;心脑血管疾病危险人群:<2.59	M	2014-08-20 09:24:47	部分凝血活酶时间	28	S	22-45	M	2014-08-20 09:57:30	*总胆固醇	4.03	mmol/l	3.6-5.17	M	2014-08-20 09:24:47	D二聚体	3800	ng/ml	0-115	H	2014-08-20 09:57:30	*葡萄糖	4.8	mmol/l	3.89-6.11	M	2014-08-20 09:24:47	C反应蛋白	245.7	mg/l	0-8	H	2014-09-05 11:11:32	凝血酶原时间(PT)	12.5	S	42992	M	2014-08-20 09:57:30
697	1000207067001	凝血酶原国际比值	1.1		0.7-1.3	M	2014-08-21 09:50:22	低密度脂蛋白	2.86	mmol/l	健康人群:1.8-3.36;心脑血管疾病危险人群:<2.59	M	2014-08-21 09:34:41	部分凝血活酶时间	22.9	S	22-45	M	2014-08-21 11:13:58	*总胆固醇	4.84	mmol/l	3.6-5.17	M	2014-08-21 09:34:41	D二聚体	100	ng/ml	0-115	M	2014-08-21 11:14:02	*葡萄糖	4.66	mmol/l	3.89-6.11	M	2014-08-21 09:34:41	C反应蛋白	3.89	mg/l	0-8	M	2014-08-21 09:36:46	凝血酶原时间(PT)	12.7	S	42992	M	2014-08-21 09:50:22
698	1000207085001	凝血酶原国际比值	1.01		0.7-1.3	M	2014-08-21 09:52:42	低密度脂蛋白	2.74	mmol/l	健康人群:1.8-3.36;心脑血管疾病危险人群:<2.59	M	2014-08-21 09:05:49	部分凝血活酶时间	28.6	S	22-45	M	2014-08-21 09:52:42	*总胆固醇	4.9	mmol/l	3.6-5.17	M	2014-08-21 09:05:49	D二聚体	80	ng/ml	0-115	M	2014-08-21 09:52:42	*葡萄糖	5.03	mmol/l	3.89-6.11	M	2014-08-21 09:05:49	C反应蛋白	0.8	mg/l	0-8	M	2014-08-21 09:50:36	凝血酶原时间(PT)	11.6	S	42992	M	2014-08-21 09:52:42
699	1000207106001	凝血酶原国际比值	0.9		0.7-1.3	M	2014-08-21 11:18:42	低密度脂蛋白	2.09	mmol/l	健康人群:1.8-3.36;心脑血管疾病危险人群:<2.59	M	2014-08-21 09:50:05	部分凝血活酶时间	31.7	S	22-45	M	2014-08-21 11:11:40	*总胆固醇	4.19	mmol/l	3.6-5.17	M	2014-08-21 09:50:05	D二聚体	190	ng/ml	0-115	H	2014-08-21 10:23:17	*葡萄糖	5.48	mmol/l	3.89-6.11	M	2014-08-21 09:50:05	C反应蛋白	1.08	mg/l	0-8	M	2014-08-21 09:50:05	凝血酶原时间(PT)	12	S	43023	M	2014-08-21 11:18:42
700	1000207112001	凝血酶原国际比值	0.88		0.7-1.3	M	2014-08-21 11:07:58	低密度脂蛋白	3.09	mmol/l	健康人群:1.8-3.36;心脑血管疾病危险人群:<2.59	M	2014-08-21 09:30:02	部分凝血活酶时间	42.2	S	22-45	M	2014-08-21 11:04:06	*总胆固醇	5.15	mmol/l	3.6-5.17	M	2014-08-21 09:30:02	D二聚体	247	ng/ml	0-115	H	2014-08-21 10:08:57	*葡萄糖	4.79	mmol/l	3.89-6.11	M	2014-08-21 09:30:02	C反应蛋白	17.81	mg/l	0-8	H	2014-09-02 08:05:12	凝血酶原时间(PT)	11.7	S	43023	M	2014-08-21 11:07:58
701	1000207115001	凝血酶原国际比值	0.94		0.7-1.3	M	2014-08-21 10:54:04	低密度脂蛋白	2.4	mmol/l	健康人群:1.8-3.36;心脑血管疾病危险人群:<2.59	M	2014-08-21 09:53:34	部分凝血活酶时间	23.1	S	22-45	M	2014-08-21 10:54:04	*总胆固醇	4.35	mmol/l	3.6-5.17	M	2014-08-21 09:53:34	D二聚体	30	ng/ml	0-115	M	2014-08-21 10:54:04	*葡萄糖	12.06	mmol/l	3.89-6.11	H	2014-08-21 09:53:34	C反应蛋白	2.48	mg/l	0-8	M	2014-08-21 09:53:34	凝血酶原时间(PT)	10.8	S	42992	M	2014-08-21 10:54:04
702	1000207175001	凝血酶原国际比值	1.06		0.7-1.3	M	2014-08-26 00:21:03	低密度脂蛋白	0.49	mmol/l	健康人群:1.8-3.36;心脑血管疾病危险人群:<2.59	M	2014-08-21 09:49:38	部分凝血活酶时间	42.5	S	22-45	M	2014-08-26 00:09:52	*总胆固醇	1.55	mmol/l	3.6-5.17	L	2014-08-21 09:49:38	D二聚体	837	ng/ml	0-115	H	2014-08-26 00:18:23	*葡萄糖	8.9	mmol/l	3.89-6.11	H	2014-08-21 09:49:38	C反应蛋白	330.6	mg/l	0-8	H	2014-08-23 10:13:26	凝血酶原时间(PT)	13.8	S	43023	M	2014-08-26 00:21:03
703	1000207196001	凝血酶原国际比值	0.9		0.7-1.3	M	2014-08-22 10:35:42	低密度脂蛋白	2.61	mmol/l	健康人群:1.8-3.36;心脑血管疾病危险人群:<2.59	M	2014-08-22 08:56:08	部分凝血活酶时间	26.9	S	22-45	M	2014-08-22 10:36:23	*总胆固醇	5.03	mmol/l	3.6-5.17	M	2014-08-22 08:56:08	D二聚体	717	ng/ml	0-115	H	2014-08-22 09:39:56	*葡萄糖	7.4	mmol/l	3.89-6.11	H	2014-08-22 08:56:08	C反应蛋白	0.94	mg/l	0-8	M	2014-08-22 08:56:08	凝血酶原时间(PT)	11.9	S	43023	M	2014-08-22 10:35:42
704	1000207212001	凝血酶原国际比值	0.92		0.7-1.3	M	2014-08-21 13:15:04	低密度脂蛋白	5.05	mmol/l	健康人群:1.8-3.36;心脑血管疾病危险人群:<2.59	M	2014-08-21 13:03:00	部分凝血活酶时间	33.5	S	22-45	M	2014-08-21 13:09:01	*总胆固醇	8.6	mmol/l	3.6-5.17	H	2014-08-21 13:03:00	D二聚体	98	ng/ml	0-115	M	2014-08-21 13:09:12	*葡萄糖	11.8	mmol/l	3.89-6.11	H	2014-08-21 13:03:00	C反应蛋白	3.3	mg/l	0-8	M	2014-08-21 13:03:00	凝血酶原时间(PT)	12.2	S	43023	M	2014-08-21 13:15:04
705	1000207212002	凝血酶原国际比值	1.24		0.7-1.3	M	2014-10-04 11:24:05	低密度脂蛋白	2.05	mmol/l	健康人群:1.8-3.36;心脑血管疾病危险人群:<2.59	M	2014-10-04 11:25:47	部分凝血活酶时间	26.9	S	22-45	M	2014-10-04 11:46:07	*总胆固醇	3.94	mmol/l	3.6-5.17	M	2014-10-04 11:25:47	D二聚体	70	ng/ml	0-115	M	2014-10-04 11:24:05	*葡萄糖	6.02	mmol/l	3.89-6.11	M	2014-10-04 11:25:47	C反应蛋白	1.58	mg/l	0-8	M	2014-10-04 11:25:47	凝血酶原时间(PT)	14.3	S	42992	H	2014-10-04 11:24:05
706	1000207236001	凝血酶原国际比值	1		0.7-1.3	M	2014-08-22 09:43:33	低密度脂蛋白	1.72	mmol/l	健康人群:1.8-3.36;心脑血管疾病危险人群:<2.59	M	2014-08-22 09:10:17	部分凝血活酶时间	22.1	S	22-45	M	2014-08-22 10:51:51	*总胆固醇	3.6	mmol/l	3.6-5.17	M	2014-08-22 09:10:17	D二聚体	110	ng/ml	0-115	M	2014-08-22 09:43:33	*葡萄糖	4.7	mmol/l	3.89-6.11	M	2014-08-22 09:10:17	C反应蛋白	3.95	mg/l	0-8	M	2014-08-22 09:10:17	凝血酶原时间(PT)	11.5	S	42992	M	2014-08-22 09:43:33
707	1000207289001	凝血酶原国际比值	1.03		0.7-1.3	M	2014-08-22 10:58:44	低密度脂蛋白	3.02	mmol/l	健康人群:1.8-3.36;心脑血管疾病危险人群:<2.59	M	2014-08-22 11:33:22	部分凝血活酶时间	24.5	S	22-45	M	2014-08-22 10:58:44	*总胆固醇	5.79	mmol/l	3.6-5.17	H	2014-08-22 11:33:22	D二聚体	190	ng/ml	0-115	H	2014-08-22 10:58:44	*葡萄糖	5.62	mmol/l	3.89-6.11	M	2014-08-22 11:33:22	C反应蛋白	1.05	mg/l	0-8	M	2014-08-22 11:33:22	凝血酶原时间(PT)	11.9	S	42992	M	2014-08-22 10:58:44
708	1000207298001	凝血酶原国际比值	0.91		0.7-1.3	M	2014-08-23 10:47:11	低密度脂蛋白	3.84	mmol/l	健康人群:1.8-3.36;心脑血管疾病危险人群:<2.59	M	2014-08-23 09:07:54	部分凝血活酶时间	24.4	S	22-45	M	2014-08-23 11:09:26	*总胆固醇	6.39	mmol/l	3.6-5.17	H	2014-08-23 09:07:54	D二聚体	100	ng/ml	0-115	M	2014-08-23 10:47:11	*葡萄糖	4.58	mmol/l	3.89-6.11	M	2014-08-23 09:07:54	C反应蛋白	1.94	mg/l	0-8	M	2014-08-26 11:29:51	凝血酶原时间(PT)	10.5	S	42992	M	2014-08-23 10:47:11
709	1000207321001	凝血酶原国际比值	0.91		0.7-1.3	M	2014-08-23 10:12:43	低密度脂蛋白	2.04	mmol/l	健康人群:1.8-3.36;心脑血管疾病危险人群:<2.59	M	2014-08-23 09:56:40	部分凝血活酶时间	22.8	S	22-45	M	2014-08-23 11:08:41	*总胆固醇	4.46	mmol/l	3.6-5.17	M	2014-08-23 09:56:40	D二聚体	170	ng/ml	0-115	H	2014-08-23 10:12:43	*葡萄糖	3.15	mmol/l	3.89-6.11	L	2014-08-23 09:56:40	C反应蛋白	2.62	mg/l	0-8	M	2014-08-23 09:56:40	凝血酶原时间(PT)	10.4	S	42992	M	2014-08-23 10:12:43
710	1000207359001	凝血酶原国际比值	1.06		0.7-1.3	M	2014-08-23 11:12:05	低密度脂蛋白	1.06	mmol/l	健康人群:1.8-3.36;心脑血管疾病危险人群:<2.59	M	2014-08-23 10:07:45	部分凝血活酶时间	31	S	22-45	M	2014-08-23 11:12:05	*总胆固醇	2.45	mmol/l	3.6-5.17	L	2014-08-23 10:07:45	D二聚体	4870	ng/ml	0-115	H	2014-08-23 11:12:05	*葡萄糖	5.56	mmol/l	3.89-6.11	M	2014-08-23 10:07:45	C反应蛋白	49.12	mg/l	0-8	H	2014-09-01 10:34:55	凝血酶原时间(PT)	12.2	S	42992	M	2014-08-23 11:12:05
711	1000207363001	凝血酶原国际比值	0.94		0.7-1.3	M	2014-10-28 08:41:34	低密度脂蛋白	1.61	mmol/l	健康人群:1.8-3.36;心脑血管疾病危险人群:<2.59	M	2014-10-28 11:22:15	部分凝血活酶时间	33.3	S	22-45	M	2014-10-28 08:35:52	*总胆固醇	2.85	mmol/l	3.6-5.17	L	2014-10-28 11:22:15	D二聚体	290	ng/ml	0-115	H	2014-12-10 10:21:40	*葡萄糖	5.99	mmol/l	3.89-6.11	M	2014-10-01 09:15:46	C反应蛋白	32.96	mg/l	0-8	H	2014-10-01 09:15:46	凝血酶原时间(PT)	12.4	S	43023	M	2014-10-28 08:41:34
712	1000207425001	凝血酶原国际比值	1.08		0.7-1.3	M	2014-08-24 09:11:23	低密度脂蛋白	1.57	mmol/l	健康人群:1.8-3.36;心脑血管疾病危险人群:<2.59	M	2014-08-24 09:11:51	部分凝血活酶时间	20.7	S	22-45	L	2014-08-24 09:11:23	*总胆固醇	3.2	mmol/l	3.6-5.17	L	2014-08-24 09:11:51	D二聚体	420	ng/ml	0-115	H	2014-08-24 09:11:23	*葡萄糖	4.1	mmol/l	3.89-6.11	M	2014-08-24 09:11:51	C反应蛋白	1.6	mg/l	0-8	M	2014-08-24 09:08:19	凝血酶原时间(PT)	12.4	S	42992	M	2014-08-24 09:11:23
713	1000207437002	凝血酶原国际比值	1.01		0.7-1.3	M	2015-01-23 09:15:37	低密度脂蛋白	2.2	mmol/l	健康人群:1.8-3.36;心脑血管疾病危险人群:<2.59	M	2015-01-23 09:28:56	部分凝血活酶时间	32.4	S	22-45	M	2015-01-23 09:15:37	*总胆固醇	3.72	mmol/l	3.6-5.17	M	2015-01-23 09:28:56	D二聚体	330	ng/ml	0-115	H	2015-01-23 09:15:37	*葡萄糖	5.63	mmol/l	3.89-6.11	M	2015-01-23 09:28:56	C反应蛋白	15.27	mg/l	0-8	H	2015-02-05 09:28:26	凝血酶原时间(PT)	11.6	S	42992	M	2015-01-23 09:15:37
714	1000207459001	凝血酶原国际比值	1.08		0.7-1.3	M	2014-08-25 10:14:09	低密度脂蛋白	2.22	mmol/l	健康人群:1.8-3.36;心脑血管疾病危险人群:<2.59	M	2014-08-25 09:08:24	部分凝血活酶时间	22.1	S	22-45	M	2014-08-25 11:21:40	*总胆固醇	4.37	mmol/l	3.6-5.17	M	2014-08-25 09:08:24	D二聚体	3690	ng/ml	0-115	H	2014-08-25 10:14:09	*葡萄糖	4.88	mmol/l	3.89-6.11	M	2014-08-25 09:08:24	C反应蛋白	33.09	mg/l	0-8	H	2014-08-25 09:27:29	凝血酶原时间(PT)	12.4	S	42992	M	2014-08-25 10:14:09
715	1000207500001	凝血酶原国际比值	1.15		0.7-1.3	M	2014-08-26 10:45:17	低密度脂蛋白	2.11	mmol/l	健康人群:1.8-3.36;心脑血管疾病危险人群:<2.59	M	2014-08-26 09:17:07	部分凝血活酶时间	24.5	S	22-45	M	2014-08-26 10:45:17	*总胆固醇	3.95	mmol/l	3.6-5.17	M	2014-08-26 09:17:07	D二聚体	200	ng/ml	0-115	H	2014-08-26 10:45:17	*葡萄糖	5.56	mmol/l	3.89-6.11	M	2014-08-26 09:17:07	C反应蛋白	6.99	mg/l	0-8	M	2014-09-06 09:21:24	凝血酶原时间(PT)	13.2	S	42992	M	2014-08-26 10:45:17
716	1000207507001	凝血酶原国际比值	1.01		0.7-1.3	M	2014-08-26 09:44:23	低密度脂蛋白	2.77	mmol/l	健康人群:1.8-3.36;心脑血管疾病危险人群:<2.59	M	2014-08-28 09:31:12	部分凝血活酶时间	23.3	S	22-45	M	2014-08-26 11:33:58	*总胆固醇	5.59	mmol/l	3.6-5.17	H	2014-08-28 09:31:12	D二聚体	20	ng/ml	0-115	M	2014-08-26 09:44:23	*葡萄糖	5.5	mmol/l	3.89-6.11	M	2014-08-28 09:31:12	C反应蛋白	2.25	mg/l	0-8	M	2014-08-28 09:34:57	凝血酶原时间(PT)	11.6	S	42992	M	2014-08-26 09:44:23
717	1000207515001	凝血酶原国际比值	0.9		0.7-1.3	M	2014-08-26 09:51:58	低密度脂蛋白	2.63	mmol/l	健康人群:1.8-3.36;心脑血管疾病危险人群:<2.59	M	2014-08-26 09:27:21	部分凝血活酶时间	26.1	S	22-45	M	2014-08-26 09:49:22	*总胆固醇	4.13	mmol/l	3.6-5.17	M	2014-08-26 09:27:21	D二聚体	3897	ng/ml	0-115	H	2014-08-26 09:21:19	*葡萄糖	5.42	mmol/l	3.89-6.11	M	2014-08-26 09:27:21	C反应蛋白	71.5	mg/l	0-8	H	2014-08-26 09:44:33	凝血酶原时间(PT)	12	S	43023	M	2014-08-26 09:51:58
718	1000207548001	凝血酶原国际比值	1.09		0.7-1.3	M	2014-08-26 11:35:12	低密度脂蛋白	3.46	mmol/l	健康人群:1.8-3.36;心脑血管疾病危险人群:<2.59	M	2014-08-26 09:17:08	部分凝血活酶时间	39.8	S	22-45	M	2014-08-26 11:35:12	*总胆固醇	6.1	mmol/l	3.6-5.17	H	2014-08-26 09:17:08	D二聚体	100	ng/ml	0-115	M	2014-08-26 11:36:35	*葡萄糖	4.79	mmol/l	3.89-6.11	M	2014-08-26 09:17:08	C反应蛋白	1.61	mg/l	0-8	M	2014-08-26 09:16:49	凝血酶原时间(PT)	12.5	S	42992	M	2014-08-26 11:35:12
719	1000207560001	凝血酶原国际比值	1.04		0.7-1.3	M	2014-08-26 10:01:15	低密度脂蛋白	2.69	mmol/l	健康人群:1.8-3.36;心脑血管疾病危险人群:<2.59	M	2014-08-26 09:26:37	部分凝血活酶时间	23.5	S	22-45	M	2014-08-26 10:01:15	*总胆固醇	4.84	mmol/l	3.6-5.17	M	2014-08-26 09:26:37	D二聚体	110	ng/ml	0-115	M	2014-08-26 10:01:15	*葡萄糖	6.11	mmol/l	3.89-6.11	M	2014-08-26 09:26:37	C反应蛋白	1.04	mg/l	0-8	M	2014-08-26 09:26:37	凝血酶原时间(PT)	12	S	42992	M	2014-08-26 10:01:15
720	1000207561001	凝血酶原国际比值	0.84		0.7-1.3	M	2014-08-26 09:37:33	低密度脂蛋白	3.26	mmol/l	健康人群:1.8-3.36;心脑血管疾病危险人群:<2.59	M	2014-08-26 09:09:55	部分凝血活酶时间	32.8	S	22-45	M	2014-08-26 09:31:56	*总胆固醇	5.77	mmol/l	3.6-5.17	H	2014-08-26 09:09:55	D二聚体	87	ng/ml	0-115	M	2014-08-26 09:05:55	*葡萄糖	5.15	mmol/l	3.89-6.11	M	2014-08-26 09:09:55	C反应蛋白	0.5	mg/l	0-8	M	2014-08-26 09:09:55	凝血酶原时间(PT)	11.2	S	43023	M	2014-08-26 09:37:33
721	1000207564001	凝血酶原国际比值	0.9		0.7-1.3	M	2014-08-26 10:53:07	低密度脂蛋白	2.02	mmol/l	健康人群:1.8-3.36;心脑血管疾病危险人群:<2.59	M	2014-08-26 11:20:34	部分凝血活酶时间	25.7	S	22-45	M	2014-08-26 10:51:42	*总胆固醇	4.01	mmol/l	3.6-5.17	M	2014-08-26 11:20:34	D二聚体	63	ng/ml	0-115	M	2014-08-26 10:54:43	*葡萄糖	6.04	mmol/l	3.89-6.11	M	2014-08-26 11:20:34	C反应蛋白	3.85	mg/l	0-8	M	2014-08-26 11:20:34	凝血酶原时间(PT)	12	S	43023	M	2014-08-26 10:53:07
722	1000207569001	凝血酶原国际比值	0.9		0.7-1.3	M	2014-08-26 10:24:02	低密度脂蛋白	2.77	mmol/l	健康人群:1.8-3.36;心脑血管疾病危险人群:<2.59	M	2014-08-26 09:44:12	部分凝血活酶时间	32.2	S	22-45	M	2014-08-26 10:21:47	*总胆固醇	4.51	mmol/l	3.6-5.17	M	2014-08-26 09:44:12	D二聚体	164	ng/ml	0-115	H	2014-08-26 09:32:06	*葡萄糖	4.81	mmol/l	3.89-6.11	M	2014-08-26 09:44:12	C反应蛋白	6.21	mg/l	0-8	M	2014-08-26 09:41:09	凝血酶原时间(PT)	11.9	S	43023	M	2014-08-26 10:24:02
723	1000207580001	凝血酶原国际比值	0.83		0.7-1.3	M	2014-08-26 10:17:49	低密度脂蛋白	2.71	mmol/l	健康人群:1.8-3.36;心脑血管疾病危险人群:<2.59	M	2014-08-26 10:12:39	部分凝血活酶时间	30.7	S	22-45	M	2014-08-26 10:14:58	*总胆固醇	4.77	mmol/l	3.6-5.17	M	2014-08-26 10:12:39	D二聚体	564	ng/ml	0-115	H	2014-08-26 09:30:20	*葡萄糖	4.92	mmol/l	3.89-6.11	M	2014-08-26 10:12:39	C反应蛋白	7.34	mg/l	0-8	M	2014-08-26 10:12:39	凝血酶原时间(PT)	11.1	S	43023	M	2014-08-26 10:17:49
724	1000207581001	凝血酶原国际比值	1.08		0.7-1.3	M	2014-08-26 09:11:38	低密度脂蛋白	2.79	mmol/l	健康人群:1.8-3.36;心脑血管疾病危险人群:<2.59	M	2014-08-26 09:33:51	部分凝血活酶时间	22.8	S	22-45	M	2014-08-26 10:49:11	*总胆固醇	5.68	mmol/l	3.6-5.17	H	2014-08-26 09:33:51	D二聚体	190	ng/ml	0-115	H	2014-08-26 09:11:38	*葡萄糖	4.4	mmol/l	3.89-6.11	M	2014-08-26 09:33:51	C反应蛋白	2.56	mg/l	0-8	M	2014-08-26 09:33:51	凝血酶原时间(PT)	12.4	S	42992	M	2014-08-26 09:11:38
725	1000207584001	凝血酶原国际比值	0.86		0.7-1.3	M	2014-08-26 10:24:18	低密度脂蛋白	3.08	mmol/l	健康人群:1.8-3.36;心脑血管疾病危险人群:<2.59	M	2014-08-26 09:44:31	部分凝血活酶时间	29.7	S	22-45	M	2014-08-26 10:21:52	*总胆固醇	5.47	mmol/l	3.6-5.17	H	2014-08-26 09:44:31	D二聚体	549	ng/ml	0-115	H	2014-08-26 09:42:44	*葡萄糖	5.96	mmol/l	3.89-6.11	M	2014-08-26 09:44:31	C反应蛋白	4.89	mg/l	0-8	M	2014-08-26 09:44:31	凝血酶原时间(PT)	11.5	S	43023	M	2014-08-26 10:24:18
726	1000207611001	凝血酶原国际比值	0.89		0.7-1.3	M	2014-08-26 10:24:07	低密度脂蛋白	1.95	mmol/l	健康人群:1.8-3.36;心脑血管疾病危险人群:<2.59	M	2014-08-26 09:52:55	部分凝血活酶时间	31.3	S	22-45	M	2014-08-26 10:21:57	*总胆固醇	4.09	mmol/l	3.6-5.17	M	2014-08-26 09:52:55	D二聚体	73	ng/ml	0-115	M	2014-08-26 09:32:47	*葡萄糖	3.45	mmol/l	3.89-6.11	L	2014-08-26 09:52:55	C反应蛋白	4.97	mg/l	0-8	M	2014-08-26 09:52:55	凝血酶原时间(PT)	11.8	S	43023	M	2014-08-26 10:24:07
727	1000207652001	凝血酶原国际比值	0.87		0.7-1.3	M	2014-08-28 09:53:24	低密度脂蛋白	3.39	mmol/l	健康人群:1.8-3.36;心脑血管疾病危险人群:<2.59	M	2014-08-28 09:19:02	部分凝血活酶时间	29.3	S	22-45	M	2014-08-28 09:49:32	*总胆固醇	6.58	mmol/l	3.6-5.17	H	2014-08-28 09:19:02	D二聚体	170	ng/ml	0-115	H	2014-08-28 09:03:20	*葡萄糖	4.86	mmol/l	3.89-6.11	M	2014-08-28 09:19:02	C反应蛋白	2.06	mg/l	0-8	M	2014-08-28 09:19:02	凝血酶原时间(PT)	11.6	S	43023	M	2014-08-28 09:53:24
728	1000207655001	凝血酶原国际比值	0.89		0.7-1.3	M	2014-08-27 10:05:37	低密度脂蛋白	2.71	mmol/l	健康人群:1.8-3.36;心脑血管疾病危险人群:<2.59	M	2014-08-27 09:11:06	部分凝血活酶时间	29.2	S	22-45	M	2014-08-27 10:07:08	*总胆固醇	5.97	mmol/l	3.6-5.17	H	2014-08-27 09:11:06	D二聚体	395	ng/ml	0-115	H	2014-08-27 09:47:03	*葡萄糖	6.72	mmol/l	3.89-6.11	H	2014-08-27 09:11:06	C反应蛋白	4.54	mg/l	0-8	M	2014-08-27 09:11:06	凝血酶原时间(PT)	11.8	S	43023	M	2014-08-27 10:05:37
729	1000207664001	凝血酶原国际比值	1.7		0.7-1.3	H	2014-08-27 07:38:00	低密度脂蛋白	3.06	mmol/l	健康人群:1.8-3.36;心脑血管疾病危险人群:<2.59	M	2014-08-27 08:02:43	部分凝血活酶时间	44.7	S	22-45	M	2014-08-27 07:38:00	*总胆固醇	5.3	mmol/l	3.6-5.17	H	2014-08-27 08:02:43	D二聚体	300	ng/ml	0-115	H	2014-08-27 07:41:39	*葡萄糖	4.9	mmol/l	3.89-6.11	M	2014-08-27 08:02:43	C反应蛋白	1.5	mg/l	0-8	M	2014-08-27 08:02:43	凝血酶原时间(PT)	19.6	S	42992	H	2014-08-27 07:38:00
730	1000207666001	凝血酶原国际比值	1.14		0.7-1.3	M	2014-08-27 10:18:00	低密度脂蛋白	2.07	mmol/l	健康人群:1.8-3.36;心脑血管疾病危险人群:<2.59	M	2014-08-27 09:30:30	部分凝血活酶时间	30.5	S	22-45	M	2014-08-27 10:18:00	*总胆固醇	3.95	mmol/l	3.6-5.17	M	2014-08-27 09:30:30	D二聚体	320	ng/ml	0-115	H	2014-08-27 11:00:29	*葡萄糖	5.23	mmol/l	3.89-6.11	M	2014-08-27 09:30:30	C反应蛋白	0.99	mg/l	0-8	M	2014-08-27 09:30:30	凝血酶原时间(PT)	13.1	S	42992	M	2014-08-27 10:18:00
731	1000207675001	凝血酶原国际比值	1.31		0.7-1.3	H	2014-08-26 13:20:52	低密度脂蛋白	1.66	mmol/l	健康人群:1.8-3.36;心脑血管疾病危险人群:<2.59	M	2014-08-26 13:20:16	部分凝血活酶时间	58.1	S	22-45	H	2014-08-26 14:12:05	*总胆固醇	3.6	mmol/l	3.6-5.17	M	2014-08-26 13:20:16	D二聚体	70	ng/ml	0-115	M	2014-08-26 13:20:52	*葡萄糖	5.1	mmol/l	3.89-6.11	M	2014-08-26 13:20:16	C反应蛋白	0.63	mg/l	0-8	M	2014-08-26 14:04:39	凝血酶原时间(PT)	15.1	S	42992	H	2014-08-26 13:20:52
732	1000207676001	凝血酶原国际比值	1.16		0.7-1.3	M	2014-08-27 09:23:08	低密度脂蛋白	1.49	mmol/l	健康人群:1.8-3.36;心脑血管疾病危险人群:<2.59	M	2014-08-27 09:22:41	部分凝血活酶时间	32.1	S	22-45	M	2014-08-27 09:23:08	*总胆固醇	3.48	mmol/l	3.6-5.17	L	2014-08-27 09:22:41	D二聚体	120	ng/ml	0-115	H	2014-08-27 10:57:48	*葡萄糖	8.05	mmol/l	3.89-6.11	H	2014-08-27 09:22:41	C反应蛋白	6.72	mg/l	0-8	M	2014-08-27 09:22:41	凝血酶原时间(PT)	13.4	S	42992	M	2014-08-27 09:23:08
733	1000207689001	凝血酶原国际比值	1.24		0.7-1.3	M	2014-08-26 13:24:48	低密度脂蛋白	3.21	mmol/l	健康人群:1.8-3.36;心脑血管疾病危险人群:<2.59	M	2014-08-26 13:03:14	部分凝血活酶时间	41.2	S	22-45	M	2014-08-26 13:24:48	*总胆固醇	5.8	mmol/l	3.6-5.17	H	2014-08-26 13:03:14	D二聚体	370	ng/ml	0-115	H	2014-08-26 13:24:48	*葡萄糖	4.4	mmol/l	3.89-6.11	M	2014-08-26 13:03:14	C反应蛋白	0.5	mg/l	0-8	M	2014-08-26 13:14:40	凝血酶原时间(PT)	14.3	S	42992	H	2014-08-26 13:24:48
734	1000207704001	凝血酶原国际比值	1.15		0.7-1.3	M	2014-08-27 10:06:24	低密度脂蛋白	2.51	mmol/l	健康人群:1.8-3.36;心脑血管疾病危险人群:<2.59	M	2014-08-27 09:31:42	部分凝血活酶时间	23.5	S	22-45	M	2014-08-27 10:06:24	*总胆固醇	4.89	mmol/l	3.6-5.17	M	2014-08-27 09:31:42	D二聚体	40	ng/ml	0-115	M	2014-08-27 10:06:24	*葡萄糖	4.87	mmol/l	3.89-6.11	M	2014-08-27 09:31:42	C反应蛋白	0.5	mg/l	0-8	M	2014-08-28 08:05:10	凝血酶原时间(PT)	13.2	S	42992	M	2014-08-27 10:06:24
735	1000207729001	凝血酶原国际比值	1.02		0.7-1.3	M	2014-08-27 10:12:50	低密度脂蛋白	2.66	mmol/l	健康人群:1.8-3.36;心脑血管疾病危险人群:<2.59	M	2014-08-27 09:25:21	部分凝血活酶时间	44.3	S	22-45	M	2014-08-27 10:12:50	*总胆固醇	5.81	mmol/l	3.6-5.17	H	2014-08-27 09:25:21	D二聚体	120	ng/ml	0-115	H	2014-08-27 11:00:16	*葡萄糖	4.68	mmol/l	3.89-6.11	M	2014-08-27 09:25:21	C反应蛋白	2.77	mg/l	0-8	M	2014-08-27 09:27:17	凝血酶原时间(PT)	11.7	S	42992	M	2014-08-27 10:12:50
736	1000207729002	凝血酶原国际比值	0.91		0.7-1.3	M	2015-06-17 10:23:49	低密度脂蛋白	2.55	mmol/l	健康人群:1.8-3.36;心脑血管疾病危险人群:<2.59	M	2015-06-17 09:35:50	部分凝血活酶时间	28.8	S	22-45	M	2015-06-17 10:23:49	*总胆固醇	5.44	mmol/l	3.6-5.17	H	2015-06-17 09:35:50	D二聚体	2640	ng/ml	0-115	H	2015-06-17 10:23:49	*葡萄糖	4.61	mmol/l	3.89-6.11	M	2015-06-17 09:35:50	C反应蛋白	1.08	mg/l	0-8	M	2015-06-17 11:08:30	凝血酶原时间(PT)	10.4	S	42992	M	2015-06-17 10:23:49
737	1000207744001	凝血酶原国际比值	1.08		0.7-1.3	M	2014-08-27 10:22:36	低密度脂蛋白	3.47	mmol/l	健康人群:1.8-3.36;心脑血管疾病危险人群:<2.59	M	2014-08-27 08:58:15	部分凝血活酶时间	36.1	S	22-45	M	2014-08-27 10:22:36	*总胆固醇	6.62	mmol/l	3.6-5.17	H	2014-08-27 08:58:15	D二聚体	8420	ng/ml	0-115	H	2014-08-27 10:22:36	*葡萄糖	6.18	mmol/l	3.89-6.11	H	2014-08-27 08:58:15	C反应蛋白	20.2	mg/l	0-8	H	2014-08-28 07:42:22	凝血酶原时间(PT)	12.4	S	42992	M	2014-08-27 10:22:36
738	1000207745001	凝血酶原国际比值	1.24		0.7-1.3	M	2014-08-27 10:33:22	低密度脂蛋白	1.44	mmol/l	健康人群:1.8-3.36;心脑血管疾病危险人群:<2.59	M	2014-08-27 09:59:11	部分凝血活酶时间	48	S	22-45	H	2014-08-27 11:01:35	*总胆固醇	3.27	mmol/l	3.6-5.17	L	2014-08-27 09:59:11	D二聚体	310	ng/ml	0-115	H	2014-08-27 11:01:45	*葡萄糖	4.29	mmol/l	3.89-6.11	M	2014-08-27 09:59:11	C反应蛋白	2.06	mg/l	0-8	M	2014-09-02 11:48:33	凝血酶原时间(PT)	14.3	S	42992	H	2014-08-27 10:33:22
739	1000207746001	凝血酶原国际比值	1.05		0.7-1.3	M	2014-09-23 09:38:49	低密度脂蛋白	1.5	mmol/l	健康人群:1.8-3.36;心脑血管疾病危险人群:<2.59	M	2014-09-23 08:44:16	部分凝血活酶时间	21.8	S	22-45	L	2014-09-23 09:38:49	*总胆固醇	3.07	mmol/l	3.6-5.17	L	2014-09-23 08:44:16	D二聚体	760	ng/ml	0-115	H	2014-09-23 09:38:49	*葡萄糖	4.94	mmol/l	3.89-6.11	M	2014-09-23 08:44:16	C反应蛋白	203.59	mg/l	0-8	H	2014-10-03 09:22:00	凝血酶原时间(PT)	12.1	S	42992	M	2014-09-23 09:38:49
740	1000207747001	凝血酶原国际比值	0.84		0.7-1.3	M	2014-08-27 09:55:46	低密度脂蛋白	1.54	mmol/l	健康人群:1.8-3.36;心脑血管疾病危险人群:<2.59	M	2014-08-27 09:27:20	部分凝血活酶时间	27.6	S	22-45	M	2014-08-27 09:51:49	*总胆固醇	3.49	mmol/l	3.6-5.17	L	2014-08-27 09:27:20	D二聚体	1468	ng/ml	0-115	H	2014-08-27 09:33:49	*葡萄糖	4.71	mmol/l	3.89-6.11	M	2014-08-27 09:27:20	C反应蛋白	21.73	mg/l	0-8	H	2014-08-27 09:27:20	凝血酶原时间(PT)	11.2	S	43023	M	2014-08-27 09:55:46
741	1000207749002	凝血酶原国际比值	0.78		0.7-1.3	M	2015-10-31 11:26:42	低密度脂蛋白	2.54	mmol/l	健康人群:1.8-3.36;心脑血管疾病危险人群:<2.59	M	2015-10-31 09:51:54	部分凝血活酶时间	27.3	S	22-45	M	2015-10-31 11:26:42	*总胆固醇	4.5	mmol/l	3.6-5.17	M	2015-10-31 09:51:54	D二聚体	70	ng/ml	0-115	M	2015-10-31 11:26:42	*葡萄糖	5.23	mmol/l	3.89-6.11	M	2015-10-31 09:51:54	C反应蛋白	3.13	mg/l	0-8	M	2015-10-31 09:51:54	凝血酶原时间(PT)	9	S	42992	M	2015-10-31 11:26:42
742	1000207778001	凝血酶原国际比值	1.02		0.7-1.3	M	2014-08-28 09:40:55	低密度脂蛋白	3.02	mmol/l	健康人群:1.8-3.36;心脑血管疾病危险人群:<2.59	M	2014-08-28 08:46:19	部分凝血活酶时间	21.4	S	22-45	L	2014-08-28 09:40:55	*总胆固醇	5.47	mmol/l	3.6-5.17	H	2014-08-28 08:46:19	D二聚体	150	ng/ml	0-115	H	2014-08-28 09:40:55	*葡萄糖	5.09	mmol/l	3.89-6.11	M	2014-08-28 08:46:19	C反应蛋白	2.2	mg/l	0-8	M	2014-08-28 08:55:16	凝血酶原时间(PT)	11.7	S	42992	M	2014-08-28 09:40:55
743	1000207790001	凝血酶原国际比值	0.92		0.7-1.3	M	2014-08-28 09:55:25	低密度脂蛋白	3.47	mmol/l	健康人群:1.8-3.36;心脑血管疾病危险人群:<2.59	M	2014-08-28 09:14:44	部分凝血活酶时间	31.9	S	22-45	M	2014-08-28 09:49:38	*总胆固醇	6.31	mmol/l	3.6-5.17	H	2014-08-28 09:14:44	D二聚体	583	ng/ml	0-115	H	2014-08-28 09:09:42	*葡萄糖	4.85	mmol/l	3.89-6.11	M	2014-08-28 09:14:44	C反应蛋白	26.51	mg/l	0-8	H	2014-09-05 08:55:42	凝血酶原时间(PT)	12.2	S	43023	M	2014-08-28 09:55:25
744	1000207793001	凝血酶原国际比值	0.88		0.7-1.3	M	2014-08-28 09:53:14	低密度脂蛋白	2.01	mmol/l	健康人群:1.8-3.36;心脑血管疾病危险人群:<2.59	M	2014-08-28 08:57:02	部分凝血活酶时间	34.6	S	22-45	M	2014-08-28 09:49:32	*总胆固醇	3.7	mmol/l	3.6-5.17	M	2014-08-28 08:57:02	D二聚体	112	ng/ml	0-115	M	2014-08-28 09:00:55	*葡萄糖	4.96	mmol/l	3.89-6.11	M	2014-08-28 08:57:02	C反应蛋白	47.39	mg/l	0-8	H	2014-09-03 09:08:15	凝血酶原时间(PT)	11.7	S	43023	M	2014-08-28 09:53:14
745	1000207811001	凝血酶原国际比值	0.94		0.7-1.3	M	2014-08-28 09:55:35	低密度脂蛋白	2.57	mmol/l	健康人群:1.8-3.36;心脑血管疾病危险人群:<2.59	M	2014-08-28 10:12:48	部分凝血活酶时间	23.7	S	22-45	M	2014-08-28 09:57:01	*总胆固醇	4.52	mmol/l	3.6-5.17	M	2014-08-28 10:12:48	D二聚体	50	ng/ml	0-115	M	2014-08-28 09:43:35	*葡萄糖	4.85	mmol/l	3.89-6.11	M	2014-08-28 10:12:48	C反应蛋白	59.67	mg/l	0-8	H	2014-09-08 09:22:30	凝血酶原时间(PT)	12.4	S	43023	M	2014-08-28 09:55:35
746	1000207842001	凝血酶原国际比值	0.91		0.7-1.3	M	2014-08-28 10:14:07	低密度脂蛋白	2.35	mmol/l	健康人群:1.8-3.36;心脑血管疾病危险人群:<2.59	M	2014-08-28 10:15:38	部分凝血活酶时间	26.2	S	22-45	M	2014-08-28 10:14:07	*总胆固醇	4.43	mmol/l	3.6-5.17	M	2014-08-28 10:15:38	D二聚体	40	ng/ml	0-115	M	2014-08-28 10:14:07	*葡萄糖	4.89	mmol/l	3.89-6.11	M	2014-08-28 10:15:38	C反应蛋白	1.92	mg/l	0-8	M	2014-08-28 10:15:38	凝血酶原时间(PT)	10.4	S	42992	M	2014-08-28 10:14:07
747	1000207878001	凝血酶原国际比值	1.09		0.7-1.3	M	2014-09-12 07:28:47	低密度脂蛋白	1.61	mmol/l	健康人群:1.8-3.36;心脑血管疾病危险人群:<2.59	M	2014-08-29 07:18:34	部分凝血活酶时间	28.8	S	22-45	M	2014-09-12 07:28:47	*总胆固醇	3.4	mmol/l	3.6-5.17	L	2014-08-29 07:18:34	D二聚体	1180	ng/ml	0-115	H	2014-09-12 07:28:47	*葡萄糖	9.7	mmol/l	3.89-6.11	H	2014-08-29 07:18:34	C反应蛋白	94.2	mg/l	0-8	H	2014-09-16 07:52:25	凝血酶原时间(PT)	12.5	S	42992	M	2014-09-12 07:28:47
748	1000207892001	凝血酶原国际比值	0.94		0.7-1.3	M	2014-08-29 10:24:44	低密度脂蛋白	2.36	mmol/l	健康人群:1.8-3.36;心脑血管疾病危险人群:<2.59	M	2014-08-29 09:24:21	部分凝血活酶时间	21.4	S	22-45	L	2014-08-29 11:14:09	*总胆固醇	4.95	mmol/l	3.6-5.17	M	2014-08-29 09:24:21	D二聚体	120	ng/ml	0-115	H	2014-08-29 11:14:12	*葡萄糖	4.79	mmol/l	3.89-6.11	M	2014-08-29 09:24:21	C反应蛋白	5.88	mg/l	0-8	M	2014-09-05 11:15:18	凝血酶原时间(PT)	10.8	S	42992	M	2014-08-29 10:24:44
749	1000207908001	凝血酶原国际比值	0.91		0.7-1.3	M	2014-08-29 10:28:20	低密度脂蛋白	1.83	mmol/l	健康人群:1.8-3.36;心脑血管疾病危险人群:<2.59	M	2014-08-29 09:27:39	部分凝血活酶时间	22.6	S	22-45	M	2014-08-29 10:28:20	*总胆固醇	3.9	mmol/l	3.6-5.17	M	2014-08-29 09:27:39	D二聚体	110	ng/ml	0-115	M	2014-08-29 10:28:20	*葡萄糖	6.43	mmol/l	3.89-6.11	H	2014-08-29 09:27:39	C反应蛋白	1.73	mg/l	0-8	M	2014-08-29 10:00:39	凝血酶原时间(PT)	10.4	S	42992	M	2014-08-29 10:28:20
750	1000207913001	凝血酶原国际比值	1.01		0.7-1.3	M	2014-08-29 09:54:00	低密度脂蛋白	2.48	mmol/l	健康人群:1.8-3.36;心脑血管疾病危险人群:<2.59	M	2014-08-29 09:24:32	部分凝血活酶时间	32.1	S	22-45	M	2014-08-29 09:54:00	*总胆固醇	4.53	mmol/l	3.6-5.17	M	2014-08-29 09:24:32	D二聚体	40	ng/ml	0-115	M	2014-08-29 09:54:00	*葡萄糖	4.91	mmol/l	3.89-6.11	M	2014-08-29 09:24:32	C反应蛋白	1.1	mg/l	0-8	M	2014-08-29 09:24:32	凝血酶原时间(PT)	11.6	S	42992	M	2014-08-29 09:54:00
751	1000207923001	凝血酶原国际比值	0.9		0.7-1.3	M	2014-08-29 11:18:57	低密度脂蛋白	3.1	mmol/l	健康人群:1.8-3.36;心脑血管疾病危险人群:<2.59	M	2014-08-29 09:14:21	部分凝血活酶时间	22.9	S	22-45	M	2014-08-29 11:42:34	*总胆固醇	5.39	mmol/l	3.6-5.17	H	2014-08-29 09:14:21	D二聚体	150	ng/ml	0-115	H	2014-08-29 11:18:57	*葡萄糖	7.33	mmol/l	3.89-6.11	H	2014-08-29 09:14:21	C反应蛋白	1.52	mg/l	0-8	M	2014-08-29 09:14:21	凝血酶原时间(PT)	10.3	S	42992	M	2014-08-29 11:18:57
752	1000207940001	凝血酶原国际比值	0.92		0.7-1.3	M	2014-08-29 09:37:18	低密度脂蛋白	2.64	mmol/l	健康人群:1.8-3.36;心脑血管疾病危险人群:<2.59	M	2014-08-29 08:46:36	部分凝血活酶时间	27.3	S	22-45	M	2014-08-29 09:37:18	*总胆固醇	5	mmol/l	3.6-5.17	M	2014-08-29 08:46:36	D二聚体	40	ng/ml	0-115	M	2014-08-29 09:37:18	*葡萄糖	4.59	mmol/l	3.89-6.11	M	2014-08-29 08:46:36	C反应蛋白	1.75	mg/l	0-8	M	2014-08-29 08:46:36	凝血酶原时间(PT)	10.6	S	42992	M	2014-08-29 09:37:18
753	1000207948001	凝血酶原国际比值	1.01		0.7-1.3	M	2014-08-29 10:28:40	低密度脂蛋白	2.61	mmol/l	健康人群:1.8-3.36;心脑血管疾病危险人群:<2.59	M	2014-08-29 09:24:39	部分凝血活酶时间	23.5	S	22-45	M	2014-08-29 10:28:40	*总胆固醇	4.74	mmol/l	3.6-5.17	M	2014-08-29 09:24:39	D二聚体	80	ng/ml	0-115	M	2014-08-29 10:28:40	*葡萄糖	5.74	mmol/l	3.89-6.11	M	2014-08-29 09:24:39	C反应蛋白	1.78	mg/l	0-8	M	2014-09-01 09:26:12	凝血酶原时间(PT)	11.6	S	42992	M	2014-08-29 10:28:40
754	1000207980001	凝血酶原国际比值	0.87		0.7-1.3	M	2014-08-29 16:37:52	低密度脂蛋白	2.54	mmol/l	健康人群:1.8-3.36;心脑血管疾病危险人群:<2.59	M	2014-08-29 16:34:44	部分凝血活酶时间	36.5	S	22-45	M	2014-08-29 16:24:45	*总胆固醇	5.7	mmol/l	3.6-5.17	H	2014-08-29 16:34:44	D二聚体	57	ng/ml	0-115	M	2014-08-29 16:42:57	*葡萄糖	5.1	mmol/l	3.89-6.11	M	2014-08-29 16:34:44	C反应蛋白	1.77	mg/l	0-8	M	2014-09-01 11:22:05	凝血酶原时间(PT)	11.6	S	43023	M	2014-08-29 16:37:52
755	1000207982001	凝血酶原国际比值	1.01		0.7-1.3	M	2014-08-30 10:25:08	低密度脂蛋白	2.96	mmol/l	健康人群:1.8-3.36;心脑血管疾病危险人群:<2.59	M	2014-08-30 09:32:09	部分凝血活酶时间	25	S	22-45	M	2014-08-30 10:25:08	*总胆固醇	5.73	mmol/l	3.6-5.17	H	2014-08-30 09:32:09	D二聚体	160	ng/ml	0-115	H	2014-08-30 10:25:08	*葡萄糖	5.58	mmol/l	3.89-6.11	M	2014-08-30 09:32:09	C反应蛋白	3.35	mg/l	0-8	M	2014-08-30 09:32:09	凝血酶原时间(PT)	11.6	S	42992	M	2014-08-30 10:25:08
756	1000207994001	凝血酶原国际比值	0.99		0.7-1.3	M	2014-08-30 11:25:57	低密度脂蛋白	2.07	mmol/l	健康人群:1.8-3.36;心脑血管疾病危险人群:<2.59	M	2014-08-30 10:06:36	部分凝血活酶时间	27.6	S	22-45	M	2014-08-30 11:25:57	*总胆固醇	3.83	mmol/l	3.6-5.17	M	2014-08-30 10:06:36	D二聚体	60	ng/ml	0-115	M	2014-08-30 11:25:57	*葡萄糖	4.78	mmol/l	3.89-6.11	M	2014-08-30 10:06:36	C反应蛋白	6.86	mg/l	0-8	M	2014-08-30 10:06:36	凝血酶原时间(PT)	11.4	S	42992	M	2014-08-30 11:25:57
757	1000207995001	凝血酶原国际比值	1.09		0.7-1.3	M	2014-08-29 11:22:31	低密度脂蛋白	3.5	mmol/l	健康人群:1.8-3.36;心脑血管疾病危险人群:<2.59	M	2014-08-29 10:48:28	部分凝血活酶时间	34.1	S	22-45	M	2014-08-29 11:20:20	*总胆固醇	5.61	mmol/l	3.6-5.17	H	2014-08-29 10:48:28	D二聚体	35	ng/ml	0-115	M	2014-08-29 11:09:02	*葡萄糖	5.62	mmol/l	3.89-6.11	M	2014-08-29 10:48:28	C反应蛋白	2.98	mg/l	0-8	M	2014-08-29 10:48:28	凝血酶原时间(PT)	14.1	S	43023	M	2014-08-29 11:22:31
758	1000208039001	凝血酶原国际比值	1.08		0.7-1.3	M	2014-09-09 09:39:58	低密度脂蛋白	2.37	mmol/l	健康人群:1.8-3.36;心脑血管疾病危险人群:<2.59	M	2014-09-09 09:32:30	部分凝血活酶时间	22.4	S	22-45	M	2014-09-09 10:57:23	*总胆固醇	4.35	mmol/l	3.6-5.17	M	2014-09-09 09:32:30	D二聚体	370	ng/ml	0-115	H	2014-09-09 09:39:58	*葡萄糖	4.69	mmol/l	3.89-6.11	M	2014-09-09 09:32:30	C反应蛋白	7.92	mg/l	0-8	M	2014-09-09 09:32:30	凝血酶原时间(PT)	12.4	S	42992	M	2014-09-09 09:39:58
759	1000208076001	凝血酶原国际比值	0.93		0.7-1.3	M	2014-08-30 11:44:53	低密度脂蛋白	2.68	mmol/l	健康人群:1.8-3.36;心脑血管疾病危险人群:<2.59	M	2014-08-30 12:46:25	部分凝血活酶时间	30	S	22-45	M	2014-08-30 11:44:53	*总胆固醇	4.9	mmol/l	3.6-5.17	M	2014-08-30 12:46:25	D二聚体	3071	ng/ml	0-115	H	2014-08-30 11:47:08	*葡萄糖	5.4	mmol/l	3.89-6.11	M	2014-08-30 12:46:25	C反应蛋白	72.1	mg/l	0-8	H	2014-08-30 12:46:25	凝血酶原时间(PT)	12.3	S	43023	M	2014-08-30 11:44:53
760	1000208091001	凝血酶原国际比值	1.1		0.7-1.3	M	2014-08-31 09:35:47	低密度脂蛋白	1.93	mmol/l	健康人群:1.8-3.36;心脑血管疾病危险人群:<2.59	M	2014-08-31 09:31:39	部分凝血活酶时间	26.7	S	22-45	M	2014-08-31 09:35:47	*总胆固醇	4.2	mmol/l	3.6-5.17	M	2014-08-31 09:31:39	D二聚体	2010	ng/ml	0-115	H	2014-08-31 09:35:47	*葡萄糖	6.3	mmol/l	3.89-6.11	H	2014-08-31 09:31:39	C反应蛋白	111.7	mg/l	0-8	H	2014-08-31 09:31:39	凝血酶原时间(PT)	12.7	S	42992	M	2014-08-31 09:35:47
761	1000208099001	凝血酶原国际比值	1.09		0.7-1.3	M	2014-08-31 08:55:49	低密度脂蛋白	2.09	mmol/l	健康人群:1.8-3.36;心脑血管疾病危险人群:<2.59	M	2014-08-31 09:34:58	部分凝血活酶时间	25.5	S	22-45	M	2014-08-31 08:55:49	*总胆固醇	4.4	mmol/l	3.6-5.17	M	2014-08-31 09:34:58	D二聚体	6460	ng/ml	0-115	H	2014-08-31 10:11:22	*葡萄糖	6.5	mmol/l	3.89-6.11	H	2014-08-31 09:34:58	C反应蛋白	99.6	mg/l	0-8	H	2014-09-14 09:43:08	凝血酶原时间(PT)	12.5	S	42992	M	2014-08-31 08:55:49
762	1000208124001	凝血酶原国际比值	1.07		0.7-1.3	M	2014-08-31 08:58:15	低密度脂蛋白	2.89	mmol/l	健康人群:1.8-3.36;心脑血管疾病危险人群:<2.59	M	2014-08-31 09:37:35	部分凝血活酶时间	35.2	S	22-45	M	2014-08-31 08:58:15	*总胆固醇	5.1	mmol/l	3.6-5.17	M	2014-08-31 09:37:35	D二聚体	640	ng/ml	0-115	H	2014-08-31 08:58:15	*葡萄糖	4.8	mmol/l	3.89-6.11	M	2014-08-31 09:37:35	C反应蛋白	5.4	mg/l	0-8	M	2014-08-31 09:06:11	凝血酶原时间(PT)	12.3	S	42992	M	2014-08-31 08:58:15
763	1000208176003	凝血酶原国际比值	0.89		0.7-1.3	M	2016-08-16 12:45:28	低密度脂蛋白	3.38	mmol/l	健康人群:1.8-3.36;心脑血管疾病危险人群:<2.59	M	2016-08-16 12:12:20	部分凝血活酶时间	24.6	S	20-40	M	2016-08-16 12:45:28	*总胆固醇	5.89	mmol/l	3.6-5.17	H	2016-08-16 12:12:20	D二聚体	190	ng/ml	0-115	H	2016-08-16 12:45:28	*葡萄糖	7.08	mmol/l	3.89-6.11	H	2016-08-16 12:12:20	C反应蛋白	0.66	mg/l	0-8	M	2016-08-16 12:12:20	凝血酶原时间(PT)	10.3	S	42992	M	2016-08-16 12:45:28
764	1000208186001	凝血酶原国际比值	0.97		0.7-1.3	M	2014-09-01 10:00:42	低密度脂蛋白	2.08	mmol/l	健康人群:1.8-3.36;心脑血管疾病危险人群:<2.59	M	2014-09-01 08:48:20	部分凝血活酶时间	26.1	S	22-45	M	2014-09-01 10:00:42	*总胆固醇	3.65	mmol/l	3.6-5.17	M	2014-09-01 08:48:20	D二聚体	590	ng/ml	0-115	H	2014-09-01 10:00:42	*葡萄糖	5.65	mmol/l	3.89-6.11	M	2014-09-01 08:48:20	C反应蛋白	96	mg/l	0-8	H	2014-09-05 15:27:04	凝血酶原时间(PT)	11.1	S	42992	M	2014-09-01 10:00:42
765	1000208214001	凝血酶原国际比值	0.89		0.7-1.3	M	2014-09-01 10:02:57	低密度脂蛋白	3.35	mmol/l	健康人群:1.8-3.36;心脑血管疾病危险人群:<2.59	M	2014-09-01 09:26:48	部分凝血活酶时间	28.2	S	22-45	M	2014-09-01 09:59:10	*总胆固醇	5.55	mmol/l	3.6-5.17	H	2014-09-01 09:26:48	D二聚体	2489	ng/ml	0-115	H	2014-09-01 09:36:38	*葡萄糖	15.29	mmol/l	3.89-6.11	H	2014-09-01 09:26:48	C反应蛋白	9.45	mg/l	0-8	H	2014-09-01 09:26:48	凝血酶原时间(PT)	11.8	S	43023	M	2014-09-01 10:02:57
766	1000208220001	凝血酶原国际比值	0.95		0.7-1.3	M	2014-09-02 09:21:11	低密度脂蛋白	1.83	mmol/l	健康人群:1.8-3.36;心脑血管疾病危险人群:<2.59	M	2014-09-02 09:42:37	部分凝血活酶时间	21	S	22-45	L	2014-09-02 11:08:20	*总胆固醇	3.92	mmol/l	3.6-5.17	M	2014-09-02 09:42:37	D二聚体	120	ng/ml	0-115	H	2014-09-02 11:08:23	*葡萄糖	4.84	mmol/l	3.89-6.11	M	2014-09-02 09:42:37	C反应蛋白	1.26	mg/l	0-8	M	2014-09-02 09:42:37	凝血酶原时间(PT)	10.9	S	42992	M	2014-09-02 09:21:11
767	1000208255001	凝血酶原国际比值	0.88		0.7-1.3	M	2014-09-01 13:38:08	低密度脂蛋白	3.53	mmol/l	健康人群:1.8-3.36;心脑血管疾病危险人群:<2.59	M	2014-09-01 12:57:26	部分凝血活酶时间	22.5	S	22-45	M	2014-09-01 13:38:08	*总胆固醇	6.2	mmol/l	3.6-5.17	H	2014-09-01 12:57:26	D二聚体	140	ng/ml	0-115	H	2014-09-01 13:38:08	*葡萄糖	4.3	mmol/l	3.89-6.11	M	2014-09-01 12:57:26	C反应蛋白	2.1	mg/l	0-8	M	2014-09-01 12:57:26	凝血酶原时间(PT)	10.1	S	42992	M	2014-09-01 13:38:08
768	1000208256001	凝血酶原国际比值	0.98		0.7-1.3	M	2014-09-02 10:12:19	低密度脂蛋白	2.17	mmol/l	健康人群:1.8-3.36;心脑血管疾病危险人群:<2.59	M	2014-09-02 09:21:19	部分凝血活酶时间	35.1	S	22-45	M	2014-09-02 10:08:27	*总胆固醇	4.99	mmol/l	3.6-5.17	M	2014-09-02 09:21:19	D二聚体	4881	ng/ml	0-115	H	2014-09-02 09:21:07	*葡萄糖	8.08	mmol/l	3.89-6.11	H	2014-09-02 09:21:19	C反应蛋白	57.57	mg/l	0-8	H	2014-09-02 09:21:19	凝血酶原时间(PT)	12.9	S	43023	M	2014-09-02 10:12:19
769	1000208269002	凝血酶原国际比值	0.97		0.7-1.3	M	2014-09-02 12:25:20	低密度脂蛋白	3.26	mmol/l	健康人群:1.8-3.36;心脑血管疾病危险人群:<2.59	M	2014-09-02 09:14:55	部分凝血活酶时间	25.5	S	22-45	M	2014-09-02 12:25:20	*总胆固醇	5.42	mmol/l	3.6-5.17	H	2014-09-02 09:14:55	D二聚体	40	ng/ml	0-115	M	2014-09-02 12:25:20	*葡萄糖	5.13	mmol/l	3.89-6.11	M	2014-09-02 09:14:55	C反应蛋白	1.81	mg/l	0-8	M	2014-09-02 09:14:55	凝血酶原时间(PT)	11.2	S	42992	M	2014-09-02 12:25:20
770	1000208272001	凝血酶原国际比值	0.85		0.7-1.3	M	2014-09-02 10:19:43	低密度脂蛋白	2.79	mmol/l	健康人群:1.8-3.36;心脑血管疾病危险人群:<2.59	M	2014-09-02 09:34:20	部分凝血活酶时间	31	S	22-45	M	2014-09-02 10:15:56	*总胆固醇	5.76	mmol/l	3.6-5.17	H	2014-09-02 09:34:20	D二聚体	117	ng/ml	0-115	H	2014-09-02 11:16:46	*葡萄糖	4.43	mmol/l	3.89-6.11	M	2014-09-02 09:34:20	C反应蛋白	12.62	mg/l	0-8	H	2014-09-10 11:13:47	凝血酶原时间(PT)	11.4	S	43023	M	2014-09-02 10:19:43
771	1000208279001	凝血酶原国际比值	1.07		0.7-1.3	M	2014-09-02 09:39:01	低密度脂蛋白	1.88	mmol/l	健康人群:1.8-3.36;心脑血管疾病危险人群:<2.59	M	2014-09-02 09:18:36	部分凝血活酶时间	30.7	S	22-45	M	2014-09-02 09:39:01	*总胆固醇	3.71	mmol/l	3.6-5.17	M	2014-09-02 09:18:36	D二聚体	100	ng/ml	0-115	M	2014-09-02 11:24:09	*葡萄糖	4.23	mmol/l	3.89-6.11	M	2014-09-02 09:18:36	C反应蛋白	6.32	mg/l	0-8	M	2014-09-02 09:17:30	凝血酶原时间(PT)	12.3	S	42992	M	2014-09-02 09:39:01
772	1000208282001	凝血酶原国际比值	0.96		0.7-1.3	M	2014-09-05 10:22:43	低密度脂蛋白	2.54	mmol/l	健康人群:1.8-3.36;心脑血管疾病危险人群:<2.59	M	2014-09-05 09:10:13	部分凝血活酶时间	25.4	S	22-45	M	2014-09-05 10:22:43	*总胆固醇	4.6	mmol/l	3.6-5.17	M	2014-09-05 09:10:13	D二聚体	60	ng/ml	0-115	M	2014-09-05 10:22:43	*葡萄糖	4.77	mmol/l	3.89-6.11	M	2014-09-05 09:10:13	C反应蛋白	1.52	mg/l	0-8	M	2014-09-05 09:10:13	凝血酶原时间(PT)	11	S	42992	M	2014-09-05 10:22:43
773	1000208284001	凝血酶原国际比值	0.94		0.7-1.3	M	2014-09-02 09:32:40	低密度脂蛋白	2.75	mmol/l	健康人群:1.8-3.36;心脑血管疾病危险人群:<2.59	M	2014-09-02 09:51:19	部分凝血活酶时间	22.6	S	22-45	M	2014-09-02 11:08:53	*总胆固醇	4.71	mmol/l	3.6-5.17	M	2014-09-02 09:51:19	D二聚体	110	ng/ml	0-115	M	2014-09-02 11:08:56	*葡萄糖	5.07	mmol/l	3.89-6.11	M	2014-09-02 09:51:19	C反应蛋白	2.29	mg/l	0-8	M	2014-09-02 09:15:49	凝血酶原时间(PT)	10.8	S	42992	M	2014-09-02 09:32:40
774	1000208296001	凝血酶原国际比值	1.06		0.7-1.3	M	2014-09-02 09:14:45	低密度脂蛋白	3.88	mmol/l	健康人群:1.8-3.36;心脑血管疾病危险人群:<2.59	M	2014-09-02 09:33:52	部分凝血活酶时间	29.2	S	22-45	M	2014-09-02 09:14:45	*总胆固醇	6.77	mmol/l	3.6-5.17	H	2014-09-02 09:33:52	D二聚体	110	ng/ml	0-115	M	2014-09-02 09:14:45	*葡萄糖	5.45	mmol/l	3.89-6.11	M	2014-09-02 09:33:52	C反应蛋白	2.26	mg/l	0-8	M	2014-09-02 09:33:52	凝血酶原时间(PT)	12.2	S	42992	M	2014-09-02 09:14:45
775	1000208301001	凝血酶原国际比值	1.03		0.7-1.3	M	2014-09-02 09:10:19	低密度脂蛋白	2.8	mmol/l	健康人群:1.8-3.36;心脑血管疾病危险人群:<2.59	M	2014-09-02 09:09:39	部分凝血活酶时间	22.2	S	22-45	M	2014-09-02 11:07:39	*总胆固醇	5.05	mmol/l	3.6-5.17	M	2014-09-02 09:09:39	D二聚体	420	ng/ml	0-115	H	2014-09-02 09:10:19	*葡萄糖	7.51	mmol/l	3.89-6.11	H	2014-09-02 09:09:39	C反应蛋白	50.16	mg/l	0-8	H	2014-09-02 09:09:39	凝血酶原时间(PT)	11.9	S	42992	M	2014-09-02 09:10:19
776	1000208319002	凝血酶原国际比值	1		0.7-1.3	M	2014-12-29 09:58:02	低密度脂蛋白	3.03	mmol/l	健康人群:1.8-3.36;心脑血管疾病危险人群:<2.59	M	2014-12-29 09:19:38	部分凝血活酶时间	25.7	S	22-45	M	2014-12-29 09:58:02	*总胆固醇	4.68	mmol/l	3.6-5.17	M	2014-12-29 09:19:38	D二聚体	200	ng/ml	0-115	H	2014-12-29 09:58:02	*葡萄糖	5.84	mmol/l	3.89-6.11	M	2014-12-29 09:19:38	C反应蛋白	7.33	mg/l	0-8	M	2014-12-30 09:43:41	凝血酶原时间(PT)	11.5	S	42992	M	2014-12-29 09:58:02
777	1000208320001	凝血酶原国际比值	1.03		0.7-1.3	M	2014-09-02 12:41:44	低密度脂蛋白	2.37	mmol/l	健康人群:1.8-3.36;心脑血管疾病危险人群:<2.59	M	2014-09-02 10:54:39	部分凝血活酶时间	21.3	S	22-45	L	2014-09-02 12:41:44	*总胆固醇	4.34	mmol/l	3.6-5.17	M	2014-09-02 10:54:39	D二聚体	580	ng/ml	0-115	H	2014-09-02 12:25:25	*葡萄糖	11.95	mmol/l	3.89-6.11	H	2014-09-02 10:54:39	C反应蛋白	5.17	mg/l	0-8	M	2014-09-09 09:22:33	凝血酶原时间(PT)	11.9	S	42992	M	2014-09-02 12:41:44
778	1000208340001	凝血酶原国际比值	0.99		0.7-1.3	M	2014-09-02 12:51:16	低密度脂蛋白	2.43	mmol/l	健康人群:1.8-3.36;心脑血管疾病危险人群:<2.59	M	2014-09-02 10:54:31	部分凝血活酶时间	20	S	22-45	L	2014-09-02 12:25:42	*总胆固醇	4.87	mmol/l	3.6-5.17	M	2014-09-02 10:54:31	D二聚体	330	ng/ml	0-115	H	2014-09-02 12:25:42	*葡萄糖	5.34	mmol/l	3.89-6.11	M	2014-09-02 10:54:31	C反应蛋白	5.55	mg/l	0-8	M	2014-09-02 10:54:31	凝血酶原时间(PT)	11.4	S	42992	M	2014-09-02 12:51:16
779	1000208351001	凝血酶原国际比值	1.31		0.7-1.3	H	2014-09-03 09:42:05	低密度脂蛋白	2.17	mmol/l	健康人群:1.8-3.36;心脑血管疾病危险人群:<2.59	M	2014-09-03 08:56:38	部分凝血活酶时间	35.9	S	22-45	M	2014-09-03 09:42:05	*总胆固醇	3.89	mmol/l	3.6-5.17	M	2014-09-03 08:56:38	D二聚体	3780	ng/ml	0-115	H	2014-09-03 09:42:05	*葡萄糖	5.17	mmol/l	3.89-6.11	M	2014-09-03 08:56:38	C反应蛋白	88.64	mg/l	0-8	H	2014-09-03 08:56:37	凝血酶原时间(PT)	15.1	S	42992	H	2014-09-03 09:42:05
780	1000208361001	凝血酶原国际比值	0.95		0.7-1.3	M	2014-09-06 11:07:18	低密度脂蛋白	2.43	mmol/l	健康人群:1.8-3.36;心脑血管疾病危险人群:<2.59	M	2014-09-06 09:21:31	部分凝血活酶时间	26.7	S	22-45	M	2014-09-06 11:07:18	*总胆固醇	3.94	mmol/l	3.6-5.17	M	2014-09-06 09:21:31	D二聚体	30	ng/ml	0-115	M	2014-09-06 11:07:18	*葡萄糖	4.89	mmol/l	3.89-6.11	M	2014-09-06 09:21:31	C反应蛋白	3.45	mg/l	0-8	M	2014-09-23 08:51:05	凝血酶原时间(PT)	10.9	S	42992	M	2014-09-06 11:07:18
781	1000208401001	凝血酶原国际比值	1.1		0.7-1.3	M	2014-09-02 15:54:18	低密度脂蛋白	2.07	mmol/l	健康人群:1.8-3.36;心脑血管疾病危险人群:<2.59	M	2014-09-02 15:23:59	部分凝血活酶时间	21.2	S	22-45	L	2014-09-02 15:54:18	*总胆固醇	4.2	mmol/l	3.6-5.17	M	2014-09-02 15:23:59	D二聚体	1630	ng/ml	0-115	H	2014-09-02 15:54:18	*葡萄糖	5.2	mmol/l	3.89-6.11	M	2014-09-02 15:23:59	C反应蛋白	0.3	mg/l	0-8	M	2014-09-02 15:23:59	凝血酶原时间(PT)	12.7	S	42992	M	2014-09-02 15:54:18
782	1000208490001	凝血酶原国际比值	0.97		0.7-1.3	M	2014-09-03 09:59:30	低密度脂蛋白	2.58	mmol/l	健康人群:1.8-3.36;心脑血管疾病危险人群:<2.59	M	2014-09-03 09:05:10	部分凝血活酶时间	20.6	S	22-45	L	2014-09-03 11:10:56	*总胆固醇	4.71	mmol/l	3.6-5.17	M	2014-09-03 09:05:10	D二聚体	5860	ng/ml	0-115	H	2014-09-03 09:59:30	*葡萄糖	7.76	mmol/l	3.89-6.11	H	2014-09-03 09:05:10	C反应蛋白	2.56	mg/l	0-8	M	2014-09-08 11:03:23	凝血酶原时间(PT)	11.2	S	42992	M	2014-09-03 09:59:30
783	1000208494001	凝血酶原国际比值	1.03		0.7-1.3	M	2014-09-04 09:50:47	低密度脂蛋白	1.77	mmol/l	健康人群:1.8-3.36;心脑血管疾病危险人群:<2.59	M	2014-09-04 09:12:42	部分凝血活酶时间	22.8	S	22-45	M	2014-09-04 11:26:07	*总胆固醇	3.31	mmol/l	3.6-5.17	L	2014-09-04 09:12:42	D二聚体	110	ng/ml	0-115	M	2014-09-04 11:26:09	*葡萄糖	4.6	mmol/l	3.89-6.11	M	2014-09-04 09:12:42	C反应蛋白	2.22	mg/l	0-8	M	2014-09-13 09:28:43	凝血酶原时间(PT)	11.9	S	42992	M	2014-09-04 09:50:47
784	1000208501001	凝血酶原国际比值	1		0.7-1.3	M	2014-09-03 10:39:18	低密度脂蛋白	3.79	mmol/l	健康人群:1.8-3.36;心脑血管疾病危险人群:<2.59	M	2014-09-03 10:26:52	部分凝血活酶时间	23.4	S	22-45	M	2014-09-03 10:16:46	*总胆固醇	7.03	mmol/l	3.6-5.17	H	2014-09-03 10:26:52	D二聚体	240	ng/ml	0-115	H	2014-09-03 10:16:46	*葡萄糖	5.27	mmol/l	3.89-6.11	M	2014-09-03 10:26:52	C反应蛋白	2.92	mg/l	0-8	M	2014-09-03 10:26:52	凝血酶原时间(PT)	11.5	S	42992	M	2014-09-03 10:39:18
785	1000208502001	凝血酶原国际比值	0.9		0.7-1.3	M	2014-09-04 09:34:57	低密度脂蛋白	2.06	mmol/l	健康人群:1.8-3.36;心脑血管疾病危险人群:<2.59	M	2014-09-04 09:05:39	部分凝血活酶时间	34.9	S	22-45	M	2014-09-04 09:27:46	*总胆固醇	4.41	mmol/l	3.6-5.17	M	2014-09-04 09:05:39	D二聚体	206	ng/ml	0-115	H	2014-09-04 09:18:07	*葡萄糖	7.96	mmol/l	3.89-6.11	H	2014-09-04 09:05:39	C反应蛋白	61.04	mg/l	0-8	H	2014-09-04 09:53:24	凝血酶原时间(PT)	12	S	43023	M	2014-09-04 09:34:57
786	1000208543001	凝血酶原国际比值	0.92		0.7-1.3	M	2014-09-04 10:27:23	低密度脂蛋白	2.75	mmol/l	健康人群:1.8-3.36;心脑血管疾病危险人群:<2.59	M	2014-09-04 09:27:05	部分凝血活酶时间	34.3	S	22-45	M	2014-09-04 10:23:11	*总胆固醇	4.53	mmol/l	3.6-5.17	M	2014-09-04 09:27:05	D二聚体	109	ng/ml	0-115	M	2014-09-04 09:36:23	*葡萄糖	7.18	mmol/l	3.89-6.11	H	2014-09-04 09:27:05	C反应蛋白	8.42	mg/l	0-8	H	2014-09-04 09:27:05	凝血酶原时间(PT)	12.2	S	43023	M	2014-09-04 10:27:23
787	1000208547001	凝血酶原国际比值	0.97		0.7-1.3	M	2014-09-06 12:33:21	低密度脂蛋白	2.84	mmol/l	健康人群:1.8-3.36;心脑血管疾病危险人群:<2.59	M	2014-09-05 10:26:31	部分凝血活酶时间	23.8	S	22-45	M	2014-09-06 12:33:21	*总胆固醇	4.71	mmol/l	3.6-5.17	M	2014-09-05 10:26:31	D二聚体	220	ng/ml	0-115	H	2014-09-06 12:33:21	*葡萄糖	4.81	mmol/l	3.89-6.11	M	2014-09-05 10:26:31	C反应蛋白	39.87	mg/l	0-8	H	2014-09-05 10:22:18	凝血酶原时间(PT)	11.1	S	42992	M	2014-09-06 12:33:21
788	1000208571001	凝血酶原国际比值	1		0.7-1.3	M	2014-09-04 09:48:21	低密度脂蛋白	1.29	mmol/l	健康人群:1.8-3.36;心脑血管疾病危险人群:<2.59	M	2014-09-04 09:24:00	部分凝血活酶时间	26.8	S	22-45	M	2014-09-04 09:48:21	*总胆固醇	3.7	mmol/l	3.6-5.17	M	2014-09-04 09:24:00	D二聚体	110	ng/ml	0-115	M	2014-09-04 11:25:53	*葡萄糖	4.92	mmol/l	3.89-6.11	M	2014-09-04 09:24:00	C反应蛋白	9.37	mg/l	0-8	H	2014-09-09 09:00:03	凝血酶原时间(PT)	11.5	S	42992	M	2014-09-04 09:48:21
789	1000208575001	凝血酶原国际比值	1.24		0.7-1.3	M	2014-09-04 10:00:50	低密度脂蛋白	0.89	mmol/l	健康人群:1.8-3.36;心脑血管疾病危险人群:<2.59	M	2014-09-04 09:53:52	部分凝血活酶时间	36.1	S	22-45	M	2014-09-04 10:00:50	*总胆固醇	2.4	mmol/l	3.6-5.17	L	2014-09-04 09:53:52	D二聚体	13450	ng/ml	0-115	H	2014-09-04 10:00:50	*葡萄糖	7.07	mmol/l	3.89-6.11	H	2014-09-04 09:53:52	C反应蛋白	120.35	mg/l	0-8	H	2014-09-17 10:33:38	凝血酶原时间(PT)	14.3	S	42992	H	2014-09-04 10:00:50
790	1000208584001	凝血酶原国际比值	0.95		0.7-1.3	M	2014-09-04 10:06:27	低密度脂蛋白	3.01	mmol/l	健康人群:1.8-3.36;心脑血管疾病危险人群:<2.59	M	2014-09-04 09:33:32	部分凝血活酶时间	23.8	S	22-45	M	2014-09-04 10:06:27	*总胆固醇	5.11	mmol/l	3.6-5.17	M	2014-09-04 09:33:32	D二聚体	2180	ng/ml	0-115	H	2014-09-04 10:06:27	*葡萄糖	5.29	mmol/l	3.89-6.11	M	2014-09-04 09:33:32	C反应蛋白	7.57	mg/l	0-8	M	2014-09-04 09:33:32	凝血酶原时间(PT)	10.9	S	42992	M	2014-09-04 10:06:27
791	1000208624001	凝血酶原国际比值	0.84		0.7-1.3	M	2014-09-05 10:29:14	低密度脂蛋白	3.14	mmol/l	健康人群:1.8-3.36;心脑血管疾病危险人群:<2.59	M	2014-09-05 09:21:44	部分凝血活酶时间	21.4	S	22-45	L	2014-09-05 11:17:31	*总胆固醇	5.87	mmol/l	3.6-5.17	H	2014-09-05 09:21:44	D二聚体	100	ng/ml	0-115	M	2014-09-05 10:29:14	*葡萄糖	9.18	mmol/l	3.89-6.11	H	2014-09-05 09:21:44	C反应蛋白	2.87	mg/l	0-8	M	2014-09-05 09:21:44	凝血酶原时间(PT)	9.7	S	42992	M	2014-09-05 10:29:14
792	1000208649001	凝血酶原国际比值	0.96		0.7-1.3	M	2014-09-05 10:37:46	低密度脂蛋白	2.65	mmol/l	健康人群:1.8-3.36;心脑血管疾病危险人群:<2.59	M	2014-09-05 09:22:05	部分凝血活酶时间	22.9	S	22-45	M	2014-09-05 11:18:39	*总胆固醇	5.81	mmol/l	3.6-5.17	H	2014-09-05 09:22:05	D二聚体	20	ng/ml	0-115	M	2014-09-05 10:37:46	*葡萄糖	4.91	mmol/l	3.89-6.11	M	2014-09-05 09:22:05	C反应蛋白	3.1	mg/l	0-8	M	2014-09-05 09:22:05	凝血酶原时间(PT)	11	S	42992	M	2014-09-05 10:37:46
793	1000208653001	凝血酶原国际比值	1.02		0.7-1.3	M	2014-09-05 11:23:21	低密度脂蛋白	1.74	mmol/l	健康人群:1.8-3.36;心脑血管疾病危险人群:<2.59	M	2014-09-05 09:22:15	部分凝血活酶时间	22.5	S	22-45	M	2014-09-05 11:28:52	*总胆固醇	3.55	mmol/l	3.6-5.17	L	2014-09-05 09:22:15	D二聚体	3610	ng/ml	0-115	H	2014-09-05 11:23:21	*葡萄糖	4.65	mmol/l	3.89-6.11	M	2014-09-05 09:22:15	C反应蛋白	19.26	mg/l	0-8	H	2014-09-05 09:32:28	凝血酶原时间(PT)	11.7	S	42992	M	2014-09-05 11:23:21
794	1000208696001	凝血酶原国际比值	1.03		0.7-1.3	M	2014-09-05 10:34:30	低密度脂蛋白	1.71	mmol/l	健康人群:1.8-3.36;心脑血管疾病危险人群:<2.59	M	2014-09-05 09:27:43	部分凝血活酶时间	33.3	S	22-45	M	2014-09-05 10:34:30	*总胆固醇	3.72	mmol/l	3.6-5.17	M	2014-09-05 09:27:43	D二聚体	300	ng/ml	0-115	H	2014-09-05 10:34:30	*葡萄糖	5.33	mmol/l	3.89-6.11	M	2014-09-05 09:27:43	C反应蛋白	202.17	mg/l	0-8	H	2014-09-05 09:27:43	凝血酶原时间(PT)	11.8	S	42992	M	2014-09-05 10:34:30
795	1000208699002	凝血酶原国际比值	0.92		0.7-1.3	M	2014-11-21 09:31:44	低密度脂蛋白	3.04	mmol/l	健康人群:1.8-3.36;心脑血管疾病危险人群:<2.59	M	2014-11-21 09:13:28	部分凝血活酶时间	24.7	S	22-45	M	2014-11-21 09:31:44	*总胆固醇	5.05	mmol/l	3.6-5.17	M	2014-11-21 09:13:28	D二聚体	250	ng/ml	0-115	H	2014-11-21 09:31:44	*葡萄糖	6.74	mmol/l	3.89-6.11	H	2014-11-21 09:13:28	C反应蛋白	0.62	mg/l	0-8	M	2014-11-21 09:13:28	凝血酶原时间(PT)	10.6	S	42992	M	2014-11-21 09:31:44
796	1000208725001	凝血酶原国际比值	1.31		0.7-1.3	H	2014-09-06 09:46:15	低密度脂蛋白	1.18	mmol/l	健康人群:1.8-3.36;心脑血管疾病危险人群:<2.59	M	2014-09-06 09:32:17	部分凝血活酶时间	28.2	S	22-45	M	2014-09-06 09:46:15	*总胆固醇	2.65	mmol/l	3.6-5.17	L	2014-09-06 09:32:17	D二聚体	600	ng/ml	0-115	H	2014-09-06 09:46:15	*葡萄糖	9.32	mmol/l	3.89-6.11	H	2014-09-06 09:32:17	C反应蛋白	117.64	mg/l	0-8	H	2014-09-16 09:47:07	凝血酶原时间(PT)	15.1	S	42992	H	2014-09-06 09:46:15
797	1000208753001	凝血酶原国际比值	0.84		0.7-1.3	M	2014-09-06 12:04:27	低密度脂蛋白	2.26	mmol/l	健康人群:1.8-3.36;心脑血管疾病危险人群:<2.59	M	2014-09-06 10:43:40	部分凝血活酶时间	27.9	S	22-45	M	2014-09-06 11:46:01	*总胆固醇	4.94	mmol/l	3.6-5.17	M	2014-09-06 10:43:40	D二聚体	431	ng/ml	0-115	H	2014-09-06 11:48:42	*葡萄糖	4.79	mmol/l	3.89-6.11	M	2014-09-06 10:43:40	C反应蛋白	6.26	mg/l	0-8	M	2014-09-15 09:01:15	凝血酶原时间(PT)	11.3	S	43023	M	2014-09-06 12:04:27
798	1000208762001	凝血酶原国际比值	0.98		0.7-1.3	M	2014-09-06 09:44:00	低密度脂蛋白	2.06	mmol/l	健康人群:1.8-3.36;心脑血管疾病危险人群:<2.59	M	2014-09-06 09:32:07	部分凝血活酶时间	26.9	S	22-45	M	2014-09-06 09:44:00	*总胆固醇	4.28	mmol/l	3.6-5.17	M	2014-09-06 09:32:07	D二聚体	80	ng/ml	0-115	M	2014-09-06 09:44:00	*葡萄糖	9.16	mmol/l	3.89-6.11	H	2014-09-06 09:32:07	C反应蛋白	3.66	mg/l	0-8	M	2014-09-06 09:32:15	凝血酶原时间(PT)	11.3	S	42992	M	2014-09-06 09:44:00
799	1000208875001	凝血酶原国际比值	0.94		0.7-1.3	M	2014-09-07 09:47:28	低密度脂蛋白	3.04	mmol/l	健康人群:1.8-3.36;心脑血管疾病危险人群:<2.59	M	2014-09-07 09:38:14	部分凝血活酶时间	27.9	S	22-45	M	2014-09-07 09:47:28	*总胆固醇	5.6	mmol/l	3.6-5.17	H	2014-09-07 09:38:14	D二聚体	660	ng/ml	0-115	H	2014-09-07 09:47:28	*葡萄糖	5.6	mmol/l	3.89-6.11	M	2014-09-07 09:38:14	C反应蛋白	71.6	mg/l	0-8	H	2014-09-07 09:38:14	凝血酶原时间(PT)	10.8	S	42992	M	2014-09-07 09:47:28
800	1000208913001	凝血酶原国际比值	0.96		0.7-1.3	M	2014-09-07 09:36:30	低密度脂蛋白	3.44	mmol/l	健康人群:1.8-3.36;心脑血管疾病危险人群:<2.59	M	2014-09-07 08:54:33	部分凝血活酶时间	23.3	S	22-45	M	2014-09-07 09:36:30	*总胆固醇	6.1	mmol/l	3.6-5.17	H	2014-09-07 08:54:33	D二聚体	650	ng/ml	0-115	H	2014-09-07 09:36:30	*葡萄糖	4.7	mmol/l	3.89-6.11	M	2014-09-07 08:54:33	C反应蛋白	0.8	mg/l	0-8	M	2014-09-07 08:54:33	凝血酶原时间(PT)	11	S	42992	M	2014-09-07 09:36:30
801	1000208915001	凝血酶原国际比值	0.95		0.7-1.3	M	2014-09-07 09:15:27	低密度脂蛋白	2.27	mmol/l	健康人群:1.8-3.36;心脑血管疾病危险人群:<2.59	M	2014-09-07 08:52:56	部分凝血活酶时间	27.1	S	22-45	M	2014-09-07 09:15:27	*总胆固醇	5.7	mmol/l	3.6-5.17	H	2014-09-07 08:52:56	D二聚体	3049	ng/ml	0-115	H	2014-09-07 10:28:25	*葡萄糖	5	mmol/l	3.89-6.11	M	2014-09-07 08:52:56	C反应蛋白	76.6	mg/l	0-8	H	2014-09-07 08:52:56	凝血酶原时间(PT)	10.9	S	42992	M	2014-09-07 09:15:27
802	1000209074001	凝血酶原国际比值	0.9		0.7-1.3	M	2014-09-08 09:42:39	低密度脂蛋白	2.22	mmol/l	健康人群:1.8-3.36;心脑血管疾病危险人群:<2.59	M	2014-09-08 09:07:15	部分凝血活酶时间	28.1	S	22-45	M	2014-09-08 09:44:40	*总胆固醇	4.6	mmol/l	3.6-5.17	M	2014-09-08 09:07:15	D二聚体	1266	ng/ml	0-115	H	2014-09-08 09:35:17	*葡萄糖	5.38	mmol/l	3.89-6.11	M	2014-09-08 09:07:15	C反应蛋白	13.43	mg/l	0-8	H	2014-09-08 09:22:46	凝血酶原时间(PT)	11.9	S	43023	M	2014-09-08 09:42:39
803	1000209114001	凝血酶原国际比值	0.97		0.7-1.3	M	2014-09-08 09:38:23	低密度脂蛋白	2.42	mmol/l	健康人群:1.8-3.36;心脑血管疾病危险人群:<2.59	M	2014-09-08 08:57:46	部分凝血活酶时间	25.7	S	22-45	M	2014-09-08 09:38:23	*总胆固醇	4.19	mmol/l	3.6-5.17	M	2014-09-08 08:57:46	D二聚体	60	ng/ml	0-115	M	2014-09-08 09:38:23	*葡萄糖	7.37	mmol/l	3.89-6.11	H	2014-09-08 08:57:46	C反应蛋白	2.28	mg/l	0-8	M	2014-09-08 08:57:46	凝血酶原时间(PT)	11.1	S	42992	M	2014-09-08 09:38:23
804	1000209143001	凝血酶原国际比值	0.93		0.7-1.3	M	2014-09-09 09:30:12	低密度脂蛋白	2.46	mmol/l	健康人群:1.8-3.36;心脑血管疾病危险人群:<2.59	M	2014-09-09 09:01:52	部分凝血活酶时间	24.4	S	22-45	M	2014-09-09 09:30:12	*总胆固醇	4.51	mmol/l	3.6-5.17	M	2014-09-09 09:01:52	D二聚体	170	ng/ml	0-115	H	2014-09-09 10:54:41	*葡萄糖	9.2	mmol/l	3.89-6.11	H	2014-09-09 09:01:52	C反应蛋白	0.2	mg/l	0-8	M	2014-09-10 21:12:21	凝血酶原时间(PT)	10.7	S	42992	M	2014-09-09 09:30:12
805	1000209149001	凝血酶原国际比值	1.07		0.7-1.3	M	2014-09-09 09:23:46	低密度脂蛋白	1.74	mmol/l	健康人群:1.8-3.36;心脑血管疾病危险人群:<2.59	M	2014-09-09 09:08:38	部分凝血活酶时间	29	S	22-45	M	2014-09-09 09:23:46	*总胆固醇	3.37	mmol/l	3.6-5.17	L	2014-09-09 09:08:38	D二聚体	560	ng/ml	0-115	H	2014-09-09 09:23:46	*葡萄糖	4.69	mmol/l	3.89-6.11	M	2014-09-09 09:08:38	C反应蛋白	81.43	mg/l	0-8	H	2014-09-09 09:08:38	凝血酶原时间(PT)	12.3	S	42992	M	2014-09-09 09:23:46
806	1000209151001	凝血酶原国际比值	1		0.7-1.3	M	2014-09-09 09:30:51	低密度脂蛋白	1.92	mmol/l	健康人群:1.8-3.36;心脑血管疾病危险人群:<2.59	M	2014-09-09 09:12:03	部分凝血活酶时间	35	S	22-45	M	2014-09-09 09:34:53	*总胆固醇	3.64	mmol/l	3.6-5.17	M	2014-09-09 09:12:03	D二聚体	427	ng/ml	0-115	H	2014-09-09 09:16:50	*葡萄糖	4.68	mmol/l	3.89-6.11	M	2014-09-09 09:12:03	C反应蛋白	11.29	mg/l	0-8	H	2014-09-09 09:12:03	凝血酶原时间(PT)	13.1	S	43023	M	2014-09-09 09:30:51
807	1000209169002	凝血酶原国际比值	0.9		0.7-1.3	M	2016-05-04 13:50:17	低密度脂蛋白	3.07	mmol/l	健康人群:1.8-3.36;心脑血管疾病危险人群:<2.59	M	2016-05-04 11:46:54	部分凝血活酶时间	28.6	S	22-45	M	2016-05-04 13:50:17	*总胆固醇	5.53	mmol/l	3.6-5.17	H	2016-05-04 11:46:54	D二聚体	100	ng/ml	0-115	M	2016-05-04 13:50:17	*葡萄糖	5.03	mmol/l	3.89-6.11	M	2016-05-04 11:46:54	C反应蛋白	9.61	mg/l	0-8	H	2016-05-11 09:55:04	凝血酶原时间(PT)	10.4	S	42992	M	2016-05-04 13:50:17
808	1000209203001	凝血酶原国际比值	0.92		0.7-1.3	M	2014-09-10 09:27:26	低密度脂蛋白	1.99	mmol/l	健康人群:1.8-3.36;心脑血管疾病危险人群:<2.59	M	2014-09-10 09:08:40	部分凝血活酶时间	25.6	S	22-45	M	2014-09-10 09:27:26	*总胆固醇	3.62	mmol/l	3.6-5.17	M	2014-09-10 09:08:40	D二聚体	7660	ng/ml	0-115	H	2014-09-10 09:27:26	*葡萄糖	4.97	mmol/l	3.89-6.11	M	2014-09-10 09:08:40	C反应蛋白	2.27	mg/l	0-8	M	2014-09-10 08:59:08	凝血酶原时间(PT)	10.6	S	42992	M	2014-09-10 09:27:26
809	1000209203002	凝血酶原国际比值	0.98		0.7-1.3	M	2014-10-08 10:26:10	低密度脂蛋白	1.82	mmol/l	健康人群:1.8-3.36;心脑血管疾病危险人群:<2.59	M	2014-10-08 09:44:40	部分凝血活酶时间	26.1	S	22-45	M	2014-10-08 10:26:10	*总胆固醇	3.83	mmol/l	3.6-5.17	M	2014-10-08 09:04:33	D二聚体	2110	ng/ml	0-115	H	2014-10-08 10:26:10	*葡萄糖	5.36	mmol/l	3.89-6.11	M	2014-10-08 09:04:32	C反应蛋白	0.9	mg/l	0-8	M	2014-10-13 12:07:13	凝血酶原时间(PT)	11.3	S	42992	M	2014-10-08 10:26:10
810	1000209205001	凝血酶原国际比值	1.03		0.7-1.3	M	2014-09-09 11:20:16	低密度脂蛋白	2.06	mmol/l	健康人群:1.8-3.36;心脑血管疾病危险人群:<2.59	M	2014-09-09 11:29:22	部分凝血活酶时间	35.2	S	22-45	M	2014-09-09 11:20:16	*总胆固醇	4.03	mmol/l	3.6-5.17	M	2014-09-09 11:29:22	D二聚体	150	ng/ml	0-115	H	2014-09-09 11:30:17	*葡萄糖	4.86	mmol/l	3.89-6.11	M	2014-09-09 11:29:22	C反应蛋白	3.96	mg/l	0-8	M	2014-09-09 11:29:22	凝血酶原时间(PT)	11.8	S	42992	M	2014-09-09 11:20:16
811	1000209214002	凝血酶原国际比值	0.97		0.7-1.3	M	2016-02-26 12:43:41	低密度脂蛋白	3.08	mmol/l	健康人群:1.8-3.36;心脑血管疾病危险人群:<2.59	M	2016-02-26 12:53:29	部分凝血活酶时间	36.5	S	22-45	M	2016-02-26 12:44:41	*总胆固醇	5.49	mmol/l	3.6-5.17	H	2016-02-26 12:53:29	D二聚体	32	ng/ml	0-115	M	2016-02-26 12:30:01	*葡萄糖	5.75	mmol/l	3.89-6.11	M	2016-02-26 12:53:29	C反应蛋白	1.21	mg/l	0-8	M	2016-02-27 09:45:27	凝血酶原时间(PT)	13.1	S	43023	M	2016-02-26 12:43:41
812	1000209222001	凝血酶原国际比值	0.91		0.7-1.3	M	2014-09-09 10:41:04	低密度脂蛋白	2.68	mmol/l	健康人群:1.8-3.36;心脑血管疾病危险人群:<2.59	M	2014-09-09 10:42:31	部分凝血活酶时间	27.2	S	22-45	M	2014-09-09 10:41:04	*总胆固醇	5.62	mmol/l	3.6-5.17	H	2014-09-09 10:42:31	D二聚体	80	ng/ml	0-115	M	2014-09-09 10:41:04	*葡萄糖	5.19	mmol/l	3.89-6.11	M	2014-09-09 10:42:31	C反应蛋白	8.28	mg/l	0-8	H	2014-09-09 10:42:38	凝血酶原时间(PT)	10.5	S	42992	M	2014-09-09 10:41:04
813	1000209224001	凝血酶原国际比值	1.04		0.7-1.3	M	2014-09-10 11:01:51	低密度脂蛋白	2.86	mmol/l	健康人群:1.8-3.36;心脑血管疾病危险人群:<2.59	M	2014-09-10 09:08:48	部分凝血活酶时间	22.1	S	22-45	M	2014-09-10 11:20:10	*总胆固醇	5.21	mmol/l	3.6-5.17	H	2014-09-10 09:08:48	D二聚体	370	ng/ml	0-115	H	2014-09-10 11:01:51	*葡萄糖	5.95	mmol/l	3.89-6.11	M	2014-09-10 09:08:48	C反应蛋白	34.17	mg/l	0-8	H	2014-09-10 09:10:10	凝血酶原时间(PT)	12	S	42992	M	2014-09-10 11:01:51
814	1000209234001	凝血酶原国际比值	0.99		0.7-1.3	M	2014-09-10 10:38:20	低密度脂蛋白	2.45	mmol/l	健康人群:1.8-3.36;心脑血管疾病危险人群:<2.59	M	2014-09-10 10:33:35	部分凝血活酶时间	29.3	S	22-45	M	2014-09-10 10:38:20	*总胆固醇	4.92	mmol/l	3.6-5.17	M	2014-09-10 10:33:35	D二聚体	100	ng/ml	0-115	M	2014-09-10 11:18:44	*葡萄糖	6.01	mmol/l	3.89-6.11	M	2014-09-10 10:33:35	C反应蛋白	86.29	mg/l	0-8	H	2014-09-10 10:33:35	凝血酶原时间(PT)	11.4	S	42992	M	2014-09-10 10:38:20
815	1000209236001	凝血酶原国际比值	0.86		0.7-1.3	M	2014-09-10 10:42:10	低密度脂蛋白	2.1	mmol/l	健康人群:1.8-3.36;心脑血管疾病危险人群:<2.59	M	2014-09-10 10:33:11	部分凝血活酶时间	36.5	S	22-45	M	2014-09-10 10:39:49	*总胆固醇	4.02	mmol/l	3.6-5.17	M	2014-09-10 10:33:11	D二聚体	248	ng/ml	0-115	H	2014-09-10 09:40:19	*葡萄糖	4.34	mmol/l	3.89-6.11	M	2014-09-10 10:33:11	C反应蛋白	12.33	mg/l	0-8	H	2014-09-10 10:33:11	凝血酶原时间(PT)	11.5	S	43023	M	2014-09-10 10:42:10
816	1000209239001	凝血酶原国际比值	1		0.7-1.3	M	2014-09-09 11:24:37	低密度脂蛋白	2.69	mmol/l	健康人群:1.8-3.36;心脑血管疾病危险人群:<2.59	M	2014-09-09 11:26:47	部分凝血活酶时间	23.2	S	22-45	M	2014-09-09 11:30:28	*总胆固醇	4.71	mmol/l	3.6-5.17	M	2014-09-09 11:26:47	D二聚体	110	ng/ml	0-115	M	2014-09-09 11:30:33	*葡萄糖	5.56	mmol/l	3.89-6.11	M	2014-09-09 11:26:47	C反应蛋白	2.03	mg/l	0-8	M	2014-09-09 11:26:47	凝血酶原时间(PT)	11.5	S	42992	M	2014-09-09 11:24:37
817	1000209241001	凝血酶原国际比值	0.9		0.7-1.3	M	2014-09-10 11:00:54	低密度脂蛋白	2.15	mmol/l	健康人群:1.8-3.36;心脑血管疾病危险人群:<2.59	M	2014-09-10 09:38:15	部分凝血活酶时间	31.1	S	22-45	M	2014-09-10 10:58:28	*总胆固醇	4.3	mmol/l	3.6-5.17	M	2014-09-10 09:38:15	D二聚体	284	ng/ml	0-115	H	2014-09-10 10:04:58	*葡萄糖	4.05	mmol/l	3.89-6.11	M	2014-09-10 09:38:15	C反应蛋白	2.09	mg/l	0-8	M	2014-09-10 09:38:15	凝血酶原时间(PT)	11.9	S	43023	M	2014-09-10 11:00:54
818	1000209241002	凝血酶原国际比值	0.97		0.7-1.3	M	2014-09-29 15:12:16	低密度脂蛋白	2.44	mmol/l	健康人群:1.8-3.36;心脑血管疾病危险人群:<2.59	M	2014-09-29 15:27:10	部分凝血活酶时间	28.9	S	22-45	M	2014-09-29 15:14:26	*总胆固醇	4.3	mmol/l	3.6-5.17	M	2014-09-29 15:27:10	D二聚体	4288	ng/ml	0-115	H	2014-09-29 15:07:45	*葡萄糖	4.5	mmol/l	3.89-6.11	M	2014-09-29 15:27:09	C反应蛋白	1.9	mg/l	0-8	M	2014-09-29 15:27:10	凝血酶原时间(PT)	12.7	S	43023	M	2014-09-29 15:12:16
819	1000209254001	凝血酶原国际比值	1.03		0.7-1.3	M	2014-09-10 10:54:05	低密度脂蛋白	2.75	mmol/l	健康人群:1.8-3.36;心脑血管疾病危险人群:<2.59	M	2014-09-10 10:02:40	部分凝血活酶时间	23.9	S	22-45	M	2014-09-10 10:54:05	*总胆固醇	4.73	mmol/l	3.6-5.17	M	2014-09-10 10:02:40	D二聚体	80	ng/ml	0-115	M	2014-09-10 10:54:05	*葡萄糖	4.93	mmol/l	3.89-6.11	M	2014-09-10 10:02:40	C反应蛋白	1.86	mg/l	0-8	M	2014-09-10 10:02:40	凝血酶原时间(PT)	11.9	S	42992	M	2014-09-10 10:54:05
820	1000209255001	凝血酶原国际比值	0.9		0.7-1.3	M	2014-09-10 10:54:15	低密度脂蛋白	2.22	mmol/l	健康人群:1.8-3.36;心脑血管疾病危险人群:<2.59	M	2014-09-10 09:08:57	部分凝血活酶时间	32.7	S	22-45	M	2014-09-10 10:51:54	*总胆固醇	4.91	mmol/l	3.6-5.17	M	2014-09-10 09:08:57	D二聚体	185	ng/ml	0-115	H	2014-09-10 09:51:54	*葡萄糖	4.11	mmol/l	3.89-6.11	M	2014-09-10 09:08:57	C反应蛋白	133.69	mg/l	0-8	H	2014-09-10 09:08:57	凝血酶原时间(PT)	11.9	S	43023	M	2014-09-10 10:54:15
821	1000209257001	凝血酶原国际比值	0.97		0.7-1.3	M	2014-09-10 09:25:01	低密度脂蛋白	2.87	mmol/l	健康人群:1.8-3.36;心脑血管疾病危险人群:<2.59	M	2014-09-10 10:03:52	部分凝血活酶时间	23.7	S	22-45	M	2014-09-10 11:16:32	*总胆固醇	5.38	mmol/l	3.6-5.17	H	2014-09-10 10:03:52	D二聚体	110	ng/ml	0-115	M	2014-09-10 09:25:01	*葡萄糖	5.61	mmol/l	3.89-6.11	M	2014-09-10 10:03:52	C反应蛋白	1.71	mg/l	0-8	M	2014-09-10 11:13:46	凝血酶原时间(PT)	11.1	S	42992	M	2014-09-10 09:25:01
822	1000209305001	凝血酶原国际比值	1		0.7-1.3	M	2014-09-10 11:00:54	低密度脂蛋白	1.45	mmol/l	健康人群:1.8-3.36;心脑血管疾病危险人群:<2.59	M	2014-09-10 09:01:30	部分凝血活酶时间	41.6	S	22-45	M	2014-09-10 10:58:39	*总胆固醇	2.91	mmol/l	3.6-5.17	L	2014-09-10 09:01:30	D二聚体	3928	ng/ml	0-115	H	2014-09-10 10:03:23	*葡萄糖	3.83	mmol/l	3.89-6.11	L	2014-09-10 09:01:30	C反应蛋白	103.31	mg/l	0-8	H	2014-09-10 09:01:30	凝血酶原时间(PT)	13.1	S	43023	M	2014-09-10 11:00:54
823	1000209331004	凝血酶原国际比值	0.99		0.7-1.3	M	2016-04-24 10:19:45	低密度脂蛋白	1.97	mmol/l	健康人群:1.8-3.36;心脑血管疾病危险人群:<2.59	M	2016-04-24 09:48:49	部分凝血活酶时间	28.1	S	22-45	M	2016-04-24 10:19:45	*总胆固醇	4.26	mmol/l	3.6-5.17	M	2016-04-24 09:48:49	D二聚体	2820	ng/ml	0-115	H	2016-04-24 10:19:45	*葡萄糖	5.02	mmol/l	3.89-6.11	M	2016-04-24 09:48:49	C反应蛋白	23.2	mg/l	0-8	H	2016-04-27 18:40:47	凝血酶原时间(PT)	11.4	S	42992	M	2016-04-24 10:19:45
824	1000209341001	凝血酶原国际比值	0.92		0.7-1.3	M	2014-09-10 10:35:42	低密度脂蛋白	3.08	mmol/l	健康人群:1.8-3.36;心脑血管疾病危险人群:<2.59	M	2014-09-10 10:33:47	部分凝血活酶时间	32.2	S	22-45	M	2014-09-10 10:33:11	*总胆固醇	5.66	mmol/l	3.6-5.17	H	2014-09-10 10:33:47	D二聚体	343	ng/ml	0-115	H	2014-09-10 09:36:12	*葡萄糖	5.51	mmol/l	3.89-6.11	M	2014-09-10 10:33:47	C反应蛋白	160.03	mg/l	0-8	H	2014-09-10 10:33:47	凝血酶原时间(PT)	12.2	S	43023	M	2014-09-10 10:35:42
825	1000209360001	凝血酶原国际比值	1.09		0.7-1.3	M	2014-09-10 12:20:04	低密度脂蛋白	2.59	mmol/l	健康人群:1.8-3.36;心脑血管疾病危险人群:<2.59	M	2014-09-10 11:09:03	部分凝血活酶时间	27.5	S	22-45	M	2014-09-10 12:20:04	*总胆固醇	4.73	mmol/l	3.6-5.17	M	2014-09-10 11:09:03	D二聚体	120	ng/ml	0-115	H	2014-09-10 12:20:04	*葡萄糖	5.68	mmol/l	3.89-6.11	M	2014-09-10 11:09:03	C反应蛋白	15.76	mg/l	0-8	H	2014-09-10 11:09:03	凝血酶原时间(PT)	12.6	S	42992	M	2014-09-10 12:20:04
826	1000209369001	凝血酶原国际比值	0.95		0.7-1.3	M	2014-09-11 10:59:03	低密度脂蛋白	2.17	mmol/l	健康人群:1.8-3.36;心脑血管疾病危险人群:<2.59	M	2014-09-11 10:00:37	部分凝血活酶时间	33.6	S	22-45	M	2014-09-11 10:59:03	*总胆固醇	4.12	mmol/l	3.6-5.17	M	2014-09-11 10:00:37	D二聚体	250	ng/ml	0-115	H	2014-09-11 10:59:03	*葡萄糖	5.14	mmol/l	3.89-6.11	M	2014-09-11 10:00:37	C反应蛋白	5.83	mg/l	0-8	M	2014-09-11 10:00:37	凝血酶原时间(PT)	10.9	S	42992	M	2014-09-11 10:59:03
827	1000209382001	凝血酶原国际比值	1.01		0.7-1.3	M	2014-09-11 10:59:05	低密度脂蛋白	3.53	mmol/l	健康人群:1.8-3.36;心脑血管疾病危险人群:<2.59	M	2014-09-11 09:09:30	部分凝血活酶时间	24.5	S	22-45	M	2014-09-11 10:59:05	*总胆固醇	6.84	mmol/l	3.6-5.17	H	2014-09-11 09:09:30	D二聚体	1000	ng/ml	0-115	H	2014-09-11 10:59:05	*葡萄糖	4.89	mmol/l	3.89-6.11	M	2014-09-11 09:09:30	C反应蛋白	3.46	mg/l	0-8	M	2014-09-11 09:09:30	凝血酶原时间(PT)	11.6	S	42992	M	2014-09-11 10:59:05
828	1000209407001	凝血酶原国际比值	0.99		0.7-1.3	M	2014-09-11 09:40:25	低密度脂蛋白	3.08	mmol/l	健康人群:1.8-3.36;心脑血管疾病危险人群:<2.59	M	2014-09-11 09:45:00	部分凝血活酶时间	22.6	S	22-45	M	2014-09-11 09:40:25	*总胆固醇	4.85	mmol/l	3.6-5.17	M	2014-09-11 09:45:00	D二聚体	3080	ng/ml	0-115	H	2014-09-11 09:40:25	*葡萄糖	8.58	mmol/l	3.89-6.11	H	2014-09-11 09:45:00	C反应蛋白	59.81	mg/l	0-8	H	2014-09-23 09:09:32	凝血酶原时间(PT)	11.4	S	42992	M	2014-09-11 09:40:25
829	1000209407002	凝血酶原国际比值	0.89		0.7-1.3	M	2016-04-07 09:43:58	低密度脂蛋白	2.03	mmol/l	健康人群:1.8-3.36;心脑血管疾病危险人群:<2.59	M	2016-04-07 10:35:22	部分凝血活酶时间	33.8	S	22-45	M	2016-04-07 09:43:58	*总胆固醇	3.96	mmol/l	3.6-5.17	M	2016-04-07 10:35:22	D二聚体	390	ng/ml	0-115	H	2016-04-07 09:43:58	*葡萄糖	6.25	mmol/l	3.89-6.11	H	2016-04-07 10:35:22	C反应蛋白	53.28	mg/l	0-8	H	2016-04-14 09:08:03	凝血酶原时间(PT)	10.3	S	42992	M	2016-04-07 09:43:58
830	1000209425001	凝血酶原国际比值	0.95		0.7-1.3	M	2014-09-10 14:06:20	低密度脂蛋白	1.29	mmol/l	健康人群:1.8-3.36;心脑血管疾病危险人群:<2.59	M	2014-09-11 08:38:49	部分凝血活酶时间	36.4	S	22-45	M	2014-09-10 14:05:45	*总胆固醇	3.36	mmol/l	3.6-5.17	L	2014-09-11 08:38:49	D二聚体	775	ng/ml	0-115	H	2014-09-12 17:02:50	*葡萄糖	7.14	mmol/l	3.89-6.11	H	2014-09-11 08:38:49	C反应蛋白	222.05	mg/l	0-8	H	2014-09-11 08:38:49	凝血酶原时间(PT)	12.5	S	43023	M	2014-09-10 14:06:20
831	1000209425002	凝血酶原国际比值	1.08		0.7-1.3	M	2016-11-08 10:29:52	低密度脂蛋白	1.51	mmol/l	健康人群:1.8-3.36;心脑血管疾病危险人群:<2.59	M	2016-11-08 10:29:44	部分凝血活酶时间	27.9	S	20-40	M	2016-11-08 10:29:52	*总胆固醇	3.24	mmol/l	3.6-5.17	L	2016-11-08 10:29:44	D二聚体	120	ng/ml	0-115	H	2016-11-08 10:29:52	*葡萄糖	5.07	mmol/l	3.89-6.11	M	2016-11-08 10:29:44	C反应蛋白	4.46	mg/l	0-8	M	2016-11-08 10:29:44	凝血酶原时间(PT)	12.4	S	42992	M	2016-11-08 10:29:52
832	1000209428001	凝血酶原国际比值	0.98		0.7-1.3	M	2014-09-11 10:57:27	低密度脂蛋白	2.75	mmol/l	健康人群:1.8-3.36;心脑血管疾病危险人群:<2.59	M	2014-09-11 09:59:57	部分凝血活酶时间	26.4	S	22-45	M	2014-09-11 10:57:27	*总胆固醇	4.74	mmol/l	3.6-5.17	M	2014-09-11 09:59:57	D二聚体	30	ng/ml	0-115	M	2014-09-11 10:57:27	*葡萄糖	4.2	mmol/l	3.89-6.11	M	2014-09-11 09:59:57	C反应蛋白	2.24	mg/l	0-8	M	2014-09-11 09:59:57	凝血酶原时间(PT)	11.3	S	42992	M	2014-09-11 10:57:27
833	1000209428002	凝血酶原国际比值	0.94		0.7-1.3	M	2014-12-03 14:29:56	低密度脂蛋白	2.73	mmol/l	健康人群:1.8-3.36;心脑血管疾病危险人群:<2.59	M	2014-12-03 12:46:42	部分凝血活酶时间	24.4	S	22-45	M	2014-12-03 14:29:56	*总胆固醇	5.6	mmol/l	3.6-5.17	H	2014-12-03 12:46:42	D二聚体	30	ng/ml	0-115	M	2014-12-03 14:29:56	*葡萄糖	6.1	mmol/l	3.89-6.11	M	2014-12-03 12:46:42	C反应蛋白	1.9	mg/l	0-8	M	2014-12-03 12:46:42	凝血酶原时间(PT)	10.8	S	42992	M	2014-12-03 14:29:56
834	1000209445001	凝血酶原国际比值	1.01		0.7-1.3	M	2014-09-11 11:13:12	低密度脂蛋白	2.78	mmol/l	健康人群:1.8-3.36;心脑血管疾病危险人群:<2.59	M	2014-09-11 10:18:24	部分凝血活酶时间	23.6	S	22-45	M	2014-09-11 11:36:44	*总胆固醇	5.14	mmol/l	3.6-5.17	M	2014-09-11 10:18:24	D二聚体	1690	ng/ml	0-115	H	2014-09-11 11:13:12	*葡萄糖	7.71	mmol/l	3.89-6.11	H	2014-09-11 10:18:24	C反应蛋白	14.72	mg/l	0-8	H	2014-09-11 09:59:51	凝血酶原时间(PT)	11.6	S	42992	M	2014-09-11 11:13:12
835	1000209466001	凝血酶原国际比值	0.91		0.7-1.3	M	2014-09-11 09:28:34	低密度脂蛋白	1.77	mmol/l	健康人群:1.8-3.36;心脑血管疾病危险人群:<2.59	M	2014-09-11 09:15:26	部分凝血活酶时间	20.7	S	22-45	L	2014-09-11 09:28:34	*总胆固醇	3.68	mmol/l	3.6-5.17	M	2014-09-11 09:15:26	D二聚体	290	ng/ml	0-115	H	2014-09-11 09:28:34	*葡萄糖	6.02	mmol/l	3.89-6.11	M	2014-09-11 09:15:26	C反应蛋白	2.11	mg/l	0-8	M	2014-09-16 09:23:54	凝血酶原时间(PT)	10.5	S	42992	M	2014-09-11 09:28:34
836	1000209470001	凝血酶原国际比值	0.86		0.7-1.3	M	2014-09-12 10:32:07	低密度脂蛋白	0.92	mmol/l	健康人群:1.8-3.36;心脑血管疾病危险人群:<2.59	M	2014-09-12 09:33:08	部分凝血活酶时间	29.5	S	22-45	M	2014-09-12 10:27:45	*总胆固醇	2.6	mmol/l	3.6-5.17	L	2014-09-12 09:33:08	D二聚体	185	ng/ml	0-115	H	2014-09-12 09:16:32	*葡萄糖	9.74	mmol/l	3.89-6.11	H	2014-09-12 09:33:08	C反应蛋白	2.66	mg/l	0-8	M	2014-09-12 09:33:08	凝血酶原时间(PT)	11.5	S	43023	M	2014-09-12 10:32:07
837	1000209499001	凝血酶原国际比值	0.97		0.7-1.3	M	2014-09-12 09:21:58	低密度脂蛋白	3.12	mmol/l	健康人群:1.8-3.36;心脑血管疾病危险人群:<2.59	M	2014-09-12 09:19:17	部分凝血活酶时间	28.6	S	22-45	M	2014-09-12 09:21:58	*总胆固醇	6.07	mmol/l	3.6-5.17	H	2014-09-12 09:19:17	D二聚体	60	ng/ml	0-115	M	2014-09-12 09:21:58	*葡萄糖	5.05	mmol/l	3.89-6.11	M	2014-09-12 09:19:17	C反应蛋白	2.66	mg/l	0-8	M	2014-09-12 09:19:17	凝血酶原时间(PT)	11.1	S	42992	M	2014-09-12 09:21:58
838	1000209502001	凝血酶原国际比值	1.03		0.7-1.3	M	2014-09-11 13:21:22	低密度脂蛋白	2.55	mmol/l	健康人群:1.8-3.36;心脑血管疾病危险人群:<2.59	M	2014-09-11 13:03:19	部分凝血活酶时间	31.4	S	22-45	M	2014-09-11 13:21:22	*总胆固醇	5.1	mmol/l	3.6-5.17	M	2014-09-11 13:03:19	D二聚体	60	ng/ml	0-115	M	2014-09-11 13:21:22	*葡萄糖	4.3	mmol/l	3.89-6.11	M	2014-09-11 13:03:19	C反应蛋白	0.1	mg/l	0-8	M	2014-09-11 13:15:21	凝血酶原时间(PT)	11.9	S	42992	M	2014-09-11 13:21:22
839	1000209530001	凝血酶原国际比值	0.95		0.7-1.3	M	2014-09-11 15:36:55	低密度脂蛋白	2.37	mmol/l	健康人群:1.8-3.36;心脑血管疾病危险人群:<2.59	M	2014-09-11 15:34:45	部分凝血活酶时间	23.6	S	22-45	M	2014-09-11 16:17:03	*总胆固醇	4.4	mmol/l	3.6-5.17	M	2014-09-11 15:34:45	D二聚体	220	ng/ml	0-115	H	2014-09-11 15:36:55	*葡萄糖	13.4	mmol/l	3.89-6.11	H	2014-09-11 15:34:45	C反应蛋白	7.7	mg/l	0-8	M	2014-09-13 08:41:55	凝血酶原时间(PT)	10.9	S	42992	M	2014-09-11 15:36:55
840	1000209531001	凝血酶原国际比值	1.01		0.7-1.3	M	2014-09-12 10:29:17	低密度脂蛋白	1.94	mmol/l	健康人群:1.8-3.36;心脑血管疾病危险人群:<2.59	M	2014-09-12 09:56:53	部分凝血活酶时间	24.3	S	22-45	M	2014-09-12 11:07:23	*总胆固醇	4.44	mmol/l	3.6-5.17	M	2014-09-12 09:56:53	D二聚体	200	ng/ml	0-115	H	2014-09-12 10:29:17	*葡萄糖	4.41	mmol/l	3.89-6.11	M	2014-09-12 09:56:53	C反应蛋白	7.21	mg/l	0-8	M	2014-09-12 09:56:53	凝血酶原时间(PT)	11.6	S	42992	M	2014-09-12 10:29:17
841	1000209549001	凝血酶原国际比值	0.94		0.7-1.3	M	2014-09-12 10:32:22	低密度脂蛋白	2.78	mmol/l	健康人群:1.8-3.36;心脑血管疾病危险人群:<2.59	M	2014-09-12 09:17:53	部分凝血活酶时间	30.9	S	22-45	M	2014-09-12 10:35:58	*总胆固醇	4.5	mmol/l	3.6-5.17	M	2014-09-12 09:17:53	D二聚体	279	ng/ml	0-115	H	2014-09-12 09:38:14	*葡萄糖	5.36	mmol/l	3.89-6.11	M	2014-09-12 09:17:53	C反应蛋白	3.52	mg/l	0-8	M	2014-09-12 09:18:20	凝血酶原时间(PT)	12.4	S	43023	M	2014-09-12 10:32:22
842	1000209565001	凝血酶原国际比值	1.13		0.7-1.3	M	2014-09-12 08:51:44	低密度脂蛋白	2.25	mmol/l	健康人群:1.8-3.36;心脑血管疾病危险人群:<2.59	M	2014-09-12 09:56:27	部分凝血活酶时间	22.1	S	22-45	M	2014-09-12 10:46:52	*总胆固醇	4.1	mmol/l	3.6-5.17	M	2014-09-12 09:56:27	D二聚体	7320	ng/ml	0-115	H	2014-09-12 08:51:44	*葡萄糖	4.51	mmol/l	3.89-6.11	M	2014-09-12 09:56:27	C反应蛋白	63.1	mg/l	0-8	H	2014-09-29 08:46:01	凝血酶原时间(PT)	13	S	42992	M	2014-09-12 08:51:44
843	1000209575001	凝血酶原国际比值	1.04		0.7-1.3	M	2014-09-13 10:23:37	低密度脂蛋白	2.39	mmol/l	健康人群:1.8-3.36;心脑血管疾病危险人群:<2.59	M	2014-09-13 09:15:48	部分凝血活酶时间	28.3	S	22-45	M	2014-09-13 10:23:37	*总胆固醇	4.15	mmol/l	3.6-5.17	M	2014-09-13 09:15:48	D二聚体	200	ng/ml	0-115	H	2014-09-13 10:23:37	*葡萄糖	3.57	mmol/l	3.89-6.11	L	2014-09-13 09:15:48	C反应蛋白	5.18	mg/l	0-8	M	2014-09-13 09:15:48	凝血酶原时间(PT)	12	S	42992	M	2014-09-13 10:23:37
844	1000209587001	凝血酶原国际比值	1.06		0.7-1.3	M	2014-09-13 11:20:55	低密度脂蛋白	2.88	mmol/l	健康人群:1.8-3.36;心脑血管疾病危险人群:<2.59	M	2014-09-13 09:42:23	部分凝血活酶时间	23.5	S	22-45	M	2014-09-13 11:20:55	*总胆固醇	5.1	mmol/l	3.6-5.17	M	2014-09-13 09:42:23	D二聚体	140	ng/ml	0-115	H	2014-09-13 11:20:55	*葡萄糖	5.61	mmol/l	3.89-6.11	M	2014-09-13 09:42:23	C反应蛋白	2.43	mg/l	0-8	M	2014-09-13 09:42:23	凝血酶原时间(PT)	12.2	S	42992	M	2014-09-13 11:20:55
845	1000209607001	凝血酶原国际比值	1.03		0.7-1.3	M	2014-09-13 09:44:21	低密度脂蛋白	3.19	mmol/l	健康人群:1.8-3.36;心脑血管疾病危险人群:<2.59	M	2014-09-13 09:42:21	部分凝血活酶时间	27.6	S	22-45	M	2014-09-13 09:44:21	*总胆固醇	5.33	mmol/l	3.6-5.17	H	2014-09-13 09:42:21	D二聚体	70	ng/ml	0-115	M	2014-09-13 09:44:21	*葡萄糖	4.78	mmol/l	3.89-6.11	M	2014-09-13 09:42:21	C反应蛋白	1.84	mg/l	0-8	M	2014-09-13 09:29:43	凝血酶原时间(PT)	11.9	S	42992	M	2014-09-13 09:44:21
846	1000209619001	凝血酶原国际比值	1.32		0.7-1.3	H	2014-09-13 11:14:42	低密度脂蛋白	1.74	mmol/l	健康人群:1.8-3.36;心脑血管疾病危险人群:<2.59	M	2014-09-13 09:55:20	部分凝血活酶时间	24.9	S	22-45	M	2014-09-13 11:14:42	*总胆固醇	3.33	mmol/l	3.6-5.17	L	2014-09-13 09:55:20	D二聚体	3150	ng/ml	0-115	H	2014-09-13 11:14:42	*葡萄糖	4.76	mmol/l	3.89-6.11	M	2014-09-13 09:55:20	C反应蛋白	9.49	mg/l	0-8	H	2014-09-13 09:55:20	凝血酶原时间(PT)	15.2	S	42992	H	2014-09-13 11:14:42
847	1000209628001	凝血酶原国际比值	1.03		0.7-1.3	M	2014-09-13 09:58:58	低密度脂蛋白	3.02	mmol/l	健康人群:1.8-3.36;心脑血管疾病危险人群:<2.59	M	2014-09-13 09:29:28	部分凝血活酶时间	25.5	S	22-45	M	2014-09-13 09:58:58	*总胆固醇	5.05	mmol/l	3.6-5.17	M	2014-09-13 09:29:28	D二聚体	590	ng/ml	0-115	H	2014-09-13 09:58:58	*葡萄糖	8.09	mmol/l	3.89-6.11	H	2014-09-13 09:29:28	C反应蛋白	2.5	mg/l	0-8	M	2014-09-23 11:30:55	凝血酶原时间(PT)	11.8	S	42992	M	2014-09-13 09:58:58
848	1000209632001	凝血酶原国际比值	0.96		0.7-1.3	M	2014-09-13 11:13:41	低密度脂蛋白	4.24	mmol/l	健康人群:1.8-3.36;心脑血管疾病危险人群:<2.59	M	2014-09-13 09:45:25	部分凝血活酶时间	19.4	S	22-45	L	2014-09-13 11:13:41	*总胆固醇	6.98	mmol/l	3.6-5.17	H	2014-09-13 09:45:25	D二聚体	270	ng/ml	0-115	H	2014-09-13 11:13:41	*葡萄糖	5.02	mmol/l	3.89-6.11	M	2014-09-13 09:45:25	C反应蛋白	7.48	mg/l	0-8	M	2014-09-13 09:45:25	凝血酶原时间(PT)	11	S	42992	M	2014-09-13 11:13:41
849	1000209639001	凝血酶原国际比值	1.1		0.7-1.3	M	2014-09-13 10:30:48	低密度脂蛋白	1.97	mmol/l	健康人群:1.8-3.36;心脑血管疾病危险人群:<2.59	M	2014-09-13 09:14:31	部分凝血活酶时间	36.7	S	22-45	M	2014-09-13 10:30:48	*总胆固醇	3.47	mmol/l	3.6-5.17	L	2014-09-13 09:14:31	D二聚体	160	ng/ml	0-115	H	2014-09-13 10:30:48	*葡萄糖	4.16	mmol/l	3.89-6.11	M	2014-09-13 09:14:31	C反应蛋白	2.11	mg/l	0-8	M	2014-09-13 09:14:31	凝血酶原时间(PT)	12.7	S	42992	M	2014-09-13 10:30:48
850	1000209649001	凝血酶原国际比值	1.03		0.7-1.3	M	2014-09-13 10:18:26	低密度脂蛋白	2.73	mmol/l	健康人群:1.8-3.36;心脑血管疾病危险人群:<2.59	M	2014-09-13 09:45:37	部分凝血活酶时间	22	S	22-45	M	2014-09-13 10:18:26	*总胆固醇	4.59	mmol/l	3.6-5.17	M	2014-09-13 09:45:37	D二聚体	2830	ng/ml	0-115	H	2014-09-13 10:18:26	*葡萄糖	10.03	mmol/l	3.89-6.11	H	2014-09-13 09:45:37	C反应蛋白	58.63	mg/l	0-8	H	2014-09-13 09:29:16	凝血酶原时间(PT)	11.8	S	42992	M	2014-09-13 10:18:26
851	1000209652001	凝血酶原国际比值	1.23		0.7-1.3	M	2014-09-13 09:46:36	低密度脂蛋白	1.77	mmol/l	健康人群:1.8-3.36;心脑血管疾病危险人群:<2.59	M	2014-09-13 09:41:55	部分凝血活酶时间	44.1	S	22-45	M	2014-09-13 09:46:36	*总胆固醇	3.55	mmol/l	3.6-5.17	L	2014-09-13 09:41:55	D二聚体	1560	ng/ml	0-115	H	2014-09-13 09:46:36	*葡萄糖	4.36	mmol/l	3.89-6.11	M	2014-09-13 09:41:55	C反应蛋白	111.63	mg/l	0-8	H	2014-09-13 09:41:55	凝血酶原时间(PT)	14.2	S	42992	H	2014-09-13 09:46:36
852	1000209653001	凝血酶原国际比值	1.17		0.7-1.3	M	2014-09-13 11:02:58	低密度脂蛋白	1.9	mmol/l	健康人群:1.8-3.36;心脑血管疾病危险人群:<2.59	M	2014-09-13 09:52:34	部分凝血活酶时间	22	S	22-45	M	2014-09-13 11:02:58	*总胆固醇	3.72	mmol/l	3.6-5.17	M	2014-09-13 09:52:34	D二聚体	2700	ng/ml	0-115	H	2014-09-13 11:02:58	*葡萄糖	6.55	mmol/l	3.89-6.11	H	2014-09-13 09:52:34	C反应蛋白	71.96	mg/l	0-8	H	2014-09-13 09:52:34	凝血酶原时间(PT)	13.5	S	42992	M	2014-09-13 11:02:58
853	1000209655001	凝血酶原国际比值	1.05		0.7-1.3	M	2014-09-13 11:16:33	低密度脂蛋白	1.35	mmol/l	健康人群:1.8-3.36;心脑血管疾病危险人群:<2.59	M	2014-09-13 09:29:26	部分凝血活酶时间	23.5	S	22-45	M	2014-09-13 11:16:33	*总胆固醇	2.59	mmol/l	3.6-5.17	L	2014-09-13 09:29:26	D二聚体	380	ng/ml	0-115	H	2014-09-13 11:16:33	*葡萄糖	9.81	mmol/l	3.89-6.11	H	2014-09-13 09:29:26	C反应蛋白	34.51	mg/l	0-8	H	2014-09-24 08:46:53	凝血酶原时间(PT)	12.1	S	42992	M	2014-09-13 11:16:33
854	1000209655002	凝血酶原国际比值	1		0.7-1.3	M	2015-04-24 11:50:07	低密度脂蛋白	2.42	mmol/l	健康人群:1.8-3.36;心脑血管疾病危险人群:<2.59	M	2015-04-24 10:29:00	部分凝血活酶时间	29.1	S	22-45	M	2015-04-24 11:50:07	*总胆固醇	4.66	mmol/l	3.6-5.17	M	2015-04-24 10:29:00	D二聚体	160	ng/ml	0-115	H	2015-04-24 11:50:07	*葡萄糖	5.33	mmol/l	3.89-6.11	M	2015-04-24 10:29:00	C反应蛋白	7.03	mg/l	0-8	M	2015-04-24 10:29:00	凝血酶原时间(PT)	11.5	S	42992	M	2015-04-24 11:50:07
855	1000209718001	凝血酶原国际比值	1.09		0.7-1.3	M	2014-09-13 19:05:04	低密度脂蛋白	3.02	mmol/l	健康人群:1.8-3.36;心脑血管疾病危险人群:<2.59	M	2014-09-13 19:07:08	部分凝血活酶时间	22	S	22-45	M	2014-09-13 19:11:55	*总胆固醇	5.1	mmol/l	3.6-5.17	M	2014-09-13 19:07:08	D二聚体	40	ng/ml	0-115	M	2014-09-13 19:05:04	*葡萄糖	5.7	mmol/l	3.89-6.11	M	2014-09-13 19:07:08	C反应蛋白	63.45	mg/l	0-8	H	2014-09-16 09:46:32	凝血酶原时间(PT)	12.6	S	42992	M	2014-09-13 19:05:04
856	1000209735001	凝血酶原国际比值	0.92		0.7-1.3	M	2014-09-15 10:38:20	低密度脂蛋白	2.94	mmol/l	健康人群:1.8-3.36;心脑血管疾病危险人群:<2.59	M	2014-09-15 09:00:47	部分凝血活酶时间	34.2	S	22-45	M	2014-09-15 10:42:06	*总胆固醇	4.81	mmol/l	3.6-5.17	M	2014-09-15 09:00:47	D二聚体	100	ng/ml	0-115	M	2014-09-15 10:00:04	*葡萄糖	4.96	mmol/l	3.89-6.11	M	2014-09-15 09:00:47	C反应蛋白	1.71	mg/l	0-8	M	2014-09-15 09:00:47	凝血酶原时间(PT)	12.2	S	43023	M	2014-09-15 10:38:20
857	1000209746003	凝血酶原国际比值	0.96		0.7-1.3	M	2016-07-29 14:59:10	低密度脂蛋白	1.37	mmol/l	健康人群:1.8-3.36;心脑血管疾病危险人群:<2.59	M	2016-08-06 07:15:10	部分凝血活酶时间	28.3	S	20-40	M	2016-07-29 14:59:10	*总胆固醇	3.5	mmol/l	3.6-5.17	L	2016-08-06 07:15:10	D二聚体	2010	ng/ml	0-115	H	2016-07-29 14:59:10	*葡萄糖	5.4	mmol/l	3.89-6.11	M	2016-08-06 07:15:10	C反应蛋白	30.3	mg/l	0-8	H	2016-07-29 15:10:34	凝血酶原时间(PT)	11.1	S	42992	M	2016-07-29 14:59:10
858	1000209797001	凝血酶原国际比值	0.99		0.7-1.3	M	2014-09-15 10:17:14	低密度脂蛋白	2.94	mmol/l	健康人群:1.8-3.36;心脑血管疾病危险人群:<2.59	M	2014-09-15 10:17:43	部分凝血活酶时间	30	S	22-45	M	2014-09-15 10:17:14	*总胆固醇	4.96	mmol/l	3.6-5.17	M	2014-09-15 10:17:43	D二聚体	70	ng/ml	0-115	M	2014-09-15 10:17:14	*葡萄糖	5.07	mmol/l	3.89-6.11	M	2014-09-15 10:17:43	C反应蛋白	1.68	mg/l	0-8	M	2014-09-15 10:17:43	凝血酶原时间(PT)	11.4	S	42992	M	2014-09-15 10:17:14
859	1000209809001	凝血酶原国际比值	1.02		0.7-1.3	M	2014-09-15 11:48:48	低密度脂蛋白	1.79	mmol/l	健康人群:1.8-3.36;心脑血管疾病危险人群:<2.59	M	2014-09-15 11:16:55	部分凝血活酶时间	22.8	S	22-45	M	2014-09-15 11:50:13	*总胆固醇	4.13	mmol/l	3.6-5.17	M	2014-09-15 11:16:55	D二聚体	80	ng/ml	0-115	M	2014-09-15 11:48:48	*葡萄糖	5.86	mmol/l	3.89-6.11	M	2014-09-15 11:16:55	C反应蛋白	2.18	mg/l	0-8	M	2014-09-15 11:16:55	凝血酶原时间(PT)	11.7	S	42992	M	2014-09-15 11:48:48
860	1000209819001	凝血酶原国际比值	0.89		0.7-1.3	M	2014-09-15 11:12:06	低密度脂蛋白	3.97	mmol/l	健康人群:1.8-3.36;心脑血管疾病危险人群:<2.59	M	2014-09-15 11:16:45	部分凝血活酶时间	30.2	S	22-45	M	2014-09-15 11:08:08	*总胆固醇	6.74	mmol/l	3.6-5.17	H	2014-09-15 11:16:45	D二聚体	115	ng/ml	0-115	M	2014-09-15 11:08:18	*葡萄糖	5.25	mmol/l	3.89-6.11	M	2014-09-15 11:16:44	C反应蛋白	1.69	mg/l	0-8	M	2014-09-15 11:16:44	凝血酶原时间(PT)	11.8	S	43023	M	2014-09-15 11:12:06
861	1000209821001	凝血酶原国际比值	1.09		0.7-1.3	M	2014-09-16 10:59:12	低密度脂蛋白	3.54	mmol/l	健康人群:1.8-3.36;心脑血管疾病危险人群:<2.59	M	2014-09-16 09:14:02	部分凝血活酶时间	22.5	S	22-45	M	2014-09-16 10:59:12	*总胆固醇	6.3	mmol/l	3.6-5.17	H	2014-09-16 09:14:02	D二聚体	60	ng/ml	0-115	M	2014-09-16 10:59:12	*葡萄糖	5.74	mmol/l	3.89-6.11	M	2014-09-16 09:14:02	C反应蛋白	1.96	mg/l	0-8	M	2014-09-16 09:14:02	凝血酶原时间(PT)	12.5	S	42992	M	2014-09-16 10:59:12
862	1000209821004	凝血酶原国际比值	0.81		0.7-1.3	M	2015-10-01 10:24:33	低密度脂蛋白	2.63	mmol/l	健康人群:1.8-3.36;心脑血管疾病危险人群:<2.59	M	2015-10-01 10:10:18	部分凝血活酶时间	24.9	S	22-45	M	2015-10-01 10:24:33	*总胆固醇	5.17	mmol/l	3.6-5.17	M	2015-10-01 10:10:18	D二聚体	60	ng/ml	0-115	M	2015-10-01 10:24:33	*葡萄糖	5.48	mmol/l	3.89-6.11	M	2015-10-01 10:10:18	C反应蛋白	1.41	mg/l	0-8	M	2015-10-01 10:10:18	凝血酶原时间(PT)	9.4	S	42992	M	2015-10-01 10:24:33
863	1000209830001	凝血酶原国际比值	0.82		0.7-1.3	M	2014-09-16 11:21:47	低密度脂蛋白	1.91	mmol/l	健康人群:1.8-3.36;心脑血管疾病危险人群:<2.59	M	2014-09-16 09:24:02	部分凝血活酶时间	28.4	S	22-45	M	2014-09-16 11:19:26	*总胆固醇	3.7	mmol/l	3.6-5.17	M	2014-09-16 09:24:02	D二聚体	341	ng/ml	0-115	H	2014-09-16 10:29:51	*葡萄糖	4.64	mmol/l	3.89-6.11	M	2014-09-16 09:24:02	C反应蛋白	3.83	mg/l	0-8	M	2014-09-16 09:24:02	凝血酶原时间(PT)	11	S	43023	M	2014-09-16 11:21:47
864	1000209830002	凝血酶原国际比值	0.9		0.7-1.3	M	2016-04-16 10:26:56	低密度脂蛋白	1.88	mmol/l	健康人群:1.8-3.36;心脑血管疾病危险人群:<2.59	M	2016-04-16 09:24:43	部分凝血活酶时间	23	S	22-45	M	2016-04-16 10:26:56	*总胆固醇	4.86	mmol/l	3.6-5.17	M	2016-04-16 09:24:43	D二聚体	520	ng/ml	0-115	H	2016-04-16 10:26:56	*葡萄糖	5.46	mmol/l	3.89-6.11	M	2016-04-16 09:24:43	C反应蛋白	18.27	mg/l	0-8	H	2016-04-16 09:24:43	凝血酶原时间(PT)	10.4	S	42992	M	2016-04-16 10:26:56
865	1000209845001	凝血酶原国际比值	0.88		0.7-1.3	M	2014-09-16 10:42:40	低密度脂蛋白	2.94	mmol/l	健康人群:1.8-3.36;心脑血管疾病危险人群:<2.59	M	2014-09-16 09:46:29	部分凝血活酶时间	33	S	22-45	M	2014-09-16 10:46:22	*总胆固醇	6.19	mmol/l	3.6-5.17	H	2014-09-16 09:46:29	D二聚体	81	ng/ml	0-115	M	2014-09-16 09:44:37	*葡萄糖	4.39	mmol/l	3.89-6.11	M	2014-09-16 09:46:29	C反应蛋白	2.08	mg/l	0-8	M	2014-09-16 09:46:29	凝血酶原时间(PT)	11.7	S	43023	M	2014-09-16 10:42:40
866	1000209859001	凝血酶原国际比值	0.86		0.7-1.3	M	2014-09-16 10:59:17	低密度脂蛋白	3.41	mmol/l	健康人群:1.8-3.36;心脑血管疾病危险人群:<2.59	M	2014-09-16 09:29:53	部分凝血活酶时间	32.8	S	22-45	M	2014-09-16 11:02:48	*总胆固醇	5.92	mmol/l	3.6-5.17	H	2014-09-16 09:29:53	D二聚体	1309	ng/ml	0-115	H	2014-09-16 10:13:40	*葡萄糖	5.32	mmol/l	3.89-6.11	M	2014-09-16 09:29:53	C反应蛋白	22.75	mg/l	0-8	H	2014-09-16 09:29:53	凝血酶原时间(PT)	11.5	S	43023	M	2014-09-16 10:59:17
867	1000209860001	凝血酶原国际比值	1.07		0.7-1.3	M	2014-09-16 09:42:33	低密度脂蛋白	3.15	mmol/l	健康人群:1.8-3.36;心脑血管疾病危险人群:<2.59	M	2014-09-16 10:20:28	部分凝血活酶时间	22.3	S	22-45	M	2014-09-16 09:42:33	*总胆固醇	5.8	mmol/l	3.6-5.17	H	2014-09-16 10:20:28	D二聚体	110	ng/ml	0-115	M	2014-09-16 09:42:33	*葡萄糖	5.08	mmol/l	3.89-6.11	M	2014-09-16 10:20:28	C反应蛋白	2.27	mg/l	0-8	M	2014-09-16 10:20:28	凝血酶原时间(PT)	12.3	S	42992	M	2014-09-16 09:42:33
868	1000209865001	凝血酶原国际比值	0.83		0.7-1.3	M	2014-09-16 10:42:50	低密度脂蛋白	3.69	mmol/l	健康人群:1.8-3.36;心脑血管疾病危险人群:<2.59	M	2014-09-16 09:46:55	部分凝血活酶时间	29.4	S	22-45	M	2014-09-16 10:46:21	*总胆固醇	5.96	mmol/l	3.6-5.17	H	2014-09-16 09:46:55	D二聚体	306	ng/ml	0-115	H	2014-09-16 09:48:38	*葡萄糖	4.31	mmol/l	3.89-6.11	M	2014-09-16 09:46:55	C反应蛋白	2.14	mg/l	0-8	M	2014-09-16 09:46:55	凝血酶原时间(PT)	11.1	S	43023	M	2014-09-16 10:42:50
869	1000209878001	凝血酶原国际比值	0.93		0.7-1.3	M	2014-09-16 10:42:45	低密度脂蛋白	3.35	mmol/l	健康人群:1.8-3.36;心脑血管疾病危险人群:<2.59	M	2014-09-16 10:03:22	部分凝血活酶时间	33.8	S	22-45	M	2014-09-16 10:46:27	*总胆固醇	5.41	mmol/l	3.6-5.17	H	2014-09-16 10:03:22	D二聚体	254	ng/ml	0-115	H	2014-09-16 09:47:12	*葡萄糖	4.82	mmol/l	3.89-6.11	M	2014-09-16 10:03:22	C反应蛋白	14.92	mg/l	0-8	H	2014-09-16 10:03:22	凝血酶原时间(PT)	12.3	S	43023	M	2014-09-16 10:42:45
870	1000209880001	凝血酶原国际比值	1.13		0.7-1.3	M	2014-09-16 11:21:44	低密度脂蛋白	2.56	mmol/l	健康人群:1.8-3.36;心脑血管疾病危险人群:<2.59	M	2014-09-16 10:29:30	部分凝血活酶时间	35	S	22-45	M	2014-09-16 11:29:15	*总胆固醇	4.53	mmol/l	3.6-5.17	M	2014-09-16 10:29:30	D二聚体	30	ng/ml	0-115	M	2014-09-16 11:21:44	*葡萄糖	4.98	mmol/l	3.89-6.11	M	2014-09-16 10:29:30	C反应蛋白	2.02	mg/l	0-8	M	2014-09-16 10:29:30	凝血酶原时间(PT)	13	S	42992	M	2014-09-16 11:21:44
871	1000209888001	凝血酶原国际比值	1.13		0.7-1.3	M	2014-09-16 11:14:40	低密度脂蛋白	2.87	mmol/l	健康人群:1.8-3.36;心脑血管疾病危险人群:<2.59	M	2014-09-16 09:36:05	部分凝血活酶时间	22	S	22-45	M	2014-09-16 11:21:23	*总胆固醇	5.58	mmol/l	3.6-5.17	H	2014-09-16 09:36:05	D二聚体	110	ng/ml	0-115	M	2014-09-16 11:21:25	*葡萄糖	4.76	mmol/l	3.89-6.11	M	2014-09-16 09:36:05	C反应蛋白	4.1	mg/l	0-8	M	2014-09-16 09:46:22	凝血酶原时间(PT)	13	S	42992	M	2014-09-16 11:14:40
872	1000209921001	凝血酶原国际比值	0.84		0.7-1.3	M	2014-09-16 10:59:02	低密度脂蛋白	2.69	mmol/l	健康人群:1.8-3.36;心脑血管疾病危险人群:<2.59	M	2014-09-16 09:47:16	部分凝血活酶时间	32	S	22-45	M	2014-09-16 10:54:50	*总胆固醇	4.9	mmol/l	3.6-5.17	M	2014-09-16 09:47:16	D二聚体	39	ng/ml	0-115	M	2014-09-16 10:02:12	*葡萄糖	4.63	mmol/l	3.89-6.11	M	2014-09-16 09:47:16	C反应蛋白	5	mg/l	0-8	M	2014-09-16 09:47:16	凝血酶原时间(PT)	11.2	S	43023	M	2014-09-16 10:59:02
873	1000209930001	凝血酶原国际比值	1.06		0.7-1.3	M	2014-09-16 10:26:35	低密度脂蛋白	2.5	mmol/l	健康人群:1.8-3.36;心脑血管疾病危险人群:<2.59	M	2014-09-16 09:47:07	部分凝血活酶时间	34.1	S	22-45	M	2014-09-16 10:26:35	*总胆固醇	4.22	mmol/l	3.6-5.17	M	2014-09-16 09:47:07	D二聚体	110	ng/ml	0-115	M	2014-09-16 10:43:07	*葡萄糖	5.01	mmol/l	3.89-6.11	M	2014-09-16 09:47:07	C反应蛋白	2.57	mg/l	0-8	M	2014-09-17 09:57:01	凝血酶原时间(PT)	12.2	S	42992	M	2014-09-16 10:26:35
874	1000209931001	凝血酶原国际比值	1.02		0.7-1.3	M	2014-09-16 09:45:35	低密度脂蛋白	2.48	mmol/l	健康人群:1.8-3.36;心脑血管疾病危险人群:<2.59	M	2014-09-16 09:21:10	部分凝血活酶时间	21.1	S	22-45	L	2014-09-16 10:40:04	*总胆固醇	4.56	mmol/l	3.6-5.17	M	2014-09-16 09:21:10	D二聚体	100	ng/ml	0-115	M	2014-09-16 10:40:06	*葡萄糖	5.02	mmol/l	3.89-6.11	M	2014-09-16 09:21:10	C反应蛋白	5.71	mg/l	0-8	M	2014-09-16 09:21:10	凝血酶原时间(PT)	11.7	S	42992	M	2014-09-16 09:45:35
875	1000209940001	凝血酶原国际比值	1.25		0.7-1.3	M	2014-09-16 09:33:47	低密度脂蛋白	2.15	mmol/l	健康人群:1.8-3.36;心脑血管疾病危险人群:<2.59	M	2014-09-16 09:51:12	部分凝血活酶时间	33.2	S	22-45	M	2014-09-16 09:33:47	*总胆固醇	4.19	mmol/l	3.6-5.17	M	2014-09-16 09:51:12	D二聚体	14070	ng/ml	0-115	H	2014-09-16 09:33:47	*葡萄糖	6.14	mmol/l	3.89-6.11	H	2014-09-16 09:51:12	C反应蛋白	13.51	mg/l	0-8	H	2014-09-16 09:53:44	凝血酶原时间(PT)	14.4	S	42992	H	2014-09-16 09:33:47
876	1000209962001	凝血酶原国际比值	1.36		0.7-1.3	H	2014-09-17 10:12:50	低密度脂蛋白	2.51	mmol/l	健康人群:1.8-3.36;心脑血管疾病危险人群:<2.59	M	2014-09-17 09:57:06	部分凝血活酶时间	29.3	S	22-45	M	2014-09-17 10:12:50	*总胆固醇	4.14	mmol/l	3.6-5.17	M	2014-09-17 09:57:06	D二聚体	330	ng/ml	0-115	H	2014-09-17 10:12:50	*葡萄糖	10.28	mmol/l	3.89-6.11	H	2014-09-17 09:57:06	C反应蛋白	221.03	mg/l	0-8	H	2014-09-17 09:57:06	凝血酶原时间(PT)	15.7	S	42992	H	2014-09-17 10:12:50
877	1000209978001	凝血酶原国际比值	1.13		0.7-1.3	M	2014-09-16 14:08:23	低密度脂蛋白	2.46	mmol/l	健康人群:1.8-3.36;心脑血管疾病危险人群:<2.59	M	2014-09-16 13:02:45	部分凝血活酶时间	19.2	S	22-45	L	2014-09-16 14:08:23	*总胆固醇	5.2	mmol/l	3.6-5.17	H	2014-09-16 13:02:45	D二聚体	100	ng/ml	0-115	M	2014-09-16 14:08:23	*葡萄糖	4.9	mmol/l	3.89-6.11	M	2014-09-16 13:02:45	C反应蛋白	1	mg/l	0-8	M	2014-09-16 13:54:34	凝血酶原时间(PT)	13	S	42992	M	2014-09-16 14:08:23
878	1000209994001	凝血酶原国际比值	1.19		0.7-1.3	M	2014-09-17 09:34:10	低密度脂蛋白	4.65	mmol/l	健康人群:1.8-3.36;心脑血管疾病危险人群:<2.59	M	2014-09-17 09:01:16	部分凝血活酶时间	23.2	S	22-45	M	2014-09-17 09:34:10	*总胆固醇	7.87	mmol/l	3.6-5.17	H	2014-09-17 09:01:16	D二聚体	100	ng/ml	0-115	M	2014-09-17 09:34:10	*葡萄糖	6.18	mmol/l	3.89-6.11	H	2014-09-17 09:01:16	C反应蛋白	4.09	mg/l	0-8	M	2014-09-17 09:01:16	凝血酶原时间(PT)	13.7	S	42992	M	2014-09-17 09:34:10
879	1000210022001	凝血酶原国际比值	1.22		0.7-1.3	M	2014-09-16 14:16:06	低密度脂蛋白	3.76	mmol/l	健康人群:1.8-3.36;心脑血管疾病危险人群:<2.59	M	2014-09-16 13:46:48	部分凝血活酶时间	21.1	S	22-45	L	2014-09-16 14:16:06	*总胆固醇	7.1	mmol/l	3.6-5.17	H	2014-09-16 13:46:48	D二聚体	60	ng/ml	0-115	M	2014-09-16 14:16:06	*葡萄糖	4.4	mmol/l	3.89-6.11	M	2014-09-16 13:46:48	C反应蛋白	0.1	mg/l	0-8	M	2014-09-16 13:46:48	凝血酶原时间(PT)	14.1	S	42992	H	2014-09-16 14:16:06
880	1000210031001	凝血酶原国际比值	1.23		0.7-1.3	M	2014-09-17 10:47:29	低密度脂蛋白	4	mmol/l	健康人群:1.8-3.36;心脑血管疾病危险人群:<2.59	M	2014-09-17 08:49:32	部分凝血活酶时间	19.3	S	22-45	L	2014-09-17 10:47:29	*总胆固醇	6.54	mmol/l	3.6-5.17	H	2014-09-17 08:49:32	D二聚体	660	ng/ml	0-115	H	2014-09-17 10:47:29	*葡萄糖	6.74	mmol/l	3.89-6.11	H	2014-09-17 08:49:32	C反应蛋白	4.34	mg/l	0-8	M	2014-09-17 08:49:32	凝血酶原时间(PT)	14.2	S	42992	H	2014-09-17 10:47:29
881	1000210045001	凝血酶原国际比值	1.32		0.7-1.3	H	2014-09-17 10:39:01	低密度脂蛋白	2.11	mmol/l	健康人群:1.8-3.36;心脑血管疾病危险人群:<2.59	M	2014-09-17 09:04:16	部分凝血活酶时间	23.1	S	22-45	M	2014-09-17 10:39:01	*总胆固醇	4.29	mmol/l	3.6-5.17	M	2014-09-17 09:04:16	D二聚体	4410	ng/ml	0-115	H	2014-09-17 10:39:01	*葡萄糖	6.07	mmol/l	3.89-6.11	M	2014-09-17 09:04:16	C反应蛋白	80.71	mg/l	0-8	H	2014-09-17 09:04:16	凝血酶原时间(PT)	15.2	S	42992	H	2014-09-17 10:39:01
882	1000210046001	凝血酶原国际比值	1.15		0.7-1.3	M	2014-09-17 10:13:26	低密度脂蛋白	3.49	mmol/l	健康人群:1.8-3.36;心脑血管疾病危险人群:<2.59	M	2014-09-17 08:58:58	部分凝血活酶时间	23	S	22-45	M	2014-09-17 11:10:42	*总胆固醇	6.62	mmol/l	3.6-5.17	H	2014-09-17 08:58:58	D二聚体	330	ng/ml	0-115	H	2014-09-17 11:03:19	*葡萄糖	5.61	mmol/l	3.89-6.11	M	2014-09-17 08:58:58	C反应蛋白	3.73	mg/l	0-8	M	2014-09-17 08:58:58	凝血酶原时间(PT)	13.2	S	42992	M	2014-09-17 10:13:26
883	1000210084001	凝血酶原国际比值	1.15		0.7-1.3	M	2014-09-17 10:24:57	低密度脂蛋白	1.86	mmol/l	健康人群:1.8-3.36;心脑血管疾病危险人群:<2.59	M	2014-09-17 09:11:09	部分凝血活酶时间	40.7	S	22-45	M	2014-09-17 10:14:09	*总胆固醇	3.75	mmol/l	3.6-5.17	M	2014-09-17 09:11:09	D二聚体	2546	ng/ml	0-115	H	2014-09-17 09:55:44	*葡萄糖	3.99	mmol/l	3.89-6.11	M	2014-09-17 09:11:09	C反应蛋白	2.23	mg/l	0-8	M	2014-09-17 09:11:09	凝血酶原时间(PT)	14.8	S	43023	M	2014-09-17 10:24:57
884	1000210103001	凝血酶原国际比值	0.98		0.7-1.3	M	2014-09-18 09:45:56	低密度脂蛋白	1.77	mmol/l	健康人群:1.8-3.36;心脑血管疾病危险人群:<2.59	M	2014-09-18 09:37:54	部分凝血活酶时间	29.5	S	22-45	M	2014-09-18 09:45:56	*总胆固醇	3.64	mmol/l	3.6-5.17	M	2014-09-18 09:37:54	D二聚体	69	ng/ml	0-115	M	2014-09-18 10:19:37	*葡萄糖	4.12	mmol/l	3.89-6.11	M	2014-09-18 09:37:54	C反应蛋白	3.44	mg/l	0-8	M	2014-09-18 09:46:22	凝血酶原时间(PT)	11.3	S	42992	M	2014-09-18 09:45:56
885	1000210105001	凝血酶原国际比值	1.21		0.7-1.3	M	2014-09-17 11:25:13	低密度脂蛋白	2.96	mmol/l	健康人群:1.8-3.36;心脑血管疾病危险人群:<2.59	M	2014-09-17 11:27:04	部分凝血活酶时间	20.1	S	22-45	L	2014-09-17 11:25:13	*总胆固醇	4.55	mmol/l	3.6-5.17	M	2014-09-17 11:27:04	D二聚体	100	ng/ml	0-115	M	2014-09-17 13:50:19	*葡萄糖	5.19	mmol/l	3.89-6.11	M	2014-09-17 11:27:04	C反应蛋白	57.75	mg/l	0-8	H	2014-09-22 09:35:46	凝血酶原时间(PT)	14	S	42992	M	2014-09-17 11:25:13
886	1000210122001	凝血酶原国际比值	0.9		0.7-1.3	M	2014-09-18 10:16:54	低密度脂蛋白	1.89	mmol/l	健康人群:1.8-3.36;心脑血管疾病危险人群:<2.59	M	2014-09-18 08:55:50	部分凝血活酶时间	16.6	S	22-45	L	2014-09-18 10:16:54	*总胆固醇	4.97	mmol/l	3.6-5.17	M	2014-09-18 08:55:50	D二聚体	110	ng/ml	0-115	M	2014-09-18 10:16:54	*葡萄糖	5.13	mmol/l	3.89-6.11	M	2014-09-18 08:55:50	C反应蛋白	2.77	mg/l	0-8	M	2014-09-18 08:55:50	凝血酶原时间(PT)	10.3	S	42992	M	2014-09-18 10:16:54
887	1000210130001	凝血酶原国际比值	0.98		0.7-1.3	M	2014-09-18 10:10:42	低密度脂蛋白	3.38	mmol/l	健康人群:1.8-3.36;心脑血管疾病危险人群:<2.59	M	2014-09-18 09:03:55	部分凝血活酶时间	25.5	S	22-45	M	2014-09-18 10:10:42	*总胆固醇	5.62	mmol/l	3.6-5.17	H	2014-09-18 09:03:55	D二聚体	140	ng/ml	0-115	H	2014-09-18 10:10:42	*葡萄糖	4.41	mmol/l	3.89-6.11	M	2014-09-18 09:03:55	C反应蛋白	4.62	mg/l	0-8	M	2014-09-18 09:03:55	凝血酶原时间(PT)	11.3	S	42992	M	2014-09-18 10:10:42
888	1000210155001	凝血酶原国际比值	0.91		0.7-1.3	M	2014-09-18 10:12:17	低密度脂蛋白	3.27	mmol/l	健康人群:1.8-3.36;心脑血管疾病危险人群:<2.59	M	2014-09-18 09:24:04	部分凝血活酶时间	21.4	S	22-45	L	2014-09-18 10:12:17	*总胆固醇	7.39	mmol/l	3.6-5.17	H	2014-09-18 09:24:04	D二聚体	390	ng/ml	0-115	H	2014-09-18 10:12:17	*葡萄糖	4.27	mmol/l	3.89-6.11	M	2014-09-18 09:24:04	C反应蛋白	144.07	mg/l	0-8	H	2014-09-18 09:24:04	凝血酶原时间(PT)	10.5	S	42992	M	2014-09-18 10:12:17
889	1000210155002	凝血酶原国际比值	0.99		0.7-1.3	M	2014-10-15 11:33:18	低密度脂蛋白	3.9	mmol/l	健康人群:1.8-3.36;心脑血管疾病危险人群:<2.59	M	2014-10-15 09:26:45	部分凝血活酶时间	21.7	S	22-45	L	2014-10-15 11:33:18	*总胆固醇	7.55	mmol/l	3.6-5.17	H	2014-10-15 09:26:45	D二聚体	730	ng/ml	0-115	H	2014-10-15 11:33:18	*葡萄糖	4.81	mmol/l	3.89-6.11	M	2014-10-15 09:26:45	C反应蛋白	43.8	mg/l	0-8	H	2014-11-02 13:08:22	凝血酶原时间(PT)	11.4	S	42992	M	2014-10-15 11:33:18
890	1000210163001	凝血酶原国际比值	0.92		0.7-1.3	M	2014-09-18 09:41:26	低密度脂蛋白	2.06	mmol/l	健康人群:1.8-3.36;心脑血管疾病危险人群:<2.59	M	2014-09-18 09:03:53	部分凝血活酶时间	35.5	S	22-45	M	2014-09-18 09:36:55	*总胆固醇	3.6	mmol/l	3.6-5.17	M	2014-09-18 09:03:53	D二聚体	98	ng/ml	0-115	M	2014-11-25 09:31:09	*葡萄糖	5	mmol/l	3.89-6.11	M	2014-09-18 09:03:53	C反应蛋白	0.52	mg/l	0-8	M	2015-04-06 11:59:53	凝血酶原时间(PT)	12.2	S	43023	M	2014-09-18 09:41:26
891	1000210172002	凝血酶原国际比值	1.08		0.7-1.3	M	2014-11-04 09:44:25	低密度脂蛋白	2.07	mmol/l	健康人群:1.8-3.36;心脑血管疾病危险人群:<2.59	M	2014-11-04 09:48:24	部分凝血活酶时间	28.9	S	22-45	M	2014-11-04 09:44:25	*总胆固醇	3.48	mmol/l	3.6-5.17	L	2014-11-04 09:48:24	D二聚体	2180	ng/ml	0-115	H	2014-11-04 09:44:25	*葡萄糖	3.94	mmol/l	3.89-6.11	M	2014-11-04 09:48:24	C反应蛋白	0.59	mg/l	0-8	M	2014-11-04 09:48:24	凝血酶原时间(PT)	12.4	S	42992	M	2014-11-04 09:44:25
892	1000210188001	凝血酶原国际比值	0.97		0.7-1.3	M	2014-09-18 11:38:15	低密度脂蛋白	3.05	mmol/l	健康人群:1.8-3.36;心脑血管疾病危险人群:<2.59	M	2014-09-18 11:19:34	部分凝血活酶时间	18.7	S	22-45	L	2014-09-18 11:38:15	*总胆固醇	5.63	mmol/l	3.6-5.17	H	2014-09-18 11:19:34	D二聚体	140	ng/ml	0-115	H	2014-09-18 11:38:15	*葡萄糖	5.51	mmol/l	3.89-6.11	M	2014-09-18 11:19:34	C反应蛋白	7.9	mg/l	0-8	M	2014-09-18 11:19:34	凝血酶原时间(PT)	11.1	S	42992	M	2014-09-18 11:38:15
893	1000210197001	凝血酶原国际比值	0.98		0.7-1.3	M	2014-09-19 10:54:56	低密度脂蛋白	2.95	mmol/l	健康人群:1.8-3.36;心脑血管疾病危险人群:<2.59	M	2014-09-19 09:56:55	部分凝血活酶时间	25.7	S	22-45	M	2014-09-19 10:54:56	*总胆固醇	4.96	mmol/l	3.6-5.17	M	2014-09-19 09:56:55	D二聚体	180	ng/ml	0-115	H	2014-09-19 10:58:06	*葡萄糖	5.42	mmol/l	3.89-6.11	M	2014-09-19 09:56:55	C反应蛋白	2.49	mg/l	0-8	M	2014-09-19 10:39:41	凝血酶原时间(PT)	11.3	S	42992	M	2014-09-19 10:54:56
894	1000210204001	凝血酶原国际比值	0.84		0.7-1.3	M	2014-09-18 12:49:11	低密度脂蛋白	4.85	mmol/l	健康人群:1.8-3.36;心脑血管疾病危险人群:<2.59	M	2014-09-18 13:02:13	部分凝血活酶时间	29.4	S	22-45	M	2014-09-18 12:35:22	*总胆固醇	7.8	mmol/l	3.6-5.17	H	2014-09-18 13:02:13	D二聚体	127	ng/ml	0-115	H	2014-09-18 12:40:10	*葡萄糖	4.1	mmol/l	3.89-6.11	M	2014-09-18 13:02:13	C反应蛋白	2.5	mg/l	0-8	M	2014-09-18 13:02:13	凝血酶原时间(PT)	11.3	S	43023	M	2014-09-18 12:49:11
895	1000210209001	凝血酶原国际比值	1		0.7-1.3	M	2014-09-19 10:49:34	低密度脂蛋白	6.95	mmol/l	健康人群:1.8-3.36;心脑血管疾病危险人群:<2.59	M	2014-09-19 10:10:55	部分凝血活酶时间	28.1	S	22-45	M	2014-09-19 10:49:34	*总胆固醇	9.36	mmol/l	3.6-5.17	H	2014-09-19 10:10:55	D二聚体	80	ng/ml	0-115	M	2014-09-19 10:49:34	*葡萄糖	4.69	mmol/l	3.89-6.11	M	2014-09-19 10:10:55	C反应蛋白	2.01	mg/l	0-8	M	2014-09-19 10:41:58	凝血酶原时间(PT)	11.5	S	42992	M	2014-09-19 10:49:34
896	1000210211001	凝血酶原国际比值	1.09		0.7-1.3	M	2014-09-19 10:12:03	低密度脂蛋白	2.77	mmol/l	健康人群:1.8-3.36;心脑血管疾病危险人群:<2.59	M	2014-09-19 09:51:28	部分凝血活酶时间	27.2	S	22-45	M	2014-09-19 10:12:03	*总胆固醇	4.73	mmol/l	3.6-5.17	M	2014-09-19 09:51:28	D二聚体	100	ng/ml	0-115	M	2014-09-19 10:12:03	*葡萄糖	4.95	mmol/l	3.89-6.11	M	2014-09-19 09:51:28	C反应蛋白	2.66	mg/l	0-8	M	2014-09-19 10:39:32	凝血酶原时间(PT)	12.6	S	42992	M	2014-09-19 10:12:03
897	1000210212001	凝血酶原国际比值	0.94		0.7-1.3	M	2014-09-18 11:49:57	低密度脂蛋白	3.88	mmol/l	健康人群:1.8-3.36;心脑血管疾病危险人群:<2.59	M	2014-09-18 11:17:06	部分凝血活酶时间	18.7	S	22-45	L	2014-09-18 11:49:57	*总胆固醇	6.64	mmol/l	3.6-5.17	H	2014-09-18 11:17:06	D二聚体	40	ng/ml	0-115	M	2014-09-18 11:49:57	*葡萄糖	6.47	mmol/l	3.89-6.11	H	2014-09-18 11:17:06	C反应蛋白	2.73	mg/l	0-8	M	2014-09-18 11:17:06	凝血酶原时间(PT)	10.8	S	42992	M	2014-09-18 11:49:57
898	1000210213001	凝血酶原国际比值	1.03		0.7-1.3	M	2014-09-19 11:33:56	低密度脂蛋白	2.09	mmol/l	健康人群:1.8-3.36;心脑血管疾病危险人群:<2.59	M	2014-09-19 10:11:03	部分凝血活酶时间	23	S	22-45	M	2014-09-19 11:38:40	*总胆固醇	4.02	mmol/l	3.6-5.17	M	2014-09-19 10:11:03	D二聚体	290	ng/ml	0-115	H	2014-09-19 11:33:56	*葡萄糖	8.04	mmol/l	3.89-6.11	H	2014-09-19 10:11:03	C反应蛋白	67.9	mg/l	0-8	H	2014-09-19 10:42:13	凝血酶原时间(PT)	11.9	S	42992	M	2014-09-19 11:33:56
899	1000210213002	凝血酶原国际比值	1.13		0.7-1.3	M	2017-04-03 10:34:12	低密度脂蛋白	1.72	mmol/l	健康人群:1.8-3.36;心脑血管疾病危险人群:<2.59	M	2017-04-03 09:29:25	部分凝血活酶时间	34	S	20-40	M	2017-04-03 10:34:12	*总胆固醇	3.64	mmol/l	3.6-5.17	M	2017-04-03 09:29:25	D二聚体	2360	ng/ml	0-115	H	2017-04-03 11:31:32	*葡萄糖	6.73	mmol/l	3.89-6.11	H	2017-04-03 09:29:25	C反应蛋白	15.44	mg/l	0-8	H	2017-04-03 10:50:34	凝血酶原时间(PT)	13	S	42992	M	2017-04-03 10:34:12
900	1000210216001	凝血酶原国际比值	0.95		0.7-1.3	M	2014-09-19 11:26:43	低密度脂蛋白	2.97	mmol/l	健康人群:1.8-3.36;心脑血管疾病危险人群:<2.59	M	2014-09-19 11:03:32	部分凝血活酶时间	21.9	S	22-45	L	2014-09-19 11:39:39	*总胆固醇	5.62	mmol/l	3.6-5.17	H	2014-09-19 11:03:32	D二聚体	350	ng/ml	0-115	H	2014-09-19 11:26:43	*葡萄糖	5.89	mmol/l	3.89-6.11	M	2014-09-19 11:03:32	C反应蛋白	2.39	mg/l	0-8	M	2014-09-19 11:03:32	凝血酶原时间(PT)	10.9	S	42992	M	2014-09-19 11:26:43
901	1000210231001	凝血酶原国际比值	1.05		0.7-1.3	M	2014-09-19 10:51:50	低密度脂蛋白	4.76	mmol/l	健康人群:1.8-3.36;心脑血管疾病危险人群:<2.59	M	2014-09-19 10:06:03	部分凝血活酶时间	25.8	S	22-45	M	2014-09-19 10:51:50	*总胆固醇	8.4	mmol/l	3.6-5.17	H	2014-09-19 10:06:03	D二聚体	1250	ng/ml	0-115	H	2014-09-19 10:51:50	*葡萄糖	5.75	mmol/l	3.89-6.11	M	2014-09-19 10:06:03	C反应蛋白	11.42	mg/l	0-8	H	2014-09-19 10:41:15	凝血酶原时间(PT)	12.1	S	42992	M	2014-09-19 10:51:50
902	1000210232001	凝血酶原国际比值	1.08		0.7-1.3	M	2014-09-19 11:53:44	低密度脂蛋白	2.22	mmol/l	健康人群:1.8-3.36;心脑血管疾病危险人群:<2.59	M	2014-09-19 11:40:53	部分凝血活酶时间	22.6	S	22-45	M	2014-09-19 11:54:46	*总胆固醇	4.25	mmol/l	3.6-5.17	M	2014-09-19 11:40:53	D二聚体	70	ng/ml	0-115	M	2014-09-19 11:54:55	*葡萄糖	4.82	mmol/l	3.89-6.11	M	2014-09-19 11:40:53	C反应蛋白	3	mg/l	0-8	M	2014-09-19 11:40:53	凝血酶原时间(PT)	12.4	S	42992	M	2014-09-19 11:53:44
903	1000210235001	凝血酶原国际比值	1.12		0.7-1.3	M	2014-09-19 11:46:23	低密度脂蛋白	2.34	mmol/l	健康人群:1.8-3.36;心脑血管疾病危险人群:<2.59	M	2014-09-19 11:38:02	部分凝血活酶时间	27.6	S	22-45	M	2014-09-19 11:46:23	*总胆固醇	4.26	mmol/l	3.6-5.17	M	2014-09-19 11:38:02	D二聚体	30	ng/ml	0-115	M	2014-09-19 11:46:23	*葡萄糖	4.47	mmol/l	3.89-6.11	M	2014-09-19 11:38:02	C反应蛋白	1.7	mg/l	0-8	M	2014-09-19 11:40:05	凝血酶原时间(PT)	12.9	S	42992	M	2014-09-19 11:46:23
904	1000210240001	凝血酶原国际比值	1.03		0.7-1.3	M	2014-09-19 11:15:05	低密度脂蛋白	2.99	mmol/l	健康人群:1.8-3.36;心脑血管疾病危险人群:<2.59	M	2014-09-19 09:14:07	部分凝血活酶时间	21.4	S	22-45	L	2014-09-19 11:16:40	*总胆固醇	4.95	mmol/l	3.6-5.17	M	2014-09-19 09:14:07	D二聚体	110	ng/ml	0-115	M	2014-09-19 11:16:44	*葡萄糖	5.54	mmol/l	3.89-6.11	M	2014-09-19 09:14:07	C反应蛋白	3.38	mg/l	0-8	M	2014-09-19 10:39:11	凝血酶原时间(PT)	11.8	S	42992	M	2014-09-19 11:15:05
905	1000210241001	凝血酶原国际比值	1.04		0.7-1.3	M	2014-09-19 10:53:00	低密度脂蛋白	3.81	mmol/l	健康人群:1.8-3.36;心脑血管疾病危险人群:<2.59	M	2014-09-19 09:58:42	部分凝血活酶时间	25	S	22-45	M	2014-09-19 10:53:00	*总胆固醇	5.82	mmol/l	3.6-5.17	H	2014-09-19 09:58:42	D二聚体	120	ng/ml	0-115	H	2014-09-19 10:57:55	*葡萄糖	5.3	mmol/l	3.89-6.11	M	2014-09-19 09:58:42	C反应蛋白	3.74	mg/l	0-8	M	2014-09-19 10:41:12	凝血酶原时间(PT)	12	S	42992	M	2014-09-19 10:53:00
906	1000210250001	凝血酶原国际比值	1.19		0.7-1.3	M	2014-09-19 10:18:09	低密度脂蛋白	2.04	mmol/l	健康人群:1.8-3.36;心脑血管疾病危险人群:<2.59	M	2014-09-19 09:47:47	部分凝血活酶时间	30.5	S	22-45	M	2014-09-19 10:18:09	*总胆固醇	3.46	mmol/l	3.6-5.17	L	2014-09-19 09:47:47	D二聚体	120	ng/ml	0-115	H	2014-09-19 10:52:49	*葡萄糖	5.62	mmol/l	3.89-6.11	M	2014-09-19 09:47:47	C反应蛋白	46.23	mg/l	0-8	H	2014-09-22 10:42:05	凝血酶原时间(PT)	13.7	S	42992	M	2014-09-19 10:18:09
907	1000210266001	凝血酶原国际比值	1.05		0.7-1.3	M	2014-09-19 10:02:46	低密度脂蛋白	2.43	mmol/l	健康人群:1.8-3.36;心脑血管疾病危险人群:<2.59	M	2014-09-19 09:22:28	部分凝血活酶时间	22.9	S	22-45	M	2014-09-19 10:02:46	*总胆固醇	5	mmol/l	3.6-5.17	M	2014-09-19 09:22:28	D二聚体	160	ng/ml	0-115	H	2014-09-19 10:50:46	*葡萄糖	5.15	mmol/l	3.89-6.11	M	2014-09-19 09:22:28	C反应蛋白	4.47	mg/l	0-8	M	2014-09-19 10:38:47	凝血酶原时间(PT)	12.1	S	42992	M	2014-09-19 10:02:46
908	1000210295001	凝血酶原国际比值	1		0.7-1.3	M	2014-09-20 10:17:09	低密度脂蛋白	1.75	mmol/l	健康人群:1.8-3.36;心脑血管疾病危险人群:<2.59	M	2014-09-20 09:11:36	部分凝血活酶时间	24.3	S	22-45	M	2014-09-20 10:17:09	*总胆固醇	3.66	mmol/l	3.6-5.17	M	2014-09-20 09:11:36	D二聚体	330	ng/ml	0-115	H	2014-09-20 11:29:24	*葡萄糖	6.41	mmol/l	3.89-6.11	H	2014-09-20 09:11:36	C反应蛋白	4.06	mg/l	0-8	M	2014-09-20 08:39:24	凝血酶原时间(PT)	11.5	S	42992	M	2014-09-20 10:17:09
909	1000210328001	凝血酶原国际比值	1		0.7-1.3	M	2014-09-25 09:51:39	低密度脂蛋白	3.88	mmol/l	健康人群:1.8-3.36;心脑血管疾病危险人群:<2.59	M	2014-09-25 09:27:04	部分凝血活酶时间	22	S	22-45	M	2014-09-25 09:51:39	*总胆固醇	5.63	mmol/l	3.6-5.17	H	2014-09-25 09:27:04	D二聚体	110	ng/ml	0-115	M	2014-09-25 11:33:35	*葡萄糖	4.91	mmol/l	3.89-6.11	M	2014-09-25 09:27:04	C反应蛋白	1.94	mg/l	0-8	M	2014-09-25 09:27:04	凝血酶原时间(PT)	11.5	S	42992	M	2014-09-25 09:51:39
910	1000210330002	凝血酶原国际比值	1.19		0.7-1.3	M	2014-10-04 11:07:02	低密度脂蛋白	2.45	mmol/l	健康人群:1.8-3.36;心脑血管疾病危险人群:<2.59	M	2014-10-04 10:03:37	部分凝血活酶时间	23.8	S	22-45	M	2014-10-04 11:07:02	*总胆固醇	4.48	mmol/l	3.6-5.17	M	2014-10-04 10:03:37	D二聚体	80	ng/ml	0-115	M	2014-10-04 11:18:10	*葡萄糖	4.79	mmol/l	3.89-6.11	M	2014-10-04 10:03:37	C反应蛋白	46.5	mg/l	0-8	H	2014-10-19 09:29:35	凝血酶原时间(PT)	13.7	S	42992	M	2014-10-04 11:07:02
911	1000210354001	凝血酶原国际比值	0.96		0.7-1.3	M	2014-09-20 10:57:02	低密度脂蛋白	2.55	mmol/l	健康人群:1.8-3.36;心脑血管疾病危险人群:<2.59	M	2014-09-20 09:09:49	部分凝血活酶时间	23.4	S	22-45	M	2014-09-20 10:57:02	*总胆固醇	5.64	mmol/l	3.6-5.17	H	2014-09-20 09:09:49	D二聚体	70	ng/ml	0-115	M	2014-09-20 10:57:02	*葡萄糖	4.82	mmol/l	3.89-6.11	M	2014-09-20 09:09:49	C反应蛋白	29.04	mg/l	0-8	H	2014-09-20 09:10:33	凝血酶原时间(PT)	11	S	42992	M	2014-09-20 10:57:02
912	1000210367001	凝血酶原国际比值	0.94		0.7-1.3	M	2014-09-20 09:30:46	低密度脂蛋白	3.58	mmol/l	健康人群:1.8-3.36;心脑血管疾病危险人群:<2.59	M	2014-09-20 09:25:37	部分凝血活酶时间	32.1	S	22-45	M	2014-09-20 09:30:46	*总胆固醇	5.99	mmol/l	3.6-5.17	H	2014-09-20 09:25:37	D二聚体	77	ng/ml	0-115	M	2014-09-20 09:35:41	*葡萄糖	4.49	mmol/l	3.89-6.11	M	2014-09-20 09:25:37	C反应蛋白	0.5	mg/l	0-8	M	2014-09-21 09:38:08	凝血酶原时间(PT)	12.4	S	43023	M	2014-09-20 09:30:46
913	1000210369001	凝血酶原国际比值	1		0.7-1.3	M	2014-09-20 10:02:52	低密度脂蛋白	2.46	mmol/l	健康人群:1.8-3.36;心脑血管疾病危险人群:<2.59	M	2014-09-20 09:49:18	部分凝血活酶时间	25.6	S	22-45	M	2014-09-20 10:02:52	*总胆固醇	4.32	mmol/l	3.6-5.17	M	2014-09-20 09:49:18	D二聚体	490	ng/ml	0-115	H	2014-09-20 10:02:52	*葡萄糖	5.87	mmol/l	3.89-6.11	M	2014-09-20 09:49:18	C反应蛋白	24.93	mg/l	0-8	H	2014-09-20 09:49:18	凝血酶原时间(PT)	11.5	S	42992	M	2014-09-20 10:02:52
914	1000210372001	凝血酶原国际比值	1.15		0.7-1.3	M	2014-09-25 09:45:07	低密度脂蛋白	1.72	mmol/l	健康人群:1.8-3.36;心脑血管疾病危险人群:<2.59	M	2014-09-25 09:40:25	部分凝血活酶时间	29.8	S	22-45	M	2014-09-25 09:45:07	*总胆固醇	2.79	mmol/l	3.6-5.17	L	2014-09-25 09:40:25	D二聚体	8120	ng/ml	0-115	H	2014-09-25 09:45:07	*葡萄糖	5.48	mmol/l	3.89-6.11	M	2014-09-25 09:40:25	C反应蛋白	3.36	mg/l	0-8	M	2014-10-13 11:55:00	凝血酶原时间(PT)	13.2	S	42992	M	2014-09-25 09:45:07
915	1000210385001	凝血酶原国际比值	0.97		0.7-1.3	M	2014-09-20 10:54:27	低密度脂蛋白	2.09	mmol/l	健康人群:1.8-3.36;心脑血管疾病危险人群:<2.59	M	2014-09-20 09:11:15	部分凝血活酶时间	33.9	S	22-45	M	2014-09-20 10:33:55	*总胆固醇	4.15	mmol/l	3.6-5.17	M	2014-09-20 09:11:15	D二聚体	1258	ng/ml	0-115	H	2014-09-20 09:45:35	*葡萄糖	5.34	mmol/l	3.89-6.11	M	2014-09-20 09:11:15	C反应蛋白	7.68	mg/l	0-8	M	2014-09-20 09:11:15	凝血酶原时间(PT)	12.8	S	43023	M	2014-09-20 10:54:27
916	1000210392001	凝血酶原国际比值	0.94		0.7-1.3	M	2014-09-20 11:10:53	低密度脂蛋白	3.67	mmol/l	健康人群:1.8-3.36;心脑血管疾病危险人群:<2.59	M	2014-09-20 09:49:52	部分凝血活酶时间	33	S	22-45	M	2014-09-20 11:14:30	*总胆固醇	6.42	mmol/l	3.6-5.17	H	2014-09-20 09:49:52	D二聚体	4116	ng/ml	0-115	H	2014-09-20 10:00:49	*葡萄糖	5.26	mmol/l	3.89-6.11	M	2014-09-20 09:49:52	C反应蛋白	57.76	mg/l	0-8	H	2014-10-03 10:28:35	凝血酶原时间(PT)	12.4	S	43023	M	2014-09-20 11:10:53
917	1000210457001	凝血酶原国际比值	0.97		0.7-1.3	M	2014-09-22 09:52:20	低密度脂蛋白	2.09	mmol/l	健康人群:1.8-3.36;心脑血管疾病危险人群:<2.59	M	2014-09-22 09:58:26	部分凝血活酶时间	22.7	S	22-45	M	2014-09-22 10:43:05	*总胆固醇	5.18	mmol/l	3.6-5.17	H	2014-09-22 09:58:26	D二聚体	80	ng/ml	0-115	M	2014-09-22 09:52:20	*葡萄糖	5.88	mmol/l	3.89-6.11	M	2014-09-22 09:58:26	C反应蛋白	2.01	mg/l	0-8	M	2014-09-22 09:58:35	凝血酶原时间(PT)	11.1	S	42992	M	2014-09-22 09:52:20
918	1000210459001	凝血酶原国际比值	1		0.7-1.3	M	2014-09-22 10:06:56	低密度脂蛋白	2.02	mmol/l	健康人群:1.8-3.36;心脑血管疾病危险人群:<2.59	M	2014-09-22 09:58:56	部分凝血活酶时间	24.2	S	22-45	M	2014-09-22 10:06:56	*总胆固醇	4	mmol/l	3.6-5.17	M	2014-09-22 09:58:56	D二聚体	70	ng/ml	0-115	M	2014-09-22 10:06:56	*葡萄糖	4.86	mmol/l	3.89-6.11	M	2014-09-22 09:58:56	C反应蛋白	1.82	mg/l	0-8	M	2014-09-22 09:58:56	凝血酶原时间(PT)	11.5	S	42992	M	2014-09-22 10:06:56
919	1000210472001	凝血酶原国际比值	0.94		0.7-1.3	M	2014-09-22 09:46:52	低密度脂蛋白	1.5	mmol/l	健康人群:1.8-3.36;心脑血管疾病危险人群:<2.59	M	2014-09-22 09:59:30	部分凝血活酶时间	37	S	22-45	M	2014-09-22 09:32:47	*总胆固醇	3.42	mmol/l	3.6-5.17	L	2014-09-22 09:59:30	D二聚体	4949	ng/ml	0-115	H	2014-09-22 09:35:13	*葡萄糖	9.67	mmol/l	3.89-6.11	H	2014-09-22 09:59:30	C反应蛋白	142.4	mg/l	0-8	H	2014-09-29 10:58:52	凝血酶原时间(PT)	12.4	S	43023	M	2014-09-22 09:46:52
920	1000210475001	凝血酶原国际比值	1.16		0.7-1.3	M	2014-09-22 09:42:34	低密度脂蛋白	2.37	mmol/l	健康人群:1.8-3.36;心脑血管疾病危险人群:<2.59	M	2014-09-22 09:58:35	部分凝血活酶时间	21.1	S	22-45	L	2014-09-22 10:42:43	*总胆固醇	4.59	mmol/l	3.6-5.17	M	2014-09-22 09:58:35	D二聚体	640	ng/ml	0-115	H	2014-09-22 09:42:34	*葡萄糖	5.83	mmol/l	3.89-6.11	M	2014-09-22 09:58:35	C反应蛋白	1.01	mg/l	0-8	M	2014-10-22 11:30:27	凝血酶原时间(PT)	13.4	S	42992	M	2014-09-22 09:42:34
921	1000210497001	凝血酶原国际比值	1.19		0.7-1.3	M	2014-09-22 09:53:16	低密度脂蛋白	2.91	mmol/l	健康人群:1.8-3.36;心脑血管疾病危险人群:<2.59	M	2014-09-22 09:59:32	部分凝血活酶时间	30.9	S	22-45	M	2014-09-22 09:53:16	*总胆固醇	4.46	mmol/l	3.6-5.17	M	2014-09-22 09:59:32	D二聚体	27530	ng/ml	0-115	H	2014-09-22 09:53:16	*葡萄糖	5.75	mmol/l	3.89-6.11	M	2014-09-22 09:59:32	C反应蛋白	8.52	mg/l	0-8	H	2014-09-22 09:59:32	凝血酶原时间(PT)	13.7	S	42992	M	2014-09-22 09:53:16
922	1000210504001	凝血酶原国际比值	1.03		0.7-1.3	M	2014-09-22 10:37:19	低密度脂蛋白	2.69	mmol/l	健康人群:1.8-3.36;心脑血管疾病危险人群:<2.59	M	2014-09-22 10:15:55	部分凝血活酶时间	22.4	S	22-45	M	2014-09-22 10:37:19	*总胆固醇	5.15	mmol/l	3.6-5.17	M	2014-09-22 10:15:55	D二聚体	70	ng/ml	0-115	M	2014-09-22 10:37:19	*葡萄糖	5.61	mmol/l	3.89-6.11	M	2014-09-22 10:15:55	C反应蛋白	1.41	mg/l	0-8	M	2014-09-22 10:41:38	凝血酶原时间(PT)	11.9	S	42992	M	2014-09-22 10:37:19
923	1000210508001	凝血酶原国际比值	0.97		0.7-1.3	M	2014-09-22 11:44:15	低密度脂蛋白	4.08	mmol/l	健康人群:1.8-3.36;心脑血管疾病危险人群:<2.59	M	2014-09-22 11:40:40	部分凝血活酶时间	22.9	S	22-45	M	2014-09-22 11:44:15	*总胆固醇	7.18	mmol/l	3.6-5.17	H	2014-09-22 11:40:40	D二聚体	160	ng/ml	0-115	H	2014-09-22 11:44:15	*葡萄糖	5.12	mmol/l	3.89-6.11	M	2014-09-22 11:40:40	C反应蛋白	2.13	mg/l	0-8	M	2014-09-22 11:40:40	凝血酶原时间(PT)	11.1	S	42992	M	2014-09-22 11:44:15
924	1000210508002	凝血酶原国际比值	0.87		0.7-1.3	M	2015-03-13 11:46:32	低密度脂蛋白	4.8	mmol/l	健康人群:1.8-3.36;心脑血管疾病危险人群:<2.59	M	2015-03-13 12:37:32	部分凝血活酶时间	24.7	S	22-45	M	2015-03-13 11:46:32	*总胆固醇	7.98	mmol/l	3.6-5.17	H	2015-03-13 12:37:32	D二聚体	960	ng/ml	0-115	H	2015-03-13 11:46:32	*葡萄糖	5.91	mmol/l	3.89-6.11	M	2015-03-13 12:37:32	C反应蛋白	2.25	mg/l	0-8	M	2015-03-13 12:37:32	凝血酶原时间(PT)	10	S	42992	M	2015-03-13 11:46:32
925	1000210512001	凝血酶原国际比值	1.03		0.7-1.3	M	2014-09-23 11:11:04	低密度脂蛋白	1.95	mmol/l	健康人群:1.8-3.36;心脑血管疾病危险人群:<2.59	M	2014-09-23 09:39:43	部分凝血活酶时间	35.2	S	22-45	M	2014-09-23 11:12:39	*总胆固醇	4.24	mmol/l	3.6-5.17	M	2014-09-23 09:39:43	D二聚体	238	ng/ml	0-115	H	2014-09-23 10:17:44	*葡萄糖	5.79	mmol/l	3.89-6.11	M	2014-09-23 09:39:43	C反应蛋白	4.54	mg/l	0-8	M	2014-09-23 09:39:43	凝血酶原时间(PT)	13.4	S	43023	M	2014-09-23 11:11:04
926	1000210513001	凝血酶原国际比值	0.84		0.7-1.3	M	2014-09-23 10:39:51	低密度脂蛋白	2.75	mmol/l	健康人群:1.8-3.36;心脑血管疾病危险人群:<2.59	M	2014-09-23 10:07:00	部分凝血活酶时间	23.3	S	22-45	M	2014-09-23 11:13:08	*总胆固醇	5.95	mmol/l	3.6-5.17	H	2014-09-23 10:07:00	D二聚体	210	ng/ml	0-115	H	2014-09-23 11:29:12	*葡萄糖	3.82	mmol/l	3.89-6.11	L	2014-09-23 10:07:00	C反应蛋白	2.26	mg/l	0-8	M	2014-09-23 10:07:00	凝血酶原时间(PT)	9.7	S	42992	M	2014-09-23 10:39:51
927	1000210514001	凝血酶原国际比值	1		0.7-1.3	M	2014-09-22 11:37:43	低密度脂蛋白	2.91	mmol/l	健康人群:1.8-3.36;心脑血管疾病危险人群:<2.59	M	2014-09-22 11:21:27	部分凝血活酶时间	22.7	S	22-45	M	2014-09-22 11:37:43	*总胆固醇	5.51	mmol/l	3.6-5.17	H	2014-09-22 11:21:27	D二聚体	110	ng/ml	0-115	M	2014-09-22 11:37:43	*葡萄糖	5.31	mmol/l	3.89-6.11	M	2014-09-22 11:21:27	C反应蛋白	1.9	mg/l	0-8	M	2014-09-22 11:21:27	凝血酶原时间(PT)	11.5	S	42992	M	2014-09-22 11:37:43
928	1000210514002	凝血酶原国际比值	0.93		0.7-1.3	M	2015-09-21 12:04:28	低密度脂蛋白	3.41	mmol/l	健康人群:1.8-3.36;心脑血管疾病危险人群:<2.59	M	2015-09-21 11:35:28	部分凝血活酶时间	26.9	S	22-45	M	2015-09-21 12:04:28	*总胆固醇	6.29	mmol/l	3.6-5.17	H	2015-09-21 11:35:28	D二聚体	20	ng/ml	0-115	M	2015-09-21 12:04:28	*葡萄糖	4.91	mmol/l	3.89-6.11	M	2015-09-21 11:35:28	C反应蛋白	0.45	mg/l	0-8	M	2015-09-21 11:35:28	凝血酶原时间(PT)	10.7	S	42992	M	2015-09-21 12:04:28
929	1000210530001	凝血酶原国际比值	1.11		0.7-1.3	M	2014-09-26 10:52:25	低密度脂蛋白	1.28	mmol/l	健康人群:1.8-3.36;心脑血管疾病危险人群:<2.59	M	2014-09-26 11:03:21	部分凝血活酶时间	33.8	S	22-45	M	2014-09-26 10:52:25	*总胆固醇	3.37	mmol/l	3.6-5.17	L	2014-09-26 11:03:21	D二聚体	110	ng/ml	0-115	M	2014-09-26 11:18:45	*葡萄糖	5.31	mmol/l	3.89-6.11	M	2014-09-26 11:03:21	C反应蛋白	13.01	mg/l	0-8	H	2014-10-03 09:09:44	凝血酶原时间(PT)	12.8	S	42992	M	2014-09-26 10:52:25
930	1000210544001	凝血酶原国际比值	0.95		0.7-1.3	M	2014-09-23 09:13:25	低密度脂蛋白	2.8	mmol/l	健康人群:1.8-3.36;心脑血管疾病危险人群:<2.59	M	2014-09-23 09:38:11	部分凝血活酶时间	30.2	S	22-45	M	2014-09-23 09:13:25	*总胆固醇	5.44	mmol/l	3.6-5.17	H	2014-09-23 09:38:11	D二聚体	60	ng/ml	0-115	M	2014-09-23 09:13:25	*葡萄糖	5.7	mmol/l	3.89-6.11	M	2014-09-23 09:38:11	C反应蛋白	3.16	mg/l	0-8	M	2014-09-23 09:38:19	凝血酶原时间(PT)	10.9	S	42992	M	2014-09-23 09:13:25
931	1000210582001	凝血酶原国际比值	0.91		0.7-1.3	M	2014-09-23 10:09:56	低密度脂蛋白	3.22	mmol/l	健康人群:1.8-3.36;心脑血管疾病危险人群:<2.59	M	2014-09-23 10:06:40	部分凝血活酶时间	24.8	S	22-45	M	2014-09-23 10:09:56	*总胆固醇	5.61	mmol/l	3.6-5.17	H	2014-09-23 10:06:40	D二聚体	70	ng/ml	0-115	M	2014-09-23 10:09:56	*葡萄糖	4.68	mmol/l	3.89-6.11	M	2014-09-23 10:06:40	C反应蛋白	2.09	mg/l	0-8	M	2014-09-23 10:06:40	凝血酶原时间(PT)	10.4	S	42992	M	2014-09-23 10:09:56
932	1000210589002	凝血酶原国际比值	1.01		0.7-1.3	M	2014-11-10 10:01:20	低密度脂蛋白	2.62	mmol/l	健康人群:1.8-3.36;心脑血管疾病危险人群:<2.59	M	2014-11-10 09:11:35	部分凝血活酶时间	26.8	S	22-45	M	2014-11-10 10:01:20	*总胆固醇	4.9	mmol/l	3.6-5.17	M	2014-11-10 09:11:35	D二聚体	250	ng/ml	0-115	H	2014-11-10 10:01:20	*葡萄糖	4.52	mmol/l	3.89-6.11	M	2014-11-10 09:11:35	C反应蛋白	13.81	mg/l	0-8	H	2014-11-10 09:11:35	凝血酶原时间(PT)	11.6	S	42992	M	2014-11-10 10:01:20
933	1000210596001	凝血酶原国际比值	0.94		0.7-1.3	M	2014-09-23 11:29:56	低密度脂蛋白	2.73	mmol/l	健康人群:1.8-3.36;心脑血管疾病危险人群:<2.59	M	2014-09-23 10:07:11	部分凝血活酶时间	22.7	S	22-45	M	2014-09-23 11:30:51	*总胆固醇	4.87	mmol/l	3.6-5.17	M	2014-09-23 10:07:11	D二聚体	1740	ng/ml	0-115	H	2014-09-23 11:29:56	*葡萄糖	4.42	mmol/l	3.89-6.11	M	2014-09-23 10:07:11	C反应蛋白	3.34	mg/l	0-8	M	2014-09-23 10:07:11	凝血酶原时间(PT)	10.8	S	42992	M	2014-09-23 11:29:56
934	1000210618001	凝血酶原国际比值	1.09		0.7-1.3	M	2014-09-23 11:01:14	低密度脂蛋白	1.2	mmol/l	健康人群:1.8-3.36;心脑血管疾病危险人群:<2.59	M	2014-09-23 08:45:45	部分凝血活酶时间	33.6	S	22-45	M	2014-09-23 11:01:14	*总胆固醇	2.22	mmol/l	3.6-5.17	L	2014-09-23 08:45:45	D二聚体	840	ng/ml	0-115	H	2014-09-23 11:26:40	*葡萄糖	7.38	mmol/l	3.89-6.11	H	2014-09-23 08:45:45	C反应蛋白	24.31	mg/l	0-8	H	2014-09-27 10:17:39	凝血酶原时间(PT)	12.5	S	42992	M	2014-09-23 11:01:14
935	1000210639001	凝血酶原国际比值	1.42		0.7-1.3	H	2014-09-23 10:16:52	低密度脂蛋白	0.95	mmol/l	健康人群:1.8-3.36;心脑血管疾病危险人群:<2.59	M	2014-09-23 10:06:56	部分凝血活酶时间	29.6	S	22-45	M	2014-09-23 10:16:52	*总胆固醇	1.81	mmol/l	3.6-5.17	L	2014-09-23 10:06:56	D二聚体	120	ng/ml	0-115	H	2014-09-23 11:12:15	*葡萄糖	12.31	mmol/l	3.89-6.11	H	2014-09-23 10:06:56	C反应蛋白	216.79	mg/l	0-8	H	2014-09-23 10:06:56	凝血酶原时间(PT)	16.4	S	42992	H	2014-09-23 10:16:52
936	1000210659001	凝血酶原国际比值	0.97		0.7-1.3	M	2014-09-23 10:29:54	低密度脂蛋白	1.82	mmol/l	健康人群:1.8-3.36;心脑血管疾病危险人群:<2.59	M	2014-09-23 10:06:37	部分凝血活酶时间	32.9	S	22-45	M	2014-09-23 10:29:54	*总胆固醇	5.08	mmol/l	3.6-5.17	M	2014-09-23 10:06:37	D二聚体	4090	ng/ml	0-115	H	2014-09-23 10:29:54	*葡萄糖	4.6	mmol/l	3.89-6.11	M	2014-09-23 10:06:37	C反应蛋白	5.62	mg/l	0-8	M	2014-09-23 10:06:37	凝血酶原时间(PT)	11.1	S	42992	M	2014-09-23 10:29:54
937	1000210663001	凝血酶原国际比值	0.94		0.7-1.3	M	2014-09-23 10:42:47	低密度脂蛋白	1.9	mmol/l	健康人群:1.8-3.36;心脑血管疾病危险人群:<2.59	M	2014-09-23 09:47:17	部分凝血活酶时间	22.4	S	22-45	M	2014-09-23 11:13:21	*总胆固醇	3.62	mmol/l	3.6-5.17	M	2014-09-23 09:47:17	D二聚体	360	ng/ml	0-115	H	2014-09-23 11:20:07	*葡萄糖	5.9	mmol/l	3.89-6.11	M	2014-09-23 09:47:17	C反应蛋白	11.21	mg/l	0-8	H	2014-09-23 09:47:17	凝血酶原时间(PT)	10.8	S	42992	M	2014-09-23 10:42:47
938	1000210665001	凝血酶原国际比值	1.04		0.7-1.3	M	2014-09-23 10:29:53	低密度脂蛋白	3.39	mmol/l	健康人群:1.8-3.36;心脑血管疾病危险人群:<2.59	M	2014-09-23 09:08:04	部分凝血活酶时间	29	S	22-45	M	2014-09-23 10:29:53	*总胆固醇	5.06	mmol/l	3.6-5.17	M	2014-09-23 09:08:04	D二聚体	6640	ng/ml	0-115	H	2014-09-23 10:29:53	*葡萄糖	5.45	mmol/l	3.89-6.11	M	2014-09-23 09:08:04	C反应蛋白	51.49	mg/l	0-8	H	2014-09-29 10:45:07	凝血酶原时间(PT)	12	S	42992	M	2014-09-23 10:29:53
939	1000210677002	凝血酶原国际比值	1		0.7-1.3	M	2014-09-24 11:07:13	低密度脂蛋白	2.18	mmol/l	健康人群:1.8-3.36;心脑血管疾病危险人群:<2.59	M	2014-09-24 09:43:24	部分凝血活酶时间	25.1	S	22-45	M	2014-09-24 11:07:13	*总胆固醇	3.76	mmol/l	3.6-5.17	M	2014-09-24 09:43:24	D二聚体	5040	ng/ml	0-115	H	2014-09-24 11:07:13	*葡萄糖	4.3	mmol/l	3.89-6.11	M	2014-09-24 09:43:24	C反应蛋白	61.61	mg/l	0-8	H	2014-09-24 08:47:04	凝血酶原时间(PT)	11.5	S	42992	M	2014-09-24 11:07:13
940	1000210680001	凝血酶原国际比值	0.82		0.7-1.3	M	2014-09-24 11:29:09	低密度脂蛋白	3.41	mmol/l	健康人群:1.8-3.36;心脑血管疾病危险人群:<2.59	M	2014-09-24 10:01:53	部分凝血活酶时间	34	S	22-45	M	2014-09-24 11:15:52	*总胆固醇	6.98	mmol/l	3.6-5.17	H	2014-09-24 10:01:53	D二聚体	133	ng/ml	0-115	H	2014-09-24 10:44:34	*葡萄糖	5.18	mmol/l	3.89-6.11	M	2014-09-24 10:01:53	C反应蛋白	1.59	mg/l	0-8	M	2014-09-24 10:01:53	凝血酶原时间(PT)	11	S	43023	M	2014-09-24 11:29:09
941	1000210688001	凝血酶原国际比值	0.81		0.7-1.3	M	2014-09-23 12:05:47	低密度脂蛋白	3.96	mmol/l	健康人群:1.8-3.36;心脑血管疾病危险人群:<2.59	M	2014-09-23 11:44:23	部分凝血活酶时间	31.3	S	22-45	M	2014-09-23 11:59:15	*总胆固醇	7.33	mmol/l	3.6-5.17	H	2014-09-23 11:44:23	D二聚体	210	ng/ml	0-115	H	2014-09-23 11:44:59	*葡萄糖	5.3	mmol/l	3.89-6.11	M	2014-09-23 11:44:23	C反应蛋白	7.3	mg/l	0-8	M	2014-09-23 11:44:23	凝血酶原时间(PT)	10.9	S	43023	M	2014-09-23 12:05:47
942	1000210693001	凝血酶原国际比值	0.9		0.7-1.3	M	2014-09-24 11:03:05	低密度脂蛋白	1.68	mmol/l	健康人群:1.8-3.36;心脑血管疾病危险人群:<2.59	M	2014-09-24 09:43:03	部分凝血活酶时间	34.6	S	22-45	M	2014-09-24 10:58:45	*总胆固醇	3.5	mmol/l	3.6-5.17	L	2014-09-24 09:43:03	D二聚体	1470	ng/ml	0-115	H	2014-09-24 10:11:32	*葡萄糖	4.71	mmol/l	3.89-6.11	M	2014-09-24 09:43:03	C反应蛋白	15.55	mg/l	0-8	H	2014-09-24 09:44:04	凝血酶原时间(PT)	11.9	S	43023	M	2014-09-24 11:03:05
943	1000210734001	凝血酶原国际比值	0.86		0.7-1.3	M	2014-09-24 10:35:14	低密度脂蛋白	3.46	mmol/l	健康人群:1.8-3.36;心脑血管疾病危险人群:<2.59	M	2014-09-24 09:35:20	部分凝血活酶时间	26.5	S	22-45	M	2014-09-24 10:28:40	*总胆固醇	5.09	mmol/l	3.6-5.17	M	2014-09-24 09:35:20	D二聚体	214	ng/ml	0-115	H	2014-09-24 10:01:29	*葡萄糖	6.23	mmol/l	3.89-6.11	H	2014-09-24 09:35:20	C反应蛋白	95.4	mg/l	0-8	H	2014-09-29 08:49:41	凝血酶原时间(PT)	11.5	S	43023	M	2014-09-24 10:35:14
944	1000210737001	凝血酶原国际比值	0.97		0.7-1.3	M	2014-09-24 11:41:12	低密度脂蛋白	2.58	mmol/l	健康人群:1.8-3.36;心脑血管疾病危险人群:<2.59	M	2014-09-24 08:45:24	部分凝血活酶时间	25.2	S	22-45	M	2014-09-24 11:41:12	*总胆固醇	4.41	mmol/l	3.6-5.17	M	2014-09-24 08:45:24	D二聚体	60	ng/ml	0-115	M	2014-09-24 11:41:12	*葡萄糖	5.24	mmol/l	3.89-6.11	M	2014-09-24 08:45:23	C反应蛋白	2.66	mg/l	0-8	M	2014-09-24 08:45:23	凝血酶原时间(PT)	11.2	S	42992	M	2014-09-24 11:41:12
945	1000210746001	凝血酶原国际比值	1		0.7-1.3	M	2014-09-24 12:09:16	低密度脂蛋白	2.02	mmol/l	健康人群:1.8-3.36;心脑血管疾病危险人群:<2.59	M	2014-09-24 09:41:02	部分凝血活酶时间	27.7	S	22-45	M	2014-09-24 12:09:16	*总胆固醇	4.42	mmol/l	3.6-5.17	M	2014-09-24 09:41:02	D二聚体	3660	ng/ml	0-115	H	2014-09-24 12:09:16	*葡萄糖	5.24	mmol/l	3.89-6.11	M	2014-09-24 09:41:02	C反应蛋白	81.11	mg/l	0-8	H	2014-09-29 11:42:31	凝血酶原时间(PT)	11.5	S	42992	M	2014-09-24 12:09:16
946	1000210784001	凝血酶原国际比值	0.83		0.7-1.3	M	2014-09-26 07:38:33	低密度脂蛋白	6.65	mmol/l	健康人群:1.8-3.36;心脑血管疾病危险人群:<2.59	M	2014-09-26 09:45:43	部分凝血活酶时间	29.7	S	22-45	M	2014-09-26 07:23:04	*总胆固醇	9.52	mmol/l	3.6-5.17	H	2014-09-26 09:45:43	D二聚体	133	ng/ml	0-115	H	2014-09-26 07:30:16	*葡萄糖	4.29	mmol/l	3.89-6.11	M	2014-09-26 09:45:43	C反应蛋白	3.86	mg/l	0-8	M	2014-09-26 09:45:43	凝血酶原时间(PT)	11	S	43023	M	2014-09-26 07:38:33
947	1000210832001	凝血酶原国际比值	1.15		0.7-1.3	M	2014-09-25 09:55:45	低密度脂蛋白	2.08	mmol/l	健康人群:1.8-3.36;心脑血管疾病危险人群:<2.59	M	2014-09-25 08:51:39	部分凝血活酶时间	23	S	22-45	M	2014-09-25 11:33:45	*总胆固醇	3.86	mmol/l	3.6-5.17	M	2014-09-25 08:51:39	D二聚体	5560	ng/ml	0-115	H	2014-09-25 09:55:45	*葡萄糖	6.82	mmol/l	3.89-6.11	H	2014-09-25 08:51:39	C反应蛋白	10.3	mg/l	0-8	H	2014-10-12 09:18:11	凝血酶原时间(PT)	13.2	S	42992	M	2014-09-25 09:55:45
948	1000210833001	凝血酶原国际比值	0.96		0.7-1.3	M	2014-09-24 12:42:51	低密度脂蛋白	2.9	mmol/l	健康人群:1.8-3.36;心脑血管疾病危险人群:<2.59	M	2014-09-24 10:18:01	部分凝血活酶时间	20	S	22-45	L	2014-09-24 12:42:51	*总胆固醇	5.41	mmol/l	3.6-5.17	H	2014-09-24 10:18:01	D二聚体	140	ng/ml	0-115	H	2014-09-24 12:42:51	*葡萄糖	5.95	mmol/l	3.89-6.11	M	2014-09-24 10:18:01	C反应蛋白	3.48	mg/l	0-8	M	2014-09-24 10:18:01	凝血酶原时间(PT)	11	S	42992	M	2014-09-24 12:42:51
949	1000210839001	凝血酶原国际比值	1.22		0.7-1.3	M	2014-09-25 09:37:46	低密度脂蛋白	3.47	mmol/l	健康人群:1.8-3.36;心脑血管疾病危险人群:<2.59	M	2014-09-25 09:26:38	部分凝血活酶时间	37.3	S	22-45	M	2014-09-25 09:37:46	*总胆固醇	5.79	mmol/l	3.6-5.17	H	2014-09-25 09:26:38	D二聚体	2940	ng/ml	0-115	H	2014-09-25 09:37:46	*葡萄糖	6.16	mmol/l	3.89-6.11	H	2014-09-25 09:26:38	C反应蛋白	83.9	mg/l	0-8	H	2014-09-28 08:45:57	凝血酶原时间(PT)	14	S	42992	M	2014-09-25 11:31:07
950	1000210842001	凝血酶原国际比值	1.05		0.7-1.3	M	2014-09-25 09:27:52	低密度脂蛋白	1.91	mmol/l	健康人群:1.8-3.36;心脑血管疾病危险人群:<2.59	M	2014-09-25 09:28:55	部分凝血活酶时间	24.7	S	22-45	M	2014-09-25 11:29:16	*总胆固醇	3.92	mmol/l	3.6-5.17	M	2014-09-25 09:28:55	D二聚体	170	ng/ml	0-115	H	2014-09-25 09:27:52	*葡萄糖	5.47	mmol/l	3.89-6.11	M	2014-09-25 09:28:55	C反应蛋白	2.22	mg/l	0-8	M	2014-09-25 09:28:55	凝血酶原时间(PT)	12.1	S	42992	M	2014-09-25 09:27:52
951	1000210853001	凝血酶原国际比值	1.09		0.7-1.3	M	2014-09-25 10:03:31	低密度脂蛋白	2.28	mmol/l	健康人群:1.8-3.36;心脑血管疾病危险人群:<2.59	M	2014-09-25 09:26:19	部分凝血活酶时间	34.9	S	22-45	M	2014-09-25 10:03:31	*总胆固醇	4.23	mmol/l	3.6-5.17	M	2014-09-25 09:26:19	D二聚体	650	ng/ml	0-115	H	2014-09-25 10:03:31	*葡萄糖	5.78	mmol/l	3.89-6.11	M	2014-09-25 09:26:19	C反应蛋白	47.86	mg/l	0-8	H	2014-09-26 10:11:38	凝血酶原时间(PT)	12.6	S	42992	M	2014-09-25 10:03:31
952	1000210859001	凝血酶原国际比值	0.85		0.7-1.3	M	2014-09-25 09:53:25	低密度脂蛋白	3.19	mmol/l	健康人群:1.8-3.36;心脑血管疾病危险人群:<2.59	M	2014-09-25 09:26:12	部分凝血活酶时间	31.6	S	22-45	M	2014-09-25 09:42:26	*总胆固醇	5.86	mmol/l	3.6-5.17	H	2014-09-25 09:26:12	D二聚体	476	ng/ml	0-115	H	2014-09-25 09:39:20	*葡萄糖	5.18	mmol/l	3.89-6.11	M	2014-09-25 09:26:12	C反应蛋白	6.28	mg/l	0-8	M	2014-09-25 09:26:12	凝血酶原时间(PT)	11.4	S	43023	M	2014-09-25 09:53:25
953	1000210868001	凝血酶原国际比值	1.09		0.7-1.3	M	2014-09-25 09:25:31	低密度脂蛋白	2.15	mmol/l	健康人群:1.8-3.36;心脑血管疾病危险人群:<2.59	M	2014-09-25 09:10:53	部分凝血活酶时间	22.3	S	22-45	M	2014-09-25 11:29:06	*总胆固醇	4.13	mmol/l	3.6-5.17	M	2014-09-25 09:10:53	D二聚体	80	ng/ml	0-115	M	2014-09-25 09:25:31	*葡萄糖	7.14	mmol/l	3.89-6.11	H	2014-09-25 09:10:53	C反应蛋白	2.94	mg/l	0-8	M	2014-09-25 09:10:53	凝血酶原时间(PT)	12.5	S	42992	M	2014-09-25 09:25:31
954	1000210889001	凝血酶原国际比值	0.94		0.7-1.3	M	2014-09-25 10:09:22	低密度脂蛋白	2.76	mmol/l	健康人群:1.8-3.36;心脑血管疾病危险人群:<2.59	M	2014-09-25 09:28:33	部分凝血活酶时间	35.1	S	22-45	M	2014-09-25 10:05:01	*总胆固醇	4.78	mmol/l	3.6-5.17	M	2014-09-25 09:28:33	D二聚体	1847	ng/ml	0-115	H	2014-09-25 09:51:29	*葡萄糖	5.57	mmol/l	3.89-6.11	M	2014-09-25 09:28:33	C反应蛋白	31	mg/l	0-8	H	2014-09-28 08:59:48	凝血酶原时间(PT)	12.4	S	43023	M	2014-09-25 10:09:22
955	1000210902001	凝血酶原国际比值	1		0.7-1.3	M	2014-09-25 10:37:45	低密度脂蛋白	1.48	mmol/l	健康人群:1.8-3.36;心脑血管疾病危险人群:<2.59	M	2014-09-25 09:26:05	部分凝血活酶时间	22.9	S	22-45	M	2014-09-25 10:37:45	*总胆固醇	4.32	mmol/l	3.6-5.17	M	2014-09-25 09:26:05	D二聚体	2450	ng/ml	0-115	H	2014-09-25 10:37:45	*葡萄糖	8.34	mmol/l	3.89-6.11	H	2014-09-25 09:26:05	C反应蛋白	22.9	mg/l	0-8	H	2014-10-12 09:59:39	凝血酶原时间(PT)	11.5	S	42992	M	2014-09-25 10:37:45
956	1000210905001	凝血酶原国际比值	1.1		0.7-1.3	M	2014-09-25 09:42:46	低密度脂蛋白	2.18	mmol/l	健康人群:1.8-3.36;心脑血管疾病危险人群:<2.59	M	2014-09-25 09:40:23	部分凝血活酶时间	24.7	S	22-45	M	2014-09-25 11:31:50	*总胆固醇	3.65	mmol/l	3.6-5.17	M	2014-09-25 09:40:23	D二聚体	520	ng/ml	0-115	H	2014-09-25 11:31:52	*葡萄糖	4.04	mmol/l	3.89-6.11	M	2014-09-25 09:40:23	C反应蛋白	29	mg/l	0-8	H	2014-09-30 10:38:08	凝血酶原时间(PT)	12.7	S	42992	M	2014-09-25 09:42:46
957	1000210926001	凝血酶原国际比值	0.87		0.7-1.3	M	2014-09-25 11:42:33	低密度脂蛋白	3.61	mmol/l	健康人群:1.8-3.36;心脑血管疾病危险人群:<2.59	M	2014-09-25 11:34:37	部分凝血活酶时间	34.7	S	22-45	M	2014-09-25 11:46:13	*总胆固醇	6.27	mmol/l	3.6-5.17	H	2014-09-25 11:34:37	D二聚体	360	ng/ml	0-115	H	2014-09-25 11:24:52	*葡萄糖	4.57	mmol/l	3.89-6.11	M	2014-09-25 11:34:37	C反应蛋白	3.25	mg/l	0-8	M	2014-09-25 11:34:37	凝血酶原时间(PT)	11.6	S	43023	M	2014-09-25 11:42:33
958	1000210964001	凝血酶原国际比值	0.85		0.7-1.3	M	2014-09-26 10:07:07	低密度脂蛋白	3.03	mmol/l	健康人群:1.8-3.36;心脑血管疾病危险人群:<2.59	M	2014-09-26 10:11:20	部分凝血活酶时间	28.9	S	22-45	M	2014-09-26 10:03:05	*总胆固醇	5.29	mmol/l	3.6-5.17	H	2014-09-26 10:11:20	D二聚体	188	ng/ml	0-115	H	2014-09-26 11:12:14	*葡萄糖	4.95	mmol/l	3.89-6.11	M	2014-09-26 10:11:20	C反应蛋白	3.33	mg/l	0-8	M	2014-09-26 10:11:20	凝血酶原时间(PT)	11.2	S	43023	M	2014-09-26 10:07:07
959	1000210986001	凝血酶原国际比值	0.9		0.7-1.3	M	2014-09-25 14:05:11	低密度脂蛋白	4.04	mmol/l	健康人群:1.8-3.36;心脑血管疾病危险人群:<2.59	M	2014-09-25 14:05:19	部分凝血活酶时间	27.9	S	22-45	M	2014-09-25 13:57:54	*总胆固醇	7.4	mmol/l	3.6-5.17	H	2014-09-25 14:05:19	D二聚体	139	ng/ml	0-115	H	2014-09-25 14:02:45	*葡萄糖	7.4	mmol/l	3.89-6.11	H	2014-09-25 14:05:19	C反应蛋白	1.2	mg/l	0-8	M	2014-09-25 14:05:19	凝血酶原时间(PT)	11.9	S	43023	M	2014-09-25 14:05:11
960	1000211040001	凝血酶原国际比值	0.97		0.7-1.3	M	2014-09-26 10:50:25	低密度脂蛋白	1.91	mmol/l	健康人群:1.8-3.36;心脑血管疾病危险人群:<2.59	M	2014-09-26 10:58:39	部分凝血活酶时间	24.2	S	22-45	M	2014-09-26 10:50:25	*总胆固醇	4.7	mmol/l	3.6-5.17	M	2014-09-26 10:58:39	D二聚体	20	ng/ml	0-115	M	2014-09-26 10:50:25	*葡萄糖	4.72	mmol/l	3.89-6.11	M	2014-09-26 10:58:39	C反应蛋白	1.77	mg/l	0-8	M	2014-09-26 10:58:39	凝血酶原时间(PT)	11.1	S	42992	M	2014-09-26 10:50:25
961	1000211042001	凝血酶原国际比值	0.93		0.7-1.3	M	2014-09-27 11:13:31	低密度脂蛋白	4.25	mmol/l	健康人群:1.8-3.36;心脑血管疾病危险人群:<2.59	M	2014-09-27 09:14:48	部分凝血活酶时间	23	S	22-45	M	2014-09-27 11:27:33	*总胆固醇	6.54	mmol/l	3.6-5.17	H	2014-09-27 09:14:48	D二聚体	110	ng/ml	0-115	M	2014-09-27 11:27:36	*葡萄糖	5.48	mmol/l	3.89-6.11	M	2014-09-27 09:14:48	C反应蛋白	5.02	mg/l	0-8	M	2014-09-27 09:03:04	凝血酶原时间(PT)	10.7	S	42992	M	2014-09-27 11:13:31
962	1000211050004	凝血酶原国际比值	0.96		0.7-1.3	M	2016-09-11 16:24:05	低密度脂蛋白	1.36	mmol/l	健康人群:1.8-3.36;心脑血管疾病危险人群:<2.59	M	2016-09-11 16:33:07	部分凝血活酶时间	27.2	S	20-40	M	2016-09-11 16:23:24	*总胆固醇	7.22	mmol/l	3.6-5.17	H	2016-09-11 16:33:07	D二聚体	102	ng/ml	0-115	M	2016-09-11 17:05:47	*葡萄糖	5.83	mmol/l	3.89-6.11	M	2016-09-11 16:33:07	C反应蛋白	22.06	mg/l	0-8	H	2016-09-16 09:01:28	凝血酶原时间(PT)	11.9	S	43023	M	2016-09-11 16:24:05
963	1000211057001	凝血酶原国际比值	0.87		0.7-1.3	M	2014-09-26 12:26:26	低密度脂蛋白	3.68	mmol/l	健康人群:1.8-3.36;心脑血管疾病危险人群:<2.59	M	2014-09-26 12:28:58	部分凝血活酶时间	33.1	S	22-45	M	2014-09-26 12:22:10	*总胆固醇	6.2	mmol/l	3.6-5.17	H	2014-09-26 12:28:58	D二聚体	147	ng/ml	0-115	H	2014-09-26 11:58:05	*葡萄糖	5.1	mmol/l	3.89-6.11	M	2014-09-26 12:28:58	C反应蛋白	22.6	mg/l	0-8	H	2014-09-26 12:28:58	凝血酶原时间(PT)	11.5	S	43023	M	2014-09-26 12:26:26
964	1000211063001	凝血酶原国际比值	0.98		0.7-1.3	M	2014-09-26 13:00:16	低密度脂蛋白	3.68	mmol/l	健康人群:1.8-3.36;心脑血管疾病危险人群:<2.59	M	2014-09-26 13:05:28	部分凝血活酶时间	26.7	S	22-45	M	2014-09-26 13:00:16	*总胆固醇	5.1	mmol/l	3.6-5.17	M	2014-09-26 13:05:28	D二聚体	100	ng/ml	0-115	M	2014-09-26 13:00:16	*葡萄糖	4	mmol/l	3.89-6.11	M	2014-09-26 13:05:28	C反应蛋白	1.2	mg/l	0-8	M	2014-09-26 12:57:16	凝血酶原时间(PT)	11.3	S	42992	M	2014-09-26 13:00:16
965	1000211074001	凝血酶原国际比值	1.18		0.7-1.3	M	2014-09-26 13:34:59	低密度脂蛋白	1.63	mmol/l	健康人群:1.8-3.36;心脑血管疾病危险人群:<2.59	M	2014-09-26 13:39:40	部分凝血活酶时间	31.4	S	22-45	M	2014-09-26 13:34:59	*总胆固醇	3.7	mmol/l	3.6-5.17	M	2014-09-26 13:39:40	D二聚体	120	ng/ml	0-115	H	2014-09-26 13:34:59	*葡萄糖	5.7	mmol/l	3.89-6.11	M	2014-09-26 13:39:40	C反应蛋白	31.5	mg/l	0-8	H	2014-09-26 13:39:41	凝血酶原时间(PT)	13.6	S	42992	M	2014-09-26 13:34:59
966	1000211094001	凝血酶原国际比值	0.98		0.7-1.3	M	2014-09-27 10:29:12	低密度脂蛋白	2.26	mmol/l	健康人群:1.8-3.36;心脑血管疾病危险人群:<2.59	M	2014-09-27 10:16:16	部分凝血活酶时间	23.5	S	22-45	M	2014-09-27 10:29:12	*总胆固醇	3.59	mmol/l	3.6-5.17	L	2014-09-27 10:16:16	D二聚体	100	ng/ml	0-115	M	2014-09-27 10:29:12	*葡萄糖	4.51	mmol/l	3.89-6.11	M	2014-09-27 10:16:16	C反应蛋白	2.46	mg/l	0-8	M	2014-09-30 09:24:51	凝血酶原时间(PT)	11.3	S	42992	M	2014-09-27 10:29:12
967	1000211140001	凝血酶原国际比值	0.86		0.7-1.3	M	2014-09-29 11:03:18	低密度脂蛋白	3.26	mmol/l	健康人群:1.8-3.36;心脑血管疾病危险人群:<2.59	M	2014-09-29 10:45:35	部分凝血活酶时间	30.5	S	22-45	M	2014-09-29 10:12:34	*总胆固醇	5.91	mmol/l	3.6-5.17	H	2014-09-29 10:45:35	D二聚体	1022	ng/ml	0-115	H	2014-09-29 09:30:32	*葡萄糖	4.56	mmol/l	3.89-6.11	M	2014-09-29 10:45:35	C反应蛋白	78	mg/l	0-8	H	2014-10-01 07:26:00	凝血酶原时间(PT)	11.4	S	43023	M	2014-09-29 11:03:16
968	1000211152001	凝血酶原国际比值	0.98		0.7-1.3	M	2014-09-29 07:48:23	低密度脂蛋白	2.57	mmol/l	健康人群:1.8-3.36;心脑血管疾病危险人群:<2.59	M	2014-09-29 07:49:49	部分凝血活酶时间	27.5	S	22-45	M	2014-09-29 07:48:23	*总胆固醇	5.4	mmol/l	3.6-5.17	H	2014-09-29 07:49:49	D二聚体	30	ng/ml	0-115	M	2014-09-29 07:48:23	*葡萄糖	4.7	mmol/l	3.89-6.11	M	2014-09-29 07:49:49	C反应蛋白	0.4	mg/l	0-8	M	2014-09-29 08:17:20	凝血酶原时间(PT)	11.3	S	42992	M	2014-09-29 07:48:23
969	1000211174001	凝血酶原国际比值	1		0.7-1.3	M	2014-09-28 09:48:46	低密度脂蛋白	2.73	mmol/l	健康人群:1.8-3.36;心脑血管疾病危险人群:<2.59	M	2014-09-28 09:46:18	部分凝血活酶时间	25.7	S	22-45	M	2014-09-28 09:48:46	*总胆固醇	4.6	mmol/l	3.6-5.17	M	2014-09-28 09:46:18	D二聚体	1160	ng/ml	0-115	H	2014-09-28 09:48:46	*葡萄糖	4.6	mmol/l	3.89-6.11	M	2014-09-28 09:46:18	C反应蛋白	10.7	mg/l	0-8	H	2014-09-28 09:46:18	凝血酶原时间(PT)	11.5	S	42992	M	2014-09-28 09:48:46
970	1000211223001	凝血酶原国际比值	0.93		0.7-1.3	M	2014-09-30 10:46:49	低密度脂蛋白	1.09	mmol/l	健康人群:1.8-3.36;心脑血管疾病危险人群:<2.59	M	2014-09-29 08:56:56	部分凝血活酶时间	23.4	S	22-45	M	2014-09-30 10:44:28	*总胆固醇	2.12	mmol/l	3.6-5.17	L	2014-09-29 08:56:56	D二聚体	307	ng/ml	0-115	H	2014-11-10 09:40:54	*葡萄糖	7	mmol/l	3.89-6.11	H	2014-09-29 08:56:56	C反应蛋白	3.12	mg/l	0-8	M	2015-01-03 08:46:36	凝血酶原时间(PT)	12.2	S	43023	M	2014-09-30 10:46:49
971	1000211226001	凝血酶原国际比值	0.89		0.7-1.3	M	2014-09-29 11:01:29	低密度脂蛋白	1.96	mmol/l	健康人群:1.8-3.36;心脑血管疾病危险人群:<2.59	M	2014-09-29 09:20:19	部分凝血活酶时间	35.8	S	22-45	M	2014-09-29 11:01:33	*总胆固醇	3.52	mmol/l	3.6-5.17	L	2014-09-29 09:20:19	D二聚体	263	ng/ml	0-115	H	2014-09-29 10:55:10	*葡萄糖	4.76	mmol/l	3.89-6.11	M	2014-09-29 09:20:19	C反应蛋白	5.4	mg/l	0-8	M	2014-09-30 09:47:53	凝血酶原时间(PT)	11.7	S	43023	M	2014-09-29 11:01:27
972	1000211226002	凝血酶原国际比值	0.9		0.7-1.3	M	2015-02-28 10:05:12	低密度脂蛋白	2.08	mmol/l	健康人群:1.8-3.36;心脑血管疾病危险人群:<2.59	M	2015-02-28 11:05:47	部分凝血活酶时间	35.3	S	22-45	M	2015-02-28 09:39:41	*总胆固醇	3.86	mmol/l	3.6-5.17	M	2015-02-28 11:05:47	D二聚体	117	ng/ml	0-115	H	2015-02-28 09:20:50	*葡萄糖	6.5	mmol/l	3.89-6.11	H	2015-02-28 11:05:47	C反应蛋白	0.71	mg/l	0-8	M	2015-02-28 11:05:47	凝血酶原时间(PT)	11.9	S	43023	M	2015-02-28 10:05:12
973	1000211231001	凝血酶原国际比值	1.02		0.7-1.3	M	2014-09-29 09:27:40	低密度脂蛋白	2.52	mmol/l	健康人群:1.8-3.36;心脑血管疾病危险人群:<2.59	M	2014-09-29 09:10:08	部分凝血活酶时间	30.6	S	22-45	M	2014-09-29 09:27:40	*总胆固醇	4	mmol/l	3.6-5.17	M	2014-09-29 09:10:08	D二聚体	100	ng/ml	0-115	M	2014-09-29 09:27:40	*葡萄糖	4.21	mmol/l	3.89-6.11	M	2014-09-29 09:10:08	C反应蛋白	9.71	mg/l	0-8	H	2014-09-29 11:49:33	凝血酶原时间(PT)	11.7	S	42992	M	2014-09-29 09:27:40
974	1000211251001	凝血酶原国际比值	1.03		0.7-1.3	M	2014-09-29 10:26:43	低密度脂蛋白	1.13	mmol/l	健康人群:1.8-3.36;心脑血管疾病危险人群:<2.59	M	2014-09-29 09:18:09	部分凝血活酶时间	23.3	S	22-45	M	2014-09-29 10:26:43	*总胆固醇	2.81	mmol/l	3.6-5.17	L	2014-09-29 09:18:09	D二聚体	2120	ng/ml	0-115	H	2014-09-29 11:23:39	*葡萄糖	6.08	mmol/l	3.89-6.11	M	2014-09-29 09:18:09	C反应蛋白	0.8	mg/l	0-8	M	2014-10-11 09:19:07	凝血酶原时间(PT)	11.8	S	42992	M	2014-09-29 10:26:43
975	1000211272001	凝血酶原国际比值	0.94		0.7-1.3	M	2014-09-30 10:18:28	低密度脂蛋白	1.15	mmol/l	健康人群:1.8-3.36;心脑血管疾病危险人群:<2.59	M	2014-09-30 09:47:51	部分凝血活酶时间	37.4	S	22-45	M	2014-09-30 10:29:46	*总胆固醇	2.5	mmol/l	3.6-5.17	L	2014-09-30 09:47:51	D二聚体	318	ng/ml	0-115	H	2014-09-30 09:00:01	*葡萄糖	5.65	mmol/l	3.89-6.11	M	2014-09-30 09:47:51	C反应蛋白	42.02	mg/l	0-8	H	2014-09-30 09:34:37	凝血酶原时间(PT)	12.3	S	43023	M	2014-09-30 10:18:28
976	1000211277001	凝血酶原国际比值	1.08		0.7-1.3	M	2014-09-30 11:19:22	低密度脂蛋白	2.44	mmol/l	健康人群:1.8-3.36;心脑血管疾病危险人群:<2.59	M	2014-09-30 09:24:47	部分凝血活酶时间	40.7	S	22-45	M	2014-09-30 11:12:08	*总胆固醇	5.24	mmol/l	3.6-5.17	H	2014-09-30 09:24:47	D二聚体	358	ng/ml	0-115	H	2014-09-30 10:13:56	*葡萄糖	5.07	mmol/l	3.89-6.11	M	2014-09-30 09:24:47	C反应蛋白	1.17	mg/l	0-8	M	2014-10-06 10:48:43	凝血酶原时间(PT)	14.1	S	43023	M	2014-09-30 11:19:22
977	1000211328002	凝血酶原国际比值	0.95		0.7-1.3	M	2016-12-20 09:31:22	低密度脂蛋白	2.84	mmol/l	健康人群:1.8-3.36;心脑血管疾病危险人群:<2.59	M	2016-12-20 09:38:09	部分凝血活酶时间	27.2	S	20-40	M	2016-12-20 09:31:22	*总胆固醇	4.71	mmol/l	3.6-5.17	M	2016-12-20 09:38:09	D二聚体	120	ng/ml	0-115	H	2016-12-20 09:31:22	*葡萄糖	4.53	mmol/l	3.89-6.11	M	2016-12-20 09:38:09	C反应蛋白	0.07	mg/l	0-8	M	2016-12-20 09:47:28	凝血酶原时间(PT)	10.9	S	42992	M	2016-12-20 09:31:22
978	1000211336001	凝血酶原国际比值	0.93		0.7-1.3	M	2014-09-30 10:46:49	低密度脂蛋白	2.03	mmol/l	健康人群:1.8-3.36;心脑血管疾病危险人群:<2.59	M	2014-09-30 09:25:40	部分凝血活酶时间	37.5	S	22-45	M	2014-09-30 10:44:39	*总胆固醇	3.67	mmol/l	3.6-5.17	M	2014-09-30 09:25:40	D二聚体	278	ng/ml	0-115	H	2014-09-30 09:59:29	*葡萄糖	5.45	mmol/l	3.89-6.11	M	2014-09-30 09:25:40	C反应蛋白	4.4	mg/l	0-8	M	2014-10-06 13:48:18	凝血酶原时间(PT)	12.2	S	43023	M	2014-09-30 10:46:49
979	1000211366001	凝血酶原国际比值	0.92		0.7-1.3	M	2014-09-30 10:46:59	低密度脂蛋白	2.69	mmol/l	健康人群:1.8-3.36;心脑血管疾病危险人群:<2.59	M	2014-09-30 09:26:28	部分凝血活酶时间	31.8	S	22-45	M	2014-09-30 10:44:33	*总胆固醇	5.12	mmol/l	3.6-5.17	M	2014-09-30 09:26:28	D二聚体	136	ng/ml	0-115	H	2014-09-30 10:53:53	*葡萄糖	5.35	mmol/l	3.89-6.11	M	2014-09-30 09:26:28	C反应蛋白	2.2	mg/l	0-8	M	2014-10-04 07:40:31	凝血酶原时间(PT)	12.1	S	43023	M	2014-09-30 10:46:59
980	1000211377001	凝血酶原国际比值	1.06		0.7-1.3	M	2014-10-01 09:49:42	低密度脂蛋白	0.74	mmol/l	健康人群:1.8-3.36;心脑血管疾病危险人群:<2.59	M	2014-10-01 09:11:36	部分凝血活酶时间	25.8	S	22-45	M	2014-10-01 09:49:42	*总胆固醇	5.43	mmol/l	3.6-5.17	H	2014-10-01 09:11:36	D二聚体	570	ng/ml	0-115	H	2014-10-01 09:49:42	*葡萄糖	5.18	mmol/l	3.89-6.11	M	2014-10-01 09:11:36	C反应蛋白	1.67	mg/l	0-8	M	2014-10-12 19:10:50	凝血酶原时间(PT)	12.2	S	42992	M	2014-10-01 09:49:42
981	1000211394001	凝血酶原国际比值	0.92		0.7-1.3	M	2014-10-01 10:29:06	低密度脂蛋白	3.37	mmol/l	健康人群:1.8-3.36;心脑血管疾病危险人群:<2.59	M	2014-10-01 10:25:03	部分凝血活酶时间	32	S	22-45	M	2014-10-01 10:32:47	*总胆固醇	5.41	mmol/l	3.6-5.17	H	2014-10-01 10:25:03	D二聚体	760	ng/ml	0-115	H	2014-10-01 10:18:57	*葡萄糖	4.63	mmol/l	3.89-6.11	M	2014-10-01 10:25:03	C反应蛋白	3.59	mg/l	0-8	M	2014-10-01 10:25:03	凝血酶原时间(PT)	12.1	S	43023	M	2014-10-01 10:29:06
982	1000211398001	凝血酶原国际比值	0.9		0.7-1.3	M	2014-09-30 12:56:32	低密度脂蛋白	2.7	mmol/l	健康人群:1.8-3.36;心脑血管疾病危险人群:<2.59	M	2014-09-30 12:51:55	部分凝血活酶时间	30.2	S	22-45	M	2014-09-30 12:40:48	*总胆固醇	5.6	mmol/l	3.6-5.17	H	2014-09-30 12:51:55	D二聚体	191	ng/ml	0-115	H	2014-09-30 13:04:24	*葡萄糖	5.1	mmol/l	3.89-6.11	M	2014-09-30 12:51:55	C反应蛋白	0.7	mg/l	0-8	M	2014-09-30 12:53:29	凝血酶原时间(PT)	11.8	S	43023	M	2014-09-30 12:56:32
983	1000211422001	凝血酶原国际比值	0.9		0.7-1.3	M	2014-10-01 10:09:50	低密度脂蛋白	3.94	mmol/l	健康人群:1.8-3.36;心脑血管疾病危险人群:<2.59	M	2014-10-01 09:28:18	部分凝血活酶时间	29.7	S	22-45	M	2014-10-01 10:02:12	*总胆固醇	6.66	mmol/l	3.6-5.17	H	2014-10-01 09:28:19	D二聚体	867	ng/ml	0-115	H	2014-10-01 09:42:07	*葡萄糖	5.26	mmol/l	3.89-6.11	M	2014-10-01 09:28:18	C反应蛋白	20.58	mg/l	0-8	H	2014-10-01 09:28:18	凝血酶原时间(PT)	11.8	S	43023	M	2014-10-01 10:09:50
984	1000211429003	凝血酶原国际比值	1.05		0.7-1.3	M	2016-10-12 09:55:34	低密度脂蛋白	2.96	mmol/l	健康人群:1.8-3.36;心脑血管疾病危险人群:<2.59	M	2016-10-12 11:06:37	部分凝血活酶时间	35.2	S	20-40	M	2016-10-12 09:55:34	*总胆固醇	5.24	mmol/l	3.6-5.17	H	2016-10-12 11:06:37	D二聚体	1500	ng/ml	0-115	H	2016-10-12 10:03:56	*葡萄糖	6.25	mmol/l	3.89-6.11	H	2016-10-12 11:06:37	C反应蛋白	118.23	mg/l	0-8	H	2016-10-12 11:06:37	凝血酶原时间(PT)	12.1	S	42992	M	2016-10-12 09:55:34
985	1000211429004	凝血酶原国际比值	0.95		0.7-1.3	M	2017-03-01 10:08:03	低密度脂蛋白	3.54	mmol/l	健康人群:1.8-3.36;心脑血管疾病危险人群:<2.59	M	2017-03-01 09:43:37	部分凝血活酶时间	28.9	S	20-40	M	2017-03-01 10:08:03	*总胆固醇	6.75	mmol/l	3.6-5.17	H	2017-03-01 09:43:37	D二聚体	570	ng/ml	0-115	H	2017-03-01 10:08:03	*葡萄糖	6.53	mmol/l	3.89-6.11	H	2017-03-01 09:43:37	C反应蛋白	9.08	mg/l	0-8	H	2017-03-01 09:43:37	凝血酶原时间(PT)	10.9	S	42992	M	2017-03-01 10:08:03
986	1000211436001	凝血酶原国际比值	0.95		0.7-1.3	M	2014-10-01 09:36:56	低密度脂蛋白	2.99	mmol/l	健康人群:1.8-3.36;心脑血管疾病危险人群:<2.59	M	2014-10-01 09:11:09	部分凝血活酶时间	35.2	S	22-45	M	2014-10-01 09:25:57	*总胆固醇	5.19	mmol/l	3.6-5.17	H	2014-10-01 09:11:09	D二聚体	12940	ng/ml	0-115	H	2014-10-07 07:15:45	*葡萄糖	4.96	mmol/l	3.89-6.11	M	2014-10-01 09:11:09	C反应蛋白	38.23	mg/l	0-8	H	2014-10-03 10:31:09	凝血酶原时间(PT)	12.5	S	43023	M	2014-10-01 09:36:56
987	1000211450001	凝血酶原国际比值	1.03		0.7-1.3	M	2014-10-01 10:12:20	低密度脂蛋白	2.19	mmol/l	健康人群:1.8-3.36;心脑血管疾病危险人群:<2.59	M	2014-10-01 09:11:14	部分凝血活酶时间	28	S	22-45	M	2014-10-01 10:12:20	*总胆固醇	4.17	mmol/l	3.6-5.17	M	2014-10-01 09:11:14	D二聚体	1780	ng/ml	0-115	H	2014-10-01 10:12:20	*葡萄糖	4.74	mmol/l	3.89-6.11	M	2014-10-01 09:11:14	C反应蛋白	1.66	mg/l	0-8	M	2014-10-04 07:38:19	凝血酶原时间(PT)	11.9	S	42992	M	2014-10-01 10:12:20
[truncated: 10,002 more rows]
[truncated: 35 more columns]

## Sheet: Sheet1
1	1	1	2	1	1	1	1	1	2	1	1	1	0	68	0	0
1	1	1	0	2	1	2	1	2	1	1	2	1	0	54	0	0
1	1	1	1	2	1	1	1	1	1	1	1	1	1	61	1	0
1	1	1	2	1	2	2	1	1	2	1	1	1	0	67	0	0
1	1	1	1	2	1	2	1	1	1	1	1	1	0	69	1	0
[truncated: 10,770 more rows]
